# Supplementary material for: Adaptive response by an electrolyte: resilience to electron losses in a dye-sensitized porous photoanode
Source: Chem Sci. 2021 Mar 25;12(17):6117–28. doi: 10.1039/d1sc00384d (PMC8098693; doi:10.1039/d1sc00384d)
Supplement: SC-012-D1SC00384D-s001 [file SC-012-D1SC00384D-s001.xlsx]

## Sheet: Fig 3a
PD59-20
1x	Scenario 3 (no electron trapping)				Scenario 1				Scenario 2
	position	I3-	I-		position	I3-	I-		position	I3-	I-
	um				um				um
	1	1.06462e+20	1.81224e+20		1	1.07072e+20	1.82113e+20		1	9.33374e+19	1.7927e+20
	2	1.06249e+20	1.81527e+20		2	1.06842e+20	1.82428e+20		2	9.31637e+19	1.79586e+20
	3	1.05864e+20	1.82162e+20		3	1.06428e+20	1.83076e+20		3	9.27781e+19	1.80199e+20
	4	1.05203e+20	1.83118e+20		4	1.05777e+20	1.8403e+20		4	9.22171e+19	1.81132e+20
	5	1.04375e+20	1.84336e+20		5	1.04939e+20	1.85308e+20		5	9.14564e+19	1.82418e+20
	6	1.03345e+20	1.85909e+20		6	1.03898e+20	1.86881e+20		6	9.05149e+19	1.83976e+20
	7	1.02089e+20	1.87782e+20		7	1.02622e+20	1.88784e+20		7	8.93901e+19	1.85864e+20
	8	1.00594e+20	1.90017e+20		8	1.0115e+20	1.90938e+20		8	8.80576e+19	1.88064e+20
	9	9.89447e+19	1.92511e+20		9	9.94582e+19	1.9348e+20		9	8.65538e+19	1.9061e+20
	10	9.70361e+19	1.95327e+20		10	9.75505e+19	1.96292e+20		10	8.48317e+19	1.93427e+20
	11	9.4905e+19	1.98468e+20		11	9.54185e+19	1.99373e+20		11	8.29351e+19	1.96625e+20
	12	9.26568e+19	2.01907e+20		12	9.31044e+19	2.02859e+20		12	8.08357e+19	2.00083e+20
	13	9.01143e+19	2.05734e+20		13	9.05312e+19	2.06639e+20		13	7.85748e+19	2.0389e+20
	14	8.73336e+19	2.09797e+20		14	8.78011e+19	2.10682e+20		14	7.60675e+19	2.07969e+20
	15	8.44127e+19	2.14177e+20		15	8.48146e+19	2.15039e+20		15	7.33889e+19	2.12386e+20
	16	8.12676e+19	2.18925e+20		16	8.16342e+19	2.19776e+20		16	7.05321e+19	2.17103e+20
	17	7.78958e+19	2.2395e+20		17	7.82838e+19	2.24737e+20		17	6.74204e+19	2.22153e+20
	18	7.42711e+19	2.29257e+20		18	7.45887e+19	2.30062e+20		18	6.41669e+19	2.2752e+20
	19	7.04536e+19	2.34979e+20		19	7.07889e+19	2.35567e+20		19	6.06837e+19	2.33201e+20
	20	6.63991e+19	2.40891e+20		20	6.67489e+19	2.41532e+20		20	5.70094e+19	2.39201e+20
	21	6.4414e+19	2.44713e+20		21	6.4113e+19	2.45616e+20		21	5.5685e+19	2.42907e+20
	22	6.22044e+19	2.47096e+20		22	6.24434e+19	2.4767e+20		22	5.33444e+19	2.45202e+20
	23	6.02882e+19	2.49874e+20		23	6.05004e+19	2.50432e+20		23	5.16697e+19	2.47898e+20
	24	5.8406e+19	2.52652e+20		24	5.86288e+19	2.53171e+20		24	5.00482e+19	2.50561e+20
	25	5.65377e+19	2.55383e+20		25	5.67397e+19	2.559e+20		25	4.84601e+19	2.53202e+20
	26	5.4686e+19	2.58116e+20		26	5.48843e+19	2.5861e+20		26	4.68618e+19	2.55829e+20
	27	5.28806e+19	2.60822e+20		27	5.30534e+19	2.61284e+20		27	4.5302e+19	2.58468e+20
	28	5.10707e+19	2.63503e+20		28	5.12413e+19	2.63947e+20		28	4.37422e+19	2.61029e+20
	29	4.92671e+19	2.66159e+20		29	4.9473e+19	2.66598e+20		29	4.22405e+19	2.63587e+20
	30	4.75092e+19	2.68818e+20		30	4.76715e+19	2.69202e+20		30	4.07054e+19	2.66068e+20
	31	4.57731e+19	2.71449e+20		31	4.59197e+19	2.71831e+20		31	3.92176e+19	2.68566e+20
	32	4.40631e+19	2.74033e+20		32	4.41988e+19	2.74418e+20		32	3.77472e+19	2.71043e+20
	33	4.23356e+19	2.76635e+20		33	4.24621e+19	2.76972e+20		33	3.62645e+19	2.73501e+20
	34	4.06485e+19	2.79186e+20		34	4.07795e+19	2.79534e+20		34	3.48254e+19	2.7593e+20
	35	3.89831e+19	2.8173e+20		35	3.90749e+19	2.82053e+20		35	3.3396e+19	2.78313e+20
	36	3.73086e+19	2.84274e+20		36	3.74257e+19	2.84561e+20		36	3.19794e+19	2.80701e+20
	37	3.5661e+19	2.86757e+20		37	3.57931e+19	2.87055e+20		37	3.05765e+19	2.83035e+20
	38	3.40407e+19	2.8925e+20		38	3.41343e+19	2.89528e+20		38	2.91759e+19	2.85386e+20
	39	3.24219e+19	2.91712e+20		39	3.25047e+19	2.91976e+20		39	2.77995e+19	2.87672e+20
	40	3.08296e+19	2.94189e+20		40	3.09046e+19	2.94418e+20		40	2.64347e+19	2.89972e+20
	41	2.92223e+19	2.96607e+20		41	2.93114e+19	2.96835e+20		41	2.50884e+19	2.92229e+20
	42	2.76691e+19	2.99019e+20		42	2.77417e+19	2.99252e+20		42	2.37423e+19	2.94497e+20
	43	2.61105e+19	3.01404e+20		43	2.61692e+19	3.01614e+20		43	2.23977e+19	2.96689e+20
	44	2.45381e+19	3.03807e+20		44	2.46013e+19	3.03997e+20		44	2.10899e+19	2.98881e+20
	45	2.30133e+19	3.06161e+20		45	2.30509e+19	3.06333e+20		45	1.97685e+19	3.01047e+20
	46	2.14661e+19	3.08537e+20		46	2.15242e+19	3.08693e+20		46	1.84573e+19	3.03207e+20
	47	1.99479e+19	3.10869e+20		47	2.00096e+19	3.11029e+20		47	1.71567e+19	3.05346e+20
	48	1.84275e+19	3.1319e+20		48	1.84594e+19	3.13314e+20		48	1.58588e+19	3.07463e+20
	49	1.69364e+19	3.15481e+20		49	1.69716e+19	3.15622e+20		49	1.45862e+19	3.09566e+20
	50	1.54338e+19	3.17748e+20		50	1.54804e+19	3.17891e+20		50	1.33051e+19	3.11624e+20
	51	1.3942e+19	3.20052e+20		51	1.39805e+19	3.20156e+20		51	1.20168e+19	3.1366e+20
	52	1.24629e+19	3.22272e+20		52	1.24885e+19	3.22389e+20		52	1.07511e+19	3.15719e+20
	53	1.09805e+19	3.24527e+20		53	1.10265e+19	3.24622e+20		53	9.4824e+18	3.17731e+20
	54	9.5119e+18	3.26743e+20		54	9.53839e+18	3.26856e+20		54	8.22934e+18	3.19728e+20
	55	8.05446e+18	3.28964e+20		55	8.04693e+18	3.29043e+20		55	6.96273e+18	3.21727e+20
	56	6.57444e+18	3.31151e+20		56	6.58588e+18	3.31244e+20		56	5.69402e+18	3.23679e+20
	57	5.11881e+18	3.33371e+20		57	5.12392e+18	3.33407e+20		57	4.43403e+18	3.2564e+20
	58	3.64631e+18	3.35528e+20		58	3.66738e+18	3.35573e+20		58	3.15839e+18	3.27562e+20
	59	2.18195e+18	3.37729e+20		59	2.1973e+18	3.37725e+20		59	1.89419e+18	3.29467e+20
	60	7.32032e+17	3.39886e+20		60	7.32935e+17	3.3989e+20		60	6.53471e+17	3.31378e+20
5x	1	1.85892e+20	0		1	1.98708e+20	2.107e+16		1	1.68794e+20	1.4749e+16
	2	1.86111e+20	0		2	1.98715e+20	1.9565e+16		2	1.68788e+20	1.4749e+16
	3	1.86657e+20	0		3	1.98766e+20	2.107e+16		3	1.68773e+20	1.5652e+16
	4	1.87445e+20	0		4	1.9875e+20	2.8294e+16		4	1.6878e+20	1.3244e+16
	5	1.88694e+20	0		5	1.9874e+20	2.5585e+16		5	1.68779e+20	1.7759e+16
	6	1.90639e+20	0		6	1.98676e+20	2.4682e+16		6	1.68762e+20	1.4749e+16
	7	1.92411e+20	0		7	1.98661e+20	2.7391e+16		7	1.68742e+20	1.8662e+16
	8	1.92403e+20	0		8	1.98592e+20	3.5217e+16		8	1.68724e+20	1.9866e+16
	9	1.92383e+20	0		9	1.98524e+20	4.1538e+16		9	1.68725e+20	2.7993e+16
	10	1.92357e+20	0		10	1.98509e+20	5.0869e+16		10	1.68709e+20	2.8294e+16
	11	1.92317e+20	0		11	1.9842e+20	5.5083e+16		11	1.6866e+20	3.612e+16
	12	1.9226e+20	0		12	1.98328e+20	7.4648e+16		12	1.68611e+20	3.9431e+16
	13	1.92197e+20	0		13	1.97993e+20	4.68958e+17		13	1.68562e+20	9.5116e+16
	14	1.91155e+20	1.55406e+18		14	1.96595e+20	2.3466e+18		14	1.67719e+20	1.27654e+18
	15	1.88822e+20	4.76844e+18		15	1.94059e+20	5.93783e+18		15	1.65787e+20	4.13153e+18
	16	1.85378e+20	9.79454e+18		16	1.90362e+20	1.11054e+19		16	1.62647e+20	8.75218e+18
	17	1.80678e+20	1.64322e+19		17	1.85339e+20	1.7939e+19		17	1.58398e+20	1.51108e+19
	18	1.74816e+20	2.48695e+19		18	1.79131e+20	2.64377e+19		18	1.52959e+20	2.32513e+19
	19	1.67746e+20	3.50108e+19		19	1.71769e+20	3.65047e+19		19	1.46336e+20	3.30971e+19
	20	1.59452e+20	4.69006e+19		20	1.63112e+20	4.83337e+19		20	1.38568e+20	4.46907e+19
	21	1.55015e+20	5.3879e+19		21	1.58326e+20	5.3879e+19		21	1.36052e+20	4.9063e+19
	22	1.5e+20	6.02611e+19		22	1.53273e+20	6.16174e+19		22	1.30068e+20	5.73778e+19
	23	1.45715e+20	6.63404e+19		23	1.48806e+20	6.75865e+19		23	1.26298e+20	6.30682e+19
	24	1.41428e+20	7.23944e+19		24	1.44364e+20	7.36099e+19		24	1.22447e+20	6.87957e+19
	25	1.37188e+20	7.83985e+19		25	1.39976e+20	7.95898e+19		25	1.18697e+20	7.4456e+19
	26	1.32996e+20	8.44019e+19		26	1.3558e+20	8.55132e+19		26	1.14948e+20	8.01051e+19
	27	1.28745e+20	9.03786e+19		27	1.31229e+20	9.1433e+19		27	1.11201e+20	8.57299e+19
	28	1.24573e+20	9.63272e+19		28	1.26934e+20	9.74054e+19		28	1.07542e+20	9.133e+19
	29	1.20378e+20	1.02283e+20		29	1.22595e+20	1.03195e+20		29	1.03856e+20	9.68708e+19
	30	1.16297e+20	1.08181e+20		30	1.18312e+20	1.09109e+20		30	1.0021e+20	1.02488e+20
	31	1.12138e+20	1.1404e+20		31	1.1408e+20	1.14961e+20		31	9.65771e+19	1.07972e+20
	32	1.08048e+20	1.1994e+20		32	1.09876e+20	1.20788e+20		32	9.29921e+19	1.13429e+20
	33	1.03974e+20	1.25807e+20		33	1.05674e+20	1.26555e+20		33	8.94554e+19	1.18916e+20
	34	9.99197e+19	1.3164e+20		34	1.01509e+20	1.3232e+20		34	8.58904e+19	1.2429e+20
	35	9.59471e+19	1.37395e+20		35	9.73976e+19	1.38047e+20		35	8.23795e+19	1.29704e+20
	36	9.18923e+19	1.43216e+20		36	9.32871e+19	1.43793e+20		36	7.89162e+19	1.35072e+20
	37	8.79245e+19	1.48908e+20		37	8.9177e+19	1.49448e+20		37	7.54487e+19	1.4037e+20
	38	8.39685e+19	1.54669e+20		38	8.51505e+19	1.55148e+20		38	7.20049e+19	1.4569e+20
	39	8.00503e+19	1.60361e+20		39	8.11686e+19	1.60789e+20		39	6.86114e+19	1.50901e+20
	40	7.6119e+19	1.66042e+20		40	7.71734e+19	1.66407e+20		40	6.52177e+19	1.56116e+20
	41	7.22629e+19	1.71698e+20		41	7.31921e+19	1.72005e+20		41	6.19046e+19	1.6133e+20
	42	6.83851e+19	1.77292e+20		42	6.92803e+19	1.7764e+20		42	5.85559e+19	1.66507e+20
	43	6.45455e+19	1.82894e+20		43	6.5364e+19	1.83155e+20		43	5.5247e+19	1.71614e+20
	44	6.07725e+19	1.8845e+20		44	6.14799e+19	1.88657e+20		44	5.19764e+19	1.76715e+20
	45	5.69847e+19	1.93993e+20		45	5.7634e+19	1.94159e+20		45	4.87147e+19	1.81785e+20
	46	5.31729e+19	1.99518e+20		46	5.38047e+19	1.99645e+20		46	4.54874e+19	1.86815e+20
	47	4.94414e+19	2.0503e+20		47	4.99726e+19	2.05133e+20		47	4.22493e+19	1.91779e+20
	48	4.57002e+19	2.10514e+20		48	4.62059e+19	2.10514e+20		48	3.90635e+19	1.96756e+20
	49	4.19778e+19	2.15977e+20		49	4.24527e+19	2.15944e+20		49	3.58753e+19	2.0168e+20
	50	3.82758e+19	2.21407e+20		50	3.86523e+19	2.21286e+20		50	3.27036e+19	2.06586e+20
	51	3.45488e+19	2.26804e+20		51	3.49416e+19	2.26658e+20		51	2.95732e+19	2.11442e+20
	52	3.08946e+19	2.32222e+20		52	3.12146e+19	2.31998e+20		52	2.63959e+19	2.16353e+20
	53	2.72426e+19	2.37614e+20		53	2.7512e+19	2.37332e+20		53	2.33152e+19	2.21136e+20
	54	2.35867e+19	2.42934e+20		54	2.38046e+19	2.42641e+20		54	2.017e+19	2.25923e+20
	55	1.99184e+19	2.48262e+20		55	2.01095e+19	2.47855e+20		55	1.70691e+19	2.30676e+20
	56	1.63109e+19	2.53562e+20		56	1.64674e+19	2.53161e+20		56	1.39754e+19	2.35417e+20
	57	1.26697e+19	2.58892e+20		57	1.28057e+19	2.58393e+20		57	1.08893e+19	2.40103e+20
	58	9.02308e+18	2.64153e+20		58	9.10886e+18	2.6362e+20		58	7.77694e+18	2.44828e+20
	59	5.41048e+18	2.69449e+20		59	5.48542e+18	2.68881e+20		59	4.66279e+18	2.49491e+20
	60	1.81082e+18	2.74694e+20		60	1.82707e+18	2.74098e+20		60	1.56159e+18	2.54167e+20
10x	1	1.77372e+20	0		1	1.91799e+20	1.0836e+16		1	1.62787e+20	6020000000000000
	2	1.77474e+20	0		2	1.91833e+20	9331000000000000		2	1.62805e+20	5719000000000000
	3	1.77726e+20	0		3	1.91822e+20	1.1438e+16		3	1.62829e+20	5418000000000000
	4	1.78159e+20	0		4	1.91869e+20	8428000000000000		4	1.62848e+20	6020000000000000
	5	1.78709e+20	0		5	1.91862e+20	1.0535e+16		5	1.62841e+20	7224000000000000
	6	1.79475e+20	0		6	1.91815e+20	8729000000000000		6	1.62855e+20	6321000000000000
	7	1.80437e+20	0		7	1.91841e+20	1.2642e+16		7	1.62854e+20	3913000000000000
	8	1.81638e+20	0		8	1.91828e+20	1.2341e+16		8	1.62857e+20	6321000000000000
	9	1.83202e+20	0		9	1.91762e+20	9632000000000000		9	1.62869e+20	6923000000000000
	10	1.85327e+20	0		10	1.91771e+20	1.4147e+16		10	1.62857e+20	8428000000000000
	11	1.86049e+20	0		11	1.91734e+20	1.3545e+16		11	1.62849e+20	1.0234e+16
	12	1.86048e+20	0		12	1.91706e+20	1.9866e+16		12	1.62881e+20	1.1438e+16
	13	1.86047e+20	0		13	1.91693e+20	2.0167e+16		13	1.62865e+20	1.2341e+16
	14	1.86044e+20	0		14	1.91601e+20	2.5585e+16		14	1.62871e+20	1.1739e+16
	15	1.86042e+20	0		15	1.91534e+20	3.1304e+16		15	1.62869e+20	1.9264e+16
	16	1.86046e+20	0		16	1.914e+20	4.5451e+16		16	1.62867e+20	2.6187e+16
	17	1.85986e+20	9.6922e+16		17	1.90923e+20	5.38489e+17		17	1.6278e+20	1.20099e+17
	18	1.83549e+20	3.63758e+18		18	1.88231e+20	4.23326e+18		18	1.60757e+20	3.11174e+18
	19	1.7862e+20	1.07009e+19		19	1.83066e+20	1.12764e+19		19	1.56457e+20	9.59076e+18
	20	1.71387e+20	2.11642e+19		20	1.75481e+20	2.17048e+19		20	1.49769e+20	1.95984e+19
	21	1.67356e+20	2.709e+19		21	1.70065e+20	2.8896e+19		21	1.45684e+20	2.4682e+19
	22	1.61762e+20	3.48751e+19		22	1.65412e+20	3.53428e+19		22	1.41131e+20	3.24613e+19
	23	1.57364e+20	4.11882e+19		23	1.60943e+20	4.15461e+19		23	1.37243e+20	3.82734e+19
	24	1.52943e+20	4.73885e+19		24	1.56435e+20	4.77214e+19		24	1.3334e+20	4.41251e+19
	25	1.48616e+20	5.36508e+19		25	1.51846e+20	5.38995e+19		25	1.29525e+20	4.99684e+19
	26	1.44221e+20	5.98794e+19		26	1.47302e+20	6.00459e+19		26	1.25666e+20	5.5719e+19
	27	1.3989e+20	6.61168e+19		27	1.42797e+20	6.62122e+19		27	1.21844e+20	6.14789e+19
	28	1.35551e+20	7.23417e+19		28	1.38336e+20	7.23607e+19		28	1.17983e+20	6.7269e+19
	29	1.31216e+20	7.85252e+19		29	1.33834e+20	7.85162e+19		29	1.1416e+20	7.30151e+19
	30	1.269e+20	8.4764e+19		30	1.29366e+20	8.46812e+19		30	1.10348e+20	7.87696e+19
	31	1.2258e+20	9.0958e+19		31	1.24906e+20	9.07912e+19		31	1.0657e+20	8.44847e+19
	32	1.18262e+20	9.71008e+19		32	1.20456e+20	9.69079e+19		32	1.02792e+20	9.01995e+19
	33	1.13984e+20	1.03254e+20		33	1.16045e+20	1.02995e+20		33	9.9023e+19	9.59127e+19
	34	1.09689e+20	1.0942e+20		34	1.1167e+20	1.09122e+20		34	9.52475e+19	1.0157e+20
	35	1.05401e+20	1.15598e+20		35	1.07248e+20	1.15132e+20		35	9.15218e+19	1.07247e+20
	36	1.01141e+20	1.21725e+20		36	1.02883e+20	1.2124e+20		36	8.77906e+19	1.12871e+20
	37	9.69136e+19	1.27864e+20		37	9.85158e+19	1.27296e+20		37	8.40768e+19	1.1855e+20
	38	9.26716e+19	1.33944e+20		38	9.42169e+19	1.33342e+20		38	8.03628e+19	1.24138e+20
	39	8.84443e+19	1.40053e+20		39	8.98774e+19	1.3936e+20		39	7.66704e+19	1.29737e+20
	40	8.42574e+19	1.46123e+20		40	8.55939e+19	1.45388e+20		40	7.3041e+19	1.35327e+20
	41	8.00278e+19	1.52208e+20		41	8.12902e+19	1.5143e+20		41	6.93378e+19	1.40857e+20
	42	7.58586e+19	1.58256e+20		42	7.69976e+19	1.57362e+20		42	6.57164e+19	1.46444e+20
	43	7.16835e+19	1.64333e+20		43	7.27303e+19	1.63374e+20		43	6.20987e+19	1.51914e+20
	44	6.75083e+19	1.70304e+20		44	6.84853e+19	1.69331e+20		44	5.84759e+19	1.57452e+20
	45	6.33617e+19	1.76374e+20		45	6.42421e+19	1.75271e+20		45	5.48582e+19	1.6295e+20
	46	5.92332e+19	1.82378e+20		46	6.00739e+19	1.81229e+20		46	5.12889e+19	1.68434e+20
	47	5.51056e+19	1.88368e+20		47	5.58521e+19	1.87155e+20		47	4.76992e+19	1.73867e+20
	48	5.09617e+19	1.94358e+20		48	5.16332e+19	1.93076e+20		48	4.41076e+19	1.7932e+20
	49	4.68549e+19	2.00348e+20		49	4.7493e+19	1.99025e+20		49	4.05661e+19	1.84749e+20
	50	4.27601e+19	2.06299e+20		50	4.33085e+19	2.04881e+20		50	3.70305e+19	1.901e+20
	51	3.86734e+19	2.12234e+20		51	3.91553e+19	2.1077e+20		51	3.34841e+19	1.9554e+20
	52	3.45708e+19	2.1819e+20		52	3.50054e+19	2.16643e+20		52	2.99528e+19	2.00922e+20
	53	3.04675e+19	2.24111e+20		53	3.0848e+19	2.225e+20		53	2.64182e+19	2.06252e+20
	54	2.64242e+19	2.3005e+20		54	2.67529e+19	2.28352e+20		54	2.28944e+19	2.11598e+20
	55	2.2327e+19	2.35945e+20		55	2.25729e+19	2.34225e+20		55	1.93396e+19	2.16933e+20
	56	1.82749e+19	2.41847e+20		56	1.84636e+19	2.40108e+20		56	1.58302e+19	2.2222e+20
	57	1.42102e+19	2.47752e+20		57	1.4386e+19	2.45857e+20		57	1.23449e+19	2.27556e+20
	58	1.01341e+19	2.53632e+20		58	1.02749e+19	2.51738e+20		58	8.82532e+18	2.32869e+20
	59	6.08592e+18	2.59551e+20		59	6.16869e+18	2.57548e+20		59	5.30422e+18	2.38098e+20
	60	2.01369e+18	2.65419e+20		60	2.0754e+18	2.63382e+20		60	1.79998e+18	2.43431e+20
25x	1	1.72833e+20	0		1	1.86918e+20	3913000000000000		1	1.56337e+20	2709000000000000
	2	1.72904e+20	0		2	1.86896e+20	2107000000000000		2	1.56397e+20	2107000000000000
	3	1.73017e+20	0		3	1.86894e+20	5418000000000000		3	1.56373e+20	3612000000000000
	4	1.73235e+20	0		4	1.86939e+20	5719000000000000		4	1.56409e+20	3612000000000000
	5	1.7352e+20	0		5	1.86949e+20	2709000000000000		5	1.56408e+20	2107000000000000
	6	1.73869e+20	0		6	1.87001e+20	1806000000000000		6	1.56528e+20	2408000000000000
	7	1.7427e+20	0		7	1.86952e+20	5719000000000000		7	1.56553e+20	3612000000000000
	8	1.74854e+20	0		8	1.87002e+20	1806000000000000		8	1.56569e+20	2408000000000000
	9	1.75652e+20	0		9	1.87101e+20	3913000000000000		9	1.56576e+20	3612000000000000
	10	1.76608e+20	0		10	1.87219e+20	4214000000000000		10	1.56634e+20	2709000000000000
	11	1.77834e+20	0		11	1.87404e+20	5418000000000000		11	1.5667e+20	3612000000000000
	12	1.79436e+20	0		12	1.8746e+20	4515000000000000		12	1.56757e+20	2709000000000000
	13	1.81516e+20	0		13	1.87586e+20	3311000000000000		13	1.56846e+20	4214000000000000
	14	1.81641e+20	0		14	1.87699e+20	3010000000000000		14	1.56931e+20	5719000000000000
	15	1.81638e+20	0		15	1.87797e+20	5418000000000000		15	1.57034e+20	3010000000000000
	16	1.81634e+20	0		16	1.8786e+20	7525000000000000		16	1.57096e+20	3913000000000000
	17	1.81632e+20	0		17	1.87979e+20	1.0535e+16		17	1.57132e+20	7224000000000000
	18	1.81631e+20	0		18	1.88033e+20	1.4147e+16		18	1.57221e+20	9632000000000000
	19	1.81651e+20	0		19	1.87832e+20	2.7993e+16		19	1.57315e+20	1.9264e+16
	20	1.77907e+20	5.43064e+18		20	1.83515e+20	5.4171e+18		20	1.54204e+20	4.71216e+18
	21	1.73978e+20	1.1739e+19		21	1.75784e+20	1.2943e+19		21	1.49296e+20	9.933e+18
	22	1.68188e+20	1.94979e+19		22	1.73185e+20	1.91623e+19		22	1.45563e+20	1.7747e+19
	23	1.63735e+20	2.5886e+19		23	1.68479e+20	2.54164e+19		23	1.41733e+20	2.35767e+19
	24	1.59346e+20	3.22425e+19		24	1.63824e+20	3.16809e+19		24	1.37871e+20	2.94083e+19
	25	1.54917e+20	3.86072e+19		25	1.59128e+20	3.79022e+19		25	1.34012e+20	3.53239e+19
	26	1.50472e+20	4.49953e+19		26	1.54491e+20	4.41564e+19		26	1.30164e+20	4.11419e+19
	27	1.46075e+20	5.13533e+19		27	1.49784e+20	5.04211e+19		27	1.26322e+20	4.69578e+19
	28	1.41645e+20	5.77598e+19		28	1.4515e+20	5.66792e+19		28	1.22435e+20	5.28237e+19
	29	1.37225e+20	6.40838e+19		29	1.40516e+20	6.28903e+19		29	1.1857e+20	5.86378e+19
	30	1.32811e+20	7.04295e+19		30	1.35923e+20	6.91409e+19		30	1.14789e+20	6.44269e+19
	31	1.2842e+20	7.68206e+19		31	1.31268e+20	7.53827e+19		31	1.1093e+20	7.02781e+19
	32	1.23995e+20	8.31696e+19		32	1.26669e+20	8.16363e+19		32	1.07105e+20	7.61166e+19
	33	1.19601e+20	8.9561e+19		33	1.22107e+20	8.78538e+19		33	1.03281e+20	8.19159e+19
	34	1.15205e+20	9.59227e+19		34	1.17534e+20	9.41043e+19		34	9.94835e+19	8.76614e+19
	35	1.10809e+20	1.02258e+20		35	1.1297e+20	1.003e+20		35	9.5665e+19	9.3506e+19
	36	1.06397e+20	1.08579e+20		36	1.08414e+20	1.0649e+20		36	9.18495e+19	9.92307e+19
	37	1.02013e+20	1.14936e+20		37	1.03874e+20	1.12721e+20		37	8.80536e+19	1.05047e+20
	38	9.76501e+19	1.2126e+20		38	9.93469e+19	1.18934e+20		38	8.42436e+19	1.10787e+20
	39	9.32335e+19	1.27598e+20		39	9.48553e+19	1.25091e+20		39	8.04733e+19	1.166e+20
	40	8.88651e+19	1.33935e+20		40	9.03388e+19	1.31336e+20		40	7.66587e+19	1.22319e+20
	41	8.4488e+19	1.40241e+20		41	8.58289e+19	1.37517e+20		41	7.28938e+19	1.28066e+20
	42	8.01533e+19	1.46581e+20		42	8.13726e+19	1.43723e+20		42	6.91225e+19	1.33775e+20
	43	7.57476e+19	1.529e+20		43	7.69031e+19	1.49844e+20		43	6.53597e+19	1.39492e+20
	44	7.13764e+19	1.59202e+20		44	7.24513e+19	1.56062e+20		44	6.16111e+19	1.45182e+20
	45	6.70493e+19	1.65541e+20		45	6.79899e+19	1.6227e+20		45	5.78615e+19	1.50908e+20
	46	6.26914e+19	1.71807e+20		46	6.35432e+19	1.68387e+20		46	5.41029e+19	1.56575e+20
	47	5.83675e+19	1.78082e+20		47	5.91339e+19	1.74552e+20		47	5.03438e+19	1.62306e+20
	48	5.39831e+19	1.84382e+20		48	5.47257e+19	1.80707e+20		48	4.66132e+19	1.6793e+20
	49	4.96614e+19	1.90668e+20		49	5.03122e+19	1.86839e+20		49	4.28621e+19	1.73566e+20
	50	4.53664e+19	1.96916e+20		50	4.59097e+19	1.92994e+20		50	3.9142e+19	1.79257e+20
	51	4.10064e+19	2.03241e+20		51	4.14856e+19	1.99133e+20		51	3.54334e+19	1.84847e+20
	52	3.66913e+19	2.09495e+20		52	3.71175e+19	2.0529e+20		52	3.17019e+19	1.90476e+20
	53	3.23638e+19	2.15783e+20		53	3.27569e+19	2.11394e+20		53	2.79406e+19	1.96154e+20
	54	2.80556e+19	2.2208e+20		54	2.83572e+19	2.1753e+20		54	2.42377e+19	2.01765e+20
	55	2.37068e+19	2.28273e+20		55	2.39743e+19	2.23677e+20		55	2.05339e+19	2.07387e+20
	56	1.93868e+19	2.34588e+20		56	1.96156e+19	2.29825e+20		56	1.67886e+19	2.12992e+20
	57	1.51066e+19	2.40854e+20		57	1.52637e+19	2.35936e+20		57	1.30757e+19	2.18594e+20
	58	1.07996e+19	2.47095e+20		58	1.08845e+19	2.42086e+20		58	9.34003e+18	2.24232e+20
	59	6.46398e+18	2.53396e+20		59	6.52839e+18	2.48206e+20		59	5.5989e+18	2.29837e+20
	60	2.16479e+18	2.59694e+20		60	2.16268e+18	2.54348e+20		60	1.90533e+18	2.35426e+20

## Sheet: Fig 3b
PD17-20
1x	Scenario 3 (no electron trapping)				Scenario 1				Scenario 2
	position	I3-	I-		position	I3-	I-		position	I3-	I-
	um				um				um
	1	7.4793e+19	2.31948e+20		1	7.4769e+19	2.31945e+20		1	7.1919e+19	2.31804e+20
	2	7.4622e+19	2.32203e+20		2	7.4589e+19	2.32221e+20		2	7.176e+19	2.32071e+20
	3	7.4217e+19	2.3277e+20		3	7.4232e+19	2.3274e+20		3	7.1409e+19	2.3265e+20
	4	7.3725e+19	2.33559e+20		4	7.3701e+19	2.33568e+20		4	7.0893e+19	2.33406e+20
	5	7.3122e+19	2.34561e+20		5	7.3032e+19	2.34681e+20		5	7.023e+19	2.3448e+20
	6	7.2156e+19	2.36043e+20		6	7.2138e+19	2.35989e+20		6	6.9453e+19	2.3589e+20
	7	7.1142e+19	2.37657e+20		7	7.1145e+19	2.37582e+20		7	6.8406e+19	2.37498e+20
	8	6.9921e+19	2.3949e+20		8	6.9924e+19	2.39526e+20		8	6.726e+19	2.39394e+20
	9	6.8541e+19	2.41545e+20		9	6.8532e+19	2.41671e+20		9	6.5973e+19	2.41548e+20
	10	6.6966e+19	2.4405e+20		10	6.6873e+19	2.44128e+20		10	6.4431e+19	2.43888e+20
	11	6.5166e+19	2.46687e+20		11	6.5154e+19	2.46804e+20		11	6.2646e+19	2.4663e+20
	12	6.3285e+19	2.49738e+20		12	6.3177e+19	2.49744e+20		12	6.0885e+19	2.4954e+20
	13	6.1179e+19	2.52975e+20		13	6.1167e+19	2.5287e+20		13	5.886e+19	2.5278e+20
	14	5.8848e+19	2.5635e+20		14	5.8998e+19	2.56464e+20		14	5.6766e+19	2.56353e+20
	15	5.6457e+19	2.60271e+20		15	5.6547e+19	2.60226e+20		15	5.4429e+19	2.60112e+20
	16	5.3943e+19	2.64234e+20		16	5.3856e+19	2.64153e+20		16	5.1807e+19	2.64183e+20
	17	5.0958e+19	2.68644e+20		17	5.1069e+19	2.68431e+20		17	4.9107e+19	2.68338e+20
	18	4.8009e+19	2.7318e+20		18	4.8123e+19	2.7297e+20		18	4.6188e+19	2.72919e+20
	19	4.4784e+19	2.77938e+20		19	4.5e+19	2.77902e+20		19	4.3227e+19	2.77857e+20
	20	4.1688e+19	2.82939e+20		20	4.1514e+19	2.82954e+20		20	3.9834e+19	2.8299e+20
	21	3.9e+19	2.85e+20		21	4.2e+19	2.85e+20		21	3.6e+19	2.88e+20
	22	3.8094e+19	2.8842e+20		22	3.8073e+19	2.88366e+20		22	3.6579e+19	2.88369e+20
	23	3.7443e+19	2.89398e+20		23	3.7323e+19	2.89509e+20		23	3.5901e+19	2.89416e+20
	24	3.681e+19	2.90331e+20		24	3.6714e+19	2.90391e+20		24	3.5268e+19	2.90439e+20
	25	3.624e+19	2.91267e+20		25	3.6174e+19	2.91333e+20		25	3.4674e+19	2.91315e+20
	26	3.5649e+19	2.92077e+20		26	3.5505e+19	2.92275e+20		26	3.4122e+19	2.92254e+20
	27	3.5013e+19	2.93049e+20		27	3.4971e+19	2.93118e+20		27	3.354e+19	2.93145e+20
	28	3.4473e+19	2.93919e+20		28	3.4371e+19	2.93967e+20		28	3.2991e+19	2.94012e+20
	29	3.3936e+19	2.94894e+20		29	3.378e+19	2.94852e+20		29	3.2382e+19	2.94888e+20
	30	3.3378e+19	2.95644e+20		30	3.3225e+19	2.958e+20		30	3.1833e+19	2.95785e+20
	31	3.2829e+19	2.96547e+20		31	3.2682e+19	2.96694e+20		31	3.1323e+19	2.96688e+20
	32	3.231e+19	2.97429e+20		32	3.2124e+19	2.97618e+20		32	3.0783e+19	2.97528e+20
	33	3.1734e+19	2.9835e+20		33	3.1632e+19	2.98395e+20		33	3.0282e+19	2.98377e+20
	34	3.1104e+19	2.99145e+20		34	3.0978e+19	2.99355e+20		34	2.9739e+19	2.99316e+20
	35	3.0585e+19	3.00093e+20		35	3.0423e+19	3.00153e+20		35	2.9271e+19	3.00129e+20
	36	3.0054e+19	3.00912e+20		36	2.9916e+19	3.01035e+20		36	2.8716e+19	3.00963e+20
	37	2.9547e+19	3.018e+20		37	2.9364e+19	3.01929e+20		37	2.8125e+19	3.01926e+20
	38	2.8992e+19	3.02712e+20		38	2.8827e+19	3.0279e+20		38	2.7612e+19	3.02781e+20
	39	2.8425e+19	3.03579e+20		39	2.8209e+19	3.03663e+20		39	2.7084e+19	3.03645e+20
	40	2.7894e+19	3.04464e+20		40	2.769e+19	3.04614e+20		40	2.6505e+19	3.04617e+20
	41	2.7294e+19	3.05322e+20		41	2.7096e+19	3.05535e+20		41	2.5953e+19	3.05409e+20
	42	2.6706e+19	3.06237e+20		42	2.6553e+19	3.06366e+20		42	2.5491e+19	3.06255e+20
	43	2.6232e+19	3.07089e+20		43	2.6031e+19	3.07239e+20		43	2.4963e+19	3.07173e+20
	44	2.5635e+19	3.07998e+20		44	2.5461e+19	3.08118e+20		44	2.4417e+19	3.08061e+20
	45	2.4993e+19	3.08883e+20		45	2.4957e+19	3.08994e+20		45	2.3808e+19	3.08916e+20
	46	2.4558e+19	3.09738e+20		46	2.4339e+19	3.0993e+20		46	2.3325e+19	3.09801e+20
	47	2.3901e+19	3.10605e+20		47	2.3799e+19	3.10785e+20		47	2.2803e+19	3.10659e+20
	48	2.3424e+19	3.11469e+20		48	2.3271e+19	3.11676e+20		48	2.2197e+19	3.11559e+20
	49	2.2812e+19	3.12348e+20		49	2.2752e+19	3.12513e+20		49	2.1633e+19	3.12435e+20
	50	2.2212e+19	3.13251e+20		50	2.217e+19	3.13428e+20		50	2.1129e+19	3.13332e+20
	51	2.1729e+19	3.14172e+20		51	2.1552e+19	3.14253e+20		51	2.0544e+19	3.14211e+20
	52	2.1105e+19	3.15078e+20		52	2.0985e+19	3.1515e+20		52	1.9968e+19	3.15108e+20
	53	2.0535e+19	3.15879e+20		53	2.0397e+19	3.16026e+20		53	1.9404e+19	3.1593e+20
	54	1.9941e+19	3.16833e+20		54	1.9839e+19	3.16968e+20		54	1.8807e+19	3.16884e+20
	55	1.9383e+19	3.17751e+20		55	1.9212e+19	3.17853e+20		55	1.8225e+19	3.17751e+20
	56	1.8837e+19	3.18582e+20		56	1.8657e+19	3.18723e+20		56	1.7682e+19	3.18627e+20
	57	1.8198e+19	3.1944e+20		57	1.8063e+19	3.19671e+20		57	1.7148e+19	3.19497e+20
	58	1.7685e+19	3.20385e+20		58	1.7418e+19	3.20526e+20		58	1.6533e+19	3.20421e+20
	59	1.7103e+19	3.21165e+20		59	1.6917e+19	3.21369e+20		59	1.5978e+19	3.21303e+20
	60	1.653e+19	3.21987e+20		60	1.6287e+19	3.22254e+20		60	1.5342e+19	3.22254e+20
5x	1	2.1549e+20	0		1	2.10294e+20	1.2e+16		1	2.01645e+20	1.2e+16
	2	2.15496e+20	0		2	2.10756e+20	1.8e+16		2	2.02131e+20	3000000000000000
	3	2.15505e+20	0		3	2.11617e+20	1.5e+16		3	2.02989e+20	1.2e+16
	4	2.1528e+20	3.72e+17		4	2.13444e+20	1.5e+16		4	2.04483e+20	3e+16
	5	2.1423e+20	2.157e+18		5	2.15922e+20	1.14e+17		5	2.07e+20	3.9e+16
	6	2.1216e+20	5.259e+18		6	2.14725e+20	2.889e+18		6	2.06457e+20	2.469e+18
	7	2.09325e+20	9.825e+18		7	2.11743e+20	7.593e+18		7	2.03601e+20	6.783e+18
	8	2.05404e+20	1.5381e+19		8	2.07756e+20	1.3455e+19		8	1.99827e+20	1.2567e+19
	9	2.00829e+20	2.2575e+19		9	2.0292e+20	2.0814e+19		9	1.95246e+20	1.9416e+19
	10	1.95465e+20	3.1221e+19		10	1.97202e+20	2.9508e+19		10	1.8984e+20	2.8155e+19
	11	1.88943e+20	4.0755e+19		11	1.905e+20	3.9093e+19		11	1.83516e+20	3.789e+19
	12	1.81437e+20	5.1843e+19		12	1.83075e+20	5.0511e+19		12	1.76256e+20	4.8924e+19
	13	1.73052e+20	6.4578e+19		13	1.74648e+20	6.3117e+19		13	1.68255e+20	6.1386e+19
	14	1.63821e+20	7.8324e+19		14	1.65153e+20	7.7112e+19		14	1.59513e+20	7.4997e+19
	15	1.53945e+20	9.3699e+19		15	1.55124e+20	9.2427e+19		15	1.49361e+20	9.0333e+19
	16	1.43043e+20	1.10085e+20		16	1.44237e+20	1.0881e+20		16	1.38873e+20	1.06659e+20
	17	1.314e+20	1.27779e+20		17	1.32216e+20	1.26507e+20		17	1.27074e+20	1.24299e+20
	18	1.18542e+20	1.46349e+20		18	1.194e+20	1.46067e+20		18	1.14576e+20	1.43616e+20
	19	1.04943e+20	1.67037e+20		19	1.05666e+20	1.66365e+20		19	1.01235e+20	1.63929e+20
	20	9.0705e+19	1.89132e+20		20	9.1254e+19	1.88313e+20		20	8.7e+19	1.85937e+20
	21	8.7e+19	2.01e+20		21	8.1e+19	2.04e+20		21	7.8e+19	1.95e+20
	22	7.5297e+19	2.12073e+20		22	7.5597e+19	2.11611e+20		22	7.1979e+19	2.08806e+20
	23	7.2693e+19	2.15802e+20		23	7.2984e+19	2.15406e+20		23	6.9243e+19	2.12637e+20
	24	7.0365e+19	2.19684e+20		24	7.0569e+19	2.19027e+20		24	6.6978e+19	2.16321e+20
	25	6.7911e+19	2.22936e+20		25	6.8058e+19	2.22693e+20		25	6.4641e+19	2.19801e+20
	26	6.5661e+19	2.26587e+20		26	6.573e+19	2.26167e+20		26	6.2265e+19	2.23413e+20
	27	6.333e+19	2.29917e+20		27	6.3432e+19	2.29692e+20		27	6.0126e+19	2.26746e+20
	28	6.1077e+19	2.334e+20		28	6.1218e+19	2.33082e+20		28	5.7951e+19	2.30181e+20
	29	5.8812e+19	2.36781e+20		29	5.8959e+19	2.36367e+20		29	5.5839e+19	2.33547e+20
	30	5.664e+19	2.40084e+20		30	5.6814e+19	2.3979e+20		30	5.3676e+19	2.36889e+20
	31	5.439e+19	2.43432e+20		31	5.4612e+19	2.43108e+20		31	5.1543e+19	2.40039e+20
	32	5.2344e+19	2.46735e+20		32	5.2458e+19	2.46249e+20		32	4.9485e+19	2.43252e+20
	33	5.0256e+19	2.49981e+20		33	5.0319e+19	2.49753e+20		33	4.755e+19	2.46426e+20
	34	4.8177e+19	2.53131e+20		34	4.8213e+19	2.52798e+20		34	4.5459e+19	2.49591e+20
	35	4.6152e+19	2.56263e+20		35	4.614e+19	2.56047e+20		35	4.3587e+19	2.52774e+20
	36	4.4136e+19	2.5938e+20		36	4.4142e+19	2.59149e+20		36	4.1649e+19	2.55738e+20
	37	4.2108e+19	2.62596e+20		37	4.2135e+19	2.62257e+20		37	3.9582e+19	2.58996e+20
	38	4.0008e+19	2.65644e+20		38	4.0119e+19	2.65356e+20		38	3.7773e+19	2.61975e+20
	39	3.8118e+19	2.68701e+20		39	3.8079e+19	2.68398e+20		39	3.5934e+19	2.64948e+20
	40	3.6156e+19	2.71818e+20		40	3.6117e+19	2.7144e+20		40	3.3933e+19	2.6787e+20
	41	3.4131e+19	2.74707e+20		41	3.4167e+19	2.74536e+20		41	3.2172e+19	2.70816e+20
	42	3.2298e+19	2.77791e+20		42	3.2346e+19	2.77602e+20		42	3.0309e+19	2.73696e+20
	43	3.0492e+19	2.80656e+20		43	3.0453e+19	2.80611e+20		43	2.8497e+19	2.76618e+20
	44	2.8467e+19	2.83653e+20		44	2.841e+19	2.83437e+20		44	2.6751e+19	2.79366e+20
	45	2.6772e+19	2.86602e+20		45	2.6652e+19	2.86491e+20		45	2.4939e+19	2.82246e+20
	46	2.4756e+19	2.89521e+20		46	2.4786e+19	2.89158e+20		46	2.3235e+19	2.84994e+20
	47	2.2977e+19	2.9229e+20		47	2.2992e+19	2.92029e+20		47	2.1471e+19	2.8773e+20
	48	2.1174e+19	2.95116e+20		48	2.1234e+19	2.95047e+20		48	1.9854e+19	2.904e+20
	49	1.9389e+19	2.97888e+20		49	1.9326e+19	2.97741e+20		49	1.8114e+19	2.93127e+20
	50	1.758e+19	3.00768e+20		50	1.7652e+19	3.00525e+20		50	1.6536e+19	2.95812e+20
	51	1.5816e+19	3.03531e+20		51	1.5879e+19	3.03324e+20		51	1.4739e+19	2.98353e+20
	52	1.4133e+19	3.06168e+20		52	1.4058e+19	3.06024e+20		52	1.3164e+19	3.01107e+20
	53	1.2261e+19	3.08892e+20		53	1.2339e+19	3.08811e+20		53	1.1505e+19	3.0363e+20
	54	1.068e+19	3.11577e+20		54	1.053e+19	3.11361e+20		54	9.951e+18	3.06246e+20
	55	8.817e+18	3.14286e+20		55	8.871e+18	3.14052e+20		55	8.238e+18	3.08718e+20
	56	7.188e+18	3.17034e+20		56	7.221e+18	3.16536e+20		56	6.81e+18	3.11142e+20
	57	5.571e+18	3.19497e+20		57	5.526e+18	3.19215e+20		57	5.16e+18	3.13473e+20
	58	3.858e+18	3.21933e+20		58	3.891e+18	3.21981e+20		58	3.603e+18	3.15879e+20
	59	2.28e+18	3.24615e+20		59	2.313e+18	3.24306e+20		59	2.049e+18	3.18297e+20
	60	7.62e+17	3.26841e+20		60	6.72e+17	3.26811e+20		60	5.88e+17	3.20544e+20
10x	1	2.07432e+20	0		1	1.98285e+20	3000000000000000		1	1.90743e+20	0
	2	2.0742e+20	0		2	1.98234e+20	9000000100000000		2	1.90749e+20	6000000000000000
	3	2.07414e+20	0		3	1.98267e+20	6000000000000000		3	1.90863e+20	3000000000000000
	4	2.07372e+20	0		4	1.98282e+20	1.2e+16		4	1.91064e+20	6000000000000000
	5	2.07345e+20	0		5	1.98441e+20	1.5e+16		5	1.91178e+20	3000000000000000
	6	2.07282e+20	0		6	1.98573e+20	1.8e+16		6	1.91415e+20	0
	7	2.07252e+20	0		7	1.9899e+20	1.2e+16		7	1.91658e+20	3000000000000000
	8	2.07165e+20	0		8	1.9968e+20	1.5e+16		8	1.92183e+20	0
	9	2.07117e+20	0		9	2.00457e+20	2.1e+16		9	1.93236e+20	9000000100000000
	10	2.0706e+20	0		10	2.02197e+20	9000000100000000		10	1.94907e+20	6000000000000000
	11	2.05845e+20	1.761e+18		11	2.05593e+20	3.9e+16		11	1.97946e+20	2.1e+16
	12	2.02971e+20	6.15e+18		12	2.06094e+20	2.925e+18		12	1.98978e+20	2.436e+18
	13	1.98279e+20	1.323e+19		13	2.01078e+20	9.984e+18		13	1.94376e+20	9.234e+18
	14	1.91505e+20	2.31e+19		14	1.94217e+20	2.0145e+19		14	1.87938e+20	1.9164e+19
	15	1.83297e+20	3.5508e+19		15	1.85889e+20	3.2805e+19		15	1.79748e+20	3.144e+19
	16	1.73478e+20	5.0583e+19		16	1.75314e+20	4.7943e+19		16	1.6971e+20	4.6728e+19
	17	1.61337e+20	6.8418e+19		17	1.62978e+20	6.6087e+19		17	1.57947e+20	6.4434e+19
	18	1.47492e+20	8.9334e+19		18	1.49208e+20	8.655e+19		18	1.44441e+20	8.4969e+19
	19	1.31907e+20	1.12227e+20		19	1.33473e+20	1.10166e+20		19	1.28835e+20	1.07904e+20
	20	1.14597e+20	1.38162e+20		20	1.15863e+20	1.36059e+20		20	1.11903e+20	1.33509e+20
	21	1.08e+20	1.53e+20		21	1.05e+20	1.5e+20		21	9.9e+19	1.47e+20
	22	9.57e+19	1.665e+20		22	9.6609e+19	1.6485e+20		22	9.2964e+19	1.62003e+20
	23	9.2415e+19	1.71126e+20		23	9.3384e+19	1.69602e+20		23	8.9718e+19	1.66761e+20
	24	8.9601e+19	1.75647e+20		24	9.0294e+19	1.74252e+20		24	8.6718e+19	1.71159e+20
	25	8.6589e+19	1.80072e+20		25	8.7432e+19	1.78488e+20		25	8.3832e+19	1.75509e+20
	26	8.3646e+19	1.84308e+20		26	8.4483e+19	1.82865e+20		26	8.0991e+19	1.79925e+20
	27	8.0841e+19	1.88535e+20		27	8.1504e+19	1.87233e+20		27	7.809e+19	1.84113e+20
	28	7.7916e+19	1.92801e+20		28	7.8684e+19	1.91379e+20		28	7.5312e+19	1.88283e+20
	29	7.5216e+19	1.97127e+20		29	7.5888e+19	1.95648e+20		29	7.2618e+19	1.9242e+20
	30	7.2417e+19	2.01228e+20		30	7.314e+19	1.99716e+20		30	6.9861e+19	1.96506e+20
	31	6.978e+19	2.05431e+20		31	7.0437e+19	2.04129e+20		31	6.7287e+19	2.00556e+20
	32	6.7047e+19	2.09406e+20		32	6.759e+19	2.08014e+20		32	6.4587e+19	2.04522e+20
	33	6.438e+19	2.1345e+20		33	6.4953e+19	2.12088e+20		33	6.2055e+19	2.08605e+20
	34	6.1671e+19	2.17254e+20		34	6.2265e+19	2.16141e+20		34	5.9436e+19	2.12493e+20
	35	5.9115e+19	2.21301e+20		35	5.9601e+19	2.20158e+20		35	5.7021e+19	2.16552e+20
	36	5.661e+19	2.25411e+20		36	5.7111e+19	2.24139e+20		36	5.4318e+19	2.20485e+20
	37	5.4177e+19	2.29329e+20		37	5.4552e+19	2.28051e+20		37	5.1873e+19	2.24322e+20
	38	5.1588e+19	2.33139e+20		38	5.196e+19	2.3205e+20		38	4.9413e+19	2.28102e+20
	39	4.8981e+19	2.37084e+20		39	4.9356e+19	2.35863e+20		39	4.6995e+19	2.31765e+20
	40	4.6464e+19	2.40909e+20		40	4.6932e+19	2.39844e+20		40	4.452e+19	2.35596e+20
	41	4.4052e+19	2.4468e+20		41	4.4454e+19	2.43582e+20		41	4.2237e+19	2.39223e+20
	42	4.1679e+19	2.48454e+20		42	4.1799e+19	2.47356e+20		42	3.9975e+19	2.43054e+20
	43	3.9252e+19	2.51994e+20		43	3.9546e+19	2.51106e+20		43	3.7575e+19	2.46612e+20
	44	3.6723e+19	2.55795e+20		44	3.7032e+19	2.54865e+20		44	3.5286e+19	2.50245e+20
	45	3.4344e+19	2.59464e+20		45	3.4683e+19	2.58561e+20		45	3.2907e+19	2.53848e+20
	46	3.21e+19	2.63172e+20		46	3.2271e+19	2.62263e+20		46	3.0672e+19	2.57388e+20
	47	2.9688e+19	2.66931e+20		47	2.9805e+19	2.65881e+20		47	2.8347e+19	2.61033e+20
	48	2.7411e+19	2.70429e+20		48	2.7534e+19	2.69658e+20		48	2.6226e+19	2.64474e+20
	49	2.5155e+19	2.73873e+20		49	2.5185e+19	2.73192e+20		49	2.388e+19	2.67873e+20
	50	2.2797e+19	2.77509e+20		50	2.2947e+19	2.76708e+20		50	2.1786e+19	2.71263e+20
	51	2.0493e+19	2.81067e+20		51	2.0706e+19	2.80155e+20		51	1.956e+19	2.74683e+20
	52	1.8276e+19	2.84484e+20		52	1.8351e+19	2.83728e+20		52	1.7358e+19	2.77983e+20
	53	1.5897e+19	2.88054e+20		53	1.6143e+19	2.87142e+20		53	1.5282e+19	2.81562e+20
	54	1.3725e+19	2.91438e+20		54	1.3878e+19	2.90673e+20		54	1.3185e+19	2.84688e+20
	55	1.1565e+19	2.94777e+20		55	1.1688e+19	2.94042e+20		55	1.0983e+19	2.8803e+20
	56	9.384e+18	2.98134e+20		56	9.378e+18	2.97402e+20		56	8.823e+18	2.913e+20
	57	7.137e+18	3.01488e+20		57	7.26e+18	3.00828e+20		57	6.858e+18	2.94432e+20
	58	4.953e+18	3.04653e+20		58	5.106e+18	3.04173e+20		58	4.794e+18	2.97687e+20
	59	3.03e+18	3.08046e+20		59	2.979e+18	3.07365e+20		59	2.877e+18	3.00693e+20
	60	9.12e+17	3.11103e+20		60	9.3e+17	3.10512e+20		60	8.46e+17	3.03747e+20
25x	1	1.96284e+20	0		1	1.78425e+20	6000000000000000		1	1.71195e+20	3000000000000000
	2	1.96275e+20	0		2	1.7853e+20	3000000000000000		2	1.71306e+20	0
	3	1.96251e+20	0		3	1.78533e+20	0		3	1.71459e+20	0
	4	1.96227e+20	0		4	1.78767e+20	6000000000000000		4	1.71531e+20	6000000000000000
	5	1.96188e+20	0		5	1.78818e+20	9000000100000000		5	1.71753e+20	0
	6	1.96134e+20	0		6	1.78773e+20	0		6	1.71807e+20	3000000000000000
	7	1.96089e+20	0		7	1.78773e+20	9000000100000000		7	1.72074e+20	0
	8	1.96017e+20	0		8	1.79148e+20	0		8	1.72248e+20	3000000000000000
	9	1.95927e+20	0		9	1.79163e+20	0		9	1.72422e+20	3000000000000000
	10	1.95825e+20	0		10	1.79367e+20	9000000100000000		10	1.72794e+20	3000000000000000
	11	1.95732e+20	0		11	1.79391e+20	0		11	1.73238e+20	3000000000000000
	12	1.95621e+20	0		12	1.79637e+20	1.2e+16		12	1.73406e+20	0
	13	1.95453e+20	0		13	1.80522e+20	0		13	1.73973e+20	0
	14	1.95312e+20	0		14	1.81812e+20	3000000000000000		14	1.75401e+20	3000000000000000
	15	1.9518e+20	0		15	1.84278e+20	1.5e+16		15	1.77705e+20	3000000000000000
	16	1.94178e+20	1.287e+18		16	1.89444e+20	1.2e+16		16	1.82613e+20	3000000000000000
	17	1.88787e+20	9.219e+18		17	1.92414e+20	4.017e+18		17	1.86948e+20	2.946e+18
	18	1.7895e+20	2.412e+19		18	1.81707e+20	1.935e+19		18	1.7697e+20	1.7598e+19
	19	1.64352e+20	4.5765e+19		19	1.66965e+20	4.0986e+19		19	1.62717e+20	3.924e+19
	20	1.4532e+20	7.3623e+19		20	1.47744e+20	6.9294e+19		20	1.43487e+20	6.7371e+19
	21	1.35e+20	8.4e+19		21	1.38e+20	7.8e+19		21	1.29e+20	7.8e+19
	22	1.21887e+20	1.0866e+20		22	1.23999e+20	1.04706e+20		22	1.20285e+20	1.02339e+20
	23	1.18092e+20	1.14375e+20		23	1.20105e+20	1.10544e+20		23	1.16241e+20	1.08018e+20
	24	1.14366e+20	1.19781e+20		24	1.16256e+20	1.16154e+20		24	1.12704e+20	1.13538e+20
	25	1.1082e+20	1.2528e+20		25	1.1265e+20	1.2156e+20		25	1.09155e+20	1.18947e+20
	26	1.07175e+20	1.30497e+20		26	1.0887e+20	1.27047e+20		26	1.05504e+20	1.24152e+20
	27	1.03674e+20	1.35753e+20		27	1.05321e+20	1.32276e+20		27	1.01835e+20	1.29381e+20
	28	1.00068e+20	1.41066e+20		28	1.01832e+20	1.37505e+20		28	9.8412e+19	1.34655e+20
	29	9.6555e+19	1.46268e+20		29	9.8109e+19	1.42794e+20		29	9.495e+19	1.39872e+20
	30	9.3153e+19	1.51221e+20		30	9.4719e+19	1.47909e+20		30	9.1578e+19	1.45224e+20
	31	8.9703e+19	1.56396e+20		31	9.1212e+19	1.5312e+20		31	8.829e+19	1.50021e+20
	32	8.6496e+19	1.61658e+20		32	8.7765e+19	1.58367e+20		32	8.4714e+19	1.55172e+20
	33	8.3061e+19	1.66527e+20		33	8.4183e+19	1.63455e+20		33	8.1522e+19	1.60272e+20
	34	7.9689e+19	1.71543e+20		34	8.1108e+19	1.68369e+20		34	7.8231e+19	1.65042e+20
	35	7.6434e+19	1.76472e+20		35	7.7676e+19	1.73568e+20		35	7.4946e+19	1.70004e+20
	36	7.3221e+19	1.81461e+20		36	7.4511e+19	1.78596e+20		36	7.173e+19	1.74957e+20
	37	7.0017e+19	1.86492e+20		37	7.1133e+19	1.83477e+20		37	6.855e+19	1.80102e+20
	38	6.6738e+19	1.91532e+20		38	6.7791e+19	1.88286e+20		38	6.5418e+19	1.84806e+20
	39	6.3465e+19	1.96323e+20		39	6.4539e+19	1.932e+20		39	6.2313e+19	1.89429e+20
	40	6.0483e+19	2.00934e+20		40	6.1308e+19	1.98153e+20		40	5.9208e+19	1.9431e+20
	41	5.7174e+19	2.05767e+20		41	5.8026e+19	2.03184e+20		41	5.6076e+19	1.99167e+20
	42	5.4156e+19	2.10639e+20		42	5.4933e+19	2.07897e+20		42	5.3004e+19	2.03688e+20
	43	5.0979e+19	2.15376e+20		43	5.1771e+19	2.12586e+20		43	4.9881e+19	2.08386e+20
	44	4.7763e+19	2.20047e+20		44	4.8696e+19	2.17527e+20		44	4.6794e+19	2.13135e+20
	45	4.4781e+19	2.24802e+20		45	4.5564e+19	2.22288e+20		45	4.3851e+19	2.17758e+20
	46	4.1688e+19	2.29482e+20		46	4.245e+19	2.26809e+20		46	4.0908e+19	2.223e+20
	47	3.8715e+19	2.34069e+20		47	3.9393e+19	2.31693e+20		47	3.7872e+19	2.27001e+20
	48	3.5742e+19	2.38689e+20		48	3.627e+19	2.36286e+20		48	3.4854e+19	2.31489e+20
	49	3.2673e+19	2.43273e+20		49	3.3285e+19	2.40948e+20		49	3.1977e+19	2.35953e+20
	50	2.9826e+19	2.47929e+20		50	3.0282e+19	2.45694e+20		50	2.9082e+19	2.40486e+20
	51	2.6784e+19	2.5239e+20		51	2.724e+19	2.50341e+20		51	2.6238e+19	2.44959e+20
	52	2.3952e+19	2.5668e+20		52	2.4177e+19	2.54772e+20		52	2.3364e+19	2.49516e+20
	53	2.1015e+19	2.61228e+20		53	2.1294e+19	2.59314e+20		53	2.0451e+19	2.53671e+20
	54	1.809e+19	2.65716e+20		54	1.8273e+19	2.63778e+20		54	1.749e+19	2.58147e+20
	55	1.5201e+19	2.70159e+20		55	1.5417e+19	2.68161e+20		55	1.4775e+19	2.62314e+20
	56	1.2267e+19	2.74509e+20		56	1.2501e+19	2.72682e+20		56	1.2093e+19	2.66628e+20
	57	9.459e+18	2.78775e+20		57	9.591e+18	2.7708e+20		57	9.312e+18	2.70822e+20
	58	6.591e+18	2.83104e+20		58	6.852e+18	2.81433e+20		58	6.447e+18	2.75076e+20
	59	3.978e+18	2.87214e+20		59	4.032e+18	2.85708e+20		59	3.912e+18	2.79354e+20
	60	1.161e+18	2.91423e+20		60	1.314e+18	2.89827e+20		60	1.194e+18	2.83431e+20

## Sheet: Fig 3c
PD59-20
1x	Scenario 3 (no electron trapping)				Scenario 1				Scenario 2
	position	I2-	I2		position	I2-	I2		position	I2-	I2
	um				um				um
	1	2709000000000000			1	3010000000000000	301000000000000		1	3010000000000000	602000000000000
	2	2709000000000000			2	1806000000000000	602000000000000		2	1505000000000000	903000000000000
	3	2709000000000000			3	3010000000000000	0		3	3010000000000000	301000000000000
	4	1505000000000000			4	3010000000000000	301000000000000		4	2107000000000000	0
	5	1204000000000000			5	3010000000000000	301000000000000		5	2408000000000000	602000000000000
	6	2107000000000000			6	3010000000000000	301000000000000		6	1806000000000000	301000000000000
	7	2709000000000000			7	1505000000000000	301000000000000		7	602000000000000	301000000000000
	8	2408000000000000			8	2107000000000000	301000000000000		8	1806000000000000	301000000000000
	9	3010000000000000			9	2709000000000000	0		9	2107000000000000	0
	10	2709000000000000			10	1806000000000000	903000000000000		10	2709000000000000	903000000000000
	11	3010000000000000			11	3010000000000000	301000000000000		11	1505000000000000	301000000000000
	12	3010000000000000			12	3010000000000000	0		12	2408000000000000	301000000000000
	13	2709000000000000			13	2408000000000000	602000000000000		13	2107000000000000	0
	14	2107000000000000			14	1204000000000000	602000000000000		14	1806000000000000	602000000000000
	15	3010000000000000			15	1505000000000000	301000000000000		15	1204000000000000	0
	16	3010000000000000			16	2709000000000000	301000000000000		16	3010000000000000	1204000000000000
	17	3010000000000000			17	2408000000000000	301000000000000		17	2709000000000000	0
	18	3311000000000000			18	1505000000000000	301000000000000		18	2408000000000000	301000000000000
	19	2408000000000000			19	2709000000000000	301000000000000		19	1204000000000000	0
	20	2709000000000000			20	1204000000000000	0		20	3311000000000000	301000000000000
	21	0			21	0	0		21	0	0
	22	0			22	301000000000000	301000000000000		22	0	301000000000000
	23	0			23	301000000000000	602000000000000		23	0	903000000000000
	24	0			24	301000000000000	0		24	301000000000000	0
	25	301000000000000			25	301000000000000	0		25	0	602000000000000
	26	0			26	301000000000000	0		26	0	0
	27	301000000000000			27	301000000000000	0		27	0	301000000000000
	28	0			28	301000000000000	301000000000000		28	0	0
	29	0			29	0	0		29	0	602000000000000
	30	301000000000000			30	301000000000000	602000000000000		30	301000000000000	0
	31	301000000000000			31	301000000000000	0		31	301000000000000	301000000000000
	32	0			32	301000000000000	301000000000000		32	0	0
	33	301000000000000			33	301000000000000	301000000000000		33	0	0
	34	0			34	0	0		34	0	0
	35	301000000000000			35	0	0		35	301000000000000	0
	36	0			36	0	0		36	301000000000000	0
	37	301000000000000			37	301000000000000	301000000000000		37	0	0
	38	0			38	0	0		38	0	0
	39	0			39	0	0		39	301000000000000	0
	40	0			40	0	301000000000000		40	0	301000000000000
	41	0			41	0	301000000000000		41	0	301000000000000
	42	0			42	0	0		42	301000000000000	0
	43	301000000000000			43	301000000000000	0		43	301000000000000	0
	44	301000000000000			44	0	0		44	301000000000000	0
	45	301000000000000			45	301000000000000	0		45	301000000000000	0
	46	0			46	0	0		46	0	0
	47	0			47	301000000000000	0		47	301000000000000	0
	48	0			48	0	0		48	301000000000000	0
	49	301000000000000			49	0	0		49	301000000000000	301000000000000
	50	301000000000000			50	301000000000000	0		50	0	0
	51	0			51	0	0		51	301000000000000	0
	52	0			52	0	0		52	0	301000000000000
	53	0			53	301000000000000	0		53	0	301000000000000
	54	0			54	0	0		54	0	0
	55	0			55	301000000000000	0		55	0	0
	56	301000000000000			56	0	0		56	301000000000000	0
	57	0			57	0	0		57	0	0
	58	301000000000000			58	0	0		58	0	0
	59	0			59	0	0		59	0	0
	60	301000000000000			60	0	0		60	0	0
5x	1	301000000000000			1	6020000000000000	5.48211e+18		1	7826000000000000	5.42282e+18
	2	301000000000000			2	5418000000000000	5.44118e+18		2	6622000000000000	5.36924e+18
	3	301000000000000			3	6622000000000000	5.1477e+18		3	6321000000000000	5.27141e+18
	4	301000000000000			4	8127000000000000	4.97463e+18		4	9632000000000000	5.05078e+18
	5	0			5	8428000000000000	4.66851e+18		5	6622000000000000	4.73413e+18
	6	0			6	8428000000000000	4.36932e+18		6	8127000000000000	4.40122e+18
	7	0			7	7224000000000000	3.75678e+18		7	8428000000000000	3.86875e+18
	8	301000000000000			8	8428000000000000	3.31762e+18		8	8729000000000000	3.36638e+18
	9	0			9	7525000000000000	2.79629e+18		9	6622000000000000	2.79448e+18
	10	301000000000000			10	7525000000000000	2.3773e+18		10	6622000000000000	2.3785e+18
	11	301000000000000			11	6321000000000000	2.11904e+18		11	7224000000000000	2.1079e+18
	12	301000000000000			12	8428000000000000	1.61637e+18		12	1.1438e+16	1.90804e+18
	13	4214000000000000			13	6622000000000000	2.64278e+17		13	6923000000000000	6.98621e+17
	14	6321000000000000			14	5719000000000000	5.0267e+16		14	5418000000000000	6.0802e+16
	15	5117000000000000			15	5117000000000000	1.9866e+16		15	6020000000000000	1.7458e+16
	16	3010000000000000			16	6321000000000000	1.0535e+16		16	6622000000000000	9331000000000000
	17	6622000000000000			17	6020000000000000	7525000000000000		17	5719000000000000	3311000000000000
	18	5719000000000000			18	6020000000000000	5719000000000000		18	5418000000000000	2709000000000000
	19	5117000000000000			19	6622000000000000	2408000000000000		19	4816000000000000	3612000000000000
	20	5719000000000000			20	6923000000000000	1505000000000000		20	6020000000000000	1806000000000000
	21	0			21	0	0		21	0	0
	22	301000000000000			22	0	602000000000000		22	301000000000000	1505000000000000
	23	0			23	0	903000000000000		23	301000000000000	1505000000000000
	24	301000000000000			24	0	1204000000000000		24	301000000000000	1204000000000000
	25	0			25	301000000000000	1204000000000000		25	301000000000000	1204000000000000
	26	301000000000000			26	0	903000000000000		26	301000000000000	903000000000000
	27	0			27	301000000000000	602000000000000		27	0	903000000000000
	28	0			28	0	301000000000000		28	301000000000000	903000000000000
	29	301000000000000			29	301000000000000	301000000000000		29	301000000000000	903000000000000
	30	0			30	301000000000000	602000000000000		30	0	0
	31	301000000000000			31	0	602000000000000		31	301000000000000	602000000000000
	32	301000000000000			32	301000000000000	0		32	301000000000000	602000000000000
	33	301000000000000			33	301000000000000	602000000000000		33	301000000000000	301000000000000
	34	0			34	0	0		34	301000000000000	602000000000000
	35	301000000000000			35	301000000000000	602000000000000		35	0	1505000000000000
	36	301000000000000			36	301000000000000	903000000000000		36	301000000000000	0
	37	301000000000000			37	301000000000000	301000000000000		37	301000000000000	0
	38	0			38	301000000000000	0		38	301000000000000	602000000000000
	39	0			39	0	0		39	0	301000000000000
	40	301000000000000			40	301000000000000	0		40	301000000000000	0
	41	0			41	301000000000000	301000000000000		41	301000000000000	0
	42	301000000000000			42	0	301000000000000		42	0	301000000000000
	43	301000000000000			43	0	0		43	301000000000000	0
	44	301000000000000			44	301000000000000	0		44	0	301000000000000
	45	0			45	301000000000000	0		45	0	0
	46	0			46	301000000000000	0		46	0	301000000000000
	47	0			47	301000000000000	602000000000000		47	301000000000000	301000000000000
	48	301000000000000			48	0	0		48	0	0
	49	301000000000000			49	0	602000000000000		49	0	0
	50	301000000000000			50	301000000000000	0		50	301000000000000	0
	51	301000000000000			51	0	301000000000000		51	301000000000000	0
	52	0			52	0	0		52	0	0
	53	0			53	0	0		53	301000000000000	0
	54	301000000000000			54	0	0		54	0	0
	55	0			55	301000000000000	0		55	301000000000000	0
	56	301000000000000			56	301000000000000	0		56	0	0
	57	0			57	301000000000000	0		57	0	0
	58	0			58	301000000000000	0		58	0	0
	59	0			59	301000000000000	0		59	301000000000000	0
	60	301000000000000			60	0	0		60	301000000000000	0
10x	1	301000000000000			1	1.2341e+16	1.1941e+19		1	9331000000000000	1.18928e+19
	2	301000000000000			2	9331000000000000	1.17715e+19		2	9030000000000000	1.17255e+19
	3	0			3	9331000000000000	1.15581e+19		3	9933000000000000	1.15563e+19
	4	0			4	1.1137e+16	1.14431e+19		4	1.204e+16	1.14124e+19
	5	301000000000000			5	9030000000000000	1.11882e+19		5	1.204e+16	1.11864e+19
	6	0			6	1.0535e+16	1.09675e+19		6	1.1438e+16	1.10067e+19
	7	0			7	1.0535e+16	1.07535e+19		7	1.1739e+16	1.06744e+19
	8	301000000000000			8	1.3846e+16	1.01816e+19		8	1.1438e+16	1.03782e+19
	9	301000000000000			9	1.204e+16	9.89989e+18		9	1.0535e+16	9.84089e+18
	10	301000000000000			10	1.2341e+16	9.13625e+18		10	9331000000000000	9.24461e+18
	11	0			11	9632000000000000	8.17606e+18		11	8729000000000000	8.34613e+18
	12	0			12	1.2341e+16	6.98139e+18		12	1.0535e+16	7.03347e+18
	13	301000000000000			13	1.3244e+16	5.61154e+18		13	1.204e+16	5.72863e+18
	14	0			14	1.204e+16	4.54239e+18		14	9933000000000000	4.59085e+18
	15	0			15	1.2943e+16	3.70471e+18		15	1.1438e+16	3.76702e+18
	16	0			16	1.1438e+16	3.04793e+18		16	1.1137e+16	3.27428e+18
	17	9030000000000000			17	1.0535e+16	2.20332e+17		17	6321000000000000	6.25177e+17
	18	6923000000000000			18	7525000000000000	2.4983e+16		18	8729000000000000	2.1672e+16
	19	8127000000000000			19	6321000000000000	8428000000000000		19	8729000000000000	8127000000000000
	20	9030000000000000			20	6622000000000000	5418000000000000		20	9331000000000000	4816000000000000
	21	0			21	0	0		21	0	0
	22	301000000000000			22	602000000000000	2107000000000000		22	301000000000000	2107000000000000
	23	301000000000000			23	0	1806000000000000		23	301000000000000	2408000000000000
	24	301000000000000			24	301000000000000	903000000000000		24	301000000000000	2107000000000000
	25	301000000000000			25	0	2709000000000000		25	301000000000000	1806000000000000
	26	0			26	0	1806000000000000		26	0	1204000000000000
	27	301000000000000			27	301000000000000	1806000000000000		27	0	602000000000000
	28	0			28	0	602000000000000		28	0	602000000000000
	29	0			29	0	1505000000000000		29	0	903000000000000
	30	301000000000000			30	301000000000000	602000000000000		30	301000000000000	903000000000000
	31	0			31	301000000000000	1204000000000000		31	301000000000000	602000000000000
	32	0			32	0	1204000000000000		32	301000000000000	602000000000000
	33	0			33	0	301000000000000		33	0	602000000000000
	34	0			34	301000000000000	602000000000000		34	0	903000000000000
	35	0			35	301000000000000	301000000000000		35	0	903000000000000
	36	301000000000000			36	301000000000000	602000000000000		36	301000000000000	903000000000000
	37	301000000000000			37	0	0		37	0	0
	38	0			38	301000000000000	602000000000000		38	301000000000000	301000000000000
	39	0			39	301000000000000	0		39	301000000000000	301000000000000
	40	301000000000000			40	301000000000000	602000000000000		40	301000000000000	0
	41	0			41	0	602000000000000		41	0	301000000000000
	42	0			42	0	0		42	0	301000000000000
	43	301000000000000			43	301000000000000	0		43	301000000000000	602000000000000
	44	0			44	0	903000000000000		44	0	301000000000000
	45	0			45	0	0		45	301000000000000	301000000000000
	46	301000000000000			46	0	0		46	301000000000000	602000000000000
	47	301000000000000			47	301000000000000	0		47	0	602000000000000
	48	301000000000000			48	301000000000000	0		48	301000000000000	301000000000000
	49	0			49	0	0		49	0	0
	50	301000000000000			50	301000000000000	0		50	301000000000000	0
	51	301000000000000			51	0	0		51	0	0
	52	0			52	301000000000000	301000000000000		52	0	0
	53	0			53	0	301000000000000		53	0	0
	54	0			54	0	301000000000000		54	301000000000000	0
	55	0			55	301000000000000	0		55	0	0
	56	301000000000000			56	0	0		56	301000000000000	0
	57	0			57	0	0		57	301000000000000	0
	58	301000000000000			58	0	0		58	0	0
	59	0			59	0	0		59	0	301000000000000
	60	301000000000000			60	301000000000000	0		60	0	0
25x	1	0			1	1.6555e+16	2.77281e+19		1	2.0769e+16	2.77751e+19
	2	0			2	2.1672e+16	2.74897e+19		2	1.8963e+16	2.7369e+19
	3	0			3	1.806e+16	2.72185e+19		3	1.5351e+16	2.71926e+19
	4	0			4	1.8361e+16	2.69949e+19		4	1.6555e+16	2.68588e+19
	5	301000000000000			5	1.5652e+16	2.67393e+19		5	1.5953e+16	2.65539e+19
	6	0			6	1.806e+16	2.62818e+19		6	1.806e+16	2.61169e+19
	7	301000000000000			7	1.806e+16	2.59429e+19		7	1.7458e+16	2.58201e+19
	8	301000000000000			8	1.7759e+16	2.5641e+19		8	1.8361e+16	2.54754e+19
	9	0			9	1.6856e+16	2.51525e+19		9	1.9565e+16	2.50748e+19
	10	301000000000000			10	1.8963e+16	2.45487e+19		10	1.6856e+16	2.44915e+19
	11	301000000000000			11	1.7458e+16	2.39491e+19		11	1.8963e+16	2.42061e+19
	12	301000000000000			12	1.6254e+16	2.3335e+19		12	1.5953e+16	2.33067e+19
	13	301000000000000			13	2.0468e+16	2.24405e+19		13	1.6254e+16	2.24582e+19
	14	301000000000000			14	1.5351e+16	2.10998e+19		14	1.806e+16	2.11398e+19
	15	301000000000000			15	1.505e+16	1.86761e+19		15	1.6555e+16	1.88263e+19
	16	0			16	1.7759e+16	1.53417e+19		16	1.9565e+16	1.5385e+19
	17	301000000000000			17	1.5652e+16	1.12899e+19		17	1.8963e+16	1.14627e+19
	18	0			18	1.6856e+16	7.90938e+18		18	1.806e+16	7.96356e+18
	19	8729000000000000			19	1.3244e+16	3.6719e+18		19	1.4147e+16	3.47294e+18
	20	1.1137e+16			20	1.0535e+16	2.0769e+16		20	1.3244e+16	1.204e+16
	21	0			21	0	0		21	0	0
	22	0			22	0	6321000000000000		22	602000000000000	5117000000000000
	23	0			23	301000000000000	3311000000000000		23	0	2709000000000000
	24	301000000000000			24	301000000000000	3612000000000000		24	301000000000000	1204000000000000
	25	301000000000000			25	301000000000000	1806000000000000		25	301000000000000	3010000000000000
	26	301000000000000			26	0	1505000000000000		26	0	2709000000000000
	27	301000000000000			27	0	903000000000000		27	301000000000000	2709000000000000
	28	301000000000000			28	0	1806000000000000		28	301000000000000	1204000000000000
	29	0			29	301000000000000	301000000000000		29	0	301000000000000
	30	301000000000000			30	301000000000000	1806000000000000		30	0	301000000000000
	31	0			31	301000000000000	0		31	301000000000000	1204000000000000
	32	301000000000000			32	0	1505000000000000		32	0	1505000000000000
	33	301000000000000			33	301000000000000	301000000000000		33	301000000000000	1505000000000000
	34	301000000000000			34	0	903000000000000		34	0	0
	35	301000000000000			35	301000000000000	903000000000000		35	301000000000000	0
	36	0			36	301000000000000	301000000000000		36	301000000000000	0
	37	301000000000000			37	301000000000000	0		37	301000000000000	0
	38	301000000000000			38	0	0		38	301000000000000	903000000000000
	39	0			39	301000000000000	301000000000000		39	301000000000000	301000000000000
	40	301000000000000			40	301000000000000	903000000000000		40	301000000000000	602000000000000
	41	0			41	0	602000000000000		41	301000000000000	0
	42	301000000000000			42	301000000000000	0		42	301000000000000	602000000000000
	43	0			43	301000000000000	0		43	0	602000000000000
	44	0			44	0	0		44	301000000000000	0
	45	0			45	0	602000000000000		45	301000000000000	0
	46	0			46	0	602000000000000		46	301000000000000	0
	47	0			47	0	0		47	301000000000000	0
	48	0			48	0	301000000000000		48	301000000000000	0
	49	0			49	0	602000000000000		49	301000000000000	0
	50	301000000000000			50	301000000000000	0		50	0	0
	51	301000000000000			51	0	301000000000000		51	0	0
	52	301000000000000			52	0	301000000000000		52	301000000000000	0
	53	301000000000000			53	301000000000000	0		53	0	0
	54	0			54	0	0		54	0	301000000000000
	55	0			55	301000000000000	0		55	0	0
	56	0			56	301000000000000	0		56	301000000000000	0
	57	0			57	0	0		57	0	0
	58	0			58	0	0		58	0	0
	59	0			59	301000000000000	0		59	301000000000000	0
	60	301000000000000			60	301000000000000	0		60	0	0

## Sheet: Fig 3d
PD17-20
1x	Scenario 3 (no electron trapping)				Scenario 1				Scenario 2
	position	I2-	I2		position	I2-	I2		position	I2-	I2
	um				um				um
	1	0			1	3000000000000000	0		1	0	0
	2	0			2	3000000000000000	0		2	0	0
	3	3000000000000000			3	3000000000000000	0		3	3000000000000000	0
	4	0			4	0	0		4	3000000000000000	0
	5	0			5	3000000000000000	0		5	3000000000000000	0
	6	0			6	0	0		6	0	0
	7	3000000000000000			7	0	0		7	0	0
	8	3000000000000000			8	0	0		8	0	0
	9	3000000000000000			9	3000000000000000	0		9	3000000000000000	0
	10	3000000000000000			10	3000000000000000	0		10	3000000000000000	0
	11	0			11	0	0		11	0	0
	12	0			12	6000000000000000	3000000000000000		12	0	0
	13	0			13	3000000000000000	3000000000000000		13	3000000000000000	0
	14	3000000000000000			14	3000000000000000	0		14	0	0
	15	3000000000000000			15	3000000000000000	0		15	3000000000000000	0
	16	0			16	3000000000000000	0		16	0	0
	17	0			17	0	0		17	0	0
	18	6000000000000000			18	6000000000000000	0		18	0	0
	19	3000000000000000			19	3000000000000000	0		19	3000000000000000	0
	20	3000000000000000			20	0	0		20	3000000000000000	0
	21	0			21	0	0		21	0	0
	22	3000000000000000			22	0	0		22	0	0
	23	0			23	3000000000000000	0		23	0	0
	24	0			24	3000000000000000	0		24	0	0
	25	3000000000000000			25	3000000000000000	0		25	3000000000000000	0
	26	3000000000000000			26	0	0		26	3000000000000000	0
	27	0			27	0	0		27	0	0
	28	3000000000000000			28	0	0		28	0	0
	29	0			29	3000000000000000	0		29	0	0
	30	0			30	0	0		30	0	0
	31	0			31	0	0		31	0	0
	32	0			32	0	0		32	0	0
	33	3000000000000000			33	3000000000000000	0		33	0	0
	34	0			34	0	0		34	0	0
	35	0			35	0	0		35	3000000000000000	0
	36	0			36	0	0		36	0	0
	37	0			37	3000000000000000	0		37	0	0
	38	0			38	0	0		38	0	0
	39	0			39	0	0		39	0	0
	40	0			40	0	0		40	0	0
	41	0			41	3000000000000000	0		41	3000000000000000	0
	42	0			42	3000000000000000	0		42	0	0
	43	3000000000000000			43	0	0		43	0	0
	44	0			44	0	0		44	0	0
	45	3000000000000000			45	0	0		45	0	0
	46	3000000000000000			46	3000000000000000	0		46	0	0
	47	0			47	0	0		47	0	0
	48	0			48	0	0		48	0	0
	49	0			49	0	0		49	0	0
	50	0			50	0	0		50	0	0
	51	0			51	0	0		51	3000000000000000	0
	52	0			52	0	0		52	0	0
	53	0			53	3000000000000000	0		53	0	0
	54	3000000000000000			54	3000000000000000	0		54	0	0
	55	0			55	0	0		55	0	0
	56	0			56	0	0		56	0	0
	57	0			57	0	0		57	0	0
	58	0			58	0	0		58	3000000000000000	0
	59	0			59	0	0		59	0	0
	60	0			60	0	0		60	0	0
5x	1	0			1	3000000000000000	9.573e+18		1	6000000000000000	9.3e+18
	2	3000000000000000			2	0	8.907e+18		2	6000000000000000	8.577e+18
	3	0			3	3000000000000000	7.542e+18		3	3000000000000000	7.389e+18
	4	9000000100000000			4	6000000000000000	4.884e+18		4	3000000000000000	5.07e+18
	5	1.2e+16			5	3000000000000000	1.065e+18		5	0	1.533e+18
	6	0			6	3000000000000000	2.7e+16		6	3000000000000000	4.8e+16
	7	0			7	3000000000000000	6000000000000000		7	0	1.2e+16
	8	0			8	6000000000000000	3000000000000000		8	6000000000000000	6000000000000000
	9	3000000000000000			9	6000000000000000	3000000000000000		9	3000000000000000	3000000000000000
	10	3000000000000000			10	9000000100000000	3000000000000000		10	6000000000000000	9000000100000000
	11	0			11	0	0		11	3000000000000000	0
	12	0			12	0	3000000000000000		12	3000000000000000	0
	13	0			13	6000000000000000	0		13	0	6000000000000000
	14	1.5e+16			14	0	0		14	3000000000000000	0
	15	0			15	3000000000000000	0		15	3000000000000000	0
	16	3000000000000000			16	0	0		16	0	3000000000000000
	17	3000000000000000			17	6000000000000000	3000000000000000		17	3000000000000000	0
	18	0			18	6000000000000000	0		18	3000000000000000	0
	19	9000000100000000			19	6000000000000000	0		19	6000000000000000	0
	20	3000000000000000			20	3000000000000000	0		20	3000000000000000	0
	21	0			21	0	0		21	0	0
	22	0			22	3000000000000000	0		22	0	3000000000000000
	23	0			23	0	0		23	0	0
	24	0			24	3000000000000000	0		24	0	0
	25	3000000000000000			25	0	0		25	3000000000000000	0
	26	0			26	0	0		26	0	0
	27	0			27	0	0		27	0	0
	28	0			28	3000000000000000	0		28	3000000000000000	0
	29	0			29	0	0		29	0	0
	30	0			30	0	0		30	3000000000000000	0
	31	0			31	3000000000000000	0		31	0	0
	32	0			32	0	0		32	0	0
	33	0			33	0	0		33	0	0
	34	0			34	0	0		34	0	0
	35	0			35	0	0		35	3000000000000000	0
	36	3000000000000000			36	3000000000000000	0		36	0	0
	37	3000000000000000			37	3000000000000000	0		37	0	0
	38	3000000000000000			38	0	0		38	0	0
	39	0			39	0	0		39	0	0
	40	0			40	3000000000000000	0		40	0	0
	41	0			41	0	0		41	3000000000000000	0
	42	0			42	0	0		42	0	0
	43	0			43	0	0		43	0	0
	44	0			44	0	0		44	0	0
	45	0			45	0	0		45	0	0
	46	0			46	0	0		46	0	0
	47	0			47	0	0		47	0	0
	48	0			48	0	0		48	0	0
	49	0			49	0	0		49	0	0
	50	3000000000000000			50	0	0		50	0	0
	51	0			51	0	0		51	3000000000000000	0
	52	3000000000000000			52	3000000000000000	0		52	0	0
	53	0			53	0	0		53	0	0
	54	0			54	0	0		54	0	0
	55	3000000000000000			55	3000000000000000	0		55	0	0
	56	0			56	3000000000000000	0		56	0	0
	57	0			57	0	0		57	0	0
	58	3000000000000000			58	0	0		58	3000000000000000	0
	59	0			59	0	0		59	3000000000000000	0
	60	0			60	0	0		60	0	0
10x	1	0			1	1.2e+16	1.5426e+19		1	6000000000000000	1.4784e+19
	2	3000000000000000			2	1.2e+16	1.5456e+19		2	1.5e+16	1.4781e+19
	3	0			3	1.2e+16	1.5423e+19		3	1.5e+16	1.4616e+19
	4	3000000000000000			4	0	1.5273e+19		4	3000000000000000	1.4358e+19
	5	3000000000000000			5	1.2e+16	1.5e+19		5	6000000000000000	1.4163e+19
	6	3000000000000000			6	1.2e+16	1.4658e+19		6	1.5e+16	1.383e+19
	7	3000000000000000			7	2.1e+16	1.4031e+19		7	6000000000000000	1.335e+19
	8	3000000000000000			8	6000000000000000	1.2918e+19		8	3000000000000000	1.2702e+19
	9	3000000000000000			9	1.2e+16	1.1577e+19		9	6000000000000000	1.1133e+19
	10	6000000000000000			10	9000000100000000	8.64e+18		10	0	8.79e+18
	11	6000000000000000			11	9000000100000000	3.696e+18		11	1.2e+16	4.02e+18
	12	6000000000000000			12	9000000100000000	3e+16		12	9000000100000000	6000000000000000
	13	0			13	9000000100000000	1.2e+16		13	6000000000000000	9000000100000000
	14	6000000000000000			14	3000000000000000	9000000100000000		14	0	3000000000000000
	15	3000000000000000			15	6000000000000000	3000000000000000		15	9000000100000000	0
	16	0			16	9000000100000000	3000000000000000		16	6000000000000000	0
	17	3000000000000000			17	3000000000000000	3000000000000000		17	0	3000000000000000
	18	1.2e+16			18	6000000000000000	0		18	6000000000000000	0
	19	3000000000000000			19	6000000000000000	0		19	3000000000000000	0
	20	6000000000000000			20	9000000100000000	3000000000000000		20	6000000000000000	0
	21	0			21	0	0		21	0	0
	22	0			22	0	0		22	3000000000000000	0
	23	3000000000000000			23	0	0		23	0	0
	24	0			24	3000000000000000	0		24	0	0
	25	3000000000000000			25	3000000000000000	0		25	3000000000000000	0
	26	3000000000000000			26	0	0		26	0	3000000000000000
	27	3000000000000000			27	0	0		27	0	0
	28	0			28	0	0		28	3000000000000000	0
	29	3000000000000000			29	0	0		29	3000000000000000	0
	30	3000000000000000			30	0	0		30	0	0
	31	0			31	0	0		31	3000000000000000	0
	32	0			32	3000000000000000	0		32	0	0
	33	0			33	0	0		33	0	0
	34	0			34	3000000000000000	0		34	0	3000000000000000
	35	0			35	3000000000000000	3000000000000000		35	3000000000000000	0
	36	0			36	0	0		36	0	0
	37	0			37	0	0		37	3000000000000000	0
	38	3000000000000000			38	0	0		38	0	0
	39	0			39	3000000000000000	0		39	0	0
	40	3000000000000000			40	0	0		40	3000000000000000	0
	41	3000000000000000			41	0	0		41	0	0
	42	3000000000000000			42	0	0		42	0	0
	43	0			43	3000000000000000	0		43	3000000000000000	0
	44	0			44	3000000000000000	0		44	0	0
	45	0			45	0	0		45	3000000000000000	0
	46	0			46	0	0		46	0	0
	47	3000000000000000			47	3000000000000000	0		47	0	0
	48	3000000000000000			48	3000000000000000	3000000000000000		48	0	0
	49	0			49	0	0		49	0	0
	50	3000000000000000			50	0	0		50	3000000000000000	0
	51	3000000000000000			51	3000000000000000	0		51	0	0
	52	3000000000000000			52	0	0		52	3000000000000000	0
	53	3000000000000000			53	0	0		53	0	0
	54	0			54	0	0		54	0	0
	55	0			55	0	0		55	0	0
	56	0			56	0	0		56	0	0
	57	3000000000000000			57	0	0		57	0	0
	58	0			58	0	0		58	0	0
	59	0			59	0	0		59	0	0
	60	3000000000000000			60	3000000000000000	0		60	0	0
25x	1	0			1	1.2e+16	2.7987e+19		1	1.2e+16	2.7762e+19
	2	0			2	1.5e+16	2.7864e+19		2	2.1e+16	2.7501e+19
	3	3000000000000000			3	1.8e+16	2.7786e+19		3	1.8e+16	2.7261e+19
	4	3000000000000000			4	1.5e+16	2.7477e+19		4	6000000000000000	2.7192e+19
	5	3000000000000000			5	1.8e+16	2.7243e+19		5	1.5e+16	2.6844e+19
	6	3000000000000000			6	2.1e+16	2.7123e+19		6	1.8e+16	2.6667e+19
	7	3000000000000000			7	3e+16	2.7006e+19		7	3000000000000000	2.6211e+19
	8	3000000000000000			8	1.2e+16	2.6277e+19		8	1.5e+16	2.5923e+19
	9	3000000000000000			9	9000000100000000	2.5992e+19		9	1.5e+16	2.5569e+19
	10	3000000000000000			10	2.1e+16	2.5554e+19		10	2.1e+16	2.4924e+19
	11	3000000000000000			11	1.5e+16	2.5194e+19		11	1.2e+16	2.4249e+19
	12	0			12	2.7e+16	2.4522e+19		12	2.4e+16	2.3844e+19
	13	0			13	1.2e+16	2.3094e+19		13	1.2e+16	2.2893e+19
	14	3000000000000000			14	9000000100000000	2.0796e+19		14	6000000000000000	2.0628e+19
	15	6000000000000000			15	1.2e+16	1.668e+19		15	6000000000000000	1.6917e+19
	16	1.5e+16			16	9000000100000000	8.382e+18		16	2.1e+16	9.459e+18
	17	6000000000000000			17	9000000100000000	2.4e+16		17	1.5e+16	2.7e+16
	18	1.2e+16			18	1.2e+16	1.5e+16		18	1.8e+16	3000000000000000
	19	1.5e+16			19	3000000000000000	0		19	1.2e+16	0
	20	6000000000000000			20	1.8e+16	3000000000000000		20	6000000000000000	0
	21	0			21	0	0		21	0	0
	22	3000000000000000			22	0	0		22	0	0
	23	3000000000000000			23	0	3000000000000000		23	0	0
	24	0			24	0	0		24	0	0
	25	3000000000000000			25	0	0		25	0	0
	26	3000000000000000			26	0	0		26	0	0
	27	3000000000000000			27	3000000000000000	0		27	3000000000000000	0
	28	3000000000000000			28	0	0		28	0	3000000000000000
	29	3000000000000000			29	3000000000000000	3000000000000000		29	0	0
	30	0			30	3000000000000000	0		30	0	3000000000000000
	31	3000000000000000			31	0	0		31	0	0
	32	0			32	0	3000000000000000		32	0	0
	33	0			33	0	0		33	3000000000000000	0
	34	0			34	0	0		34	0	0
	35	3000000000000000			35	0	0		35	3000000000000000	3000000000000000
	36	0			36	3000000000000000	0		36	0	0
	37	0			37	0	0		37	3000000000000000	0
	38	0			38	0	0		38	0	3000000000000000
	39	0			39	0	0		39	0	0
	40	3000000000000000			40	0	0		40	3000000000000000	0
	41	3000000000000000			41	0	0		41	3000000000000000	0
	42	0			42	0	0		42	3000000000000000	0
	43	0			43	0	0		43	0	0
	44	3000000000000000			44	0	0		44	0	0
	45	3000000000000000			45	3000000000000000	0		45	3000000000000000	0
	46	3000000000000000			46	3000000000000000	0		46	0	0
	47	0			47	0	0		47	0	0
	48	3000000000000000			48	0	0		48	3000000000000000	0
	49	0			49	0	0		49	3000000000000000	0
	50	3000000000000000			50	3000000000000000	0		50	3000000000000000	0
	51	0			51	0	0		51	3000000000000000	0
	52	3000000000000000			52	0	0		52	0	0
	53	3000000000000000			53	0	0		53	0	0
	54	0			54	0	0		54	0	0
	55	0			55	0	0		55	3000000000000000	0
	56	3000000000000000			56	0	0		56	0	0
	57	0			57	3000000000000000	0		57	0	0
	58	3000000000000000			58	0	0		58	0	0
	59	0			59	0	0		59	3000000000000000	0
	60	0			60	0	0		60	3000000000000000	0

## Sheet: Fig 4 PD17 1x
time	norm Keq
0	1.00399	1.00399	1.00399	1.00399	1.00399	1.00399	1.00399	1.00399	1.00399	1.00399	1.00399	1.00399	1.00399	1.00399	1.00399	1.00399	1.00399	1.00399	1.00399	1.00399	1.00399	1.00399	1.00399	1.00399	1.00399	1.00399	1.00399	1.00399	1.00399	1.00399	1.00399	1.00399	1.00399	1.00399	1.00399	1.00399	1.00399	1.00399	1.00399	1.00399	1.00399	1.00399	1.00399	1.00399	1.00399	1.00399	1.00399	1.00399	1.00399
0.000943347	0.916507	0.916625	0.918348	0.916315	0.918613	0.917975	0.918203	0.917665	0.919133	0.920847	0.917491	0.91688	0.915768	0.917564	0.917646	0.918978	0.918877	0.916998	0.919475	0.935077	0.976505	0.989216	0.991687	0.991787	0.991918	0.991928	0.992228	0.991918	0.992118	0.992218	0.991818	0.992018	0.991918	0.0198362	0.991418	0.991418	0.991418	0.991718	0.991818	0.992618	0.991718	0.992118	0.991818	0.992018	0.991808	0.991518	0.991718	0.991718	0.991818
0.00156551	0.862357	0.8622	0.862383	0.862733	0.863157	0.862802	0.862802	0.861899	0.863806	0.864958	0.864932	0.864278	0.865827	0.866114	0.866237	0.865526	0.862586	0.866069	0.873969	0.900993	0.957387	0.980413	0.988027	0.989868	0.990438	0.990528	0.990728	0.990619	0.990419	0.990419	0.990419	0.990419	0.990219	0.989919	0.990319	0.0197962	0.990419	0.990319	0.990109	0.990319	0.019804	0.990419	0.990609	0.990219	0.990509	0.990199	0.989999	0.989919	0.990309
0.00214444	0.814757	0.815194	0.817469	0.816499	0.816842	0.81556	0.817385	0.816095	0.816918	0.815948	0.817504	0.816676	0.817781	0.819779	0.818449	0.81676	0.820714	0.82133	0.840702	0.872521	0.936938	0.019376	0.984567	0.988158	0.989248	0.989719	0.989829	0.989719	0.989719	0.989709	0.989409	0.989609	0.989719	0.989509	0.989619	0.989719	0.989699	0.989409	0.989819	0.989809	0.989899	0.989919	0.989809	0.989509	0.989909	0.989509	0.989309	0.989299	0.989709
0.0026835	0.789851	0.789449	0.785108	0.790253	0.785836	0.789718	0.788017	0.794134	0.786423	0.784969	0.789229	0.788372	0.789129	0.0157735	0.787605	0.788145	0.791568	0.800666	0.814067	0.851914	0.917182	0.960707	0.978057	0.986098	0.988049	0.988929	0.989319	0.989019	0.989319	0.989309	0.989109	0.989109	0.988999	0.989219	0.989209	0.989409	0.989319	0.0197776	0.989309	0.989409	0.989709	0.989599	0.989509	0.989509	0.989299	0.989309	0.989209	0.989109	0.989099
0.00324897	0.79234	0.791945	0.790582	0.791442	0.791048	0.79207	0.792843	0.793724	0.791551	0.789833	0.791689	0.791532	0.790844	0.791773	0.790789	0.0158508	0.797357	0.806392	0.823245	0.859732	0.908093	0.948195	0.970367	0.983608	0.987158	0.988439	0.988719	0.988809	0.988819	0.988819	0.988909	0.988899	0.988809	0.988909	0.988819	0.988819	0.988799	0.988889	0.988799	0.989009	0.989109	0.988909	0.989299	0.989009	0.988909	0.989009	0.988809	0.988899	0.988809
0.00394874	0.797097	0.795519	0.794775	0.795451	0.795668	0.79558	0.79746	0.797287	0.795535	0.794674	0.795496	0.795307	0.794825	0.795296	0.795924	0.798108	0.804609	0.815399	0.835944	0.86785	0.902496	0.939505	0.963339	0.977399	0.984578	0.987239	0.988739	0.988729	0.988819	0.988709	0.988709	0.988809	0.019774	0.988799	0.988809	0.988609	0.988799	0.988799	0.988709	0.988799	0.988809	0.988809	0.988709	0.988799	0.988809	0.988799	0.988809	0.988799	0.988809
0.00514116	0.803891	0.803128	0.803277	0.803019	0.802979	0.80308	0.803467	0.804129	0.803072	0.802737	0.802898	0.802398	0.80164	0.80281	0.804193	0.808304	0.815888	0.830951	0.850561	0.87623	0.902384	0.929748	0.952644	0.970329	0.979389	0.984139	0.986649	0.988229	0.988609	0.988699	0.988599	0.988709	0.988699	0.988799	0.0197738	0.988699	0.988599	0.988799	0.988799	0.988599	0.988799	0.988799	0.988799	0.988809	0.988699	0.988799	0.988799	0.988699	0.988799
0.00621176	0.809594	0.80972	0.809425	0.809736	0.809425	0.0161847	0.809545	0.81035	0.810007	0.809788	0.809254	0.808719	0.0161778	0.809804	0.812621	0.817266	0.826949	0.842246	0.861379	0.88194	0.904075	0.924422	0.946328	0.964558	0.97458	0.981259	0.984439	0.986819	0.988309	0.988499	0.988609	0.988699	0.988599	0.988699	0.988699	0.988799	0.988699	0.988689	0.988599	0.988699	0.988799	0.988699	0.988589	0.988699	0.0197698	0.988689	0.988689	0.988699	0.988599
0.00689746	0.813337	0.813436	0.813857	0.813772	0.814133	0.813326	0.81416	0.813993	0.813892	0.813515	0.813633	0.812906	0.813592	0.814632	0.0163495	0.822873	0.834427	0.847784	0.866954	0.884612	0.0180729	0.925078	0.94525	0.959229	0.970619	0.979169	0.983959	0.986239	0.987629	0.988199	0.988499	0.988699	0.988499	0.988599	0.988699	0.988699	0.988699	0.988589	0.988699	0.988699	0.988699	0.988689	0.988589	0.988589	0.988589	0.988689	0.988699	0.988699	0.988589
0.00746851	0.817262	0.817388	0.817364	0.81695	0.816901	0.817227	0.817448	0.817196	0.816895	0.816761	0.816679	0.816815	0.817384	0.818276	0.822014	0.828479	0.839036	0.852637	0.869714	0.888092	0.90432	0.924561	0.942162	0.958215	0.969009	0.01954	0.0196508	0.985429	0.987429	0.98769	0.988499	0.988499	0.988499	0.988599	0.988699	0.988489	0.988689	0.988599	0.988689	0.988689	0.988699	0.988689	0.98858	0.988489	0.988489	0.988589	0.988699	0.988689	0.988589
0.00800493	0.820616	0.820345	0.820498	0.819975	0.820279	0.820556	0.820339	0.820473	0.82002	0.81944	0.820351	0.82074	0.820989	0.823238	0.826498	0.832013	0.843345	0.857006	0.872305	0.888751	0.905148	0.925018	0.941109	0.955911	0.967419	0.975299	0.981269	0.984939	0.986719	0.987619	0.988399	0.988399	0.988499	0.988499	0.988499	0.988589	0.988589	0.988489	0.988689	0.988599	0.988679	0.988589	0.98858	0.98858	0.988489	0.988599	0.98858	0.988589	0.988589
0.00857833	0.82319	0.823652	0.824159	0.823374	0.823704	0.824134	0.823906	0.823747	0.823057	0.823074	0.823388	0.824055	0.824432	0.82674	0.830599	0.836756	0.848022	0.861139	0.87529	0.89161	0.905448	0.924482	0.939983	0.95452	0.965115	0.973699	0.980569	0.983549	0.986329	0.987729	0.988109	0.988199	0.988399	0.988399	0.988399	0.988589	0.98847	0.98848	0.98848	0.988589	0.988489	0.988589	0.98858	0.988589	0.988389	0.98858	0.98848	0.98858	0.98858
0.00926529	0.827522	0.827995	0.827877	0.827489	0.82753	0.827818	0.828122	0.828004	0.827481	0.827153	0.827737	0.827866	0.82895	0.831444	0.835887	0.841917	0.854161	0.865991	0.879562	0.893015	0.906977	0.923326	0.938595	0.953496	0.963325	0.972719	0.978589	0.98254	0.985429	0.987329	0.987809	0.0197618	0.988309	0.988289	0.988389	0.988499	0.98838	0.98848	0.98848	0.98858	0.988589	0.98848	0.988589	0.98838	0.988489	0.0197692	0.98847	0.98848	0.98858
0.0104488	0.834596	0.834579	0.835147	0.834164	0.83441	0.834579	0.834503	0.834529	0.0166921	0.834445	0.834098	0.83591	0.837839	0.841281	0.844632	0.85132	0.8633	0.873795	0.886448	0.898389	0.907495	0.923646	0.936186	0.949894	0.960425	0.970019	0.976789	0.980459	0.984639	0.986019	0.987309	0.0197538	0.988099	0.988289	0.988299	0.988389	0.98848	0.98847	0.98848	0.98838	0.988589	0.98837	0.98828	0.98838	0.98848	0.98837	0.98837	0.98848	0.98857
0.0115614	0.840701	0.841252	0.840641	0.840344	0.840429	0.840692	0.841167	0.840921	0.84148	0.841404	0.841945	0.843681	0.844686	0.848577	0.854104	0.860811	0.870116	0.881409	0.892537	0.0180586	0.911402	0.922874	0.936198	0.947396	0.958587	0.967538	0.974109	0.979989	0.98244	0.985229	0.986419	0.987409	0.98779	0.988189	0.988289	0.988289	0.98848	0.988389	0.98838	0.98838	0.98847	0.98848	0.98818	0.98817	0.98847	0.98837	0.98837	0.98837	0.98838
0.012253	0.844772	0.844738	0.844627	0.844627	0.844253	0.844729	0.845196	0.845884	0.844931	0.845227	0.846286	0.847743	0.850639	0.854231	0.859215	0.865375	0.874776	0.885944	0.895852	0.905434	0.91173	0.923394	0.935447	0.946768	0.957454	0.966596	0.973919	0.978179	0.98133	0.985139	0.985919	0.987009	0.987699	0.987899	0.988189	0.98838	0.98838	0.98828	0.988389	0.98848	0.98827	0.98828	0.98817	0.98827	0.98827	0.98836	0.98837	0.98838	0.98837
0.0128213	0.848186	0.847913	0.847718	0.848101	0.847845	0.847818	0.848039	0.848523	0.848693	0.849149	0.85008	0.851213	0.854252	0.857983	0.861828	0.869808	0.87907	0.888974	0.897813	0.907582	0.914301	0.923233	0.93429	0.946581	0.956682	0.965483	0.972209	0.977589	0.98095	0.983839	0.985919	0.987109	0.987399	0.98778	0.988189	0.98828	0.988289	0.0197634	0.98838	0.98837	0.98827	0.98827	0.98827	0.98827	0.98817	0.98837	0.98827	0.98827	0.98826
0.0133589	0.85129	0.851127	0.85129	0.851034	0.850999	0.850896	0.851577	0.851942	0.851931	0.852268	0.854271	0.855276	0.857814	0.860978	0.866234	0.872762	0.883438	0.891881	0.900424	0.909978	0.915768	0.92439	0.933791	0.945765	0.956068	0.964102	0.971638	0.976899	0.97986	0.98383	0.98512	0.986819	0.0197438	0.98789	0.988089	0.98818	0.98828	0.98838	0.98817	0.98837	0.98827	0.98827	0.98827	0.98827	0.98817	0.98827	0.98827	0.98837	0.98827
0.0139282	0.854636	0.854254	0.853904	0.854406	0.854312	0.854414	0.855249	0.854981	0.855574	0.856106	0.856985	0.858909	0.860987	0.865373	0.870274	0.877397	0.886174	0.895186	0.902587	0.911195	0.917482	0.925247	0.934641	0.945221	0.954448	0.963631	0.970377	0.975818	0.97996	0.98293	0.985419	0.98591	0.019744	0.98769	0.98789	0.98818	0.98808	0.98838	0.98827	0.98827	0.98827	0.98817	0.98827	0.98817	0.98817	0.98837	0.98837	0.98827	0.98827
0.0145913	0.85782	0.858059	0.857855	0.858059	0.858459	0.858894	0.858979	0.858906	0.859277	0.859996	0.861291	0.863245	0.866106	0.868656	0.874687	0.881793	0.889465	0.899184	0.907258	0.914188	0.917848	0.925613	0.934916	0.944511	0.954862	0.961888	0.969416	0.974999	0.979269	0.982349	0.984739	0.0197158	0.986609	0.987699	0.98789	0.98798	0.98818	0.98828	0.98818	0.98827	0.98827	0.98826	0.98817	0.98827	0.98837	0.98817	0.98836	0.98827	0.98817
0.0156005	0.863606	0.863907	0.863966	0.864615	0.864437	0.865025	0.864928	0.0172897	0.865633	0.866289	0.86707	0.869663	0.872267	0.876598	0.882023	0.888624	0.89749	0.905294	0.912163	0.917797	0.918496	0.927455	0.934574	0.944343	0.953256	0.961093	0.0193535	0.0194702	0.978089	0.981669	0.984159	0.98512	0.986509	0.98749	0.98779	0.98789	0.98798	0.98818	0.98827	0.98816	0.98826	0.98816	0.98817	0.98827	0.98826	0.98826	0.98826	0.98827	0.98806
0.0168453	0.871524	0.871225	0.871698	0.871341	0.871649	0.871422	0.871186	0.872019	0.87267	0.874024	0.875693	0.878139	0.879941	0.884866	0.88978	0.896827	0.904071	0.910538	0.917459	0.921612	0.922556	0.928934	0.935387	0.943902	0.952222	0.959088	0.966712	0.972187	0.97697	0.981069	0.982559	0.984639	0.986019	0.986909	0.98759	0.987599	0.98807	0.98798	0.98807	0.98805	0.98816	0.98816	0.98826	0.98825	0.98826	0.98806	0.98815	0.98827	0.98806
0.0175481	0.875699	0.875615	0.875534	0.875739	0.875475	0.875627	0.875176	0.875818	0.876945	0.87834	0.881324	0.883182	0.884391	0.888503	0.895121	0.901935	0.907627	0.0182862	0.920626	0.923802	0.924575	0.929353	0.936773	0.943668	0.951554	0.959645	0.965579	0.971006	0.976409	0.980189	0.982359	0.984249	0.985619	0.9865	0.98759	0.98759	0.98786	0.98808	0.98806	0.98805	0.98816	0.98816	0.98816	0.98826	0.98826	0.98805	0.98816	0.98816	0.98805
0.0181119	0.878809	0.879042	0.878867	0.879211	0.879426	0.879183	0.878614	0.878899	0.880232	0.881286	0.884129	0.886587	0.888201	0.892154	0.898028	0.905537	0.911613	0.917227	0.922035	0.925656	0.926254	0.929977	0.936785	0.944062	0.951483	0.959584	0.965527	0.969173	0.976438	0.979589	0.981879	0.98393	0.985619	0.98621	0.98708	0.98758	0.98778	0.98807	0.98806	0.98805	0.98815	0.98806	0.98816	0.98816	0.98815	0.98816	0.98815	0.98806	0.98805
0.0186615	0.881996	0.882743	0.882725	0.882976	0.882961	0.882364	0.881821	0.882498	0.883121	0.884997	0.887366	0.890681	0.891924	0.89603	0.901201	0.908939	0.914121	0.920155	0.923906	0.927738	0.925434	0.930688	0.938263	0.0188742	0.951001	0.958602	0.964985	0.970622	0.974838	0.0195774	0.981849	0.983539	0.985339	0.9858	0.98719	0.98748	0.98767	0.98797	0.98805	0.98816	0.98805	0.98806	0.98815	0.98815	0.98816	0.98815	0.98805	0.98805	0.019761
0.0192315	0.885546	0.885815	0.88589	0.885772	0.885933	0.886477	0.88586	0.886117	0.887284	0.888685	0.890741	0.893608	0.896382	0.899848	0.904115	0.912603	0.917723	0.922429	0.926577	0.927585	0.928074	0.930946	0.938381	0.943859	0.951621	0.958379	0.964342	0.97006	0.974438	0.978818	0.980859	0.983449	0.985029	0.98559	0.9869	0.98748	0.98757	0.98796	0.98806	0.98806	0.98816	0.98805	0.98805	0.98816	0.98815	0.98805	0.98815	0.98805	0.98806
0.019872	0.889219	0.890022	0.8899	0.890276	0.889718	0.889648	0.890195	0.890584	0.89132	0.892479	0.89476	0.897582	0.899891	0.903855	0.908761	0.915147	0.921691	0.925183	0.928576	0.930119	0.928841	0.932774	0.938112	0.94415	0.951825	0.958188	0.963599	0.96986	0.973925	0.0195642	0.980379	0.982959	0.98462	0.98561	0.9868	0.98717	0.98758	0.98777	0.98806	0.98806	0.98805	0.98806	0.98805	0.98815	0.98805	0.98815	0.98815	0.98806	0.98794
0.0208584	0.895568	0.895504	0.895664	0.895946	0.895583	0.89525	0.896068	0.896296	0.897539	0.899351	0.901155	0.903593	0.907467	0.910905	0.914352	0.920194	0.925605	0.930134	0.932663	0.931967	0.932212	0.934846	0.938641	0.944583	0.950976	0.957311	0.964228	0.969267	0.972783	0.0195422	0.980079	0.982459	0.984139	0.985519	0.986219	0.98708	0.98737	0.98766	0.98796	0.98806	0.98796	0.98806	0.98805	0.98804	0.98815	0.98815	0.98815	0.98804	0.98794
0.0221438	0.903464	0.903211	0.903428	0.903362	0.903158	0.903375	0.903922	0.904543	0.905457	0.907606	0.908715	0.0182279	0.915285	0.918287	0.923049	0.926819	0.933171	0.936067	0.937103	0.936368	0.934919	0.936607	0.94056	0.945319	0.9517	0.957374	0.962471	0.968305	0.972603	0.976067	0.979308	0.0196272	0.983549	0.985029	0.986	0.98649	0.98707	0.98767	0.98786	0.98786	0.98795	0.98796	0.98795	0.98796	0.98815	0.98815	0.98804	0.98794	0.98794
0.0228413	0.907149	0.907873	0.906897	0.906869	0.907311	0.907538	0.907727	0.908752	0.909364	0.912057	0.913595	0.915916	0.919655	0.922736	0.926978	0.931686	0.936138	0.938828	0.940555	0.939113	0.936421	0.938136	0.940438	0.946631	0.951495	0.0191336	0.962958	0.967572	0.972671	0.975296	0.978618	0.981059	0.983169	0.98472	0.9859	0.98639	0.98719	0.98746	0.98776	0.98775	0.98795	0.98796	0.98796	0.98805	0.98805	0.98795	0.98803	0.98803	0.98794
0.0234217	0.910484	0.91056	0.910363	0.910513	0.910617	0.911651	0.912197	0.912545	0.91277	0.916215	0.917647	0.919592	0.922775	0.927499	0.930639	0.935426	0.938759	0.941357	0.941842	0.939893	0.938753	0.938747	0.94208	0.945867	0.951861	0.95674	0.963316	0.967453	0.97139	0.975225	0.978418	0.980479	0.983149	0.984629	0.985519	0.98628	0.98718	0.98727	0.98777	0.98786	0.98785	0.98796	0.98795	0.98806	0.98794	0.98784	0.98794	0.98804	0.98783
0.0239773	0.914286	0.91405	0.913749	0.913871	0.913824	0.914934	0.914896	0.915948	0.91682	0.918799	0.920606	0.0184773	0.926255	0.930667	0.934014	0.938352	0.941865	0.943069	0.943554	0.943263	0.938756	0.939964	0.942797	0.946754	0.95097	0.956559	0.963297	0.967168	0.970977	0.974674	0.978428	0.980769	0.982559	0.984529	0.985419	0.9863	0.98698	0.98716	0.98767	0.98795	0.98786	0.98786	0.98795	0.98806	0.98794	0.98794	0.98793	0.98794	0.98794
0.0245353	0.917905	0.917179	0.917414	0.917253	0.918025	0.918146	0.919002	0.919469	0.921357	0.922442	0.924105	0.926954	0.929851	0.933291	0.937375	0.941525	0.9439	0.945688	0.945387	0.94578	0.938869	0.940384	0.943189	0.947798	0.950154	0.957097	0.962434	0.967345	0.971196	0.973903	0.978418	0.980079	0.982269	0.984339	0.98541	0.9863	0.98689	0.98707	0.98746	0.98785	0.98785	0.98786	0.98795	0.98795	0.98794	0.98793	0.98793	0.98794	0.98794
0.0251414	0.921596	0.0184189	0.920934	0.920753	0.921148	0.92175	0.922161	0.923853	0.924515	0.925767	0.927947	0.930924	0.933117	0.936703	0.9413	0.94454	0.946967	0.948486	0.948918	0.947114	0.939418	0.941679	0.944048	0.946905	0.951766	0.957431	0.96214	0.966206	0.971135	0.974184	0.977106	0.980008	0.982489	0.983939	0.985329	0.98559	0.98679	0.98717	0.98736	0.98776	0.98785	0.98795	0.98784	0.98794	0.98794	0.98794	0.98794	0.98793	0.98794
0.025968	0.926941	0.92677	0.926182	0.926169	0.925609	0.926417	0.927366	0.92803	0.929407	0.931683	0.933396	0.93617	0.938207	0.941439	0.945953	0.948768	0.950345	0.952037	0.951802	0.948853	0.943175	0.942793	0.944738	0.947902	0.952647	0.956139	0.961997	0.966303	0.970493	0.973632	0.976835	0.980018	0.0196494	0.983439	0.98472	0.985619	0.98638	0.98707	0.98747	0.98756	0.98776	0.98776	0.98783	0.98795	0.98783	0.98804	0.98794	0.98793	0.98784
0.0274005	0.934929	0.935364	0.934413	0.935045	0.935088	0.935574	0.936777	0.937451	0.93854	0.939703	0.942223	0.943917	0.947097	0.950385	0.954009	0.955996	0.957205	0.95673	0.956907	0.953068	0.946348	0.945416	0.946867	0.949366	0.9529	0.957479	0.961502	0.966299	0.969808	0.973197	0.976074	0.979038	0.981179	0.982879	0.984739	0.98511	0.98608	0.98669	0.98737	0.98756	0.98756	0.98776	0.98766	0.98774	0.98793	0.98783	0.98774	0.98783	0.98783
0.0281013	0.938981	0.938942	0.939433	0.939564	0.939083	0.940657	0.941593	0.941194	0.943314	0.944271	0.946692	0.948813	0.951602	0.954775	0.957922	0.959645	0.961063	0.959976	0.958818	0.954819	0.948885	0.946766	0.94815	0.949871	0.953787	0.957918	0.960987	0.96577	0.970176	0.972916	0.975552	0.979067	0.980698	0.982598	0.984039	0.985229	0.98599	0.98679	0.98717	0.98736	0.98756	0.98766	0.98775	0.98775	0.987731	0.98793	0.98783	0.987731	0.98783
0.0287055	0.943128	0.943095	0.942825	0.942925	0.943072	0.943933	0.944212	0.945768	0.947171	0.948228	0.950489	0.952323	0.954176	0.959221	0.961009	0.962358	0.96409	0.963232	0.961442	0.957829	0.948711	0.948053	0.948527	0.950615	0.954354	0.0191463	0.961297	0.965671	0.969466	0.973165	0.975761	0.978416	0.981098	0.982169	0.984049	0.984429	0.986019	0.98669	0.98707	0.98738	0.98745	0.98766	0.98775	0.98784	0.98774	0.98783	0.98783	0.987731	0.98774
0.0292567	0.946868	0.946248	0.946156	0.94698	0.947216	0.947338	0.947784	0.949375	0.95041	0.951752	0.954001	0.95589	0.958903	0.961687	0.964203	0.965017	0.965936	0.965431	0.963631	0.959573	0.018986	0.948792	0.949502	0.950815	0.954159	0.958424	0.961855	0.965281	0.969014	0.972674	0.975671	0.977945	0.980718	0.982389	0.983569	0.984939	0.986	0.9865	0.98687	0.98718	0.98747	0.98756	0.98774	0.98784	0.98783	0.987731	0.987621	0.98795	0.98784
0.0298049	0.949958	0.949542	0.949691	0.949474	0.950305	0.951037	0.951124	0.951827	0.953257	0.955592	0.957789	0.959135	0.962273	0.964533	0.966901	0.967965	0.969191	0.968426	0.965279	0.960585	0.951847	0.949963	0.950099	0.951741	0.954512	0.958176	0.961484	0.96582	0.968923	0.972083	0.975229	0.978145	0.980347	0.982189	0.983479	0.984629	0.98601	0.98648	0.98699	0.98697	0.98726	0.98756	0.98775	0.98785	0.98783	0.987731	0.987731	0.98784	0.98784
0.0304178	0.953873	0.953619	0.95353	0.953476	0.954197	0.0190965	0.954592	0.955397	0.956622	0.959496	0.961066	0.963344	0.965689	0.967612	0.968836	0.971071	0.971827	0.971114	0.967164	0.961346	0.95428	0.951389	0.951507	0.952209	0.955065	0.958696	0.961399	0.965481	0.968562	0.972361	0.974549	0.978003	0.980357	0.981989	0.983259	0.984339	0.985919	0.9863	0.98698	0.98698	0.98735	0.98755	0.98755	0.98783	0.98774	0.987731	0.98774	0.98783	0.987731
0.0312658	0.958945	0.958646	0.958715	0.958784	0.959361	0.960141	0.0192025	0.961339	0.962427	0.964285	0.965946	0.968157	0.970949	0.971472	0.974253	0.975086	0.976125	0.974196	0.970181	0.0192626	0.957399	0.953144	0.953032	0.952944	0.955991	0.958391	0.962429	0.965344	0.968539	0.97209	0.974807	0.977294	0.979706	0.981118	0.983388	0.98432	0.985429	0.986309	0.98648	0.98709	0.98736	0.98746	0.987631	0.98774	0.98784	0.987731	0.98774	0.98774	0.987731
0.0327235	0.968181	0.96758	0.968094	0.967892	0.968481	0.969373	0.969685	0.969832	0.971942	0.972409	0.974431	0.977049	0.97776	0.980488	0.98191	0.982964	0.982205	0.979682	0.975378	0.968728	0.96038	0.956426	0.95481	0.954796	0.957204	0.959575	0.962043	0.965931	0.0193549	0.971496	0.974617	0.976881	0.979016	0.980918	0.982588	0.984269	0.98482	0.98621	0.9866	0.98687	0.98707	0.98726	0.98764	0.0197508	0.98774	0.98784	0.987631	0.987731	0.98783
0.0334247	0.972593	0.972021	0.971757	0.972024	0.972663	0.973118	0.974188	0.975219	0.975742	0.977674	0.978567	0.981447	0.982614	0.0196739	0.985434	0.986266	0.985401	0.982352	0.978232	0.969051	0.963079	0.957881	0.956206	0.955847	0.958106	0.959503	0.962784	0.965527	0.967693	0.0194377	0.974104	0.97643	0.978945	0.980328	0.982408	0.984079	0.98511	0.98591	0.986409	0.98678	0.98717	0.019745	0.98736	0.98764	0.98774	0.987731	0.98774	0.987631	0.987821
0.0340193	0.976284	0.975993	0.975904	0.975652	0.97631	0.977766	0.978094	0.978859	0.979984	0.980939	0.982004	0.983999	0.986304	0.986933	0.988088	0.989558	0.988037	0.984965	0.98032	0.973527	0.961633	0.958585	0.95711	0.957309	0.9577	0.960148	0.963023	0.965084	0.968432	0.971025	0.973952	0.97682	0.978594	0.980586	0.982098	0.983459	0.0196986	0.0197164	0.9864	0.98648	0.98728	0.98726	0.98745	0.98765	0.98765	0.98764	0.987731	0.987821	0.987731
0.0345717	0.979428	0.978508	0.979087	0.979387	0.980247	0.980551	0.981727	0.98276	0.983952	0.984061	0.985752	0.987582	0.98991	0.990794	0.991163	0.991944	0.990861	0.987251	0.982231	0.974873	0.963493	0.95938	0.957956	0.957572	0.95888	0.960587	0.962599	0.965184	0.968642	0.971022	0.973781	0.976468	0.978513	0.980577	0.981818	0.983779	0.984459	0.985619	0.98639	0.98669	0.98708	0.98726	0.98745	0.98755	0.98765	0.987631	0.98775	0.98783	0.987621
0.0351183	0.982291	0.982681	0.982801	0.982795	0.984082	0.98386	0.98507	0.986478	0.98727	0.987365	0.989459	0.990493	0.993151	0.994474	0.0198756	0.994222	0.993025	0.989692	0.983592	0.97571	0.965096	0.960984	0.95886	0.958442	0.958985	0.960544	0.962923	0.965633	0.968309	0.971719	0.973368	0.976098	0.978513	0.980086	0.982128	0.983208	0.984629	0.985529	0.986309	0.9867	0.98708	0.98726	0.98735	0.98755	0.98754	0.98764	0.98774	0.987731	0.987631
0.035729	0.985882	0.986021	0.9866	0.9869	0.986938	0.987452	0.988228	0.989416	0.990479	0.991153	0.993627	0.99446	0.996468	0.996985	0.99719	0.997111	0.995623	0.992311	0.986377	0.979632	0.964261	0.961473	0.959348	0.958921	0.959836	0.961051	0.963038	0.966172	0.968357	0.97118	0.972897	0.976146	0.978091	0.980686	0.981928	0.982979	0.984239	0.985529	0.986019	0.98649	0.98708	0.98728	0.98725	0.98754	0.98755	0.98764	0.987731	0.987521	0.98783
0.0366443	0.992115	0.991749	0.991846	0.992028	0.992422	0.993879	0.994065	0.994997	0.995354	0.997196	0.998921	1.00039	1.00099	1.00221	1.00229	1.00113	0.999787	0.996302	0.989816	0.980294	0.969244	0.963686	0.961215	0.960159	0.96073	0.961562	0.963396	0.966016	0.968677	0.971115	0.973097	0.975785	0.978172	0.979664	0.981677	0.982888	0.984478	0.985029	0.985729	0.98659	0.98677	0.98706	0.98746	0.98735	0.98765	0.98764	0.987631	0.987621	0.987731
0.0380551	1.00028	1.00114	1.00105	1.00047	1.00149	1.00201	1.00308	1.00389	1.00431	1.0061	1.00746	1.0085	1.0096	1.00932	1.00881	1.00794	1.00649	1.00155	0.994136	0.984256	0.974176	0.966429	0.963709	0.962378	0.961848	0.962594	0.96451	0.966346	0.96835	0.970673	0.973594	0.975343	0.978288	0.979152	0.981216	0.982798	0.983588	0.984939	0.985619	0.986509	0.98659	0.98687	0.98718	0.98744	0.98754	0.98764	0.987631	0.987731	0.987731
0.0387557	1.00539	1.00539	1.00577	1.00596	1.00623	1.00648	1.00716	1.00815	1.00948	1.01014	1.01183	1.01273	1.01331	1.01305	1.01195	0.0202193	1.00914	1.00422	0.996866	0.98699	0.974404	0.968409	0.964422	0.962924	0.962757	0.963794	0.964458	0.966309	0.96866	0.970731	0.973604	0.975511	0.977217	0.979501	0.980906	0.982418	0.983869	0.984859	0.985619	0.98621	0.019726	0.98696	0.98716	0.98725	0.98755	0.98755	0.987631	0.987731	0.987721
0.0393443	1.00873	1.00897	1.00923	1.00972	1.00961	1.01036	1.01099	1.01239	1.01307	1.01383	1.01469	1.01596	1.01654	1.01579	1.01485	0.0202786	1.01082	1.00631	0.99866	0.990329	0.975738	0.96848	0.965586	0.963938	0.963335	0.964056	0.964816	0.966758	0.968686	0.970769	0.973362	0.975501	0.977205	0.979191	0.980955	0.982618	0.983288	0.984759	0.985629	0.986309	0.0197258	0.98677	0.98707	0.98736	0.98745	0.98764	0.987531	0.987621	0.987711
0.0398936	1.01276	1.01297	1.0128	1.01272	1.01353	1.01382	1.01445	1.01518	1.01665	1.0173	1.01798	1.01941	1.01969	1.01865	1.01739	1.01571	1.01301	1.00861	1.00065	0.991658	0.975514	0.970437	0.966434	0.96457	0.964057	0.964191	0.965336	0.966635	0.968715	0.971157	0.973101	0.975479	0.977327	0.97904	0.980955	0.982367	0.983488	0.984169	0.985629	0.986319	0.98639	0.98669	0.98697	0.98735	0.98745	0.987531	0.98764	0.987631	0.987611
0.0404489	1.01607	1.01705	1.01635	1.01642	1.01652	1.01734	1.0178	1.01847	1.01946	1.02014	1.02174	1.02192	1.02151	1.02191	1.02054	1.01858	1.01608	1.0099	1.00325	0.991202	0.978564	0.971723	0.967387	0.965078	0.964823	0.96442	0.966025	0.966573	0.969083	0.971367	0.972868	0.975289	0.977366	0.978979	0.980565	0.982196	0.983318	0.984369	0.98522	0.986119	0.986509	0.98667	0.98707	0.98736	0.98734	0.987531	0.98754	0.987631	0.987721
0.041058	1.01955	1.02008	1.0197	1.02046	1.02039	1.02097	1.0224	1.02238	1.02306	1.02438	1.02572	1.0254	0.0204999	1.02511	1.02386	1.02181	1.01835	1.01241	0.0200848	0.992549	0.980147	0.97281	0.96846	0.966208	0.965282	0.965377	0.965753	0.967385	0.969131	0.971047	0.972936	0.975457	0.977134	0.979159	0.980523	0.981677	0.983528	0.984059	0.984939	0.986019	0.9864	0.98679	0.98698	0.98725	0.98734	0.98754	0.987631	0.98754	0.987721
0.0419105	1.02448	1.02475	1.02498	1.02558	1.02588	1.0258	1.02685	1.02751	1.02872	1.03003	1.03053	1.03037	1.03058	1.02909	1.0277	1.0247	1.02127	1.01552	1.00652	0.9954	0.981871	0.975035	0.969147	0.967571	0.966344	0.966004	0.967114	0.967653	0.969357	0.971215	0.972704	0.975476	0.976931	0.978818	0.980343	0.981796	0.983128	0.983788	0.985139	0.985629	0.986409	0.98658	0.98698	0.98726	0.98735	0.98745	0.98754	0.987521	0.987731
0.0433565	1.03391	1.03411	1.03438	1.03486	1.03514	1.03571	1.03592	1.03664	1.0374	1.03776	1.03868	1.03874	1.03819	1.03796	1.03625	1.03184	1.02651	1.02098	1.01072	1.00006	0.985413	0.977936	0.973127	0.969473	0.967839	0.967165	0.967346	0.968337	0.969544	0.971141	0.97333	0.975034	0.977222	0.978806	0.979882	0.981704	0.982767	0.984118	0.984578	0.985768	0.9861	0.9863	0.98676	0.98697	0.98736	0.98746	0.98754	0.987431	0.987631
0.0440619	1.03801	1.03845	1.03901	1.03945	1.03927	1.03963	1.04002	1.04084	1.04163	1.04324	1.04274	1.04286	1.04327	1.0408	1.03965	1.03571	1.0309	1.02251	1.0127	1.00127	0.987929	0.979948	0.973841	0.970552	0.968574	0.967841	0.967604	0.968405	0.969731	0.97211	0.973282	0.974951	0.976899	0.978625	0.980121	0.981304	0.983006	0.983808	0.984578	0.985449	0.98611	0.9864	0.98669	0.98687	0.98725	0.98735	0.98754	0.98764	0.987421
0.0446706	1.042	1.04254	1.0432	1.04389	1.04381	1.04362	1.04485	1.04499	1.04559	1.0464	1.04736	1.04652	1.04583	1.04465	1.04241	1.03867	1.0332	1.02469	1.01489	1.00332	0.98802	0.980884	0.975087	0.971687	0.96929	0.968281	0.968193	0.968984	0.970213	0.971496	0.97355	0.97499	0.977109	0.978344	0.979789	0.981184	0.983126	0.983508	0.984898	0.985149	0.985819	0.986419	0.98659	0.98707	0.98705	0.98736	0.98754	0.987521	0.987431
0.0452231	1.04634	1.04656	1.04681	1.04702	1.04729	1.04774	0.0209718	1.04875	1.04921	1.05054	1.05056	1.04922	1.04865	1.04734	1.04602	1.0403	1.03521	1.02677	1.0173	1.00438	0.989348	0.982132	0.97623	0.972458	0.969983	0.968741	0.96871	0.969051	0.970681	0.972036	0.973418	0.974899	0.976496	0.978654	0.980309	0.980862	0.982816	0.983308	0.984698	0.985059	0.985819	0.98639	0.9867	0.98677	0.98716	0.98735	0.98744	0.987521	0.0197482
0.0457638	1.04975	0.0210045	1.05042	1.05036	1.05138	1.05156	1.05224	1.0517	1.05313	1.05329	1.05363	1.05281	1.05134	1.05011	1.04821	1.04362	1.03699	1.02782	1.01896	1.00476	0.990335	0.982862	0.977972	0.973139	0.970877	0.969436	0.969011	0.969539	0.970478	0.972446	0.0194636	0.974567	0.976997	0.978613	0.980099	0.980801	0.982345	0.983408	0.984369	0.985139	0.985929	0.98621	0.98669	0.98678	0.98705	0.98725	0.98744	0.987531	0.987521
0.0463774	1.05272	1.05309	1.05395	1.05462	1.05528	1.05585	1.05633	1.05591	1.05661	1.05773	1.05703	1.05583	1.05513	1.05336	1.05074	1.04538	1.03949	1.03126	1.01935	1.009	0.990465	0.984004	0.97822	0.974563	0.971372	0.969961	0.969279	0.969998	0.971127	0.972284	0.973505	0.975045	0.976655	0.978281	0.979738	0.981092	0.982326	0.983257	0.984559	0.985059	0.985549	0.98611	0.98669	0.98687	0.98696	0.98724	0.98735	0.987531	0.987521
0.0470994	1.05751	1.05784	1.05816	1.05918	1.05943	1.05995	1.06043	1.06061	1.06119	1.06113	1.06097	1.05968	1.05953	1.05769	1.0534	1.04876	1.04272	1.03375	1.02338	1.01011	0.992927	0.985783	0.979282	0.975377	0.972205	0.970693	0.970266	0.970228	0.971334	0.971971	0.974106	0.974923	0.976572	0.978032	0.979716	0.981082	0.982494	0.983686	0.984108	0.984969	0.985229	0.9862	0.9863	0.98688	0.98705	0.98715	0.98744	0.98744	0.987421
0.0486363	1.06825	1.06764	1.06815	1.06955	1.0693	1.06938	1.06967	1.07046	1.06988	0.0213991	1.06988	1.06921	1.06748	1.06452	1.06107	1.05573	1.0487	1.03993	1.02818	1.01267	0.99801	0.989703	0.981985	0.977104	0.974698	0.97226	0.971528	0.971224	0.97178	0.973018	0.019471	0.974942	0.977111	0.977968	0.979225	0.0196234	0.982314	0.982916	0.983928	0.984669	0.985659	0.985919	0.986219	0.98677	0.98696	0.987041	0.98725	0.987331	0.987531
0.0493526	1.07291	1.07304	1.07327	1.07335	1.074	1.0741	1.07389	1.07432	1.07487	1.07504	1.07425	1.07314	1.07181	1.06792	1.0641	1.0583	1.05221	1.04199	1.03185	1.01498	0.999392	0.989705	0.98355	0.979101	0.974815	0.973222	0.972056	0.971525	0.972521	0.973196	0.97398	0.975501	0.976688	0.977797	0.979384	0.98116	0.982162	0.982945	0.983818	0.984288	0.985469	0.98571	0.986309	0.98668	0.98696	0.98695	0.98735	0.98744	0.987431
0.0499687	1.07682	1.07652	1.07736	1.07742	0.0215542	1.07778	1.07779	1.07852	1.07897	1.0789	1.07779	1.07698	1.07483	1.07222	1.0677	1.06202	1.05458	1.04462	1.0334	1.01804	0.999765	0.990809	0.985068	0.979673	0.97579	0.973851	0.972464	0.972305	0.972599	0.973367	0.974317	0.975559	0.976598	0.977626	0.979484	0.980799	0.982062	0.982655	0.984157	0.984388	0.985169	0.98551	0.986509	0.98677	0.98677	0.98706	0.98715	0.987331	0.987531
0.0505103	1.08028	1.08011	1.08054	1.08087	1.08058	1.08149	1.08216	1.08246	1.08234	1.08253	1.08167	1.08018	1.07714	1.07485	1.07026	1.06424	1.05558	1.04707	1.03539	1.01916	1.00065	0.992089	0.986254	0.980416	0.97652	0.97444	0.972797	0.972644	0.972799	0.973461	0.974598	0.975337	0.976359	0.977985	0.979743	0.980899	0.981682	0.982614	0.983877	0.984378	0.0197032	0.985639	0.9864	0.98648	0.98687	0.98696	0.987141	0.98744	0.987421
0.0510583	1.08371	1.0837	1.08373	1.08433	1.08507	1.08527	1.08679	1.08628	1.08573	1.08567	1.08498	1.08332	1.08085	1.07731	1.07261	1.06626	1.0594	1.04866	1.03629	1.02196	1.00099	0.993641	0.986495	0.980941	0.977371	0.975371	0.973425	0.972751	0.973511	0.973552	0.974456	0.975356	0.976498	0.978195	0.979562	0.980587	0.981831	0.982765	0.983726	0.984298	0.984959	0.985739	0.986309	0.98649	0.98677	0.98695	0.987141	0.987331	0.987321
0.051666	1.0871	1.0874	1.08758	1.08828	1.08866	1.08929	1.08977	1.09002	1.08951	1.08906	1.08919	1.08688	1.08444	1.08073	1.07537	1.06911	1.06157	1.05094	1.03844	1.02305	1.00252	0.994992	0.986695	0.982337	0.978201	0.97553	0.974034	0.973382	0.973498	0.973672	0.974766	0.975334	0.976757	0.978373	0.979301	0.980758	0.98146	0.0196527	0.983796	0.984218	0.984869	0.985939	0.986019	0.98639	0.98688	0.98695	0.987041	0.987231	0.987331
0.0523627	1.09144	1.09223	1.09226	1.0931	1.09275	1.09368	1.09343	1.09418	1.09383	1.09355	1.09254	1.09037	1.0883	1.08409	1.07852	1.07253	1.06409	1.05343	1.04049	1.02489	1.00513	0.995918	0.987912	0.983501	0.979136	0.976171	0.974666	0.973949	0.973705	0.973911	0.975103	0.975764	0.976586	0.978334	0.97934	0.980836	0.981389	0.982243	0.983516	0.984347	0.984998	0.985759	0.98621	0.98628	0.019731	0.98697	0.987031	0.987141	0.987331
0.0538453	1.10185	1.10208	1.10132	1.10258	1.10264	1.10303	1.10283	1.10337	1.10312	1.10135	1.10055	1.09893	1.09604	1.09158	1.08637	0.021581	1.07083	1.0584	1.04509	1.02773	1.00831	0.997913	0.989983	0.98579	0.98109	0.978097	0.975602	0.975037	0.974423	0.974927	0.9753	0.976132	0.977003	0.977921	0.979298	0.980353	0.981538	0.982482	0.983274	0.984067	0.985198	0.985359	0.985929	0.98621	0.98648	0.98677	0.98715	0.987141	0.98744
0.0555109	1.11294	1.11341	1.11337	0.0222579	1.11355	1.11278	1.11223	1.11254	1.11265	1.11142	1.10993	1.108	1.10459	1.09942	1.09356	1.08663	1.07771	1.06531	1.05069	1.03259	1.01111	1.00165	0.994017	0.987869	0.983338	0.979736	0.977245	0.976268	0.97542	0.975364	0.975947	0.976379	0.976981	0.978458	0.978996	0.980572	0.981446	0.98237	0.983375	0.983926	0.984708	0.985088	0.985839	0.986119	0.98649	0.98676	0.98697	0.98715	0.987331
0.0570696	1.1237	1.12349	1.12418	1.12413	1.12336	0.0224543	1.1226	1.12254	1.1211	1.12065	1.11859	1.11606	1.11251	1.10789	1.10103	1.0935	1.084	1.07096	1.05404	1.03533	0.0202585	1.00434	0.995599	0.989849	0.985016	0.981572	0.979114	0.977486	0.976272	0.976173	0.976304	0.976728	0.977317	0.978766	0.979574	0.980131	0.981004	0.982439	0.983172	0.983965	0.984437	0.985198	0.985459	0.986229	0.9862	0.98678	0.98686	0.98715	0.987141
0.0585119	1.13365	1.13303	1.13282	1.13241	1.13228	1.13178	1.13199	1.13114	1.13088	1.12954	1.12683	1.12322	1.11897	1.11568	1.10834	1.09916	1.08961	1.07489	1.05886	1.03959	1.01332	1.00424	0.998219	0.991569	0.986942	0.983086	0.0196011	0.978358	0.977276	0.976762	0.976912	0.976884	0.977796	0.978844	0.979572	0.980018	0.981434	0.982068	0.98299	0.983924	0.984337	0.984827	0.985488	0.986268	0.9864	0.98659	0.98686	0.98695	0.987131
0.0598396	1.14178	1.14119	1.14078	1.14093	1.14139	1.14115	1.14007	1.13909	1.1383	1.13639	1.13386	1.13088	1.12669	1.12089	1.11346	1.10585	1.09397	1.07953	1.06146	1.04056	1.01472	1.00693	0.998317	0.994356	0.987864	0.984951	0.981501	0.979356	0.978221	0.97751	0.977569	0.97779	0.978072	0.978854	0.979059	0.980607	0.980982	0.981907	0.983219	0.983733	0.0196861	0.984827	0.985388	0.985749	0.986319	0.9866	0.98677	0.986841	0.987082
0.0611275	1.14981	1.1502	1.14933	1.14836	1.15	1.14945	1.14831	1.14745	1.14566	1.14418	1.1411	1.13808	1.13332	1.12735	1.11903	1.11016	1.09924	1.08398	1.06395	1.04182	1.016	1.00649	0.999981	0.994323	0.989631	0.985763	0.982462	0.98076	0.979298	0.978158	0.977877	0.978362	0.978531	0.978629	0.979589	0.980475	0.981271	0.981946	0.982849	0.983882	0.983975	0.984818	0.985078	0.985759	0.986139	0.98657	0.98655	0.986891	0.986913
0.0623513	1.15827	1.15862	1.15755	1.15699	1.15638	1.15671	1.15589	1.15343	1.15212	1.15029	1.14714	1.14333	1.13888	1.13252	1.12454	1.11485	1.10331	1.08604	1.0667	1.04438	1.01576	1.00834	1.00046	0.0199052	0.990929	0.986544	0.983283	0.98149	0.980267	0.979087	0.978567	0.97856	0.978509	0.978998	0.980026	0.980524	0.98139	0.981934	0.982697	0.983441	0.984255	0.984796	0.985298	0.985649	0.98601	0.98606	0.986691	0.986623	0.986734
0.0635007	1.16638	1.16548	1.16451	1.16425	1.16399	1.16341	1.16267	1.16134	1.15908	1.15672	1.15323	1.14957	1.14404	1.13805	1.12953	1.11895	1.1051	1.08969	1.06814	1.04372	1.01702	1.00873	0.0200521	0.996176	0.991309	0.987598	0.984495	0.98221	0.980566	0.979817	0.979107	0.978618	0.978956	0.979567	0.980055	0.980192	0.981788	0.981912	0.982817	0.0196608	0.984214	0.984706	0.985218	0.985429	0.98587	0.986331	0.986362	0.986615	0.986516
0.0646473	1.17336	1.17235	1.17243	1.17188	1.17127	1.16982	1.16992	1.1681	1.16622	1.16311	1.16009	1.15522	1.1507	1.14376	1.134	1.12339	1.10935	1.09289	0.0214058	1.04563	1.0174	1.00927	1.00386	0.997313	0.992818	0.988411	0.985376	0.98311	0.981347	0.980198	0.979396	0.979234	0.979305	0.979596	0.980344	0.980761	0.981317	0.981622	0.982666	0.019672	0.983743	0.984706	0.985237	0.985329	0.985941	0.986243	0.986203	0.986285	0.98623
0.0657269	1.18036	1.17966	1.17962	1.17869	1.17787	1.17644	1.1758	1.17462	1.17198	1.16956	1.16541	1.161	1.15537	1.14814	1.13856	1.12713	1.11331	1.09381	1.07335	1.04825	1.01898	1.01072	1.00375	0.998238	0.993661	0.989657	0.986108	0.983792	0.981926	0.980857	0.979995	0.979513	0.979716	0.979704	0.980502	0.980832	0.981395	0.981471	0.982705	0.983349	0.984292	0.984526	0.985257	0.9853	0.985931	0.985982	0.985915	0.985979	0.985942
0.0668279	1.18778	1.18714	1.18642	1.18612	1.18525	1.18379	1.18309	1.18033	1.17875	1.17593	1.1727	1.16762	1.16077	1.15348	1.14226	1.13164	1.1162	1.09712	1.07577	1.05161	1.02012	1.01034	1.00442	0.999366	0.994656	0.990329	0.986157	0.984461	0.982935	0.981606	0.980294	0.979763	0.980195	0.980063	0.98062	0.9808	0.981464	0.98192	0.982676	0.983288	0.984012	0.984375	0.985018	0.98561	0.985572	0.0197135	0.985737	0.985879	0.985605
0.0678812	1.194	1.19351	1.19342	1.19311	1.19192	1.19114	1.18904	1.18816	1.18482	1.1816	1.17795	1.17212	1.16572	1.1578	1.14804	1.13354	1.11902	1.10159	1.07843	1.05147	1.0207	1.0108	1.00528	1.00041	0.995039	0.991633	0.98738	0.984952	0.983337	0.982094	0.981104	0.980271	0.980413	0.980412	0.980319	0.981086	0.981464	0.982198	0.982544	0.983278	0.984051	0.984535	0.984937	0.98519	0.985702	0.985505	0.985499	0.985413	0.985038
0.0689282	1.19991	1.19947	1.19925	1.19847	1.19757	1.19661	1.19535	1.19304	1.19038	1.18679	1.18308	1.17731	1.17095	1.16178	1.15311	1.13838	1.12179	1.10371	1.08024	1.05359	1.02143	1.01153	1.0057	1.001	0.996055	0.991763	0.988314	0.986034	0.984068	0.982214	0.981451	0.980834	0.980679	0.980569	0.980608	0.0196244	0.981603	0.982189	0.982713	0.983037	0.983961	0.984494	0.984678	0.98507	0.985394	0.985527	0.985241	0.985135	0.984443
0.069961	1.20598	1.20608	1.20639	1.20546	1.20409	1.2025	1.20102	1.19853	1.19733	1.19296	1.18842	1.18298	1.17568	1.1671	1.15673	1.14191	1.12473	1.10671	1.08203	1.05409	1.02368	1.01214	1.00701	1.00167	0.9967	0.992497	0.989107	0.986163	0.984588	0.982963	0.981811	0.981159	0.981	0.980728	0.980979	0.981594	0.981581	0.982257	0.982813	0.983256	0.983641	0.983984	0.984967	0.985031	0.985196	0.985207	0.984835	0.984768	0.984055
0.0709477	1.21255	1.21252	1.21244	1.21198	1.21102	1.20962	1.20794	1.20551	1.20271	1.19823	1.19345	1.1885	1.18043	1.17216	1.16075	1.14713	1.12801	1.1081	1.08412	1.05542	1.02433	1.01426	1.00739	1.00269	0.997242	0.993614	0.989266	0.986935	0.985238	0.983544	0.982362	0.981678	0.981328	0.980828	0.981397	0.981455	0.0196326	0.982436	0.982652	0.983366	0.98367	0.984075	0.984478	0.984902	0.985106	0.98496	0.984696	0.984302	0.98365
0.0719425	1.21975	1.2207	1.21976	1.21914	1.21721	1.2152	1.21373	1.21119	1.208	1.2038	1.19928	1.19319	1.18628	1.17555	1.16409	1.14888	1.13074	1.11121	1.08684	1.05602	1.02562	1.01507	1.00821	1.0028	0.998411	0.993834	0.990341	0.987896	0.985618	0.984042	0.98281	0.98181	0.981438	0.981456	0.981524	0.981702	0.981621	0.982377	0.982611	0.983325	0.983831	0.984084	0.984288	0.984653	0.984917	0.984772	0.984557	0.983807	0.983265
0.0729347	1.2274	1.22651	1.22536	1.22495	1.22315	1.22224	1.21966	1.21718	1.21347	1.20924	1.20516	1.19833	1.19054	1.17979	1.16686	1.15169	1.135	1.11278	0.0217536	1.05857	1.02567	1.01617	1.0092	1.00337	0.998712	0.994789	0.991144	0.988135	0.986329	0.984392	0.983401	0.982359	0.982037	0.981564	0.981624	0.981702	0.981777	0.982365	0.0196534	0.983356	0.983519	0.983955	0.984339	0.984623	0.984537	0.984565	0.984141	0.983658	0.98266
0.0739148	1.23284	1.2324	1.23175	1.23051	1.22983	1.22762	1.22571	1.22306	1.21966	1.21551	1.21036	1.2032	1.19452	1.1848	1.17046	1.1549	1.13656	1.11558	1.08979	1.06109	1.02669	1.01719	1.0096	1.00325	0.999961	0.996036	0.991403	0.98906	0.986387	0.984843	0.98379	0.982878	0.982216	0.982014	0.981554	0.981731	0.981987	0.982663	0.982881	0.983217	0.983229	0.984275	0.98412	0.984255	0.984341	0.984296	0.983744	0.983312	0.981806
0.0749096	1.23877	1.23838	1.23837	1.23781	1.23684	1.23363	1.2319	1.22872	1.22497	1.22085	1.2148	1.20822	1.19907	1.1884	0.0234967	0.0231641	1.14107	1.1177	1.09259	1.06044	1.02779	1.0185	1.00974	1.0047	0.99983	0.996226	0.992782	0.989201	0.98717	0.985362	0.0196818	0.982986	0.982524	0.982203	0.981713	0.981949	0.982168	0.982414	0.0196586	0.982886	0.9837	0.984145	0.983871	0.984306	0.984092	0.983918	0.983478	0.982339	0.981421
0.0758744	1.24475	1.24475	1.24476	1.24343	1.24203	1.24	1.23764	1.23512	1.2313	1.22604	1.22017	1.21227	1.20422	1.19283	1.17941	1.16294	1.1425	1.12071	1.09568	1.06243	1.0278	1.01866	1.01141	1.00561	1.00006	0.996438	0.993575	0.989801	0.987791	0.985994	0.984278	0.983436	0.982754	0.982293	0.982141	0.981878	0.982146	0.982802	0.98305	0.983064	0.983641	0.0196735	0.984161	0.983828	0.983844	0.983433	0.983129	0.982351	0.980508
0.0768309	1.25103	1.25107	1.2502	1.24939	1.24818	1.2457	1.24401	1.2403	1.23687	1.23161	1.22469	1.21722	1.20839	1.19736	1.18285	1.16591	1.14538	1.12264	1.09669	1.06668	1.02803	1.01941	1.01198	1.00645	1.00043	0.997253	0.993362	0.990936	0.988302	0.986335	0.984969	0.983566	0.982972	0.982721	0.982251	0.982208	0.982325	0.982592	0.983109	0.983096	0.98368	0.983637	0.983863	0.983798	0.983517	0.982945	0.982625	0.981767	0.979732
0.077771	1.25727	1.25702	1.25633	1.25509	1.25393	1.252	1.2499	1.24585	1.24222	1.23609	1.22994	1.22201	1.21292	1.20041	1.18735	1.16884	1.14904	1.12626	1.09813	1.06554	1.02975	1.01973	1.0131	1.00659	1.00162	0.997535	0.99455	0.990965	0.989083	0.986816	0.985349	0.0196753	0.983141	0.98289	0.98259	0.982377	0.982666	0.982761	0.982958	0.983145	0.0196622	0.983447	0.983685	0.983652	0.983348	0.982826	0.981948	0.980744	0.979489
0.0787228	1.26359	1.26304	1.26205	1.2613	1.25931	1.25752	1.25562	1.2518	1.24773	1.2422	1.23457	1.22625	0.0243477	1.20504	1.19006	1.17341	1.1522	1.12639	1.10052	1.06913	1.02904	1.0203	1.01429	1.00764	1.00194	0.0199723	0.995082	0.991699	0.98861	0.987376	0.98611	0.984083	0.983602	0.9829	0.98286	0.982636	0.982594	0.982951	0.98297	0.983166	0.983151	0.983379	0.983543	0.983293	0.983041	0.982589	0.981731	0.980087	0.978497
0.0796587	1.26912	0.0253857	1.26864	1.26686	1.26498	1.26354	1.26203	1.25797	1.25311	1.24674	1.2397	1.23102	1.22087	1.20868	1.19235	1.17602	1.15538	1.13069	1.10234	1.06916	1.03009	1.02079	1.01352	1.00843	1.0041	0.999711	0.995252	0.992401	0.989212	0.987545	0.986068	0.984585	0.983922	0.983348	0.983117	0.982766	0.982755	0.982741	0.983079	0.983005	0.983092	0.983498	0.983236	0.983134	0.982724	0.982162	0.981305	0.979623	0.977287
0.0806161	1.27441	1.27515	1.27423	1.27318	1.27163	1.26939	1.26641	1.26295	1.25903	1.25276	1.24538	1.2364	0.0245254	1.2121	1.19641	1.18009	1.15852	1.13185	1.10433	1.06964	1.03081	1.02198	1.01489	1.00897	1.00472	0.999115	0.996248	0.992682	0.990528	0.987906	0.986228	0.985194	0.984241	0.983519	0.983038	0.982675	0.983033	0.98289	0.983099	0.983076	0.982963	0.983249	0.983148	0.982976	0.982634	0.981678	0.980567	0.978511	0.977241
0.0815506	1.2804	1.28069	1.27993	1.27887	1.27756	1.27492	1.27272	1.26827	1.26373	1.25778	1.24966	1.23942	1.22915	1.21596	1.20189	1.18224	1.16145	1.13351	1.10503	1.07157	1.03214	0.0204461	1.01599	1.00948	1.0044	1.00082	0.996116	0.993546	0.990487	0.0197653	0.987059	0.985414	0.98432	0.983799	0.983337	0.982996	0.982804	0.98324	0.982999	0.982837	0.983133	0.983159	0.982999	0.982727	0.982375	0.981073	0.980114	0.978327	0.976002
0.0824956	1.28747	1.28739	1.28621	1.28437	1.28285	1.28045	1.27761	1.27355	1.26928	1.26194	1.25492	1.2453	1.23295	1.22018	1.20399	1.18589	1.16327	1.13772	1.1048	0.0214466	1.03273	1.02432	1.01607	1.00988	1.00536	1.00086	0.996952	0.9944	0.991401	0.988415	0.987219	0.985684	0.98464	0.983958	0.983506	0.983304	0.983163	0.98303	0.982779	0.983247	0.982994	0.982912	0.98275	0.982508	0.98188	0.980436	0.97955	0.977991	0.975095
0.0834152	1.29341	1.29333	1.29162	1.29091	1.28878	1.28741	1.28397	1.2794	1.27368	1.26721	1.25913	1.24879	1.23839	1.223	1.20738	1.18865	1.16576	1.13944	1.10861	1.07534	1.03285	1.02454	1.01657	1.01112	1.00578	1.002	0.0199467	0.994158	0.991461	0.98952	0.98753	0.985932	0.984839	0.984357	0.983626	0.983443	0.983232	0.983002	0.983138	0.983066	0.982774	0.982773	0.982621	0.98222	0.981464	0.980219	0.978908	0.976682	0.974889
0.0843144	1.29893	1.29836	1.29765	1.29599	1.29508	1.29212	1.28923	1.2843	1.27953	1.27135	1.26346	1.25272	0.0248489	0.0245264	1.21052	1.19065	1.16797	1.14182	1.1103	1.07464	1.03378	1.02447	1.01807	1.01142	1.00673	1.00179	0.997888	0.994821	0.991641	0.98978	0.98809	0.986413	0.98525	0.984387	0.983873	0.983573	0.983273	0.98334	0.98297	0.982986	0.982696	0.982573	0.0196475	0.981974	0.981067	0.979861	0.978312	0.976466	0.973266
0.0852498	1.30468	1.30482	1.30321	1.30189	1.29967	1.29776	1.29466	1.2901	1.28321	1.27718	1.26772	1.258	1.2463	1.2308	1.21317	1.19428	1.17151	1.14383	1.11154	1.07508	1.03457	1.02464	1.01845	1.01271	1.00695	1.002	0.998764	0.995023	0.992674	0.990252	0.98831	0.986763	0.985739	0.984737	0.984054	0.983485	0.983501	0.98315	0.983158	0.982837	0.982806	0.982434	0.982265	0.981657	0.980601	0.979119	0.977816	0.975745	0.972685
0.0861596	1.3104	1.30994	1.30905	1.30808	1.30578	1.30323	1.30014	1.29499	1.28957	1.28177	1.27323	1.26319	1.24987	1.23493	1.21699	1.19747	1.17444	1.14704	1.11179	1.07613	1.03705	1.02585	1.01844	1.0129	1.00712	1.00323	0.999076	0.995243	0.993278	0.990852	0.98872	0.987073	0.98589	0.984996	0.0196833	0.983783	0.983332	0.983418	0.982909	0.982937	0.982696	0.982415	0.981838	0.981299	0.980153	0.978983	0.976907	0.97515	0.971985
0.0870588	1.31682	1.316	1.31423	1.31314	1.31097	1.30847	1.30447	1.30109	1.29475	1.28679	1.2783	1.26668	1.25413	1.23798	1.22012	1.20015	1.17569	1.14835	1.11303	1.07671	1.03802	1.02586	1.01907	1.01375	1.00719	1.00353	0.999751	0.995987	0.993759	0.991243	0.988761	0.987593	0.986479	0.985126	0.984424	0.983952	0.983591	0.983191	0.983138	0.982827	0.982586	0.982197	0.981579	0.980882	0.980117	0.978139	0.97673	0.973954	0.971433
0.0879551	1.32249	1.32204	1.32106	1.31838	1.31642	1.31395	1.31024	1.30538	1.2991	1.29163	1.2825	1.27206	1.25856	1.24111	1.22283	0.024047	1.17831	1.14848	1.11674	1.07772	1.03852	1.02601	1.01954	1.01405	1.00799	1.00378	1.00084	0.99639	0.993767	0.991956	0.989333	0.987824	0.98656	0.985425	0.984563	0.984131	0.98366	0.983152	0.983099	0.982768	0.982447	0.98188	0.98147	0.980726	0.978973	0.977942	0.976096	0.97326	0.969559
0.0888597	1.32829	1.32782	1.32658	1.32496	1.32126	1.31874	1.31489	1.3098	1.30362	1.29646	1.28723	1.2753	1.262	1.24722	1.22598	1.20615	1.17896	1.15135	1.11849	1.0802	1.03854	1.02658	1.02001	1.01439	1.00907	1.00447	1.00029	0.997628	0.994483	0.992005	0.989993	0.987985	0.987019	0.985827	0.984793	0.984131	0.983562	0.983369	0.983158	0.98259	0.98233	0.981851	0.981024	0.980297	0.978676	0.977257	0.975424	0.972711	0.969011
0.0897837	1.33438	1.33313	1.33246	1.33063	1.32779	1.32439	1.32083	1.31553	1.30825	1.30082	1.29125	1.28099	1.26668	1.24782	1.23044	1.20853	1.18298	1.15253	1.11819	1.08065	1.03975	1.0274	1.0216	1.01515	1.00994	1.00412	1.00128	0.998182	0.994823	0.992326	0.990375	0.988283	0.0197362	0.986427	0.985102	0.98429	0.98377	0.983262	0.98306	0.982551	0.982161	0.019628	0.980726	0.98002	0.97818	0.97724	0.974665	0.971702	0.967924
0.0906908	1.33956	1.33914	1.33799	1.33677	1.33334	1.33032	1.32635	1.31946	1.31386	1.30529	1.2953	1.28473	1.27014	1.25235	1.23401	1.20981	1.18671	1.15387	1.12033	1.0817	1.03998	1.02976	1.02157	1.01597	1.00981	1.00465	1.00182	0.998594	0.995728	0.992385	0.990584	0.988986	0.987129	0.986175	0.985513	0.984481	0.98386	0.98334	0.98293	0.98258	0.982259	0.981295	0.980329	0.979642	0.977747	0.976399	0.974118	0.970861	0.967201
0.0916287	1.34609	1.34546	1.34452	1.34203	1.33928	1.33487	1.33091	1.32552	1.31936	1.31022	1.30019	1.2887	1.27358	0.0251613	1.2374	1.21284	1.18788	1.1565	1.1228	1.08316	1.04112	1.03002	1.0219	1.01694	1.01096	1.00559	1.00231	0.998805	0.995748	0.993319	0.990463	0.988886	0.98768	0.986716	0.985673	0.984542	0.98398	0.983479	0.98296	0.982441	0.982003	0.981205	0.980181	0.979177	0.977251	0.975795	0.973819	0.969796	0.966149
0.0925395	1.35165	1.35113	1.34964	1.34749	1.34448	1.34052	1.33625	1.33148	1.32472	1.31455	1.30461	1.29297	1.27765	1.26193	1.24148	1.21653	1.19058	1.15818	1.12435	1.08559	1.04142	1.03106	1.02357	1.01668	1.01184	1.00657	1.00224	0.999258	0.996361	0.993068	0.991447	0.989397	0.98785	0.986706	0.985972	0.98476	0.984031	0.983489	0.982881	0.982274	0.981732	0.981136	0.979991	0.978761	0.976797	0.975144	0.972589	0.969023	0.965872
0.0934889	1.35706	1.35713	1.35554	1.35337	1.35023	1.34662	1.34168	1.33641	1.32891	1.32028	1.30879	1.29733	1.28171	1.26533	1.24356	1.22076	1.19121	1.16197	1.12639	1.08846	1.04241	1.03217	1.0239	1.01722	1.01234	1.00744	1.00322	0.999822	0.996461	0.993861	0.991305	0.989657	0.98825	0.986864	0.985924	0.985063	0.98408	0.983621	0.98294	0.982353	0.981605	0.980719	0.979594	0.978554	0.976433	0.974251	0.971189	0.968963	0.9642
0.0944192	1.36343	1.3623	1.36069	1.35904	1.35597	1.35228	0.0269525	1.34023	1.33395	1.32497	1.31307	1.29983	1.28564	1.2673	0.0249389	1.22332	1.19456	1.16557	1.12616	1.08873	1.04312	1.03277	1.02416	1.0177	1.0122	1.00813	1.00371	1.00027	0.996762	0.994655	0.991828	0.990117	0.988339	0.987126	0.986164	0.985019	0.984459	0.983511	0.982823	0.982204	0.981456	0.980573	0.979486	0.977839	0.976233	0.973318	0.971124	0.967729	0.963381
0.0953425	1.3689	1.36823	1.36689	1.36454	1.36195	1.35814	1.35227	1.34644	1.33832	1.33003	1.31638	1.30359	1.28895	1.27199	1.25157	1.22434	1.19794	1.16486	1.13167	1.08806	1.04354	1.03331	1.02438	1.01826	1.01305	1.0086	1.00453	1.00022	0.997296	0.994956	0.99243	0.990277	0.988741	0.987313	0.986013	0.985222	0.984331	0.98377	0.982781	0.981945	0.981317	0.980315	0.97935	0.977594	0.975461	0.972714	0.970473	0.966549	0.962654
0.0962369	1.37481	1.37444	1.37282	1.37072	1.36785	1.36269	1.35802	1.35101	1.34295	1.33406	1.32151	1.30833	1.29252	1.27357	1.25334	1.22808	1.19876	1.16821	1.13035	1.09004	1.04434	1.03384	1.0258	1.01937	1.01299	1.00893	1.00459	1.00127	0.997588	0.995097	0.992469	0.990699	0.988869	0.987595	0.986505	0.98523	0.98451	0.983611	0.982781	0.981708	0.981141	0.980154	0.979202	0.976966	0.975136	0.972512	0.969542	0.965775	0.960942
0.0971716	1.38111	1.38029	1.37892	1.37635	1.37316	1.36884	1.36288	1.356	1.34775	1.33783	1.32586	1.31238	1.2968	1.27798	1.25564	1.23013	1.19975	1.16848	1.13365	1.09044	1.04567	1.03523	1.0257	1.01954	1.01416	1.00915	1.00466	1.00148	0.998575	0.995015	0.993132	0.990979	0.98908	0.987846	0.986351	0.985521	0.984561	0.98367	0.982495	0.981767	0.98101	0.979866	0.978605	0.976782	0.974351	0.971946	0.969264	0.964766	0.959859
0.0980735	1.38674	1.38594	1.38465	1.38177	1.37756	1.37407	1.36809	1.36041	1.3522	1.34233	1.33127	1.31702	1.30001	1.28313	1.25963	1.23227	1.20485	1.16877	1.13464	1.09065	1.0468	1.0351	1.02623	1.02	1.01497	1.00977	1.00528	1.00143	0.998746	0.99593	0.992991	0.991522	0.98923	0.988146	0.986603	0.985649	0.0196856	0.98354	0.982754	0.981728	0.980764	0.97954	0.978218	0.976531	0.974058	0.971423	0.968289	0.96353	0.959774
0.0990022	1.39168	1.39181	1.38987	1.38672	1.38423	1.37951	1.37353	1.36554	1.35748	1.34729	1.33635	1.32019	1.30454	1.28527	1.26249	1.23579	1.20754	1.17325	1.13511	1.09318	1.04674	1.0365	1.02704	1.02085	1.01519	1.01023	1.00554	1.00174	0.999471	0.996454	0.993393	0.991418	0.989651	0.988477	0.986902	0.985501	0.984351	0.983801	0.982505	0.981818	0.980615	0.97917	0.977715	0.975739	0.973772	0.971031	0.967394	0.962771	0.95845
0.0999267	1.39811	1.39719	1.39533	1.39293	1.39007	1.38521	1.37833	1.37114	1.36223	1.35173	1.33872	1.32573	1.30742	1.28904	1.26487	0.0247948	1.21006	1.17409	1.1375	1.09344	1.04665	1.03645	1.0272	1.02139	1.01655	1.01079	1.00605	1.00267	0.99938	0.996182	0.994004	0.991903	0.990083	0.988617	0.986741	0.9859	0.984612	0.983672	0.982744	0.981537	0.980105	0.979211	0.97707	0.975178	0.973264	0.970466	0.967042	0.961758	0.957283
0.100831	1.40275	1.40229	1.4009	1.39864	1.39464	1.3902	1.38351	1.37593	1.36669	1.35661	1.34367	1.3296	1.31073	1.29071	1.26892	1.24342	1.21055	1.17824	1.13764	1.09398	1.04791	1.03601	1.02862	1.02251	1.01645	1.01116	1.00667	1.0034	0.999218	0.996705	0.994396	0.992213	0.990653	0.988597	0.987113	0.986042	0.984601	0.983642	0.982366	0.98145	0.980006	0.978607	0.977321	0.974725	0.972734	0.969378	0.965626	0.961837	0.95596
0.101755	1.40838	1.40855	1.40641	1.40358	1.39997	1.39511	1.38868	1.38194	1.37176	1.36192	1.34839	1.33269	1.31609	0.0258854	1.26983	1.24533	1.21526	1.17779	1.14123	1.09733	1.04831	1.03788	1.02863	1.02322	1.01634	1.01193	1.00786	1.00331	0.999984	0.997177	0.994667	0.992342	0.990653	0.988877	0.987583	0.986222	0.984591	0.983423	0.982595	0.980993	0.97984	0.978123	0.976693	0.97476	0.971901	0.968557	0.964962	0.96091	0.955139
0.102653	1.41586	1.41402	1.4117	1.40863	1.40549	1.4005	1.3938	1.38565	1.37731	1.36612	1.35337	1.33549	1.3197	1.29748	1.27397	1.24752	1.2162	1.18101	1.14231	1.09834	1.05012	1.03752	1.03008	1.02346	1.01727	1.01197	1.00776	1.0041	1.00033	0.997338	0.995028	0.992885	0.990793	0.989217	0.987253	0.986321	0.985021	0.983652	0.982166	0.981154	0.97983	0.978026	0.975801	0.97401	0.971137	0.967964	0.964349	0.959529	0.95393
0.103556	1.42164	1.42061	1.41796	1.41382	1.4096	1.40458	1.39905	1.39199	1.38245	1.37079	1.35657	1.34037	1.3209	1.30259	1.27711	1.25158	1.21942	1.18084	0.0228414	1.09887	1.05073	1.03861	1.03027	1.02356	1.01757	1.01247	1.00857	1.00457	1.00085	0.997921	0.995058	0.992836	0.990764	0.989548	0.988144	0.986071	0.984991	0.0196661	0.982148	0.980823	0.979474	0.977624	0.975843	0.972975	0.0194098	0.9679	0.963591	0.958848	0.0190706
0.104457	1.42756	1.42593	1.42375	1.41975	1.41647	1.40997	1.40394	1.39565	1.38681	1.37448	1.36102	1.34405	1.32556	1.30553	1.2813	1.25317	1.22089	1.183	1.14369	1.10076	1.05132	1.03923	1.03131	1.02387	1.01825	1.01262	1.00861	1.00473	1.0013	0.998284	0.995802	0.993327	0.991146	0.989669	0.988014	0.985961	0.984911	0.983452	0.982339	0.980776	0.979355	0.977189	0.975386	0.973107	0.970126	0.966525	0.963003	0.95767	0.952709
0.105373	1.43222	1.43151	1.42954	1.42652	1.42142	1.41603	1.40913	0.0280157	1.39161	1.37818	1.36545	1.34742	1.32937	0.0261699	1.28341	1.25613	1.22387	1.18444	1.14664	1.10141	1.05186	1.0402	1.03135	1.02517	1.01863	1.01328	1.00956	1.0048	1.00204	0.998294	0.995762	0.993537	0.991948	0.989738	0.987943	0.986221	0.984893	0.983574	0.982119	0.980766	0.979167	0.976931	0.974961	0.972564	0.968945	0.966882	0.962161	0.956489	0.950673
0.106314	1.4383	1.4376	1.43546	1.4313	1.42777	1.4214	1.41456	1.40608	1.39664	1.38368	1.36822	1.35279	1.33326	1.31242	1.28493	1.25861	1.22455	1.18862	1.14859	1.10331	1.05195	1.0405	1.03195	1.02566	1.0188	1.01456	1.00988	1.00584	1.0021	0.998706	0.996134	0.9941	0.991947	0.989768	0.987933	0.986181	0.985052	0.983574	0.981972	0.980737	0.978877	0.977014	0.974484	0.971773	0.969054	0.965442	0.960045	0.956631	0.950145
0.107238	1.44466	1.4438	1.44074	1.43782	1.43185	1.42688	1.41969	1.41094	1.40005	1.3891	1.37362	1.35637	1.3377	1.31447	1.28878	1.261	1.22699	1.19069	1.1483	1.10246	1.05429	1.03973	1.03245	1.02484	1.02033	1.01462	0.0202087	1.00629	1.00267	0.998937	0.996306	0.994038	0.992437	0.99021	0.988134	0.986341	0.985223	0.983385	0.98195	0.980459	0.978649	0.976247	0.974487	0.971397	0.967857	0.96419	0.960929	0.954992	0.9495
0.108124	1.45076	1.44781	1.4459	1.4431	1.43804	1.43215	1.42489	1.41574	1.4053	1.39218	1.37803	1.36149	1.34129	1.31715	1.29155	1.26334	1.22923	1.19173	1.15097	1.10225	1.05508	1.04138	1.03324	1.02664	1.02048	1.01473	1.01086	1.00608	1.00289	0.999532	0.996585	0.994571	0.992076	0.99047	0.988453	0.98658	0.984954	0.983535	0.98209	0.980013	0.978503	0.976328	0.973432	0.970796	0.967415	0.963877	0.959425	0.954492	0.948836
0.109031	1.45557	1.45419	1.45168	1.44833	1.44324	1.43833	1.43077	1.42136	1.40894	1.39726	1.38307	1.36469	1.34441	1.32034	1.2948	1.26653	1.23181	1.19557	1.15093	1.10714	1.05546	0.0208683	1.03416	1.02722	1.02093	1.01567	1.01148	1.00646	1.00282	0.999784	0.99727	0.994631	0.992236	0.99051	0.988243	0.986771	0.985314	0.983185	0.981962	0.979781	0.978354	0.975674	0.973217	0.970617	0.967223	0.962991	0.959075	0.953081	0.947189
0.109919	1.46095	1.46016	1.45649	1.45319	1.44834	1.44225	1.43495	1.42625	1.41383	1.40165	1.38711	1.36844	1.34762	1.32481	1.29692	1.26812	1.2331	1.19506	1.15377	1.10675	1.05686	1.04306	1.03478	1.02852	1.02114	1.01693	1.01147	1.00761	1.00323	0.999733	0.997673	0.994882	0.992446	0.990197	0.988754	0.986641	0.985414	0.983446	0.981802	0.979503	0.977609	0.975307	0.973017	0.970842	0.966341	0.962143	0.958616	0.951826	0.946606
0.110826	1.46665	1.4644	1.46245	1.45743	1.45363	1.44796	1.44046	1.43008	1.41826	1.406	1.39072	1.37241	1.35124	0.0265303	1.29939	1.27013	1.23622	1.19746	1.15742	1.10847	1.05712	1.0448	1.03521	1.02873	1.02231	1.01706	1.01178	1.00764	1.00424	1.00073	0.99732	0.995374	0.992457	0.990609	0.988424	0.987241	0.985213	0.983546	0.981213	0.979842	0.97691	0.975187	0.972905	0.96991	0.966349	0.961503	0.957047	0.95193	0.945223
0.111718	1.47176	1.47054	1.4685	1.46375	1.45828	1.45292	1.44492	1.4355	1.42325	1.41101	1.39478	1.37652	1.35287	1.32888	1.30438	1.27175	1.23721	1.20155	1.15668	1.1095	1.05831	1.0454	1.03637	1.02901	1.02264	1.01702	1.01254	1.00788	1.00422	1.00113	0.997752	0.995766	0.99327	0.990609	0.988935	0.986659	0.985345	0.983527	0.981304	0.979326	0.9769	0.974643	0.972091	0.969455	0.965505	0.961649	0.956343	0.95037	0.944415
0.112612	1.47822	1.47545	1.47314	1.47032	1.46436	1.45782	1.44993	1.43989	1.42842	1.41457	1.39858	1.38186	1.35784	0.0266516	1.30532	1.27382	1.24067	1.20116	1.15973	1.11077	1.05785	1.04607	1.03751	1.02927	0.0204692	1.01717	1.01334	1.00814	1.00457	1.0017	0.998295	0.995876	0.993009	0.99115	0.988774	0.986962	0.985113	0.019664	0.981484	0.979145	0.976613	0.974607	0.971735	0.968922	0.965211	0.960551	0.9557	0.948876	0.943089
0.113515	1.48291	1.48109	1.4796	1.47552	1.47055	1.46317	1.45436	1.44369	1.43362	1.41946	1.40291	1.38411	1.36162	1.33708	1.30779	1.27611	1.24205	1.20242	1.15911	1.11376	1.05895	1.04737	1.03686	1.02991	1.02373	1.01837	1.01296	1.00908	1.0053	1.00222	0.99756	0.996248	0.99335	0.990981	0.989154	0.986954	0.985392	0.982618	0.981104	0.979399	0.976757	0.974128	0.971092	0.968181	0.964352	0.960182	0.954208	0.94907	0.94205
0.114456	1.48779	1.48689	1.48487	1.48019	1.47512	1.46735	1.45948	1.44936	1.43692	1.42403	1.40604	1.38821	1.36544	1.33986	1.31161	1.28028	1.24403	1.20625	1.16167	1.11269	1.06025	1.04784	1.03844	1.0309	1.02371	1.0193	1.01404	1.00901	1.00524	1.00221	0.998989	0.995825	0.993481	0.991432	0.989225	0.986991	0.984923	0.982809	0.980806	0.979167	0.976619	0.974015	0.970334	0.967276	0.96403	0.958612	0.954822	0.94754	0.941759
0.115363	1.49453	1.49324	1.49046	1.48597	1.4807	1.47274	1.46405	0.0290625	1.44116	1.42779	1.41054	1.39115	1.36921	1.34436	1.31437	1.28176	1.24613	1.20751	1.16209	1.1127	1.0604	1.04923	1.0384	1.03183	1.02512	1.01903	1.01449	1.00982	1.00618	1.00186	0.998597	0.99657	0.993792	0.99136	0.989034	0.987402	0.984504	0.982769	0.980847	0.978512	0.976181	0.973455	0.97078	0.966824	0.963109	0.958172	0.95294	0.947738	0.940749
0.116295	1.49953	1.4989	1.49703	1.49197	1.48643	1.47845	1.47025	1.45804	1.4467	1.43124	1.4159	1.39401	1.37288	1.34561	1.31827	1.28353	1.24868	1.21053	1.16449	1.11533	1.06102	1.04999	1.03956	1.03146	1.02592	1.02023	1.01505	1.00988	1.00612	1.00268	0.999624	0.995916	0.994235	0.991501	0.989455	0.0197389	0.984502	0.983338	0.980279	0.977905	0.975775	0.973172	0.970385	0.966372	0.962305	0.958087	0.95217	0.946608	0.938711
0.117198	1.50533	1.50475	1.50248	1.49696	0.0298192	1.48363	1.47475	1.46341	1.45112	1.43602	1.4192	1.39797	1.37612	1.34845	1.32073	1.28783	1.25148	1.21006	1.16762	1.11725	1.06255	1.04987	1.04041	1.03185	1.02636	1.02085	1.01527	1.01107	1.00683	1.00283	0.99914	0.996982	0.993832	0.991752	0.989184	0.987044	0.984974	0.983168	0.979869	0.978059	0.975376	0.972477	0.970135	0.966071	0.96157	0.957477	0.951033	0.945564	0.937742
0.118101	1.51143	1.50992	1.5074	1.5017	1.49519	1.48875	1.48014	1.46751	1.45509	1.43935	1.4221	1.40311	1.37747	0.0270658	1.32187	1.29149	1.25281	1.21278	1.16664	1.11834	1.06232	1.05009	1.0402	1.03309	1.02715	1.02079	1.01535	1.01165	1.00748	1.00253	1.00011	0.996438	0.994234	0.991912	0.989315	0.987461	0.984754	0.982601	0.980142	0.977857	0.0195044	0.972747	0.96876	0.965744	0.960969	0.956952	0.950152	0.944469	0.018734
0.119021	1.51598	1.51492	1.51263	1.5076	1.5016	1.49324	1.48488	1.4728	1.46112	1.44306	1.4257	1.40565	1.38326	1.35538	1.32567	1.29399	1.25435	1.2147	1.16836	1.1188	1.06289	1.05093	1.04114	1.0336	1.02713	1.02151	1.01607	1.01143	1.00791	1.00354	0.999845	0.997082	0.994384	0.99156	0.989707	0.987634	0.984673	0.982342	0.980033	0.977669	0.975043	0.971972	0.968738	0.964626	0.960997	0.956253	0.948893	0.943575	0.936116
0.119932	1.5221	1.52055	1.51716	1.51303	1.5073	1.49955	1.48995	1.4788	1.4639	0.0289677	1.4306	1.41038	1.38648	1.3577	1.32891	1.29616	1.25753	1.21431	1.16955	1.11959	1.06427	1.05208	1.04146	1.0339	1.02776	1.02232	1.01622	1.01195	1.00846	1.00377	1.00019	0.997534	0.0198911	0.991693	0.989615	0.987023	0.984726	0.982413	0.0195978	0.977872	0.974692	0.971863	0.967695	0.964042	0.960117	0.955091	0.949018	0.942548	0.935438
0.12083	1.52697	1.52562	1.52216	1.51812	1.51295	0.0150453	1.49583	1.4832	1.46898	1.45293	1.43501	1.41444	1.38915	1.36101	1.33248	1.29886	1.25825	1.2165	1.16979	1.12225	1.06532	1.05159	1.04236	1.03507	1.02752	1.02232	1.01634	1.01272	1.0079	1.00462	1.0012	0.997534	0.994606	0.991973	0.989335	0.987182	0.984436	0.0196492	0.980055	0.977392	0.974508	0.971069	0.967538	0.0192804	0.958991	0.953986	0.947774	0.941846	0.934432
0.121724	1.53257	1.53208	1.52761	1.52318	1.51841	1.51001	1.4999	1.48846	1.47329	1.45703	1.44016	1.41623	1.39255	1.36501	1.33555	1.30098	1.26152	1.21674	1.17181	1.12341	0.0213317	1.05176	1.04252	1.03531	1.02922	1.02182	1.01747	1.01333	1.0085	1.00447	1.00156	0.998118	0.994785	0.991902	0.989444	0.987425	0.984626	0.982134	0.980094	0.976944	0.97381	0.970896	0.967339	0.963037	0.958925	0.952797	0.947501	0.940959	0.933468
0.122607	1.53816	1.53683	1.53343	1.52941	1.52303	1.51575	1.50461	1.49327	1.47722	1.46197	1.44195	1.41982	1.3954	1.37022	1.33948	1.30052	1.26361	1.22042	1.17297	1.12152	1.06819	1.05281	1.04301	1.03517	1.02969	1.02307	1.01708	1.01397	1.00903	1.00481	1.00148	0.998349	0.995046	0.992173	0.989355	0.987424	0.984667	0.982285	0.979618	0.976705	0.973582	0.970857	0.966177	0.96233	0.957685	0.953142	0.946144	0.940317	0.932935
0.123529	1.5424	1.54082	1.53828	1.53521	1.52904	1.51994	1.50986	1.49726	1.48279	1.46667	1.44726	1.4245	1.39977	1.37392	1.33906	1.30572	1.26701	1.22175	1.1734	1.12461	1.06771	1.05415	1.04506	1.03546	1.02952	1.02325	1.01851	1.01334	1.00961	1.00572	1.00185	0.999114	0.995006	0.992313	0.989845	0.986954	0.985007	0.981404	0.979501	0.976286	0.973256	0.969903	0.96603	0.962354	0.956858	0.952085	0.946221	0.939325	0.932293
0.124433	1.54751	1.54664	1.54423	1.53998	1.53361	1.52571	1.51436	1.50157	1.48723	1.47044	1.45286	1.42869	1.40369	1.37627	0.0268452	1.30803	1.26791	1.22327	1.17698	1.12606	1.06795	1.05484	1.04444	1.03739	1.02914	1.02398	1.01819	1.01401	1.01013	1.00601	1.00197	0.999074	0.995388	0.993366	0.989475	0.987093	0.984377	0.981458	0.978921	0.976211	0.973041	0.969536	0.965161	0.961833	0.956688	0.951632	0.94562	0.937991	0.930182
0.125348	1.55369	1.55228	1.54976	1.54562	1.53948	1.53111	1.51988	1.50763	1.49182	1.47421	1.45647	1.43431	1.40632	1.37884	1.34533	1.31076	1.26933	1.2271	1.18069	1.12168	1.0686	1.05528	1.04521	1.0366	1.03044	1.02426	1.01948	1.01394	1.01055	1.00544	1.00225	0.999103	0.996363	0.992914	0.989676	0.987245	0.983868	0.981785	0.978901	0.976421	0.972497	0.968846	0.965479	0.960768	0.955922	0.950717	0.943835	0.937368	0.929515
0.126238	1.55969	1.55808	1.55535	1.55074	1.54491	1.53704	1.5255	1.51119	1.49504	1.48005	1.4592	1.43741	1.4119	1.38077	1.34667	1.31318	1.27273	1.22798	0.0235981	1.12398	1.07054	1.055	1.04593	1.03752	1.03083	1.02475	1.01886	1.01534	1.01015	1.00657	1.00199	0.999516	0.996443	0.992865	0.989745	0.986775	0.983907	0.981838	0.97935	0.975579	0.972143	0.968612	0.965207	0.960876	0.954939	0.949425	0.943229	0.936742	0.928821
0.127135	1.56485	1.5634	1.56065	1.55531	1.54944	1.54163	1.52988	1.51599	1.5025	1.48345	1.46164	1.44088	1.41257	1.38535	1.34971	1.31521	1.27376	1.23066	1.18132	0.0225217	1.07064	1.0567	1.04684	1.03881	1.03113	1.02565	1.01958	1.01495	1.01072	1.00624	1.00247	0.999334	0.996694	0.993287	0.990107	0.986763	0.984298	0.981587	0.978594	0.975676	0.971844	0.968573	0.963751	0.959872	0.95485	0.948813	0.942901	0.935149	0.928424
0.128039	1.57004	1.56828	1.5653	1.55997	1.5538	1.54634	1.53567	1.52169	1.50557	1.4877	1.46677	1.44356	1.41856	1.38622	1.35471	1.31675	1.27639	1.23371	1.1812	1.12981	1.07052	1.05662	1.04772	1.03903	1.03219	1.02578	1.02023	1.01533	1.01098	1.00628	1.0031	0.999092	0.996885	0.993327	0.990558	0.986765	0.984381	0.981375	0.978424	0.975202	0.971249	0.967999	0.964428	0.959181	0.953551	0.948714	0.941571	0.934848	0.927086
0.128948	1.57497	1.57383	1.57083	1.56499	1.5594	1.55069	1.54029	1.52558	0.030216	1.49097	1.47071	1.44813	1.42023	1.39173	1.35755	1.31957	0.0255311	1.23588	1.18557	1.12911	1.07137	1.05809	1.04867	1.03958	1.03276	1.02713	1.01994	1.01527	1.01111	1.007	1.00297	1.00007	0.996494	0.993677	0.990317	0.987146	0.984208	0.98136	0.977788	0.974555	0.971577	0.96824	0.963224	0.958381	0.952927	0.947833	0.940931	0.934818	0.925263
0.129871	1.58056	1.57893	1.57612	1.57077	1.56431	1.55366	1.54512	1.53004	1.51469	1.49455	1.47459	1.45161	1.42415	1.39484	1.35926	1.31959	1.28124	1.23804	1.18756	1.13059	1.07165	1.05933	1.04903	1.0403	1.03352	1.02677	1.02169	1.01626	1.01084	1.00699	1.00342	1.00017	0.0199383	0.993588	0.990097	0.987545	0.98355	0.981292	0.978326	0.974407	0.970731	0.967575	0.962788	0.95788	0.952277	0.946802	0.939983	0.932579	0.925627
0.130786	1.5864	1.58478	1.58263	1.57661	1.57003	1.56029	1.54844	1.5344	1.51849	1.49952	1.47877	1.45539	1.42806	1.39704	1.36265	1.32307	1.28393	1.23749	1.18498	1.13224	1.07268	1.06088	1.0498	1.04219	1.03335	1.0274	1.02087	1.01753	1.01173	1.00716	1.00374	1.00046	0.996181	0.993699	0.990599	0.986816	0.983819	0.980972	0.977571	0.974278	0.970702	0.965919	0.96274	0.957733	0.952003	0.945954	0.939763	0.93254	0.922703
0.131703	1.59173	1.59062	1.58683	1.58227	1.57429	1.56544	1.55254	1.54053	1.52305	1.5045	1.48591	1.45992	1.43122	1.39842	1.36605	1.32595	1.28718	1.23736	1.18847	1.13357	1.07387	1.0611	1.05008	1.04248	1.03486	1.02725	1.02218	1.01674	0.020242	1.0081	1.00396	1.00023	0.996825	0.993108	0.990247	0.986584	0.983921	0.980723	0.977864	0.973869	0.970982	0.965787	0.961414	0.957237	0.95172	0.944863	0.939031	0.930122	0.922453
0.132626	1.59704	1.59528	1.59299	1.58675	1.58006	1.57112	1.55866	1.54467	1.52843	1.50853	1.48779	1.46235	1.43507	1.40396	1.36864	1.32804	1.28819	1.24251	1.189	1.13587	1.07396	1.06184	1.05063	1.04292	1.03501	1.02798	1.02181	1.01746	1.01258	1.00803	1.00467	1.00015	0.997035	0.993749	0.989396	0.986967	0.98388	0.980682	0.977732	0.973682	0.969484	0.966265	0.961005	0.956475	0.951018	0.94369	0.937463	0.930677	0.921798
0.133556	1.60237	1.6013	1.59743	1.59241	1.58505	1.57579	1.56331	1.54887	1.5343	1.51249	1.49122	1.46577	1.43765	0.0281339	1.36992	1.33134	1.29095	1.24363	1.19152	1.13772	1.07516	1.06189	1.05148	1.04328	1.03545	1.0288	1.02273	1.0176	1.01294	1.00832	1.00489	1.0006	0.996111	0.993447	0.990498	0.986704	0.983752	0.981374	0.976811	0.973369	0.969622	0.965415	0.961493	0.95562	0.949701	0.943551	0.936499	0.929805	0.920031
0.134474	1.6074	1.60647	1.60325	1.59721	1.58995	1.58218	1.56739	1.55358	1.53787	1.51864	1.49501	1.4693	1.4427	1.40923	1.37267	1.33535	1.29253	1.24487	1.19539	1.13842	1.07573	1.0626	1.05196	1.04344	1.03586	1.03001	1.02281	1.01829	1.01322	1.00835	1.0042	1.00099	0.996553	0.993749	0.990026	0.987097	0.984369	0.980277	0.977028	0.973296	0.969497	0.964252	0.960399	0.9551	0.949093	0.943161	0.93578	0.928431	0.9196
0.135376	1.61251	1.61178	1.60827	1.60325	1.59532	1.5868	1.57161	1.55865	1.54035	1.52273	1.50068	1.47414	1.44391	1.41171	1.376	1.33846	1.29151	1.24667	1.19627	1.13963	1.07616	1.06223	1.05256	1.04471	1.03616	1.02959	1.02415	1.01867	1.0131	1.00902	1.00447	1.00078	0.997126	0.993758	0.989845	0.987319	0.983711	0.980245	0.976731	0.019466	0.968234	0.963944	0.959674	0.954646	0.949003	0.942146	0.935154	0.927306	0.918902
0.136313	1.61853	1.61765	1.61502	1.60954	1.60109	1.59113	1.57797	1.56178	0.0309089	1.5249	1.50495	1.47853	1.44824	1.41548	1.37926	1.33875	1.29434	1.24596	1.19661	1.1417	1.07693	1.06378	1.0537	1.04408	1.03716	1.02991	1.02416	1.01873	1.01446	1.00944	1.00473	1.00051	0.997166	0.993717	0.990808	0.986456	0.983554	0.980296	0.976242	0.973192	0.968238	0.963783	0.959159	0.953673	0.948015	0.942125	0.93469	0.92543	0.917987
0.13724	0.0324787	1.62308	1.61988	1.61471	1.60657	1.59438	1.5816	1.56704	1.54931	1.53084	1.50832	1.48016	1.45158	1.41701	1.38279	1.34138	1.2981	1.25012	1.19446	1.14141	1.07912	1.06385	1.05442	0.0209083	1.03693	1.03093	1.02473	1.01905	1.01401	1.00969	1.00514	1.00104	0.997014	0.993758	0.989946	0.987065	0.984151	0.980067	0.975745	0.972507	0.967981	0.963274	0.958226	0.953621	0.0189415	0.941104	0.93398	0.925391	0.91728
0.138138	1.63024	1.62802	1.62453	1.6184	0.0322132	1.59955	1.58641	1.57119	1.55481	1.53391	1.5108	1.48473	1.45567	1.41846	1.38587	1.34469	1.29849	1.25161	1.19672	1.13846	1.08042	1.06479	1.05546	1.04515	1.03846	1.03143	1.02504	1.01945	1.0146	1.00928	1.00527	1.00133	0.997406	0.994329	0.990227	0.985974	0.983902	0.980108	0.976242	0.972127	0.967956	0.962383	0.957677	0.953192	0.945878	0.9409	0.933185	0.923615	0.916893
0.139011	1.63532	1.63419	1.6293	1.62311	1.61486	1.60546	1.59079	1.57669	1.55803	1.53728	1.5141	1.48784	1.45805	1.42423	1.38505	1.3448	1.30105	1.25312	1.19774	1.1447	1.08041	1.06576	1.0551	0.020923	1.03857	1.03178	1.02522	1.01975	1.01515	1.01005	1.0056	1.00081	0.99804	0.993949	0.990247	0.987095	0.982785	0.979379	0.975952	0.972185	0.967936	0.962292	0.957024	0.951487	0.945989	0.940121	0.932414	0.924115	0.914728
0.139921	1.64037	1.63781	1.6347	1.62771	1.61992	1.60819	1.59623	1.57854	1.56155	1.5428	1.51776	1.49045	1.4617	1.42746	1.38643	1.34808	1.30371	1.25288	1.20127	1.14318	1.0817	1.0651	0.0210906	1.04826	1.04	1.03168	1.02646	1.01993	1.01418	1.01017	1.00579	1.00178	0.997899	0.994128	0.990559	0.986546	0.983442	0.978921	0.975623	0.971554	0.966411	0.962733	0.956868	0.951304	0.944884	0.938762	0.932444	0.922965	0.9142
0.140834	1.64473	1.6435	1.63833	1.63286	1.62415	1.61377	1.60027	1.5826	1.56548	1.54465	1.52207	1.49326	1.46555	1.42795	1.39185	1.35049	1.305	1.25444	1.2032	1.14603	1.08212	1.0658	1.05554	1.04772	1.04036	1.03257	1.02663	1.02059	1.01505	1.01	0.0201233	1.00168	0.998191	0.993676	0.989995	0.986586	0.983523	0.979779	0.974923	0.971117	0.966193	0.962263	0.956679	0.949778	0.944608	0.937786	0.931014	0.922275	0.913332
0.141749	1.64955	1.64762	1.64342	1.63764	1.62969	1.61795	1.60402	1.58706	1.56951	1.54943	1.52437	1.49844	1.46796	1.43163	1.39156	1.35254	1.30761	1.25884	1.20319	1.1462	1.08386	1.06708	1.05558	1.04815	1.04051	1.03334	1.02682	1.02088	1.01543	1.01058	1.00635	1.00231	0.997557	0.994109	0.989834	0.986485	0.983264	0.979423	0.975481	0.971107	0.966013	0.961453	0.954986	0.950478	0.9437	0.936838	0.93003	0.921789	0.913225
0.14267	1.65481	1.65276	1.64805	1.642	1.63424	0.0324518	1.60729	1.59244	1.575	1.55265	1.52791	1.50352	1.47071	1.43447	1.39505	1.35464	1.30812	1.26146	1.20409	1.14758	1.0832	1.06768	1.05755	1.04925	1.04085	1.03388	1.02711	1.02083	0.0203156	1.01149	1.0057	1.00249	0.997607	0.993897	0.990227	0.986796	0.983054	0.978611	0.9755	0.971005	0.96566	0.960496	0.95543	0.948788	0.0188651	0.93655	0.928764	0.920865	0.912295
0.143561	1.66109	1.65833	1.65324	1.64697	1.63797	1.62639	1.61366	1.59721	1.57872	1.55636	1.53343	1.5052	1.47344	1.43876	1.39828	1.35712	1.30972	1.26081	1.20706	1.14957	1.08325	1.06762	1.05766	1.04976	1.04177	1.03365	1.02727	1.02153	1.01695	1.01079	1.00648	1.00232	0.998141	0.993897	0.989974	0.986867	0.982543	0.979494	0.974575	0.970175	0.965628	0.0192025	0.954433	0.948642	0.94253	0.935773	0.927936	0.91962	0.910963
0.1445	1.66605	1.66387	1.65854	1.65144	1.64205	1.63235	1.61779	1.60185	1.58251	1.56103	1.53705	1.5082	1.47822	1.44061	1.40067	1.35993	1.31434	1.26185	1.20735	1.14906	1.08527	1.06863	1.05908	1.04973	1.04201	1.03388	1.02781	1.02244	1.01651	1.01149	1.00688	1.00299	0.99811	0.993887	0.990416	0.986715	0.982367	0.978955	0.974446	0.969371	0.964626	0.959397	0.954868	0.948373	0.942255	0.935193	0.926984	0.918795	0.90998
0.145412	1.6709	1.66944	1.66302	1.65613	1.64685	1.637	1.62237	1.60461	1.58868	1.56585	1.54024	1.51125	1.4801	1.44444	1.40416	1.36124	1.31715	1.26125	1.21001	1.14928	1.08561	1.07026	1.06001	1.04998	1.04263	1.03488	1.02817	1.02264	1.01701	1.01177	1.00674	1.00244	0.998271	0.994278	0.990196	0.985949	0.982074	0.978906	0.973972	0.969535	0.96446	0.959264	0.954079	0.947406	0.940943	0.93458	0.927217	0.917773	0.908282
0.146315	1.6759	1.674	1.66871	1.66197	1.65255	1.64176	1.62724	1.61045	1.59243	1.56936	1.54313	1.51616	1.48279	1.4473	1.40782	1.36413	1.31803	1.26444	1.20782	1.15122	1.08584	1.07108	1.06097	1.05047	1.04271	1.03569	1.02887	1.02302	1.01736	1.01175	1.00734	1.00267	0.997768	0.994057	0.990428	0.986014	0.981888	0.977887	0.97368	0.969902	0.964265	0.958729	0.953578	0.947525	0.940507	0.933867	0.0185158	0.916313	0.90789
0.147225	1.68029	1.679	1.67311	1.66661	1.65741	1.64543	1.63221	1.61637	1.59638	1.57457	1.54621	1.521	1.48526	1.44963	1.40971	1.36752	1.32035	1.26342	1.21174	1.14975	1.08697	1.07193	1.06085	1.05046	1.04415	1.0353	1.0297	1.02275	1.01876	1.01163	1.00703	1.00361	0.998834	0.993334	0.989506	0.986218	0.982177	0.977516	0.973032	0.969332	0.964615	0.958814	0.952657	0.945861	0.940439	0.932294	0.926129	0.916814	0.907034
0.148137	1.68535	1.68412	1.67779	1.67178	1.66158	1.65061	1.6376	1.62021	1.60083	1.5779	1.55091	1.52154	1.48897	1.45273	1.41056	1.3693	1.32178	1.26912	1.2104	1.15273	1.08695	1.0726	1.06063	1.05239	1.0435	1.03613	1.02882	1.02391	1.01884	1.01265	1.0078	1.00296	0.998321	0.994158	0.990319	0.985357	0.981266	0.977662	0.973203	0.969259	0.963444	0.958251	0.951948	0.946316	0.939132	0.932181	0.924783	0.915794	0.905918
0.149045	0.0338101	1.68829	1.68352	1.6763	1.66658	1.65514	1.6409	1.62535	1.60425	1.58022	1.556	0.0305006	1.48941	1.45792	1.41544	1.37188	1.32335	1.27161	1.2111	1.15367	1.08766	1.07274	1.06209	1.05272	1.04359	1.037	1.02925	1.02384	1.0189	1.01316	1.00814	1.00285	0.998714	0.993727	0.990258	0.985507	0.981276	0.977329	0.973203	0.968204	0.963335	0.957919	0.951353	0.946052	0.939021	0.930861	0.923444	0.915131	0.0181021
0.149956	1.6957	1.69234	1.68913	1.68127	1.67272	1.66036	1.6451	1.62928	1.60844	1.58526	1.55929	1.5268	1.49734	1.45829	1.41809	1.37382	1.32561	1.27316	1.21493	1.15341	1.08793	1.07337	1.06249	1.05251	1.04474	1.03734	1.02954	1.02386	1.01822	1.01375	1.00807	1.00338	0.998622	0.993896	0.990056	0.0197085	0.0196396	0.976883	0.972797	0.967748	0.962707	0.957976	0.951111	0.945271	0.937663	0.931307	0.922387	0.913279	0.904508
0.150849	1.70041	1.69775	1.69317	1.68637	1.67717	1.66535	1.64935	1.6329	1.61208	1.58855	1.56105	1.5315	1.49858	1.4615	1.42171	1.37677	1.32784	1.27509	1.21702	1.15575	1.08894	1.07421	1.06274	1.05357	1.04499	0.0207455	1.03013	1.02424	1.01886	1.01379	1.0085	1.0027	0.998753	0.994861	0.989534	0.985866	0.981568	0.976123	0.972739	0.968031	0.96301	0.956405	0.950852	0.944484	0.937324	0.0186103	0.921775	0.913556	0.903288
0.151744	1.70581	1.7025	1.69783	1.69189	1.68292	1.66925	1.65448	1.63691	1.61573	1.59182	1.56611	1.53766	1.50112	1.46333	1.42168	1.3772	1.33286	1.2764	1.21879	1.15678	1.08911	1.07445	1.06389	1.05336	1.04628	1.03779	1.03129	1.02484	1.01899	1.01335	1.00888	1.00311	0.998622	0.99432	0.989686	0.984874	0.981476	0.976815	0.972214	0.96769	0.961887	0.956712	0.950811	0.943395	0.936595	0.929752	0.921559	0.9125	0.902073
0.152666	1.71114	1.70893	1.70352	1.6974	1.68701	1.67429	1.65751	1.64182	1.62163	1.5972	1.56869	1.53917	1.5041	1.46508	1.42436	1.3815	1.33169	1.27873	1.22133	0.0231771	1.08994	1.07457	1.06374	1.05497	1.04725	1.03813	1.03142	1.02495	1.01911	1.01431	1.0089	1.00272	0.999116	0.994831	0.989454	0.985157	0.980719	0.976744	0.972482	0.967433	0.961479	0.955752	0.950683	0.943834	0.93561	0.928511	0.919882	0.911365	0.900952
0.153541	1.71559	1.71314	1.70855	1.7018	1.69164	1.67829	1.66427	1.64608	0.0325174	1.6015	1.57486	1.54073	1.50636	0.0293701	1.42797	1.38317	1.33287	1.27937	1.2223	1.1622	1.09055	1.07684	1.06483	1.05425	1.04681	1.03881	1.03247	1.02488	1.01976	1.01447	1.0093	1.00348	0.998351	0.994669	0.989785	0.984726	0.980919	0.976715	0.97176	0.96708	0.961516	0.955416	0.949564	0.94319	0.936222	0.926316	0.919684	0.90988	0.900839
0.15446	1.72054	1.71751	1.71336	1.70599	1.69578	1.68327	1.66833	1.65067	1.62933	1.60533	1.57679	1.54644	1.51008	1.47317	1.43069	1.3849	1.33394	1.2826	1.22236	1.1612	1.09259	1.07732	1.06432	1.05525	1.04633	1.03967	1.03188	1.02625	1.01915	1.0147	1.00952	1.00375	0.999387	0.993895	0.990276	0.984807	0.979921	0.977086	0.971458	0.966184	0.96056	0.955468	0.949433	0.942438	0.935268	0.926872	0.918142	0.90972	0.898953
0.155366	1.72538	1.72331	1.71728	1.71049	1.70135	1.6893	1.67247	1.65409	1.63368	1.60913	1.58054	1.54963	1.5154	1.4747	1.43274	1.38718	1.33745	1.28194	1.22283	1.16084	1.09358	1.07789	1.06567	1.05628	1.04672	1.03991	1.03245	1.02601	1.01972	1.01479	1.00872	1.00383	0.999779	0.994911	0.989664	0.984145	0.981043	0.976508	0.970737	0.966463	0.960214	0.95507	0.948111	0.94215	0.933973	0.926262	0.918401	0.0181728	0.89894
0.156277	1.73093	1.7279	1.72233	1.71598	1.70616	1.69268	1.67685	1.65806	1.63704	1.61258	1.5851	1.55145	1.51686	1.47921	1.43563	1.38901	1.33952	1.28378	1.22426	1.16066	1.09343	1.0782	1.06591	1.05731	1.04859	1.03989	1.0324	1.02595	1.02038	1.01458	1.00902	1.00408	0.999215	0.994941	0.989567	0.984966	0.980533	0.976406	0.970821	0.965607	0.959304	0.954134	0.948985	0.941537	0.933373	0.925658	0.917676	0.907593	0.898167
0.157186	1.73488	1.73337	1.72768	1.71934	1.71012	1.69731	1.68085	1.66299	1.64128	1.61644	1.5883	1.55491	1.52047	1.4818	1.43793	1.39143	1.34194	1.28708	1.22685	1.16161	1.0944	1.07808	1.06745	1.05804	1.04866	1.04103	1.0326	1.02593	1.0202	1.01487	1.00908	1.00418	0.99989	0.995674	0.989907	0.984717	0.979791	0.97576	0.970933	0.964768	0.959834	0.953978	0.947357	0.941092	0.932525	0.924608	0.917712	0.906711	0.896089
0.158107	1.74037	1.73817	1.73348	1.72377	1.71388	1.70029	1.68671	1.66712	1.64544	1.621	1.59076	1.55945	1.52325	1.48416	1.4395	1.3942	1.34313	1.2883	1.22881	1.16237	1.09454	1.08027	1.06769	1.0585	1.04934	1.04053	1.03329	1.02666	1.02122	1.01395	1.00963	1.00437	0.999265	0.995202	0.989958	0.985005	0.980582	0.974816	0.970081	0.964498	0.959824	0.952673	0.947726	0.939712	0.932247	0.925125	0.915052	0.90739	0.895033
0.159013	1.74448	1.74291	1.73762	1.73015	1.71877	1.70496	1.6905	1.67108	1.64971	1.62436	1.59304	1.5655	1.52834	1.48629	1.44371	1.39633	1.34509	1.28943	1.22866	1.16161	1.09617	1.07944	1.06902	1.05776	1.04939	1.04093	1.03404	1.02678	1.02058	1.01554	1.00963	1.00474	0.999698	0.994439	0.989727	0.984485	0.980211	0.975647	0.969064	0.964707	0.958943	0.95274	0.94648	0.938982	0.93216	0.924049	0.915015	0.905881	0.894348
0.15994	0.0349945	1.74739	1.74363	1.73493	1.72481	1.71124	1.69422	1.67394	1.65297	1.62808	1.59748	1.56636	1.5305	1.4912	1.4469	1.39717	1.34622	1.29053	1.23007	1.16415	1.09655	1.08002	1.06871	1.05848	1.05022	1.04191	1.03376	1.02714	1.02114	1.01575	1.01041	1.00428	0.999497	0.995153	0.989574	0.984569	0.979652	0.974674	0.970013	0.963942	0.958484	0.952745	0.94515	0.938967	0.931487	0.923511	0.913762	0.904587	0.893581
0.160848	1.75545	1.7529	1.7473	1.73933	1.72875	1.71605	1.69963	1.67928	1.65674	1.6308	1.60106	1.57008	1.53191	1.49251	1.45091	1.39986	1.34899	1.29189	1.23037	1.16665	1.09658	1.07981	1.07077	1.05986	1.05126	1.0412	1.03443	1.02792	1.02136	1.01541	1.01061	1.00435	0.999457	0.994881	0.990288	0.984274	0.979394	0.974387	0.969766	0.963828	0.958564	0.951704	0.944995	0.938516	0.930318	0.922485	0.91403	0.903166	0.891838
0.161749	1.76077	1.75785	1.75137	1.74418	1.73216	1.72086	1.70385	1.68439	1.66094	1.63422	1.6061	1.57217	1.5363	1.49531	1.45345	1.40111	1.35298	1.29315	1.23047	1.16847	1.09711	1.08097	1.07112	1.06008	1.05186	1.04227	1.03467	1.02853	1.02101	1.01595	1.01026	1.00531	0.999497	0.994729	0.990136	0.984457	0.979555	0.974387	0.969424	0.0192707	0.956925	0.951643	0.944787	0.937579	0.93027	0.921975	0.912125	0.902695	0.891718
0.162657	1.76559	1.76202	1.75727	1.74793	1.73879	1.72449	1.70833	1.68693	1.66506	1.64028	1.61025	0.015748	1.53977	1.49904	1.45372	1.40707	1.35449	1.29574	1.2313	1.16821	1.09851	1.0823	1.07122	1.06071	0.0210539	1.04268	1.03432	1.02845	0.0204427	1.01661	1.01009	1.00526	0.999033	0.995091	0.988953	0.984669	0.980194	0.974039	0.969087	0.963301	0.956144	0.95154	0.944613	0.93655	0.929886	0.921068	0.911722	0.902144	0.89104
0.163575	1.76984	1.76714	1.76184	1.75389	1.74337	1.72974	1.71258	1.69146	1.66924	1.64294	1.61228	1.57945	1.54334	1.50282	0.0291048	1.40771	1.35559	1.29569	1.23484	1.16949	1.09933	1.08261	1.07153	1.06161	1.05201	1.04318	1.03561	1.02858	1.02335	1.01643	1.01076	1.00448	0.999355	0.994429	0.989978	0.984337	0.978925	0.973791	0.968858	0.962737	0.95702	0.95068	0.944018	0.936306	0.929379	0.919651	0.910354	0.900759	0.891254
0.164467	1.77473	1.77237	1.7662	1.75867	1.74894	1.73361	1.71694	1.69578	1.67328	1.64617	1.61615	1.58373	1.54607	1.50498	0.0291763	1.41114	1.35322	1.29744	1.23864	1.1708	1.09986	1.08311	1.0723	1.06136	1.05352	1.04338	1.03628	1.02931	1.02266	1.01678	1.01088	1.00521	0.999778	0.994348	0.988812	0.984422	0.979306	0.973942	0.968479	0.962518	0.95586	0.950534	0.943135	0.936743	0.927598	0.919463	0.909942	0.899601	0.89086
0.165384	1.78005	1.77707	1.77124	1.76265	1.75297	0.0347436	1.72065	1.69856	1.67681	1.65058	1.6203	1.58602	1.54975	1.50734	1.46235	1.41214	1.35823	1.29872	1.23901	1.17084	1.10051	1.08524	1.07238	1.06129	1.05364	0.02088	1.03658	1.03	0.0204742	1.01585	1.01129	1.00538	0.999043	0.99461	0.989277	0.984105	0.979167	0.973465	0.968424	0.962759	0.955079	0.949593	0.942519	0.935832	0.927768	0.918449	0.909559	0.899674	0.889234
0.166281	1.78461	1.78127	1.77663	1.7681	1.7566	0.0348431	1.72442	1.70478	1.6805	0.0331063	1.62097	1.59201	1.55117	1.50865	1.46384	1.41582	1.36193	1.29891	1.24043	1.16956	1.10109	1.08482	1.07429	1.06138	1.05385	1.04471	1.03694	1.02988	0.0204634	1.01722	1.01105	1.00583	0.999497	0.993816	0.989445	0.983897	0.978686	0.973761	0.967247	0.963047	0.954942	0.949259	0.941897	0.935615	0.927076	0.917114	0.90929	0.899783	0.88768
0.167171	1.78966	1.78702	1.78125	1.77259	1.76093	1.74655	1.72914	1.70895	1.68527	1.65753	1.62707	1.5945	1.5562	1.51091	1.46531	1.4174	1.36338	1.30354	1.23954	1.17257	1.1016	1.08647	1.07458	1.06154	1.05399	1.04533	1.03732	1.03054	1.02336	1.01737	1.01117	1.0059	0.99992	0.994206	0.989467	0.983237	0.978928	0.972921	0.967872	0.961582	0.954994	0.947941	0.941389	0.935489	0.927281	0.916146	0.908129	0.898079	0.886381
0.168077	1.79469	1.79182	1.78452	1.77833	1.76668	1.75238	1.73403	1.7123	1.68905	1.66102	1.63038	1.59687	1.55841	1.51397	1.46838	1.41806	1.36466	1.30893	1.24067	1.17188	1.10115	1.08746	1.07399	1.06306	1.05322	1.04481	1.03864	1.03056	1.02397	1.01777	1.01172	1.0058	1.00039	0.993898	0.988371	0.983208	0.979079	0.972721	0.967183	0.961155	0.954615	0.948291	0.941754	0.00932934	0.925024	0.917149	0.908031	0.895754	0.887922
0.168988	1.79997	0.0359337	1.79025	1.78206	1.77136	1.75542	1.73927	1.71745	1.6929	1.66631	1.63269	1.59953	0.0312181	1.51552	1.4706	1.42159	1.36476	1.30836	1.24104	1.17452	1.10213	1.0868	1.07598	1.0629	1.05399	1.04609	1.03832	1.03121	1.02413	1.01758	1.01225	1.00565	1.00018	0.994038	0.988294	0.983907	0.977456	0.972798	0.966338	0.961202	0.95418	0.948655	0.939185	0.933412	0.924872	0.915814	0.907199	0.897093	0.885729
0.169883	1.80409	1.80065	1.79468	1.78816	1.77373	1.76018	1.74252	1.72257	1.69695	1.6699	1.6376	1.60159	1.5634	1.52034	1.47314	1.42234	1.36786	1.30665	1.245	1.17436	1.10311	1.0872	1.07486	1.06389	1.05533	1.04639	1.03836	1.03108	1.02419	1.01848	1.01245	1.00604	0.999869	0.994317	0.988313	0.982785	0.978342	0.97225	0.966974	0.959817	0.955127	0.946062	0.939879	0.932741	0.0184832	0.915429	0.905941	0.895973	0.885087
0.170783	1.80837	1.8059	1.80077	1.79135	1.78027	1.76501	1.7467	1.72542	0.0340313	1.67194	1.64043	1.60596	1.56568	1.52224	1.47428	1.42536	1.36897	1.31018	1.24416	1.17455	1.10485	1.08858	1.07552	1.06515	1.0548	1.04705	1.03872	1.03219	1.02478	1.01768	1.01243	1.00606	1.00014	0.994528	0.988131	0.982699	0.977681	0.97244	0.966332	0.960107	0.953897	0.946163	0.939519	0.930842	0.92349	0.915393	0.905627	0.89511	0.88448
0.171711	1.8137	0.0362206	1.80495	1.79536	1.78439	1.76893	1.75086	1.72967	1.70381	1.67542	1.64408	1.60863	1.56874	1.52616	1.47687	1.42662	1.37269	1.31265	1.24512	1.17692	1.10544	1.08945	1.07591	1.06448	1.05553	1.04732	1.03977	1.03138	1.0252	1.01861	1.0127	1.00571	1.00084	0.994268	0.988572	0.9832	0.977452	0.971335	0.965923	0.959661	0.953702	0.945663	0.939201	0.930754	0.922528	0.913942	0.905138	0.89535	0.882873
0.172605	1.81846	1.81606	1.809	1.79958	1.78757	1.7739	1.75379	1.73466	1.70883	1.67836	1.64668	1.61157	1.57086	1.52813	1.4818	1.42787	1.37368	1.31036	1.24854	1.17998	1.10584	1.08963	1.07619	1.06547	1.05644	1.04708	1.0394	1.03199	1.02535	1.01911	1.01228	1.00699	0.999909	0.9948	0.988665	0.98264	0.977552	0.971773	0.96563	0.959096	0.952847	0.945596	0.937917	0.930357	0.922186	0.913664	0.904995	0.89385	0.882562
0.173503	0.0364698	1.82052	1.8151	1.80415	1.79274	1.77826	1.75878	0.0347592	1.71283	1.68231	1.65157	1.61192	1.57477	1.53019	1.48348	1.42969	1.37451	1.3157	1.24764	1.1788	1.10742	1.08892	1.07648	1.06615	1.0571	1.04749	1.04003	1.03211	1.02566	1.0194	1.01269	1.00588	1.00027	0.995312	0.988565	0.983061	0.976703	0.971397	0.96522	0.958675	0.952823	0.945375	0.937505	0.929965	0.921127	0.913413	0.904691	0.891722	0.881803
0.17443	1.82851	1.82584	1.81772	1.80852	1.79617	1.78158	1.76336	1.74164	1.71855	0.0337472	1.6523	1.61887	1.57786	1.53341	1.48389	1.4308	1.37675	1.31703	1.25078	1.18099	1.10739	1.0908	1.07632	1.06696	1.05703	1.04879	1.03928	1.03228	1.0253	1.01916	1.01383	1.00605	1.00034	0.994409	0.988978	0.982831	0.977059	0.0194102	0.965243	0.958807	0.951181	0.945201	0.937503	0.0185909	0.921064	0.913207	0.902155	0.89187	0.880269
0.175336	0.0366302	1.82877	1.82357	1.81303	0.0360369	1.78602	1.76901	1.7468	1.71969	1.69126	1.65689	1.61987	1.581	1.5347	1.4864	1.43221	1.37796	1.3165	1.25158	1.18051	1.10862	1.08953	1.07746	1.06779	1.05792	1.04797	1.04104	1.03229	1.02516	1.01924	1.01371	1.00661	1.0005	0.994006	0.988955	0.983143	0.976538	0.970398	0.964721	0.958727	0.950723	0.944395	0.938041	0.928183	0.921047	0.911945	0.901871	0.889883	0.879878
0.176254	0.0367344	1.83286	1.82691	1.81785	1.80683	1.79117	1.77361	1.74979	1.72524	1.69626	1.66054	1.62342	1.58271	1.53855	1.48875	1.43638	1.37738	1.31922	1.25213	1.18028	1.10917	1.09225	0.0215524	1.06816	1.05802	1.04946	1.04027	1.03414	1.02574	1.01892	1.01303	1.00693	1.0007	0.99469	0.988945	0.982149	0.976503	0.97131	0.964344	0.958167	0.950137	0.944348	0.9366	0.928607	0.920273	0.910755	0.901301	0.889922	0.87841
0.17717	1.84157	1.83791	1.83219	1.82441	1.81106	1.79586	1.77821	1.75301	1.72728	1.69723	1.66584	1.62631	1.58548	1.54088	1.49184	1.43716	1.38179	1.31905	1.25131	1.18326	1.10973	1.09158	1.07775	1.0677	0.0211842	1.05032	1.04129	1.03393	1.02674	1.01968	1.01347	1.00624	0.999769	0.995111	0.988953	0.982371	0.976428	0.97034	0.964388	0.957556	0.950932	0.94349	0.018711	0.928397	0.918444	0.911444	0.899525	0.889088	0.877818
0.178074	1.8449	1.84239	1.83718	1.82791	1.81493	1.80129	1.78202	0.0351689	1.73206	1.69928	1.66846	1.62935	1.58767	1.54268	1.49495	1.44196	1.38302	1.31956	1.25313	1.1836	1.11035	1.0926	1.07952	1.06866	1.05835	1.05056	1.04256	1.03376	1.02623	0.0204006	1.01358	1.00619	1.00067	0.994831	0.988281	0.982853	0.976363	0.97062	0.9637	0.957125	0.951036	0.943022	0.934884	0.927526	0.918371	0.0181809	0.899975	0.887903	0.877635
0.178992	1.84896	1.84855	1.84092	1.83206	1.81937	1.80448	1.78418	1.76367	1.73316	1.70384	1.67112	1.63337	1.59059	1.54719	1.49639	1.44353	1.38243	1.32168	1.2527	1.1854	1.11116	1.09367	1.07939	1.06984	1.05993	1.05032	1.04195	1.0343	1.02697	1.02046	1.01407	1.00671	0.999979	0.993977	0.989095	0.983695	0.975864	0.0193818	0.963838	0.957153	0.950384	0.941587	0.934838	0.926904	0.918174	0.908663	0.897474	0.888941	0.876443
0.179905	0.0370932	1.85166	1.84502	1.83517	1.82516	1.80824	1.78771	1.76629	1.73785	1.70804	1.67401	1.63542	1.59328	1.54999	1.49889	1.44449	1.38511	1.32229	1.2575	1.18499	1.11192	1.09377	1.08167	1.06921	1.06078	1.05026	1.04191	1.03522	1.02753	1.0203	1.01364	1.00682	1.00055	0.993996	0.988455	0.982589	0.976438	0.969301	0.963334	0.957196	0.949741	0.941501	0.934622	0.925752	0.918316	0.90741	0.89685	0.887295	0.87671
0.180808	1.85953	1.85528	1.84898	1.8398	1.8289	1.81272	1.79029	1.76894	1.7431	1.71273	1.67555	1.63816	1.59697	1.55053	1.50291	1.44757	1.38737	1.32255	1.25991	1.1876	1.11231	1.09395	1.08277	1.07032	1.06088	1.05091	1.0432	1.03485	1.02763	1.02012	1.01355	0.0201366	1.00085	0.993644	0.988106	0.983043	0.975696	0.969159	0.963466	0.956646	0.948881	0.942383	0.933821	0.925018	0.916703	0.906901	0.897055	0.88613	0.875221
0.181716	1.86325	1.86008	1.85344	0.0368889	1.83218	1.81462	1.79521	1.77206	1.74509	1.71541	1.67919	1.64286	1.60003	1.55448	1.50382	1.44944	1.38921	1.32624	1.25824	0.0237829	1.11218	1.09619	1.08362	1.07059	1.06127	1.05184	1.04231	1.03515	1.028	1.02059	1.01346	1.00722	1.00075	0.994488	0.987986	0.982371	0.975657	0.969829	0.0192542	0.956234	0.948551	0.941101	0.93302	0.924727	0.915143	0.907527	0.896469	0.886179	0.874473
0.182606	1.86786	1.86346	1.85907	1.84933	1.83546	1.81885	1.79898	0.0355246	1.75006	1.71633	1.68407	1.64432	0.0320807	1.55539	1.50635	1.45132	1.39132	1.32842	1.25849	1.18926	1.11319	1.09645	1.08237	1.07235	1.06134	1.05082	1.044	1.03517	1.02788	1.02061	1.01359	1.00756	1.0014	0.993362	0.988427	0.982152	0.97565	0.969825	0.96329	0.955562	0.947738	0.939655	0.93346	0.924288	0.91526	0.906017	0.896801	0.885631	0.872947
0.183494	1.87357	1.87032	1.86314	0.037054	1.83988	1.8222	1.80183	1.78018	1.75245	1.72381	1.68515	1.64749	1.60775	1.55748	1.50719	1.45226	1.39338	1.33116	1.26036	1.18744	1.11369	1.09738	1.08409	1.07173	1.06114	1.05349	1.04337	1.0352	1.02775	1.02092	1.01464	1.00725	1.00083	0.994028	0.988384	0.981941	0.975112	0.969803	0.962493	0.955642	0.947406	0.940144	0.93205	0.923408	0.91448	0.018132	0.895714	0.884323	0.873665
0.184394	1.87933	1.87683	1.86757	1.8564	1.84571	1.82686	1.80774	0.0357027	1.75686	1.7255	1.69129	1.65182	1.60791	1.56019	1.51015	1.45226	1.39573	1.3313	1.2601	1.19009	1.11445	1.09716	1.08446	1.0728	1.06259	1.05255	1.04475	1.03577	1.02871	1.02019	1.01466	1.00761	1.00076	0.9945	0.988325	0.98124	0.974534	0.968634	0.961819	0.95496	0.948811	0.939775	0.931781	0.92408	0.914372	0.904461	0.894714	0.884177	0.873172
0.185308	1.88406	1.88149	1.87343	1.86127	1.84847	1.83146	0.0362691	1.78607	1.75955	1.73033	1.6937	1.65293	1.61059	1.56262	1.51115	0.0291508	1.39721	1.33272	1.26118	1.19253	1.11407	1.09786	1.08359	1.074	1.06313	1.05307	1.04396	1.03619	1.02888	1.02112	1.01483	1.00832	1.0002	0.994307	0.987966	0.980991	0.0194866	0.968805	0.962241	0.954363	0.94756	0.939233	0.931879	0.922472	0.914247	0.904668	0.893362	0.883275	0.873036
0.186225	1.88855	1.88483	1.87784	1.86745	1.85283	1.83694	1.81748	1.79063	1.76259	1.73372	1.69436	1.65678	1.61406	1.56529	1.51438	1.45918	1.398	1.3332	1.26489	1.19332	1.115	1.09879	1.08552	1.07357	1.06246	1.05366	1.04404	1.03617	1.02933	1.02171	1.01491	1.00777	1.00088	0.995101	0.987683	0.0196178	0.975131	0.968041	0.960921	0.954955	0.947058	0.937425	0.931698	0.922248	0.914121	0.903622	0.89279	0.883226	0.871876
0.187128	1.89315	1.88919	1.88358	1.87156	1.85839	1.84138	0.0363999	1.79584	1.76624	1.73458	1.6984	1.66013	1.61649	1.56808	1.51517	1.4624	1.40156	1.33534	1.26319	1.19445	1.11524	1.09857	1.08624	1.07404	1.0641	1.05344	1.04495	1.03671	1.02862	1.02241	1.01464	1.00798	1.00075	0.99492	0.98722	0.981904	0.974815	0.967845	0.961367	0.953128	0.946694	0.937738	0.930612	0.921573	0.912536	0.90366	0.893481	0.882068	0.870075
0.18802	1.897	1.89392	1.88753	1.87635	1.86222	1.84543	1.82582	1.79935	1.7706	1.73751	1.70381	1.6618	1.62111	1.56977	1.51797	1.4652	1.40007	1.33759	1.26507	1.19473	1.11642	1.09947	1.0857	1.07427	1.06552	1.05416	1.04506	1.03646	1.02867	1.02255	1.0152	1.00833	1.00148	0.994057	0.986749	0.982088	0.974827	0.967703	0.960333	0.953151	0.946368	0.937614	0.929284	0.921357	0.912608	0.903132	0.891648	0.882492	0.869667
0.188947	0.0380444	1.89796	1.89092	1.88077	1.8677	1.85066	1.82927	1.80273	1.77404	1.74256	1.70324	1.66622	1.62023	1.57324	1.52275	1.46468	1.40448	1.33864	1.26615	1.19552	1.1178	1.10097	1.08656	1.07538	1.06407	1.05462	1.04472	1.03807	1.02906	1.02192	1.01467	1.00843	1.00151	0.994166	0.988325	0.98116	0.973493	0.968235	0.960745	0.953251	0.945291	0.937252	0.928815	0.920557	0.911748	0.902544	0.892103	0.881001	0.869305
0.189855	1.90607	1.90337	1.89558	1.88565	1.87107	1.85279	1.83308	1.80738	1.77765	1.74594	1.70919	1.66756	1.62361	1.57528	1.5261	1.46421	1.40577	1.33814	1.26998	1.1955	1.11876	1.101	1.08846	1.07501	1.06456	1.05525	1.04555	1.03753	1.03015	1.02225	1.01462	1.00879	1.00055	0.99502	0.987642	0.981081	0.974773	0.967231	0.959929	0.952995	0.944683	0.936745	0.928888	0.920037	0.911434	0.900956	0.891203	0.880218	0.868224
0.19074	1.91072	1.90708	1.90111	1.89049	1.87541	1.85795	1.83548	1.81025	1.78103	1.75075	1.71274	1.66891	1.62469	1.57791	1.52725	1.4673	1.40485	1.34254	1.26959	1.19707	1.11931	1.10275	1.08655	1.07619	1.06561	1.05548	1.04615	1.03874	1.03004	1.02255	1.01505	1.00765	1.00103	0.995262	0.987312	0.981033	0.973876	0.967354	0.95982	0.952119	0.94406	0.937076	0.928483	0.919004	0.910808	0.900428	0.889973	0.879727	0.868195
0.191669	1.91588	1.91196	1.90509	1.89399	1.88037	1.86207	0.0368065	1.81511	1.78472	1.75322	1.7161	1.67221	1.62854	1.58102	1.52672	0.0293804	1.40928	1.34131	1.27429	1.19765	1.12056	1.10142	1.08773	1.07707	1.06539	1.0558	1.04676	1.03821	1.0304	1.023	1.01503	1.00869	1.00066	0.994358	0.987358	0.981284	0.974476	0.96607	0.958952	0.951826	0.943979	0.936173	0.927365	0.91878	0.91122	0.899857	0.889523	0.878561	0.867703
0.192571	1.91953	1.91666	1.90856	1.89812	1.88461	1.86623	1.84417	1.81863	1.7869	1.75768	1.71909	1.67623	1.63055	1.58198	1.53155	1.47256	1.40669	1.34153	1.27571	0.0239269	1.12164	1.1028	1.08796	1.07678	1.06612	1.05681	1.04648	1.03876	1.03044	1.02196	1.01585	1.00894	1.0018	0.993896	0.987744	0.980651	0.973515	0.96649	0.958857	0.0190226	0.943743	0.936938	0.926675	0.918807	0.908445	0.899984	0.88952	0.877836	0.866294
0.193486	1.92327	1.92045	1.91324	1.90267	1.88908	1.86938	1.8485	1.82334	1.79183	1.75758	1.72	1.68131	1.63485	1.58494	1.52864	1.47305	1.4127	1.34397	1.27634	1.19776	1.12069	1.10343	1.08882	1.07669	1.06662	1.05711	1.04787	1.03872	0.0206007	1.02333	1.01549	1.00782	1.00124	0.99508	0.987563	0.981074	0.972454	0.966413	0.958245	0.951827	0.94391	0.934805	0.927444	0.918196	0.909277	0.897724	0.888963	0.877287	0.865802
0.194396	1.9289	1.92409	1.91856	1.90607	1.89226	1.87532	1.85262	1.82589	1.79369	1.76301	1.72402	1.68229	1.63976	1.58525	1.5331	1.47455	1.41515	1.34679	1.27609	1.19984	1.12226	1.10221	1.0893	1.07721	1.06788	1.05529	1.04894	1.03888	1.03068	1.02357	1.01521	1.00839	1.00183	0.994639	0.987452	0.980385	0.973028	0.965651	0.959037	0.950511	0.943557	0.935099	0.926205	0.918169	0.908642	0.897787	0.887817	0.876763	0.864945
0.195297	1.93225	1.92995	0.0384464	1.9101	0.0379345	1.8784	1.85731	1.83008	1.79818	1.76545	1.72631	1.68667	1.63892	0.0318032	1.53428	1.47536	1.41624	1.34912	1.27522	1.20116	1.12193	1.10248	1.08891	1.07826	1.06755	1.05783	1.04751	1.0391	1.03182	1.02326	1.01669	1.00809	1.00114	0.994045	0.987965	0.979674	0.97355	0.965333	0.957871	0.95124	0.942881	0.935316	0.925332	0.917137	0.906611	0.897662	0.888134	0.877354	0.863085
0.196214	1.93658	1.93303	1.92619	1.9146	1.90106	1.88167	1.86138	1.83274	1.80368	1.76946	1.72938	1.68643	1.64094	1.59161	1.53713	1.47936	1.41533	1.3501	1.27696	1.20192	1.12284	1.1035	1.09049	1.07803	1.0677	1.05816	1.04873	0.0207766	1.03179	1.02376	1.01632	1.00886	1.00081	0.994328	0.987563	0.980126	0.972209	0.965793	0.95732	0.949981	0.942446	0.934825	0.926088	0.91693	0.906495	0.897622	0.88686	0.874329	0.863895
0.197136	1.94239	1.93789	1.93199	1.91833	1.90429	1.88635	1.862	0.0367259	1.8087	1.77203	1.73421	1.68805	1.64383	1.59179	1.54045	1.48112	1.41769	1.35088	1.27851	1.20002	1.12373	1.10412	1.09106	1.07859	1.06934	1.05682	1.049	1.03974	1.03166	1.02385	1.01634	1.00901	1.00109	0.993855	0.987225	0.979015	0.97366	0.964126	0.95805	0.950876	0.941944	0.933432	0.925277	0.917038	0.906691	0.895748	0.885164	0.0174919	0.862476
0.198045	1.94637	1.94289	1.93565	1.92387	1.90735	1.89074	1.86696	1.84172	1.81126	1.77619	1.73482	1.69311	1.64421	1.59632	1.54089	1.48202	1.42056	1.35097	1.27838	1.20549	1.12362	1.10533	1.09165	1.07902	1.0681	1.05719	1.05029	1.03993	1.03287	1.02467	1.01606	1.00861	1.00098	0.993865	0.986143	0.979623	0.972425	0.965281	0.958401	0.949471	0.941386	0.933943	0.924709	0.914786	0.907203	0.895669	0.885303	0.873036	0.862066
0.198934	1.95062	1.94768	1.93885	1.92833	1.91284	1.89366	1.87225	1.84514	1.81264	1.77807	1.74155	1.69544	1.64762	1.5984	1.54181	1.48355	1.42163	1.35399	1.27696	1.20603	1.12404	1.10539	1.09203	1.0797	0.0213702	1.05809	1.04893	1.04114	1.03305	1.02423	1.01616	1.00911	1.0011	0.994327	0.98621	0.979706	0.971628	0.0192933	0.957183	0.950086	0.941591	0.932974	0.924251	0.913988	0.906353	0.895626	0.883804	0.873172	0.861212
0.199846	1.95525	1.95141	1.94287	0.0386362	1.91747	1.89845	1.87629	1.84975	1.81634	1.78076	1.74296	1.69903	1.65338	1.60036	1.54526	1.48346	1.42336	1.3517	1.28135	1.20419	1.12508	1.10552	1.09144	1.0799	1.06894	1.05903	1.04997	1.03983	1.03346	1.02371	1.01681	1.00903	1.0019	0.993896	0.986631	0.978805	0.972405	0.963539	0.957159	0.950143	0.941095	0.932815	0.923656	0.913271	0.904387	0.894988	0.883954	0.872849	0.860365
0.200786	1.95995	1.95559	1.94766	1.93774	1.92261	1.90127	1.87949	1.85539	1.82073	1.78401	1.7444	1.70432	1.65297	1.60347	1.5491	1.48628	1.4246	1.35398	1.27974	1.20641	1.1255	1.10678	1.0923	1.08029	1.06928	1.05973	1.05064	1.0407	1.03271	1.02481	1.01638	1.00906	1.00151	0.993203	0.987294	0.979318	0.971545	0.963175	0.95677	0.949643	0.940952	0.933158	0.922244	0.914095	0.903859	0.894004	0.882911	0.871272	0.858349
0.201684	1.9636	1.95984	1.95167	1.94058	1.92649	1.90619	1.8842	1.85654	1.82348	1.78767	1.74702	1.70446	1.65801	1.60699	1.54874	1.48805	1.4239	1.35613	1.28371	1.20606	1.12518	1.10845	1.09321	1.08101	1.06993	1.0599	1.05084	1.04111	1.03288	0.0204819	1.01536	1.00941	1.00181	0.994007	0.986804	0.978483	0.971728	0.963421	0.956523	0.949372	0.940227	0.931767	0.923287	0.913809	0.903645	0.892193	0.882442	0.870728	0.857884
0.202598	1.96743	1.96482	1.95657	1.94399	1.92978	1.91134	1.88669	1.86071	1.82767	1.78993	1.75186	1.7065	1.66147	1.60959	1.55003	1.49004	1.42399	1.35754	1.28327	1.20855	1.12632	1.10854	1.09464	1.08209	1.07048	0.0212126	1.05055	1.0415	1.03408	1.02341	1.01649	1.00866	1.00117	0.994768	0.986171	0.979538	0.971103	0.964065	0.955751	0.947427	0.940564	0.932343	0.922587	0.913298	0.902571	0.891981	0.882228	0.868161	0.858213
0.203514	1.97295	1.96817	1.95969	1.94932	1.93404	1.91357	1.89167	1.86422	1.82979	1.79303	1.75438	1.71094	1.66304	1.61251	1.55537	1.49025	1.42467	1.35686	1.28807	1.20763	1.12686	1.10893	1.09588	1.08342	1.07002	1.06155	1.05069	1.04207	1.03316	1.02448	1.01652	1.00946	1.00177	0.993603	0.985982	0.979098	0.971342	0.963344	0.956068	0.947493	0.94062	0.931133	0.921489	0.913091	0.902153	0.89125	0.881338	0.869551	0.85487
0.204417	1.97704	1.97311	1.96507	1.95333	1.93658	1.91627	1.89412	1.86688	1.83392	1.7983	1.7586	1.71493	1.66616	1.61195	1.55675	1.49281	1.42852	1.35921	1.28652	1.21043	1.12674	1.10989	1.09625	1.08377	1.07103	1.06191	1.05106	1.04191	1.03275	1.02528	1.01756	1.0085	1.00185	0.993524	0.986021	0.978864	0.0194214	0.963463	0.955808	0.946683	0.939443	0.931432	0.920645	0.912016	0.90293	0.891695	0.879659	0.867669	0.855432
0.205343	1.98141	1.97647	0.0393876	0.0391553	1.94203	1.92112	1.89834	1.87078	1.83842	1.80348	1.76073	1.71691	1.66663	1.61468	1.55926	1.49369	1.43093	1.35987	1.2886	1.20861	1.12918	1.1122	1.09584	1.08453	1.07159	1.06131	1.05097	1.04254	1.03462	1.02529	1.0172	1.00885	1.0018	0.99308	0.985982	0.979054	0.971351	0.962769	0.955433	0.948338	0.938278	0.930172	0.921183	0.911738	0.900802	0.0178028	0.880132	0.868086	0.855938
0.206261	1.98593	1.98149	1.97373	1.96185	1.94597	1.92435	1.90124	1.87366	1.84102	1.80501	1.7649	1.71968	1.66807	1.61747	1.55993	1.49918	1.43358	1.36133	1.28958	1.21007	1.12876	1.11126	1.09717	1.08445	1.07247	1.06249	1.05272	1.04086	1.03484	1.0257	1.01674	1.00956	1.0021	0.993094	0.98622	0.977723	0.971641	0.963296	0.954158	0.947236	0.939273	0.929639	0.92103	0.91078	0.899308	0.0178076	0.879147	0.867703	0.853718
0.207177	1.99033	1.98628	1.97654	1.96625	1.94815	1.9272	1.90484	1.87807	1.84645	1.80858	1.76569	1.72363	1.6711	1.62062	1.56346	1.49841	1.43501	1.36347	1.28867	1.21247	1.12924	1.11248	1.09751	1.08419	1.07334	1.0618	1.05324	1.04292	1.03429	1.02643	1.01737	1.00903	1.00179	0.99273	0.985218	0.978209	0.0194192	0.963482	0.954665	0.947297	0.938774	0.928673	0.919745	0.910627	0.900132	0.889626	0.877721	0.866456	0.854305
0.208072	1.99372	1.98954	1.9808	1.96793	1.95318	1.93155	1.90841	1.88174	1.84958	1.81376	1.76918	1.72421	1.67469	1.62167	1.56504	1.50333	1.43638	1.36302	1.29096	1.21332	1.13074	1.11272	1.09775	1.08556	1.07254	1.06269	1.05307	1.04304	1.03468	1.02661	1.01747	1.00848	1.00233	0.992829	0.98536	0.978075	0.97001	0.0192656	0.954101	0.947685	0.938997	0.927865	0.919412	0.909355	0.89907	0.888734	0.87763	0.867381	0.853042
0.20897	1.99837	1.9945	1.98382	1.97308	1.95563	1.93525	1.91244	1.88495	1.85129	1.81575	1.77389	1.72718	1.67816	1.62413	1.56526	1.50316	1.43907	1.36574	1.29241	1.21291	1.13105	1.11308	1.0991	1.0859	1.07325	1.06339	1.05348	1.04382	1.03357	1.02644	1.01818	1.00948	1.00126	0.993143	0.984143	0.0195626	0.971329	0.962422	0.954902	0.946238	0.937293	0.928999	0.919682	0.90924	0.898043	0.887461	0.877787	0.865695	0.852513
0.209862	2.00279	0.0399525	1.98926	1.97612	0.0392086	1.93749	1.91629	1.88775	1.85561	1.81775	1.77579	1.73172	1.67964	1.6263	1.56665	1.50508	1.43962	1.37059	1.29228	1.21519	1.13204	1.11344	0.0219769	1.08505	1.07459	1.0636	1.05308	1.04345	1.03471	1.0256	1.01734	1.01071	1.00095	0.992982	0.985673	0.977736	0.970268	0.962698	0.954717	0.945965	0.936869	0.928151	0.918551	0.909132	0.898975	0.886791	0.876684	0.863452	0.852551
0.210764	2.00764	2.0033	1.99369	1.97992	1.96336	0.0388606	1.92025	1.89231	1.85885	1.82216	1.77946	1.7329	1.68298	1.62611	1.57024	1.50917	1.44179	1.36891	1.29558	1.21383	1.13217	1.11304	1.09923	1.08531	1.07367	1.0637	1.05399	1.04434	1.03485	1.02517	1.0176	1.01031	1.00177	0.993424	0.985309	0.977958	0.969727	0.962433	0.953604	0.946983	0.936429	0.927323	0.917867	0.907975	0.89917	0.886797	0.875245	0.862874	0.852283
0.211657	2.01267	2.00662	0.0399492	1.98506	1.96852	1.94787	1.92399	1.89595	1.86178	1.82339	1.78297	1.73798	1.6826	1.62874	1.5729	1.51104	1.44212	1.37146	1.29402	1.21504	1.13346	1.11347	1.09895	1.08575	1.07366	1.06493	0.0210653	1.04513	1.03549	1.02568	1.01819	1.00901	1.00167	0.994087	0.985468	0.977296	0.969933	0.962541	0.953917	0.945556	0.936466	0.926376	0.917651	0.908362	0.896822	0.886904	0.875165	0.863817	0.850666
0.21254	2.01515	2.01109	2.0027	1.99039	1.97211	1.95107	1.92767	1.89926	1.86592	1.8268	1.78646	1.73767	1.686	1.6314	1.57565	1.51067	1.44526	1.36942	1.29646	1.21603	1.13344	1.11288	1.09928	1.08647	1.07467	1.06491	1.0551	1.04484	1.03534	1.02647	1.01773	1.00918	1.00215	0.992931	0.98644	0.977323	0.969147	0.961477	0.954343	0.944692	0.935646	0.927603	0.916556	0.906992	0.897772	0.88652	0.874721	0.861944	0.850073
0.213426	2.01924	2.01464	2.0067	1.99414	1.97674	1.95672	1.93117	1.90125	1.86838	1.83083	1.78776	1.7436	1.68872	1.63457	1.57594	1.51377	1.44525	1.37368	1.29751	1.22036	1.13455	1.11381	1.09993	1.08622	1.075	1.06577	1.05501	1.04422	1.03552	1.02723	1.01787	1.00983	1.00116	0.993654	0.985639	0.977071	0.969208	0.961762	0.95332	0.944437	0.935621	0.926195	0.91652	0.906795	0.897015	0.884979	0.874262	0.861953	0.850063
0.214326	2.02336	2.01902	2.01146	1.99837	1.98079	1.95971	1.93318	1.90526	1.8714	1.83223	1.78968	1.74564	1.6915	1.6384	1.57749	1.51651	1.44551	1.37529	0.0259827	1.21957	1.13468	1.11493	1.09985	1.08733	1.07573	1.06511	1.05541	1.04523	1.03444	1.02695	1.01878	1.01019	1.00098	0.993473	0.0197168	0.977284	0.969917	0.961173	0.952803	0.943205	0.935222	0.925618	0.9167	0.018142	0.895521	0.884731	0.873551	0.862416	0.848357
0.215216	2.02809	2.02314	2.01583	2.00198	1.98509	1.96406	1.93777	1.90784	1.87291	1.83627	1.79279	1.74749	1.69481	1.63951	1.58166	1.51615	1.44861	1.37717	1.30001	1.21636	1.13577	1.11521	1.10075	1.08823	1.07453	1.0659	1.05538	1.04462	1.03708	1.0269	1.01726	1.01023	1.00103	0.993515	0.985429	0.977589	0.969205	0.961411	0.952415	0.943869	0.934618	0.924848	0.915828	0.906743	0.894163	0.88493	0.8741	0.861701	0.847218
0.216126	2.03236	2.02787	2.01799	2.00617	1.98984	0.0392817	1.94065	1.91091	1.87875	1.83975	1.79798	1.74868	1.69804	1.64321	1.5824	1.51892	1.44894	1.37756	1.29862	1.21947	1.13621	1.1149	1.10063	1.08864	1.07796	1.06426	1.05474	1.04595	1.03617	1.02741	1.01886	1.00888	1.00152	0.993987	0.98535	0.976534	0.968841	0.9615	0.952324	0.942854	0.934303	0.92524	0.915344	0.905739	0.893953	0.884119	0.872487	0.860538	0.847324
0.217049	2.036	2.03167	2.02191	0.0401926	1.99182	1.96861	1.94466	1.91574	1.88209	1.84075	1.79825	1.75297	1.70021	1.64501	1.5839	1.52233	1.45175	1.37794	1.30025	1.22182	1.13591	1.11712	1.10087	1.08847	1.07739	1.06603	1.05552	1.04619	1.0363	1.02677	1.01897	1.00974	1.00229	0.993112	0.985419	0.976727	0.968718	0.96119	0.95044	0.94251	0.934648	0.924421	0.914689	0.905355	0.894402	0.882581	0.873091	0.859654	0.846309
0.217943	2.03915	2.0367	2.02677	2.01252	1.99566	1.97259	1.94902	0.0384136	1.88308	1.84525	1.80297	1.75483	1.70216	1.6468	1.58814	1.5224	1.45373	1.38113	1.30101	1.22117	1.13759	1.11505	1.10249	1.08855	1.07717	1.06707	1.05553	1.04567	1.03651	1.02782	1.01918	1.01101	1.00227	0.99263	0.98487	0.976681	0.968947	0.959966	0.952155	0.942121	0.933166	0.923666	0.914384	0.904309	0.894497	0.882565	0.871101	0.8588	0.845878
0.218822	2.04463	2.04028	2.0298	2.01735	1.99988	1.97665	1.95211	1.92186	1.88846	1.84686	1.80694	1.75732	1.70467	1.65005	1.58709	0.0304548	1.45617	1.38151	1.30221	1.22025	1.1376	1.11755	1.10152	1.08913	0.0215682	1.06624	1.05706	1.04613	1.03641	1.02796	1.0193	1.01028	1.00154	0.0198677	0.984577	0.97746	0.96866	0.960451	0.95007	0.941529	0.933676	0.923351	0.914168	0.904075	0.893813	0.881956	0.869991	0.858499	0.845624
0.21974	2.04894	2.04434	2.03519	2.01983	2.00307	1.98309	1.95458	1.92496	1.89095	1.85251	1.80896	1.75823	1.70867	1.65123	1.59016	1.52491	1.45928	1.38217	1.30371	1.22233	1.13764	1.11813	1.10235	1.08938	1.07887	1.0666	1.05618	1.0463	1.03776	1.02841	1.01916	1.01	1.00129	0.993734	0.0197006	0.0195522	0.968164	0.958965	0.95133	0.941308	0.932056	0.924339	0.91398	0.902609	0.892983	0.882667	0.869294	0.858178	0.844162
0.220648	2.05195	2.04833	2.03836	2.02459	2.00542	1.98442	1.95943	1.92801	1.89451	1.85566	1.81026	1.76474	1.70881	1.65493	1.58929	1.52733	1.45724	1.38428	1.30726	1.22038	1.13774	1.11713	1.10372	1.08942	1.07904	1.06732	1.05742	1.04641	1.03799	1.02861	1.0186	0.0202014	1.00146	0.993603	0.984799	0.977023	0.967845	0.960081	0.949839	0.941914	0.932669	0.922838	0.914814	0.903058	0.891162	0.880738	0.868766	0.857406	0.844291
0.221573	2.05683	2.05223	2.0431	2.02875	2.00987	1.98956	1.96337	1.93301	1.89736	1.85612	1.81527	1.76469	1.71501	1.65404	1.592	1.52741	1.46111	1.38607	1.30538	1.22334	1.13762	1.11953	1.10346	0.0109094	1.07993	1.06808	1.05773	1.0471	1.03772	1.02827	1.01955	1.00927	1.00218	0.99274	0.985132	0.97662	0.967233	0.958608	0.950601	0.942574	0.018638	0.922324	0.913181	0.901814	0.89236	0.880104	0.867806	0.856322	0.843616
0.222501	2.06105	2.05426	2.04612	2.03357	2.01518	1.9925	1.96619	1.93507	0.0380385	1.85958	1.81816	1.76786	1.71308	1.65976	1.59563	1.53061	1.46014	1.38541	1.30692	1.22453	1.13775	1.12046	1.10551	1.09102	1.081	1.0679	1.05786	1.04818	1.0375	1.02774	1.01939	1.01083	1.00128	0.992962	0.985278	0.976193	0.966856	0.959153	0.950833	0.940955	0.932164	0.922405	0.911665	0.902297	0.890865	0.879331	0.868325	0.855146	0.843422
0.223415	2.06336	2.0597	2.04996	2.03712	2.01903	1.99484	1.97039	1.93825	1.9044	1.86423	1.81856	1.77159	0.0343198	1.65815	1.59757	1.53424	1.46151	0.0277451	1.30527	1.2251	1.13876	1.11963	1.10641	1.09358	1.08038	1.06884	1.05789	1.04769	1.03768	1.0288	1.02007	1.01048	1.00119	0.993495	0.984447	0.975526	0.967492	0.958679	0.950568	0.940477	0.931323	0.922954	0.911746	0.90091	0.890525	0.878637	0.86778	0.854704	0.842366
0.224313	2.06731	2.06235	2.05354	2.0393	2.02082	2.00079	1.97388	1.94231	1.90765	1.86506	1.82185	1.77536	1.71901	1.66076	1.59981	1.53461	1.46315	1.3914	1.30545	1.22474	1.13909	1.12071	1.10683	1.0937	1.08164	1.06848	1.05839	1.04752	1.03787	1.02979	1.01927	1.0098	1.0015	0.993224	0.984978	0.9755	0.966672	0.958697	0.950061	0.941125	0.930375	0.921711	0.912087	0.900384	0.889846	0.878563	0.865081	0.85542	0.842189
0.225255	2.0705	2.06589	2.0563	2.04332	2.02512	2.00518	1.97891	1.94494	1.91199	0.0373917	1.82455	1.77547	1.72444	1.66337	1.59987	1.53686	1.46435	1.39092	1.30768	1.22588	1.13956	1.12279	1.10725	1.09326	1.08194	1.06935	1.0592	1.04776	1.0386	1.02838	1.01902	1.01013	1.00239	0.993192	0.984088	0.976203	0.966174	0.958371	0.949692	0.938892	0.930033	0.922737	0.910706	0.900982	0.888875	0.877826	0.866511	0.853695	0.839973
0.226164	2.0753	2.07035	0.0412055	2.04759	2.03049	2.00917	1.98197	1.95013	1.91443	1.87309	1.82589	1.77961	1.72504	1.66626	1.60543	1.53639	1.46399	1.3906	1.30972	1.22677	1.14044	1.12392	1.10741	1.09346	1.08231	1.06986	1.05902	1.04965	1.03747	1.02919	1.01914	1.01067	1.00107	0.993565	0.984538	0.975906	0.967066	0.958005	0.94784	0.939993	0.930277	0.920147	0.910913	0.900349	0.889493	0.876918	0.865121	0.853344	0.840395
0.227096	2.07924	2.07454	2.0657	2.05116	2.03365	2.01383	1.98514	1.95422	1.91773	1.87491	1.82951	1.77993	1.72645	1.66973	1.60593	1.54026	1.46827	1.3911	1.31284	1.22631	1.14106	1.12374	1.10746	1.09539	1.08207	1.07034	1.05869	1.04844	1.03914	1.0292	1.01956	1.01007	1.0016	0.993626	0.984369	0.975932	0.96686	0.957991	0.948215	0.939128	0.930112	0.919598	0.910222	0.899225	0.889143	0.0175334	0.865309	0.851466	0.84076
0.228021	2.0826	2.07855	2.06943	2.05559	2.03698	2.01422	0.0397955	1.95738	1.91966	1.87865	1.83275	1.78284	1.72799	1.67027	1.60725	1.54234	1.47245	1.39065	1.31291	1.22887	1.14223	1.12277	1.10909	1.09648	1.08297	1.07023	1.05878	1.04924	1.0382	1.02847	1.02008	1.01038	1.00223	0.993234	0.98428	0.976193	0.965485	0.957188	0.948532	0.939146	0.929645	0.920325	0.909182	0.898938	0.888577	0.877378	0.863347	0.851336	0.839892
0.228943	2.08701	0.0416443	2.07297	2.05955	2.04086	2.02	1.99184	1.95978	1.92348	1.88109	1.83533	0.0356784	1.73151	1.67533	1.60928	1.54335	1.47166	1.39396	1.31496	1.22538	1.14307	1.12533	1.10917	1.09678	1.08266	1.0709	1.05925	1.04872	1.03816	1.02873	1.01998	1.01051	1.00174	0.993101	0.984359	0.975554	0.966683	0.957217	0.94802	0.938319	0.929362	0.919894	0.908402	0.898355	0.887817	0.876444	0.862971	0.852542	0.838391
0.229875	2.09093	2.08684	2.07623	2.06281	2.04458	2.02174	1.99595	1.96314	1.92782	1.88462	1.83827	1.78603	1.73393	1.67612	1.6128	1.54601	1.47063	1.39698	1.31345	1.22807	1.14317	1.12337	1.1098	1.09548	1.0839	1.0703	1.06034	1.04828	1.03963	1.02912	1.01969	1.01059	1.00173	0.991847	0.98453	0.976269	0.965955	0.957188	0.947928	0.938222	0.0185795	0.919175	0.908599	0.897561	0.887225	0.875601	0.862777	0.851261	0.838845
0.230805	2.09358	2.09031	2.08052	2.06535	2.04802	2.02565	1.99835	1.96638	1.93043	1.88811	1.83984	1.79001	1.73617	1.67889	1.61458	1.54573	1.47362	1.39805	1.31618	0.0246457	1.14448	1.12409	1.10928	1.09609	1.08354	1.07154	1.0608	1.04898	1.0387	1.0296	1.01944	1.00986	1.00184	0.993304	0.984357	0.975322	0.966109	0.956329	0.948504	0.938111	0.929399	0.918366	0.906941	0.898191	0.886359	0.875183	0.863023	0.849694	0.837977
0.231729	2.09698	0.0418568	2.08371	2.06901	2.05294	2.02948	2.00134	1.96903	1.93375	1.89053	1.8429	1.79347	1.7387	1.68147	1.61519	1.54643	1.47516	1.40092	1.31959	1.23215	1.14489	1.12513	1.10976	1.09688	1.08359	1.0718	1.06045	1.04863	1.03897	1.02987	1.0202	1.01136	1.00131	0.992519	0.983936	0.975015	0.965118	0.957207	0.947211	0.938579	0.928608	0.917655	0.9073	0.897179	0.886058	0.874267	0.862509	0.850233	0.837304
0.232624	2.10123	2.09619	2.08663	2.07423	2.05544	2.03193	2.00666	1.97185	0.0387123	1.89266	1.84786	1.79617	1.73951	1.68487	1.61801	1.54522	1.47873	1.40105	1.31683	1.23508	1.14539	1.12646	1.10947	1.09624	1.08348	1.07196	1.06091	1.04973	1.0384	1.03004	1.02051	1.01197	1.00159	0.992249	0.983221	0.975247	0.965452	0.956277	0.947543	0.937596	0.926921	0.919075	0.907453	0.896659	0.884753	0.874335	0.862037	0.848438	0.836704
0.233524	2.10436	2.09912	2.0907	2.07683	2.05906	2.03756	2.00962	1.97621	1.93855	1.89721	1.84915	1.79956	1.74491	1.68481	1.61733	1.54849	1.47743	1.40115	1.32034	1.23623	1.14686	1.12629	1.11006	1.09696	1.08386	1.07112	1.06132	1.04923	1.0398	1.0302	1.02051	1.01107	1.00162	0.99273	0.983864	0.973669	0.965659	0.956543	0.946729	0.937219	0.927541	0.917323	0.908	0.896522	0.883668	0.874216	0.861582	0.846991	0.835343
0.234451	2.10772	2.10357	2.09505	2.08382	2.06315	2.04266	2.0108	1.97923	1.94182	1.9015	1.85316	1.80192	1.74701	1.68595	1.61862	1.54927	1.47851	1.40355	1.32092	1.23612	1.1478	1.12518	1.11183	1.09677	1.08384	1.07194	1.06039	1.05119	1.04001	1.0309	1.02	1.01029	1.00194	0.992801	0.984129	0.973094	0.965573	0.956244	0.947082	0.937451	0.927371	0.917027	0.0181181	0.895362	0.884279	0.872623	0.861607	0.847883	0.834208
0.235329	2.11066	2.10756	2.09886	2.08568	2.06602	2.0452	2.01811	1.98165	1.94626	1.9023	1.85701	1.80279	1.74659	1.68713	1.62261	1.55192	1.47993	1.40614	1.32334	1.23586	1.14778	1.12669	1.11118	1.09701	1.08504	1.07166	1.061	1.05081	1.04104	1.03001	1.02078	1.01173	1.00087	0.993103	0.983299	0.973582	0.965245	0.956248	0.946172	0.937144	0.927083	0.916425	0.906199	0.894767	0.883471	0.873385	0.859502	0.84782	0.8342
0.236224	2.11516	2.11093	2.10309	2.08845	2.07063	2.04728	2.02046	1.98613	1.94841	1.90586	1.85707	1.80768	1.7492	1.6899	1.62587	1.55401	1.47943	1.40436	1.32528	1.23738	1.14781	1.12702	1.11167	1.09742	1.08502	1.07206	1.06184	0.0210268	1.03918	1.03082	1.02072	1.01219	1.00163	0.991845	0.983458	0.974346	0.0192915	0.95584	0.94683	0.935845	0.926504	0.916218	0.90601	0.894267	0.882958	0.871946	0.859974	0.847109	0.832693
0.23714	2.12021	2.1158	2.10741	2.09124	2.07449	2.05025	2.02372	1.99057	1.94963	1.90822	1.85928	1.81021	0.0350749	1.69226	1.6264	1.55735	1.48287	1.40736	1.32328	1.23886	1.14737	1.12607	1.11086	1.09813	1.08459	1.07355	1.06207	1.05065	1.04034	1.03122	1.02084	1.01115	1.00104	0.992621	0.982756	0.974207	0.965911	0.956002	0.946887	0.936066	0.92582	0.915697	0.904388	0.894679	0.88174	0.870886	0.859999	0.846468	0.833252
0.238044	2.12455	2.11913	2.10912	2.09558	2.07665	2.0522	2.02822	1.99205	1.95528	1.91085	1.86263	1.81261	1.7547	1.69401	1.62961	1.56163	1.48602	1.40898	1.32363	1.23871	1.14852	1.12519	1.11122	1.09854	1.08678	1.0732	1.06132	1.05135	1.04069	1.03066	1.02093	1.01086	1.00195	0.993105	0.982683	0.973917	0.965534	0.955736	0.945774	0.936146	0.925529	0.915014	0.903878	0.894345	0.882551	0.87104	0.858986	0.844762	0.832134
0.238941	2.12774	0.0424447	2.11503	2.09999	2.07997	2.056	2.03037	1.99574	0.0391141	1.91465	1.86703	1.81443	1.75875	1.69699	1.63081	1.56244	1.48853	1.41207	1.3261	1.23692	1.14813	1.12844	1.11236	1.09878	1.08727	1.07227	1.0635	1.05037	1.04156	1.02923	1.02103	1.01158	1.00188	0.992288	0.982867	0.973994	0.964997	0.956386	0.944686	0.935687	0.925161	0.913945	0.905222	0.893187	0.881258	0.871878	0.857621	0.844997	0.831802
0.239852	2.13097	2.12715	2.11776	2.10297	2.08405	2.06057	2.03151	1.99807	1.95937	1.91854	1.86888	1.81538	1.76113	1.69822	1.63537	1.56249	1.49078	1.40968	1.32909	1.24	1.14872	1.12738	1.11248	1.09913	1.08616	1.07225	1.0628	1.05221	1.04097	1.03176	1.02034	1.01127	1.00097	0.992139	0.983052	0.974014	0.965521	0.955072	0.94517	0.935985	0.924586	0.913658	0.904158	0.892824	0.880947	0.870857	0.858634	0.8436	0.829356
0.240763	2.13549	2.13048	2.12148	2.10476	2.08853	2.0629	2.03465	1.99968	1.96249	1.91936	1.87336	1.8185	1.76257	1.70139	1.63603	1.56394	1.49123	1.41236	1.32576	1.24019	1.14965	1.1274	1.11162	1.09833	1.08687	1.07369	1.06255	1.05341	1.04154	1.03117	1.02073	1.01086	1.00076	0.991667	0.9837	0.974234	0.964232	0.954892	0.945686	0.935637	0.923921	0.913712	0.903111	0.892172	0.881132	0.869626	0.856957	0.843322	0.830206
0.241706	2.13933	2.13449	2.12433	2.10995	2.09075	2.06591	2.03705	2.00337	0.0393064	1.92201	1.87556	1.82178	1.76646	1.70139	1.63765	1.56391	1.49236	1.41476	1.33038	1.23688	1.14913	1.12774	1.11181	1.09965	1.08731	1.07504	1.0636	1.05242	1.04135	1.03135	1.02113	1.01161	1.00108	0.991807	0.982568	0.974317	0.964503	0.954721	0.944446	0.934884	0.924082	0.913855	0.903092	0.891463	0.880304	0.869145	0.855467	0.84389	0.829405
0.242631	2.14292	2.13845	2.12913	2.11304	2.09459	2.06941	2.04041	2.00647	1.96818	1.92622	1.87826	1.82338	1.76525	1.70568	1.63848	1.56901	1.49186	1.41194	1.33032	1.23919	0.0229883	1.12843	1.11295	0.0219947	0.0217414	1.07469	1.06428	1.05184	1.04219	1.03243	1.01993	1.01113	1.00226	0.991646	0.982989	0.973342	0.963866	0.954963	0.944002	0.933662	0.925062	0.91293	0.902133	0.891001	0.879896	0.868469	0.855705	0.842948	0.828993
0.243552	2.14784	2.1421	2.1324	2.11715	2.09761	2.07272	2.04228	2.01144	1.97119	1.92665	1.87824	1.82502	1.77071	1.70618	1.64063	1.56847	1.49715	1.41464	1.32837	1.2408	1.14958	1.13054	1.11342	1.10051	1.08692	1.07542	1.06371	1.05273	1.0418	1.03206	1.02117	1.0106	1.00142	0.992923	0.982705	0.974063	0.963265	0.953943	0.943896	0.933572	0.923809	0.913164	0.902377	0.890787	0.879442	0.867929	0.854717	0.842192	0.828257
0.24446	2.15235	2.14669	2.13644	2.119	2.10215	2.07528	2.04648	2.01325	1.97475	1.931	1.88	1.82614	1.77307	1.70943	1.64266	1.57007	1.49346	1.41842	1.32748	1.24148	1.15054	1.13125	1.11571	1.10018	1.08819	1.07655	1.06395	1.0528	1.04144	1.0308	1.0216	1.01175	1.001	0.992077	0.982869	0.974559	0.963418	0.953241	0.943663	0.934015	0.923072	0.912724	0.0180522	0.0178108	0.878687	0.866512	0.85437	0.84164	0.827327
0.245345	2.15564	2.14998	2.13974	2.12434	2.10367	2.08073	2.05049	2.01659	1.97662	1.9352	1.88443	1.83066	1.77421	1.71003	1.64129	1.57381	1.49697	1.41672	1.33087	1.24255	1.15052	1.13083	1.11592	1.10185	1.08834	1.07506	1.06488	1.05313	1.04203	1.03157	1.02092	1.01237	1.00138	0.992011	0.982996	0.974324	0.962877	0.953526	0.94389	0.93293	0.922766	0.912033	0.901643	0.891032	0.878252	0.865862	0.852579	0.841949	0.827164
0.246267	2.16026	2.15281	2.14438	2.12827	0.0421611	2.08161	2.05381	2.0198	1.98104	1.93326	1.88708	0.0366721	1.77696	1.71222	1.64528	1.57157	1.498	1.41768	1.3321	1.24351	1.15211	1.13163	1.11585	1.10272	1.08905	1.07682	1.06506	1.05287	1.04186	1.03244	1.02091	1.01077	1.0024	0.992722	0.983291	0.972677	0.963774	0.953189	0.943334	0.93302	0.922054	0.91258	0.900928	0.890263	0.877343	0.865487	0.852676	0.840991	0.826947
0.247187	2.16191	0.0431418	2.14682	2.13088	2.11073	2.086	2.05663	2.02353	1.98463	1.93717	1.88694	1.835	1.77779	1.71605	1.6468	1.57507	1.49912	1.41867	1.33343	1.24274	1.15273	1.1331	1.1156	0.0220458	1.09043	1.07805	1.06356	1.05355	1.0421	1.0319	1.02152	1.0109	1.00285	0.9921	0.982345	0.973506	0.962975	0.953995	0.943402	0.932984	0.921531	0.911368	0.900139	0.89039	0.877258	0.864564	0.852243	0.840008	0.826898
0.248104	2.16721	2.15949	2.14919	2.13249	2.1154	2.08965	2.0627	2.02582	1.98586	1.94093	1.89	1.83667	1.78195	1.71464	1.64833	1.57852	1.49818	1.41904	1.33331	1.24471	1.1537	1.13442	1.11749	1.10287	1.09028	0.0215301	1.06546	1.05413	1.04148	1.03188	1.02184	1.01161	1.00235	0.991595	0.982475	0.972916	0.962791	0.952597	0.943794	0.933108	0.922746	0.910605	0.900328	0.888525	0.877539	0.86316	0.853065	0.840674	0.824536
0.248995	2.17019	2.16438	2.15145	2.13836	2.1195	2.0943	2.06211	2.03066	1.98826	1.94423	1.89247	1.84138	1.78262	1.71774	1.65161	1.57718	0.0300152	1.41977	1.33567	1.24646	0.0230844	1.13512	1.11844	1.10346	1.08955	1.07792	1.06554	1.05355	1.04265	1.03154	1.02175	1.01266	1.00171	0.991807	0.981372	0.973875	0.96288	0.952672	0.943411	0.93088	0.922701	0.91065	0.899137	0.888828	0.876064	0.864404	0.852699	0.83879	0.826268
0.249914	2.17449	2.16742	2.15807	2.14183	2.12191	2.09694	2.06585	2.03519	1.99137	0.0389197	1.89635	1.84317	1.78306	0.034411	1.65746	1.57626	1.50061	1.42143	1.33667	1.24932	1.1553	1.13481	1.11857	1.10447	1.08977	1.07848	1.06593	1.05463	1.04275	1.03227	1.02186	1.0114	1.00185	0.992601	0.981656	0.97269	0.96338	0.953308	0.942054	0.931591	0.921773	0.910444	0.899926	0.887241	0.876106	0.863677	0.851007	0.838222	0.825111
0.250861	2.17674	0.0433952	0.0431966	2.14668	2.12605	2.09812	2.0709	2.03508	1.9965	1.95033	1.90011	1.84161	1.78631	1.72389	1.65455	1.58186	1.50376	1.41951	1.33955	1.24757	1.1561	1.13621	1.11923	1.1039	1.09181	1.07812	1.06542	1.05547	1.0428	1.03246	1.02162	1.0121	1.0017	0.992389	0.981408	0.972813	0.962234	0.95318	0.942324	0.930781	0.921701	0.910247	0.899175	0.887423	0.875232	0.86231	0.851662	0.838263	0.823781
0.251788	2.17949	2.17407	2.16625	2.15167	2.12831	2.10385	2.07355	2.03851	1.99784	1.95376	1.90271	1.84479	1.7897	1.72407	0.0331214	1.58308	1.50648	1.42199	1.33768	1.24959	1.15613	1.13705	1.11958	1.10534	1.09228	1.07856	1.0662	1.05568	1.04267	1.03318	1.02192	1.01106	1.0015	0.992056	0.981428	0.973313	0.962252	0.952743	0.940986	0.93291	0.920639	0.909915	0.898423	0.887154	0.873769	0.862883	0.850264	0.836891	0.824875
0.252682	2.18453	2.17991	2.16915	2.15324	2.13267	2.10674	2.07748	2.04216	1.99915	1.95885	1.90433	1.84614	1.78973	1.72962	1.65817	1.58374	1.5068	1.42129	1.34027	1.25062	1.15668	1.137	1.12004	1.10631	1.09241	1.07863	1.06659	1.05633	1.04314	1.03236	1.02217	1.01212	1.00146	0.991797	0.981665	0.972022	0.961396	0.953071	0.942017	0.932218	0.921035	0.909143	0.897521	0.886272	0.874763	0.862352	0.850542	0.836323	0.823026
0.253584	2.18767	2.18321	2.17356	2.15659	2.13572	2.11108	2.07939	2.04356	2.00195	1.96035	1.90575	1.8507	1.79344	1.72998	1.65649	1.58656	1.51038	1.42742	0.0267397	1.25069	1.1576	1.13729	1.11961	1.10748	1.09319	1.07911	1.06759	1.05387	1.04474	1.03273	1.02278	1.0121	1.0011	0.991685	0.982238	0.972222	0.961125	0.951843	0.940659	0.932382	0.919382	0.909664	0.898059	0.885602	0.874328	0.862455	0.849589	0.835788	0.822883
0.254535	2.19077	2.18712	2.17689	0.0431859	2.13858	2.11462	2.08216	2.04414	2.00765	1.9613	1.9086	1.85235	1.7975	1.73211	1.66288	1.58453	1.51145	1.42818	1.34285	1.25038	1.15796	1.13681	1.12169	1.10666	1.09385	1.08119	1.0668	1.05466	1.04383	1.03339	1.02182	1.01261	1.00108	0.990994	0.981607	0.972887	0.961905	0.951059	0.940849	0.930708	0.920361	0.908128	0.896977	0.885645	0.874528	0.862013	0.84786	0.835674	0.822857
0.25544	2.19418	2.19053	2.18067	2.16333	0.042861	2.1179	2.08726	2.05044	2.00731	1.96252	1.91216	1.86005	1.79911	1.73302	0.0332345	1.5917	1.51017	1.42827	1.34185	1.25499	1.15803	1.13741	1.12292	1.10708	1.09373	1.08014	1.06713	1.05557	1.04381	1.03285	1.02221	1.01226	1.00139	0.990762	0.982702	0.972171	0.961715	0.951065	0.940948	0.92938	0.918983	0.908722	0.897468	0.886125	0.87261	0.861194	0.848455	0.835155	0.820449
0.256357	2.19948	2.19421	2.18294	2.16756	2.14503	2.12032	2.08791	2.05485	2.01206	1.96453	1.91696	0.0371668	1.80149	1.73433	1.66671	1.59267	1.51335	1.43032	1.34231	1.25427	1.1589	1.13895	1.12211	0.0221245	1.0934	1.08028	1.06832	1.055	1.04371	1.03406	1.02285	1.01166	1.0004	0.992141	0.981538	0.972707	0.961581	0.951135	0.939874	0.929037	0.919127	0.908301	0.896126	0.885131	0.874694	0.860473	0.0169494	0.834603	0.81988
0.257286	2.20298	2.19893	2.18705	2.17017	2.15051	2.12376	2.0918	2.05505	2.01484	1.96697	1.91751	1.86205	1.8032	1.73669	1.66892	1.59598	1.51553	1.42981	1.34239	1.25702	1.15987	1.13784	1.12232	1.10673	1.09353	1.0807	1.06875	1.05564	1.04415	1.03255	1.02289	1.01182	1.00118	0.991927	0.981147	0.972558	0.961348	0.950496	0.939415	0.929219	0.918777	0.908095	0.895553	0.885197	0.873842	0.858691	0.847236	0.834985	0.818913
0.258179	2.20795	2.20177	2.1898	2.17315	2.15251	2.12618	2.09631	2.06018	2.01719	1.97267	0.0383701	0.0372683	1.80496	1.74043	1.67068	1.5952	1.51686	1.43197	1.34456	1.25731	1.15976	1.13753	1.12272	1.10745	1.09396	1.0801	1.06787	1.05587	1.0451	1.03306	1.02218	1.01244	1.00147	0.991344	0.981281	0.97157	0.96132	0.951349	0.939486	0.928247	0.918388	0.908103	0.894844	0.885044	0.871323	0.859881	0.847607	0.834839	0.818269
0.259115	2.21119	2.20646	2.19339	2.17836	2.15647	2.12998	2.09983	2.06249	2.02038	1.97453	1.92094	1.86629	1.80656	1.74116	1.67204	1.59737	1.51767	1.43504	1.3453	1.25613	0.0232042	1.13847	1.12221	1.10797	1.09356	1.08072	1.06849	1.05625	1.04416	1.03292	1.02266	1.01303	1.00222	0.990733	0.982328	0.970699	0.960821	0.950372	0.939135	0.929272	0.918848	0.907108	0.895516	0.882065	0.872653	0.859937	0.846013	0.833111	0.818224
0.260017	2.21409	2.20873	2.19887	2.18238	2.15771	2.13513	2.10195	2.06654	2.02434	1.97377	1.92388	1.86798	1.80718	1.74296	1.67312	1.59808	1.51817	1.43457	1.34947	0.0251534	1.16102	1.13866	1.12216	1.10802	1.09448	1.08096	1.06881	1.05575	1.04525	1.03269	1.023	1.01242	1.00158	0.991507	0.981631	0.969567	0.961563	0.950411	0.939237	0.929577	0.917939	0.906299	0.895223	0.884102	0.870867	0.858915	0.844849	0.832503	0.818525
0.260935	2.2181	2.21327	2.20218	2.18412	2.16312	2.13833	2.10687	2.0692	2.02559	1.97954	1.9245	1.86946	1.80969	1.74565	1.67351	1.59979	1.52014	1.43592	1.35239	1.25609	1.15993	1.1389	1.12227	1.10741	1.09462	1.08143	1.06968	1.05587	1.04505	1.03357	1.02293	1.01119	1.0024	0.991406	0.980917	0.971377	0.960822	0.949509	0.939294	0.928576	0.917706	0.906866	0.894233	0.883689	0.870317	0.858681	0.844613	0.831733	0.817176
0.261819	2.22144	2.21592	2.20499	2.18767	2.16661	2.1425	2.10915	2.07245	2.02894	1.98304	1.92955	1.87154	1.81	1.74731	1.67432	1.60369	1.51969	1.43915	1.35204	1.25825	1.16065	1.13961	1.12216	1.10811	1.09497	1.08125	1.06826	1.05742	1.04495	1.03387	1.02352	1.0119	1.0014	0.991797	0.981172	0.970102	0.960336	0.949847	0.938601	0.928594	0.918739	0.905663	0.894454	0.88212	0.870701	0.857275	0.844516	0.83205	0.818024
0.262746	2.22473	2.21933	2.20602	2.19271	2.17208	2.14484	2.11379	2.07413	2.03401	1.98397	1.93166	1.87487	1.81406	1.74787	1.67835	1.60214	1.52376	1.43597	1.35389	1.25593	1.16143	1.13876	1.12333	1.10902	1.09442	1.08153	1.0677	1.05747	1.04583	1.03478	1.02324	1.01122	1.00186	0.991809	0.980164	0.970577	0.959751	0.948819	0.939427	0.928873	0.917202	0.905342	0.894115	0.880923	0.87085	0.857063	0.845126	0.830274	0.816673
0.263656	2.22893	2.22221	2.2123	0.0439333	2.17445	2.14911	2.11699	2.07681	2.0338	0.0397953	1.93457	1.87619	1.81719	1.74928	1.67785	1.60142	1.52235	1.44018	1.35044	1.25999	1.16194	1.13978	1.12415	1.1082	1.09421	1.08189	1.06858	1.05795	1.0457	0.0206913	1.02253	1.01195	1.00192	0.991326	0.980269	0.970296	0.959266	0.948795	0.939511	0.927414	0.918101	0.904058	0.893178	0.881431	0.869253	0.8574	0.843906	0.83128	0.815804
0.264585	0.0446158	2.22673	2.21653	2.19995	2.17753	2.15343	2.11894	2.08125	2.03529	1.98895	1.93719	1.88153	1.81824	1.75491	1.6769	1.60405	0.0305413	1.44019	1.35104	1.25868	1.16154	1.14028	1.12332	1.10834	1.09552	1.08193	1.07005	1.05768	1.04599	1.03425	1.02351	1.0117	1.00143	0.991477	0.979885	0.969058	0.959433	0.948904	0.939005	0.927629	0.916329	0.905467	0.892139	0.880957	0.86912	0.856443	0.843019	0.830339	0.817089
0.265476	2.23581	2.2309	2.22005	2.20348	2.1831	2.1569	2.12172	2.08372	2.039	1.99021	1.93903	1.88438	1.81993	1.75291	1.68254	1.60341	1.52833	1.44114	1.35338	1.26071	1.16151	1.14042	1.12414	1.10812	1.09604	1.082	1.06998	1.05748	1.0467	1.03366	1.02345	1.0122	1.00167	0.990714	0.980689	0.968599	0.959784	0.948149	0.938707	0.927313	0.916797	0.90336	0.891757	0.881217	0.868886	0.856485	0.843011	0.831621	0.814749
0.266357	2.23924	2.2336	2.22441	2.20667	2.18618	2.15889	2.12379	0.0416883	0.0408536	1.99589	1.94069	1.88419	1.82326	1.75319	1.68353	1.61002	1.5257	1.4438	1.3569	1.25861	1.16226	1.14137	1.12467	1.10906	1.09529	0.0216354	1.07019	1.05862	1.04607	1.03426	1.02262	1.01239	1.00211	0.991223	0.97975	0.968996	0.959479	0.94826	0.938865	0.926485	0.91499	0.904033	0.891988	0.880897	0.868976	0.856357	0.0168378	0.828971	0.815903
0.267246	2.24369	2.23852	2.22653	2.21245	2.18782	2.16157	2.12776	2.08677	2.04528	1.99535	1.94227	1.88659	0.036484	1.75871	1.68419	1.60949	1.52926	1.44416	1.35626	1.25948	1.16374	1.14208	1.1259	1.1091	1.09444	1.08299	1.07011	1.05812	1.04597	1.03533	1.02274	1.01253	1.00152	0.990765	0.980528	0.970151	0.958572	0.948165	0.938182	0.925457	0.914945	0.0180875	0.891741	0.88055	0.868891	0.853883	0.842433	0.829295	0.813002
0.268134	2.24721	2.24004	2.23122	2.21526	2.19101	2.16329	2.12821	0.041836	2.04895	0.039967	1.94586	0.0377642	1.8276	1.75931	1.68444	1.60921	1.53198	1.44579	1.35728	1.26161	1.16347	1.14392	1.12638	1.10959	1.09548	1.08335	1.06948	1.05837	1.04607	1.03607	1.02214	1.01342	1.00003	0.991888	0.980391	0.96947	0.958971	0.947748	0.936782	0.925942	0.915359	0.903557	0.892179	0.879396	0.8662	0.855037	0.843051	0.826483	0.813569
0.269037	2.25019	2.24467	2.23358	2.2167	2.19295	2.16658	2.13215	2.09353	2.05084	2.00083	1.94812	1.8915	1.83058	1.75817	1.68806	0.032177	1.53321	1.44684	1.36026	1.26259	1.16355	1.14468	1.12583	1.11232	1.09664	1.08299	1.06946	1.05855	1.04672	1.03491	1.02265	1.01333	1.0017	0.990101	0.979621	0.96976	0.95938	0.94844	0.935546	0.926718	0.913821	0.903487	0.891251	0.879644	0.866673	0.854476	0.84075	0.826596	0.813519
0.269955	2.25434	2.24782	2.2364	2.21955	2.19831	2.16973	2.13586	2.09764	2.05081	2.00336	0.0390227	1.89334	1.82853	1.76447	1.69051	1.61239	1.53218	1.45039	1.3584	1.26325	1.165	1.14527	1.12707	1.11162	1.09811	1.08269	1.07067	1.05807	1.04688	1.03508	1.02328	1.01275	1.00184	0.990202	0.980239	0.969596	0.959242	0.94761	0.936292	0.925563	0.914369	0.902123	0.891429	0.87867	0.866404	0.853694	0.841189	0.825756	0.811571
0.27086	2.25745	2.25174	2.23825	2.22267	2.20117	2.17334	2.13866	0.042028	2.0568	2.00698	1.9527	1.89254	1.83293	1.76433	1.69184	1.61769	1.53282	1.4471	1.35902	1.26581	1.16558	1.14489	1.1282	1.11402	1.09749	1.08261	1.07105	1.05911	1.04712	1.03518	1.02354	1.01204	1.00211	0.990353	0.980736	0.968722	0.959657	0.946389	0.936755	0.926122	0.913749	0.902277	0.890195	0.878556	0.866188	0.853423	0.838565	0.826087	0.812054
0.271782	2.2604	2.25412	2.24238	2.22626	2.20346	2.17719	2.14376	2.1022	2.05849	2.00899	1.9559	1.89718	1.83291	1.7675	1.69314	1.61761	1.53171	1.45122	1.35433	1.267	1.16723	1.14597	1.12893	1.11334	1.09888	1.08326	1.07101	1.05915	1.04809	1.03562	1.02403	1.01241	1.00139	0.990856	0.979036	0.969686	0.957232	0.947516	0.936447	0.926337	0.913542	0.902313	0.890421	0.877617	0.865046	0.85236	0.839466	0.824832	0.811063
0.272693	2.2616	2.25676	2.2466	2.23142	2.20854	2.18004	2.14511	2.10664	2.05976	2.01111	1.95778	1.89858	1.83588	1.77071	1.69704	1.61805	1.53322	1.44816	1.3607	1.26255	1.16752	1.147	1.12938	1.1148	1.09864	1.08541	1.07127	1.05898	1.04609	1.03685	1.02454	1.01193	1.00222	0.990062	0.980144	0.968431	0.95795	0.94723	0.935826	0.925049	0.914432	0.901445	0.89023	0.877578	0.864329	0.851865	0.838792	0.824958	0.0162118
0.273582	2.26421	2.26112	2.25011	2.2341	2.21299	2.18238	2.14908	2.1115	2.06179	2.01541	1.95885	1.90266	1.83687	1.77225	1.69479	1.61884	1.53655	1.44865	1.36187	1.26284	1.16734	1.14751	1.12949	1.11483	1.09978	1.08567	1.07118	1.05933	1.04694	1.03642	1.02556	1.0128	1.00085	0.990091	0.980985	0.968247	0.95709	0.946815	0.93587	0.925138	0.912958	0.902331	0.0178009	0.87637	0.864682	0.850593	0.838012	0.824252	0.811635
0.274475	2.27005	2.26486	2.25386	2.23732	2.21397	2.18621	2.15199	2.11306	2.06892	2.01596	1.96477	1.90209	0.0368392	1.7711	1.69587	1.62167	1.53931	1.45106	1.36097	1.26313	1.16844	1.14644	1.13168	1.11444	1.09893	1.08657	1.07206	1.05854	1.04826	1.03565	1.02521	1.01381	1.00016	0.990696	0.97975	0.96868	0.958116	0.94679	0.935303	0.923921	0.913632	0.901383	0.889795	0.876771	0.863767	0.85008	0.837768	0.824081	0.80959
0.275393	2.27408	2.26786	2.2554	2.2401	2.21724	2.1885	2.15451	2.11627	2.07043	2.01974	1.96345	1.90696	1.84381	1.77271	1.69875	1.62214	1.53848	1.45283	1.36243	1.26551	1.16826	1.14862	0.0226092	1.11483	1.10024	1.08564	1.07263	1.06031	1.04809	1.03587	1.0247	1.01364	1.00064	0.990768	0.97945	0.968322	0.956928	0.947407	0.934169	0.925226	0.91285	0.0180291	0.888776	0.876873	0.863743	0.850757	0.836778	0.822821	0.809159
0.276291	2.27773	2.27181	2.25974	2.24328	2.22139	2.19152	2.15626	2.11858	2.07281	2.02396	1.96738	1.90946	1.84279	1.7748	1.7003	1.62201	1.54111	1.45524	1.35886	1.26824	1.16888	1.14987	1.13112	1.11587	1.10006	1.08587	1.07273	1.06083	1.04916	1.03602	1.02376	1.01362	1.00127	0.98965	0.97966	0.967358	0.957028	0.946905	0.93583	0.924417	0.912724	0.899983	0.88846	0.877223	0.8634	0.850118	0.837354	0.821947	0.808317
0.277195	2.28058	2.27387	2.26362	2.24603	2.22209	2.19354	2.16019	2.12433	2.07535	2.02386	1.97167	1.91209	1.84728	1.77598	1.70356	1.6242	1.54146	1.45714	1.35979	1.26669	1.16996	1.1486	1.13178	0.0223096	1.10031	1.08598	1.0736	1.06134	1.04887	1.03652	1.02432	1.01351	1.00069	0.989571	0.978997	0.968519	0.957969	0.946293	0.934941	0.924353	0.911529	0.899677	0.888174	0.876015	0.864606	0.850217	0.836428	0.821743	0.807107
0.278118	2.28302	2.27751	2.26609	2.2512	2.22472	2.19721	2.16582	2.12516	2.07876	2.02845	1.97317	1.91505	1.85201	1.77648	1.70486	1.62516	1.54574	1.45691	1.36234	1.26651	1.17064	1.1499	1.1325	1.11554	1.10148	1.08668	1.07374	1.06139	1.04875	1.03682	1.02425	1.0128	1.00166	0.989217	0.979547	0.968412	0.957047	0.946276	0.934624	0.923659	0.912212	0.899516	0.886707	0.876215	0.863232	0.850545	0.836696	0.820652	0.806362
0.279007	2.28534	2.28014	2.26966	2.25232	2.2295	2.20271	2.16722	2.12971	2.07934	2.03114	0.0395489	0.0383541	1.85119	1.78036	1.70589	1.62765	1.54546	1.45649	1.3644	1.26849	1.17023	1.14953	0.022638	1.11625	1.10191	1.087	1.07414	1.06149	1.0494	1.03688	1.02451	1.01286	1.00121	0.989456	0.978836	0.968342	0.956709	0.945686	0.935211	0.923155	0.911367	0.90019	0.886545	0.874756	0.863551	0.850606	0.835259	0.821957	0.804896
0.279917	0.0457758	2.28293	2.27297	2.25374	2.2324	2.20405	2.17325	2.13078	2.08509	2.03315	1.97812	1.92139	1.85115	1.7851	1.70876	1.62886	1.54405	1.45555	1.36596	1.27121	1.17096	1.14995	1.13207	1.11613	1.10176	1.08762	1.07453	1.05988	1.04941	1.03772	1.02399	1.0131	1.00158	0.988695	0.980401	0.968371	0.956581	0.944836	0.934511	0.923208	0.911295	0.898593	0.887772	0.874799	0.862149	0.847757	0.83612	0.821267	0.804581
0.280831	2.29209	2.28787	2.27512	2.25916	2.23717	2.20952	2.174	2.1322	2.08737	2.03687	1.97951	1.92038	1.85673	0.0357468	1.70554	1.62941	1.54698	1.46187	1.36579	1.27348	1.17131	1.14925	1.13297	1.11641	1.10188	1.08784	1.07419	1.06164	1.05011	1.03682	1.02552	1.01235	1.0014	0.98995	0.978186	0.968561	0.956073	0.945968	0.934317	0.922172	0.0181781	0.899189	0.887485	0.875319	0.861673	0.847417	0.833782	0.820305	0.805543
0.281728	2.29381	2.28975	2.27942	2.26165	2.2403	2.20963	2.176	2.13348	0.0418121	2.03931	1.98502	1.92334	1.85828	1.78429	1.71111	1.63401	1.54814	1.46059	1.3672	1.27258	1.1715	1.14924	1.13265	0.0223357	1.10164	1.08853	1.07467	0.0212444	1.04894	1.03815	1.02535	1.0124	0.0200127	0.989497	0.978858	0.967481	0.95584	0.946252	0.933357	0.921615	0.910667	0.898669	0.887352	0.873988	0.860907	0.847334	0.833287	0.819369	0.805152
0.282617	2.29865	2.29398	2.28229	2.26561	2.24279	2.21259	2.17863	2.13655	2.09337	2.04416	1.98737	1.92579	1.86197	1.78565	1.7135	1.63467	1.54942	1.46251	1.36708	1.27148	1.17325	1.14953	1.13314	1.11743	1.10238	1.08917	1.07486	1.0613	1.04954	1.03804	1.0251	1.01278	0.0200056	0.990243	0.0195785	0.966096	0.955907	0.945782	0.932952	0.921999	0.910603	0.898302	0.886675	0.87418	0.860535	0.846951	0.833441	0.81859	0.80462
0.283556	2.30207	2.2972	2.28584	2.26999	2.24534	2.21637	2.18231	2.13779	2.09448	2.04698	1.99042	1.92725	1.86085	1.79256	1.71608	1.6327	1.54632	1.46733	1.37075	1.27123	1.17174	1.1508	1.13316	1.11584	1.10381	1.08937	1.07575	1.06032	1.05036	1.03715	1.02536	1.013	1.00023	0.989688	0.019573	0.967896	0.955583	0.944984	0.933123	0.921388	0.910092	0.896941	0.885789	0.874107	0.860311	0.847902	0.833587	0.818576	0.803469
0.284456	2.30448	2.30002	2.29076	2.27291	2.24865	2.21962	2.18429	2.1445	2.09728	2.04682	1.99207	1.92824	1.86308	1.79116	1.71825	1.63495	1.54973	1.46552	1.37246	1.27603	1.17192	1.15057	1.13237	1.11763	0.0220528	1.08931	1.07548	1.06251	1.04919	1.03673	1.02508	1.01243	1.00219	0.989559	0.977558	0.967329	0.956149	0.944363	0.933929	0.921126	0.908376	0.897897	0.885176	0.873459	0.860188	0.846208	0.834496	0.818814	0.803135
0.285364	2.30821	2.30279	2.29298	2.27571	2.25037	2.22245	2.187	2.1469	2.10029	2.04889	1.9937	1.9297	1.8628	1.79413	1.71937	1.63808	1.55286	1.46238	1.37134	1.27552	1.17269	1.14991	1.13322	1.11742	1.10317	1.08856	1.07626	1.06229	1.04836	1.03748	1.02489	1.01339	1.00215	0.989129	0.977817	0.966725	0.955104	0.945797	0.018652	0.921657	0.909373	0.896492	0.884812	0.873493	0.858236	0.845858	0.834051	0.818062	0.802193
0.286276	2.31279	2.30675	2.29633	0.0455473	2.2521	2.22649	2.18964	2.15122	2.10202	2.05202	1.99362	1.93396	1.86582	1.79525	1.71693	1.63971	1.55372	1.46361	1.37285	1.27468	1.17389	1.14999	1.13308	1.1177	1.10384	1.08937	1.07629	1.0617	1.05029	1.03584	1.02495	1.01407	1.00157	0.98982	0.977826	0.966313	0.955128	0.944167	0.93392	0.921486	0.909373	0.896432	0.88338	0.872853	0.857241	0.846116	0.833003	0.818481	0.802438
0.287184	2.31543	2.30901	2.29819	2.28263	2.25656	2.22736	2.1917	2.15256	2.10612	2.05309	1.99621	1.93567	1.86864	1.79735	1.71879	1.64184	1.55578	1.46304	1.37159	1.27588	1.17268	1.15099	1.13353	1.11824	1.10357	1.08922	1.0759	1.06411	1.04937	1.03754	1.02525	1.01285	1.00161	0.989932	0.97789	0.966371	0.955023	0.944107	0.933001	0.92082	0.908664	0.89698	0.883675	0.871876	0.857736	0.846095	0.832168	0.817916	0.800957
0.288058	2.31837	2.31332	2.30099	2.28388	2.2594	2.23174	2.19488	2.15411	2.10831	2.05618	1.99953	1.93743	1.87144	1.79743	1.72266	1.63963	1.55689	1.46699	1.37255	1.27389	1.17267	1.15069	1.13396	1.11955	1.10294	1.08935	1.0759	1.06361	1.05014	1.03688	1.02531	1.01371	1.00092	0.98991	0.978401	0.967361	0.955009	0.943582	0.0186267	0.920432	0.908718	0.896397	0.883661	0.871876	0.859165	0.844416	0.830391	0.815939	0.801771
0.288977	2.32222	2.31562	0.0460933	2.28654	2.26218	2.23332	2.19896	2.15816	2.1108	2.06024	2.00077	1.93983	1.87096	1.7998	1.72376	1.64278	1.561	1.46518	1.37379	1.27384	1.17252	1.15033	1.13485	1.1192	1.10391	1.08827	1.07605	1.06375	1.04966	1.03784	1.02572	1.01265	1.00197	0.988807	0.978531	0.966561	0.955873	0.944624	0.931481	0.919693	0.907622	0.8961	0.883664	0.870984	0.857588	0.844498	0.0166111	0.816189	0.80174
0.289888	2.32424	2.31874	2.30775	2.28907	2.26553	2.23721	2.2017	2.15912	2.11376	2.0621	2.00347	1.94297	1.87116	1.80399	1.72386	1.64473	1.5605	1.46744	1.37566	1.27482	1.17307	1.15156	1.13479	1.11891	1.10287	1.08911	1.07582	1.0637	1.05049	1.03874	0.0205178	1.01203	1.00046	0.990001	0.978091	0.966938	0.955821	0.943601	0.932567	0.918522	0.907918	0.89545	0.882955	0.870899	0.857205	0.844554	0.828817	0.815821	0.801046
0.290775	2.32784	2.32235	2.31187	0.0458425	2.26885	2.23949	2.20287	2.1633	2.11844	2.06188	2.00696	1.94397	1.87774	1.80352	1.7275	1.6433	1.56023	1.46676	1.3767	1.27698	1.17406	1.15272	1.13441	1.11798	1.1025	1.08936	1.07723	1.06285	1.0519	1.03803	1.02568	1.01306	1.00151	0.989276	0.97759	0.966161	0.955009	0.943514	0.0186569	0.920359	0.90623	0.895225	0.882475	0.870089	0.857563	0.844245	0.829183	0.814356	0.800601
0.291688	2.33118	2.32474	2.31395	2.29556	2.27296	2.24266	2.20578	0.0433218	2.12121	2.06633	0.040144	1.94653	0.0375809	1.80579	1.73076	1.64563	1.5618	1.47088	1.37539	1.27476	1.17568	1.15425	1.13423	1.1175	1.1039	1.08996	1.07583	1.06288	1.05115	1.03797	1.02617	1.01389	1.00154	0.988947	0.977543	0.966571	0.954021	0.944353	0.931516	0.919529	0.907039	0.894715	0.883106	0.869565	0.856845	0.843879	0.828543	0.814532	0.798974
0.292588	2.33383	2.32849	2.31649	2.29972	2.27589	2.24235	2.20972	2.16893	2.12077	2.06912	2.01315	1.94678	1.88183	1.80986	1.73081	1.64835	1.5632	1.46914	1.37638	1.27707	1.1744	1.15355	1.13543	1.11952	1.10399	1.08803	1.0773	1.0627	1.05081	1.0392	1.02528	1.0141	1.00087	0.992291	0.976487	0.965648	0.954197	0.942801	0.932047	0.91855	0.907237	0.894259	0.882606	0.869049	0.0171541	0.84239	0.829084	0.814498	0.798582
0.293506	0.0467368	2.33176	2.31953	2.30262	2.278	2.24657	2.21192	2.17131	2.12209	2.07078	2.01205	1.95108	1.88268	1.81064	1.73566	1.64833	1.56355	1.47134	1.37668	1.27739	1.17615	1.15405	1.13646	1.11901	1.10382	1.09029	1.07716	1.06392	1.04965	1.0375	1.02587	1.01405	1.00157	0.98946	0.978044	0.967265	0.954149	0.942244	0.931433	0.91899	0.905818	0.894686	0.882051	0.86927	0.857667	0.842219	0.82817	0.814309	0.797842
0.294402	2.3397	2.33385	0.0464692	2.30597	2.28171	2.25028	2.21561	2.17395	2.12248	2.07339	2.01314	1.95337	1.88262	1.81076	1.73591	1.65195	1.56352	1.47191	1.37584	1.27914	1.17667	1.15512	1.13546	0.0224033	1.10524	1.08907	1.07673	1.06407	1.05014	1.0384	1.02579	1.01315	1.00206	0.98978	0.977981	0.966627	0.953874	0.94259	0.930249	0.920045	0.906626	0.89314	0.88221	0.869983	0.856289	0.841934	0.82688	0.813046	0.798935
0.295323	2.34172	0.0466973	2.32607	2.30989	2.28545	2.25451	2.21691	2.17716	2.12679	2.07455	2.01799	1.9536	1.88532	1.81247	1.73867	1.6519	1.56216	1.47641	1.37662	1.27829	1.17653	1.1547	1.13637	1.11969	1.1052	1.09068	1.0771	1.06326	1.05098	1.03779	1.02635	1.01328	1.00173	0.989721	0.97734	0.967138	0.953038	0.943143	0.929885	0.919124	0.906329	0.894152	0.881735	0.870103	0.854659	0.841528	0.826986	0.812694	0.796823
0.296228	2.3457	2.33969	2.32979	2.31283	2.28736	2.25758	2.22191	2.17854	2.13088	2.07703	2.0164	1.95777	1.88761	1.8159	1.7354	1.65436	1.56478	1.47371	1.37957	1.2809	1.17686	1.15509	1.13718	1.12105	1.10453	1.09154	1.0765	1.06381	1.05018	1.03779	1.02618	1.01373	1.00037	0.991238	0.978017	0.965256	0.954055	0.942901	0.93136	0.917728	0.905674	0.894553	0.882477	0.868576	0.854754	0.840364	0.826174	0.811626	0.797831
0.297139	2.34893	2.34458	2.33315	2.31434	2.29093	0.0451996	2.22151	2.18134	2.13371	2.08013	2.02006	1.95602	1.88895	1.81856	1.7378	1.65406	1.56708	1.47744	1.38252	1.28046	1.17771	1.15697	1.13713	0.0224362	1.10576	1.09121	1.07697	1.06291	1.04982	1.03907	1.02624	1.01287	1.00064	0.991246	0.977719	0.965412	0.953223	0.94221	0.930049	0.919817	0.906571	0.893172	0.881406	0.868277	0.853832	0.840095	0.826484	0.810981	0.796119
0.298022	2.3517	2.34704	2.3343	2.31765	2.2944	2.26404	2.22596	2.18336	2.13528	2.08268	2.02192	1.95649	1.89047	1.81678	1.74016	1.65414	1.57068	1.47539	1.38313	1.2847	1.1785	1.15691	1.13794	1.12212	1.10445	1.09119	1.07781	1.06428	1.05016	1.03849	1.02373	1.01392	1.00147	0.990244	0.976958	0.96576	0.953836	0.942642	0.930896	0.918368	0.9051	0.893696	0.880876	0.867553	0.852862	0.840404	0.825753	0.810503	0.797026
0.298922	2.35485	0.0235018	2.33809	2.32032	2.29705	2.26385	2.22876	2.18596	2.13714	2.08524	2.02245	1.9594	1.89178	1.81876	1.73676	1.65724	1.56888	1.48131	1.38097	1.28219	1.17891	1.15685	1.1388	1.12253	1.10656	1.09028	1.07707	0.021284	1.05083	1.03798	1.02541	0.0202662	1.0025	0.98997	0.976607	0.965383	0.952843	0.942664	0.930102	0.918278	0.905828	0.892087	0.881599	0.86778	0.852226	0.0167765	0.825893	0.810755	0.796259
0.299812	2.35902	2.35361	2.34083	2.32469	2.30118	2.2678	0.0446063	2.1888	2.1393	2.0887	2.02457	1.96238	1.89223	1.81876	1.73996	1.6581	0.0314308	1.48161	1.38184	1.28423	1.17882	1.15768	1.13941	1.1229	1.10592	1.09171	1.07699	1.06492	1.05099	1.03936	0.0205008	1.01302	1.00155	0.989708	0.977448	0.965179	0.954206	0.94096	0.929713	0.917818	0.904616	0.89298	0.880438	0.867178	0.852779	0.838795	0.826284	0.808785	0.794365
0.300708	2.36264	2.35663	2.34407	2.32559	2.30201	2.27147	2.23422	2.1915	2.14288	2.08957	2.02943	1.96198	1.8951	1.81902	1.74458	1.65998	1.57315	1.47887	1.38485	1.28542	1.17894	1.15915	1.14018	1.12284	1.10687	1.09114	1.0788	1.0643	1.05144	1.03847	1.02679	1.01314	1.00113	0.0197711	0.97789	0.964502	0.953114	0.941436	0.930299	0.917584	0.905666	0.891784	0.879738	0.865683	0.852259	0.838948	0.825439	0.809108	0.793274
0.301645	2.36426	2.36036	0.0469269	2.32864	2.30462	2.27519	2.23571	2.19349	2.14435	2.09287	2.03062	1.96594	1.8962	1.82282	1.74353	1.66012	1.57096	1.481	1.38576	1.28456	1.18099	1.15881	1.14065	1.12237	1.10776	1.09235	1.07805	1.06541	1.05003	1.03931	1.02743	1.01389	1.00032	0.989477	0.975872	0.96595	0.953381	0.94148	0.929698	0.917638	0.903657	0.893286	0.877695	0.865763	0.851073	0.839266	0.825489	0.808112	0.793279
0.302576	2.36791	2.36224	2.3505	2.33219	2.30749	2.27624	2.23967	2.19361	2.14644	0.0418598	2.03641	1.96755	1.89524	1.82381	1.74418	1.66299	1.57296	0.029609	1.38946	1.28557	1.18111	1.15819	1.14026	1.12426	1.10834	1.09137	1.07901	1.06444	1.0519	1.03913	1.02687	1.0146	1.00086	0.9892	0.977221	0.964474	0.952981	0.94096	0.929648	0.91708	0.904149	0.890803	0.879766	0.864779	0.851748	0.837965	0.823738	0.808261	0.793004
0.303491	2.37218	2.36445	2.35278	2.33476	2.31058	2.27852	2.2417	2.1979	2.15	2.09612	2.0347	1.97264	1.89752	1.82405	1.74501	1.6633	1.57314	1.48394	1.38258	1.28662	1.18167	1.16068	1.14112	1.12372	1.10718	1.09255	1.07952	1.06581	1.05174	1.03926	1.02579	1.01487	1.00068	0.989309	0.019536	0.965198	0.952568	0.940034	0.929749	0.916549	0.904086	0.891379	0.878176	0.864779	0.851302	0.837615	0.821736	0.808187	0.793128
0.304417	2.37329	2.36807	2.35443	2.33816	2.31149	2.27899	2.24548	2.20231	2.15189	2.1006	2.03839	1.97103	1.90293	1.82438	1.74573	1.6641	1.57575	1.48169	1.38688	1.28362	1.18206	1.16042	1.14148	1.12344	1.10848	1.09298	1.07912	1.06584	1.05176	1.03907	1.02687	1.01423	1.00136	0.98922	0.97712	0.964637	0.952511	0.940864	0.928268	0.916206	0.90317	0.89115	0.878434	0.864507	0.850536	0.837404	0.823139	0.807161	0.792624
0.305335	2.37633	2.37094	2.35906	2.33963	2.31234	2.28356	2.24745	2.20651	2.15666	2.10069	2.03895	1.97658	1.90305	1.82509	1.75052	1.66679	1.57575	1.48559	1.38381	1.28627	1.18267	1.16006	0.0228427	1.12376	1.10892	1.09251	1.07969	1.06645	1.05231	1.03699	1.02707	0.0202858	1.00225	0.989298	0.977421	0.964537	0.952431	0.940161	0.928612	0.916126	0.903334	0.890072	0.87763	0.0172728	0.850632	0.837062	0.822182	0.807107	0.792084
0.306264	2.37954	2.37339	2.36137	2.34261	2.31715	0.0457424	2.25233	2.20792	2.15855	2.10158	2.04282	0.039536	0.038118	0.03661	1.7491	1.6673	1.58101	1.48415	1.38624	1.28591	1.18195	1.1606	1.14308	1.12371	1.10985	1.09259	1.08009	1.06511	0.021066	1.03837	1.02714	1.01397	1.0013	0.989763	0.976752	0.965256	0.952274	0.940454	0.928529	0.915379	0.903252	0.889733	0.877373	0.863437	0.849587	0.835631	0.822288	0.807006	0.792137
0.307163	2.38304	0.0475332	2.36306	2.34509	2.3203	2.29067	2.25254	2.20982	2.16017	2.10275	0.0408659	1.98072	1.9088	1.83353	1.75312	1.66761	1.57798	1.48382	1.38815	1.28885	1.18247	1.16109	1.14264	1.12477	1.10921	1.09453	1.07867	1.06631	1.05377	1.03761	1.02787	1.0139	1.00187	0.988957	0.976438	0.964435	0.953779	0.941094	0.927737	0.915109	0.901531	0.889733	0.878283	0.862036	0.849393	0.835396	0.821771	0.807137	0.790876
0.308078	2.3853	2.37818	2.36453	2.34832	2.32292	2.29059	2.25519	2.2146	2.16332	2.10565	2.04475	1.98169	1.91414	1.83728	1.75274	1.66716	1.57769	1.48775	1.38801	1.29038	1.18381	1.15991	1.14186	1.12639	1.10966	1.09455	1.08044	1.06564	1.05177	1.04032	1.0269	1.01417	1.00213	0.989209	0.976155	0.963156	0.952982	0.941396	0.928601	0.913885	0.90249	0.890219	0.875937	0.861854	0.849799	0.83438	0.821755	0.805818	0.790703
0.308978	2.38825	2.38182	2.36839	0.0470024	2.32583	2.29392	2.25893	2.21692	2.167	2.10858	2.05125	1.9828	1.91495	1.83759	1.75381	1.66849	1.57841	1.48771	1.39133	1.28802	1.18426	1.16155	1.14186	1.12589	1.11012	1.09403	0.0216028	1.06774	0.021042	1.04045	1.02658	1.01368	1.00171	0.989069	0.976355	0.964066	0.0190303	0.939987	0.927869	0.914568	0.902373	0.889466	0.876428	0.862008	0.849065	0.835623	0.821072	0.805743	0.788925
0.309875	2.39139	2.3839	0.0474274	2.35328	2.32815	0.0459652	2.26088	2.21679	0.0433723	2.11432	2.04925	1.98643	1.91593	1.83909	1.75533	1.66958	1.58002	1.49203	1.39098	1.28966	1.18376	1.16092	1.14249	1.12552	1.11055	1.09424	1.08068	1.067	1.05329	1.04	1.02654	1.01427	1.00144	0.989472	0.976681	0.963916	0.952094	0.939645	0.928169	0.915216	0.90151	0.889077	0.0175004	0.0172436	0.848486	0.834925	0.81969	0.805142	0.789804
0.31078	2.39351	2.3878	2.37436	0.0471493	2.33102	2.30161	2.26475	2.22126	2.17234	2.11218	2.05385	1.98667	1.91899	1.83704	1.75764	1.67124	1.58328	1.48904	1.39052	1.29184	1.18452	1.16082	1.14333	1.1259	1.11102	1.09527	1.08097	1.06677	1.05379	1.03822	1.02779	1.01376	1.00141	0.990254	0.976791	0.965131	0.951638	0.939164	0.927553	0.914874	0.901422	0.888385	0.874929	0.862562	0.847532	0.833283	0.819325	0.804125	0.789012
0.311683	2.39696	2.39029	2.37823	2.35974	0.0467255	2.30344	2.2658	2.22371	2.17332	2.11505	2.05781	1.99033	1.91963	1.83964	1.76123	1.67134	1.58332	1.49061	1.39014	1.29205	1.18431	1.16092	1.14338	1.12646	1.11183	1.09738	1.0811	1.06585	1.05383	1.03938	1.02771	1.01375	1.00124	0.989953	0.976668	0.965006	0.951249	0.939049	0.92816	0.915127	0.901173	0.888176	0.874053	0.861126	0.847034	0.833462	0.818265	0.805181	0.787686
0.312564	2.39917	2.39321	2.38085	2.36248	2.33804	2.30703	2.26784	2.22389	0.04346	0.0423468	2.06113	1.99332	1.91994	1.84133	1.75925	1.67591	1.58527	1.49145	1.39025	1.28946	1.18432	1.15981	1.14424	1.12795	1.11187	1.09653	1.081	1.06797	0.0210637	1.03925	1.02612	1.01542	1.00128	0.988104	0.976749	0.965006	0.952578	0.94009	0.926602	0.915091	0.900903	0.887594	0.873574	0.861366	0.847777	0.83204	0.818239	0.803209	0.788063
0.313492	2.40148	2.39502	0.047693	2.36624	2.33966	2.30925	2.27103	2.22663	2.1744	2.12265	2.06265	1.99549	1.92149	1.84395	1.76159	1.67475	1.59028	1.49321	1.39114	1.28936	1.1846	1.16095	1.14482	1.1274	1.1105	1.09636	1.08224	1.06726	1.05222	1.04145	0.0205309	1.01436	1.00183	0.988859	0.977377	0.96457	0.951444	0.939344	0.926496	0.913741	0.90137	0.88762	0.873796	0.860655	0.846	0.832983	0.818513	0.802231	0.78671
0.314385	2.40414	2.39831	2.38699	2.36783	2.34298	2.31112	2.27312	2.22722	2.1777	2.12379	2.06393	1.99738	1.92231	0.0369294	1.76482	1.67611	1.58957	1.49479	1.39597	1.28991	1.1848	1.16191	1.14552	1.1278	1.11109	1.0965	1.08139	1.06775	1.05425	1.04005	1.02634	1.01457	1.00161	0.98919	0.976971	0.965485	0.951087	0.939565	0.925929	0.912823	0.901084	0.887461	0.873899	0.860437	0.84569	0.833446	0.816538	0.0160535	0.786143
0.315303	2.40649	2.40244	2.39146	2.37063	2.34517	2.3144	2.27282	2.22894	2.18096	2.12665	2.06843	1.99797	1.92604	1.84933	1.76295	1.67952	1.59025	1.4951	1.39523	1.29005	1.18446	1.16334	1.14267	1.12831	1.11101	1.09678	1.08245	1.06855	1.05316	1.04039	1.02658	1.01383	1.00335	0.989018	0.976224	0.96362	0.95161	0.938809	0.927616	0.912787	0.900267	0.886826	0.873655	0.859675	0.845795	0.832251	0.816862	0.799549	0.787477
0.316201	2.41103	2.40555	2.39288	2.37417	2.34656	2.31408	2.27667	2.23283	2.18449	2.12665	2.0682	2.00099	1.92671	1.85137	1.76402	1.68048	1.58988	1.49559	1.39543	1.29183	1.18484	1.16276	1.14369	1.12873	0.0222283	1.09674	1.08375	1.06683	1.05289	1.04137	1.02662	1.0148	1.00145	0.989482	0.976312	0.963997	0.951409	0.938241	0.926199	0.914037	0.899422	0.886125	0.873544	0.859751	0.846404	0.830325	0.816336	0.801567	0.786107
0.31709	2.41335	2.40814	2.39595	2.37633	2.34971	2.31725	2.27997	2.23648	2.18855	2.12958	2.06723	2.00326	1.92903	1.8519	1.76878	1.68026	0.0318387	1.49607	1.395	1.29368	1.18535	1.16069	1.1449	1.12799	1.1124	1.09758	1.08124	1.06681	1.05466	1.04125	1.02717	1.01434	0.0200255	0.98897	0.976431	0.963688	0.95264	0.938604	0.924224	0.913786	0.900278	0.885798	0.872626	0.859348	0.844377	0.831724	0.81608	0.801253	0.785919
0.318004	2.41749	2.41107	2.39926	2.37906	2.35162	2.32167	2.28364	2.23862	2.18985	2.1303	0.0414366	2.00321	1.93095	1.85492	1.7702	1.68456	1.59116	1.49671	1.39779	1.29329	1.18577	1.16234	1.14579	1.12848	1.11071	1.09725	1.08175	1.06871	1.05415	1.04045	1.02774	1.01374	1.00177	0.988899	0.977399	0.964093	0.95097	0.939347	0.925523	0.912121	0.899094	0.88574	0.872178	0.8593	0.845135	0.830198	0.816257	0.801222	0.784593
0.318904	2.41984	2.41521	2.40035	2.38176	2.35457	2.32442	2.28635	2.24009	2.18886	2.13326	2.07399	2.00628	1.93413	1.85386	1.77221	1.68479	1.59402	1.49739	1.39707	1.29341	1.18544	1.16316	1.14569	1.12863	1.11174	1.09746	1.08308	1.06757	1.05434	1.04065	1.02683	1.01424	1.00196	0.988456	0.97584	0.964089	0.951824	0.938713	0.926054	0.911644	0.899745	0.886702	0.871875	0.858035	0.844212	0.82996	0.814635	0.8013	0.785741
0.31983	2.42341	2.41655	2.40338	2.38322	2.35946	2.32655	2.29027	2.24436	2.19368	2.13538	2.07524	2.00706	1.93421	1.85602	1.77498	1.6866	1.59734	1.49728	1.39704	1.29455	0.0237031	1.16398	1.14501	1.13036	1.1128	1.0971	1.08356	1.06874	1.05323	1.0398	1.028	1.01388	1.00185	0.988095	0.977433	0.963664	0.950261	0.0187691	0.925288	0.912148	0.899388	0.885091	0.871815	0.858282	0.844082	0.829758	0.815465	0.800958	0.784451
0.320727	2.42578	2.41925	2.4061	2.38762	2.36175	2.32949	2.29133	2.24608	2.19731	2.13921	2.07576	2.0064	1.93559	1.85704	1.77652	1.69044	1.59572	1.49669	1.39857	1.29515	1.18706	1.1646	1.14442	1.12935	1.11401	1.09754	1.0827	1.06843	1.05441	1.04022	1.02692	1.01438	1.00183	0.98924	0.976893	0.963797	0.949304	0.937846	0.926065	0.911878	0.899101	0.885167	0.870726	0.858699	0.843668	0.830181	0.814112	0.799897	0.784815
0.321627	2.42909	2.42207	2.40974	2.38919	2.36552	2.33003	2.29364	2.24919	0.0439598	2.14261	2.07904	2.00855	1.93867	1.85768	1.77852	1.69013	1.59538	1.49925	1.39584	1.29758	1.18704	1.16481	1.14669	1.12947	1.11255	1.09882	1.08232	1.0694	0.0210646	1.04061	1.02719	1.01373	1.00235	0.98907	0.976383	0.96293	0.949777	0.93825	0.92507	0.912112	0.8992	0.884732	0.871285	0.859138	0.843359	0.828922	0.81367	0.798989	0.783943
0.32254	2.43168	2.42709	2.41273	2.39299	2.36593	2.33498	2.29482	2.2487	2.20122	2.14099	2.08148	2.0104	1.93828	1.86082	1.77852	1.69123	1.59715	1.49837	1.39889	1.296	1.18753	1.16638	1.14596	1.12936	0.0222692	0.021967	1.08268	1.06914	1.05479	1.04033	1.02619	1.01433	1.00342	0.987754	0.975281	0.962236	0.950808	0.937262	0.924775	0.912454	0.898512	0.884903	0.872067	0.85813	0.84335	0.828492	0.813429	0.798795	0.783543
0.323416	2.4375	2.42855	2.4155	2.39349	2.36878	2.33644	2.2977	2.25119	2.2034	2.14498	2.08287	2.01148	1.93841	1.86255	1.77791	1.69141	1.59832	1.50489	1.3983	1.29451	1.18816	1.1653	1.14688	1.12904	1.11432	1.09801	1.08379	1.06842	1.05541	1.04159	1.02677	1.01319	1.00143	0.988164	0.976377	0.962035	0.95046	0.937896	0.925218	0.911123	0.898851	0.884616	0.871067	0.857108	0.843203	0.82941	0.813881	0.798317	0.781441
0.32431	0.0487722	2.43132	2.41788	2.39597	2.37093	2.33972	2.29996	2.25356	0.0440713	2.14683	2.0844	2.016	1.94049	1.861	1.77962	1.69026	1.60152	1.50394	1.39855	0.0258866	1.18859	1.16629	1.14812	1.12947	1.11451	1.09861	0.0216523	1.06927	1.05436	1.04158	1.02711	1.01387	1.00129	0.987766	0.974398	0.962959	0.95159	0.938141	0.923944	0.911518	0.897315	0.884625	0.871401	0.856076	0.842877	0.829208	0.814393	0.797569	0.781216
0.325221	2.441	2.43335	2.4199	2.40079	2.3745	2.34226	2.30164	2.25556	2.20504	2.14974	2.08666	2.01605	1.94185	1.86528	1.7812	1.69299	1.60181	1.50068	1.39876	1.2975	1.19053	1.16614	1.1477	1.13063	1.11541	1.09716	1.08326	1.07015	1.05407	1.04068	1.02721	1.01523	1.00109	0.987494	0.975378	0.963244	0.950043	0.938182	0.924306	0.910637	0.897772	0.88382	0.87181	0.855626	0.84299	0.827867	0.813132	0.797519	0.781462
0.326125	2.44414	2.43683	2.42222	2.40468	2.37708	2.3441	2.30382	2.25851	2.20746	2.14993	2.08588	2.01667	1.94535	1.86535	1.78654	1.6973	1.59858	1.50134	1.4017	1.29629	1.19036	1.16605	1.14671	1.13173	1.11482	1.09831	1.08333	1.06932	1.05504	1.04018	1.02917	1.01387	1.00136	0.987091	0.975917	0.962488	0.95037	0.937355	0.923726	0.911536	0.897529	0.883304	0.871759	0.855451	0.842265	0.827324	0.811663	0.79762	0.781864
0.327051	2.44795	2.44046	2.42625	2.40651	2.37938	2.34688	2.30541	2.25967	2.20785	2.15258	2.08963	2.02048	1.94481	1.86853	1.78513	1.69704	1.60099	1.50396	1.4044	1.29332	1.19077	1.1678	1.14801	1.13077	1.11431	1.09907	1.08281	1.06859	1.05509	1.04126	1.02686	1.01511	1.00121	0.98935	0.975274	0.96356	0.949183	0.937206	0.923284	0.910682	0.896803	0.882694	0.871819	0.856991	0.842127	0.826998	0.810247	0.796178	0.781834
0.327963	2.45037	2.44286	2.43028	2.40781	2.38189	2.35025	2.30617	2.26163	2.21133	2.15518	2.08983	0.0202337	1.94908	1.86854	1.78527	0.0339087	1.60449	1.50554	1.40424	1.29775	1.19087	1.16794	1.14918	1.13038	1.11536	1.09921	1.08313	1.06925	1.05473	1.04072	1.02865	1.01546	1.00169	0.987555	0.976394	0.962231	0.949934	0.936455	0.0184563	0.910709	0.896418	0.883626	0.870419	0.855855	0.842063	0.82609	0.811067	0.797178	0.779364
0.328891	2.45298	2.44639	2.43171	2.41158	2.38445	2.35146	2.30829	2.26646	2.21213	2.15606	2.09172	2.02437	1.95008	1.87256	1.78887	0.0339453	1.60454	1.50679	1.40083	1.29934	1.19132	1.16826	1.14836	1.13207	1.11606	1.09913	1.08472	1.06918	1.05351	1.04169	1.02808	1.01476	1.0024	0.988117	0.975361	0.963165	0.950536	0.936547	0.922564	0.909458	0.896764	0.883412	0.868381	0.856505	0.840824	0.826424	0.811311	0.795693	0.779946
0.329824	2.45532	2.44815	2.43465	2.41626	2.38756	2.354	2.31331	2.26842	2.21312	2.15822	2.09606	2.02467	1.95094	1.87151	1.78819	1.69872	1.60402	1.50835	1.40063	1.30234	1.19211	1.16913	1.14901	1.13223	1.1165	1.09853	1.08528	1.06943	1.0557	1.04053	1.02662	1.01516	1.00293	0.988005	0.976461	0.963259	0.948515	0.936989	0.923004	0.90954	0.896131	0.880566	0.869851	0.854386	0.840759	0.826601	0.810763	0.796066	0.778806
0.330735	2.45729	2.45086	0.0487596	2.42011	2.38717	2.35631	2.31483	2.26908	2.21454	2.16286	2.09549	2.0264	1.95257	1.87054	1.7884	1.70018	1.60469	1.51175	1.40551	1.29857	1.19308	1.16878	1.14988	1.13181	1.11611	1.09923	0.0217061	1.06975	1.05446	1.042	1.02801	0.0203052	0.999948	0.989933	0.976248	0.963207	0.949028	0.935659	0.923113	0.908361	0.0179189	0.881652	0.868801	0.854907	0.840083	0.82608	0.81077	0.794744	0.779296
0.331649	2.46144	2.45468	2.44089	2.42026	2.39282	2.35838	2.31977	2.27333	2.21763	2.16201	2.0969	2.02941	1.95334	1.87574	1.78873	1.69896	1.60864	1.51127	1.40417	1.30247	1.19293	1.17111	1.1481	1.13294	1.11544	1.09995	1.08627	1.06944	1.05567	1.04072	1.02783	1.01628	1.00095	0.987735	0.976166	0.963278	0.948857	0.935411	0.921625	0.910628	0.896212	0.881768	0.868387	0.85315	0.839188	0.825799	0.810791	0.793968	0.77958
0.332558	2.46356	2.45641	2.44288	2.42345	2.39516	0.0472857	2.32184	2.27294	2.22026	2.16473	2.09887	2.03102	1.95513	1.87837	1.79037	1.70149	1.60798	1.50925	1.40939	1.30119	1.194	1.17011	1.14959	1.13279	1.11579	1.09984	1.0864	1.06971	1.05596	1.04157	1.02762	1.0142	1.00217	0.988566	0.97498	0.963162	0.94815	0.935821	0.922303	0.910322	0.895102	0.881808	0.868062	0.853938	0.839855	0.825586	0.0161936	0.794017	0.777943
0.333455	2.46588	2.45836	0.0488936	0.0484769	2.39711	2.36352	2.32476	0.0455142	2.22608	2.16441	2.09948	2.03596	1.95669	1.87517	1.79168	1.70166	1.60891	1.50926	1.41047	1.30399	1.19417	1.17075	1.14886	1.13291	1.11742	1.10101	1.08473	1.07149	1.05564	1.04052	1.02815	1.01563	0.0200406	0.986768	0.975907	0.962662	0.948889	0.93506	0.922202	0.909008	0.894952	0.881305	0.868668	0.854311	0.839945	0.823429	0.808864	0.794484	0.778761
0.334353	2.46777	2.46131	2.44727	2.42614	2.39863	2.366	2.32642	2.27935	2.22459	2.16771	2.10284	2.03048	1.96271	1.87899	1.79262	1.70094	1.61032	1.51306	1.40718	1.30637	1.19431	1.17018	1.14915	1.13411	1.1161	1.09995	1.08634	1.07103	1.05512	1.04288	1.02801	1.01564	1.001	0.988798	0.974944	0.961369	0.948075	0.93574	0.922877	0.907928	0.895033	0.880642	0.868981	0.854784	0.837967	0.82489	0.808791	0.793558	0.77748
0.335281	2.47183	2.46245	2.45111	2.42919	2.40184	2.3682	2.32687	2.28323	2.22805	2.17057	2.1035	2.03449	1.96239	1.88162	1.79432	1.70362	1.61224	1.51387	1.4095	1.30448	0.0238872	0.0234099	1.15122	1.13329	1.11681	1.10094	1.08585	1.07079	1.05626	1.04243	1.02762	1.01577	1.0013	0.988499	0.975917	0.960879	0.94833	0.935199	0.922543	0.908613	0.895183	0.880213	0.868665	0.853419	0.837901	0.825831	0.807637	0.791841	0.777332
0.336177	2.47397	2.46644	2.45299	2.43115	2.40541	2.37096	2.33052	2.28471	2.23006	2.17418	2.10373	2.03881	1.96271	1.88011	1.79431	1.70981	1.61271	1.51233	1.41191	1.30175	1.19447	1.17155	1.15182	1.13425	1.11638	1.10085	1.08527	1.07127	1.05712	1.04181	1.02862	1.01455	1.00068	0.0197529	0.976996	0.960936	0.947802	0.934891	0.922669	0.909036	0.894665	0.881184	0.0173584	0.852073	0.83891	0.824614	0.807054	0.792035	0.776388
0.337079	2.47609	2.46944	2.45421	2.43354	2.40829	2.37353	2.33404	2.28396	2.23241	2.17573	2.10851	2.04	1.96555	1.8832	1.79566	1.70895	1.61345	1.51448	1.41114	1.3048	1.19461	1.17132	1.1536	1.13273	1.11817	1.10173	1.08537	1.07113	1.05613	1.04214	1.02807	1.01469	0.0100071	0.988295	0.975892	0.961118	0.947708	0.935735	0.922128	0.907813	0.894722	0.882182	0.866483	0.851875	0.837917	0.823317	0.808076	0.792193	0.777675
0.338008	2.47792	2.4704	2.45801	2.43505	2.40947	2.3753	2.33673	2.2883	2.23306	2.17817	2.112	2.04323	1.96575	1.88481	1.79727	1.70847	1.61317	1.51566	1.40923	1.30656	1.19615	1.17037	1.15318	1.13475	1.1183	1.10198	1.08483	1.07122	1.05575	1.04222	1.02945	1.01455	1.00019	0.989281	0.975026	0.960608	0.948644	0.934997	0.921057	0.908569	0.895055	0.880443	0.0173285	0.853646	0.837291	0.822033	0.806435	0.792262	0.777489
0.33891	2.47987	2.47273	2.45958	2.43791	2.41183	2.37739	2.33876	2.29086	2.23535	2.17895	2.11473	0.0408614	1.96601	1.88657	1.80057	0.0342159	1.61434	1.51509	1.41073	1.30761	1.196	1.17156	1.1522	1.13491	1.11805	1.10282	1.08556	1.07067	1.05652	1.04225	1.02912	1.01435	1.00154	0.988566	0.975103	0.960042	0.948075	0.93482	0.922029	0.908146	0.893772	0.880093	0.86706	0.852634	0.837347	0.822894	0.805277	0.791109	0.776031
0.339836	2.48189	2.47431	2.46087	2.44233	2.41318	2.38038	2.34006	2.29284	0.0447685	2.18311	2.11464	2.04622	1.96664	1.88602	1.80546	1.71186	0.0323028	1.51485	1.41176	1.30675	1.19526	1.17146	1.15445	1.13555	1.11756	1.10182	1.08487	1.07228	1.05605	1.04395	1.02707	1.01435	1.00183	0.98904	0.97434	0.960998	0.947456	0.935106	0.921496	0.907724	0.894279	0.879022	0.866223	0.852421	0.837136	0.821555	0.806509	0.791167	0.775927
0.340725	2.48331	2.47655	2.46407	2.44551	2.41583	2.38418	0.0468142	2.29569	2.24271	2.18254	2.12003	2.04764	1.96512	1.88781	1.80237	1.71014	1.6171	1.51938	1.41293	1.30595	1.1961	1.17198	1.1549	1.13572	1.11694	1.10193	1.08692	1.07132	1.05574	1.04421	1.0284	1.01399	1.00113	0.988907	0.974243	0.96166	0.947082	0.936038	0.920804	0.907221	0.894061	0.87868	0.86569	0.851631	0.836118	0.822351	0.806373	0.791507	0.774759
0.341635	2.48662	0.0496053	2.46586	2.44612	2.41953	2.38605	2.3419	2.30028	2.24366	2.18454	2.11692	2.05143	1.96788	1.89169	1.80275	1.71301	1.61869	1.51728	1.41393	1.30629	0.0239132	1.17182	1.15356	1.13629	1.11758	1.10268	1.08742	1.06916	1.05651	1.04313	1.02874	1.01481	1.00191	0.98731	0.976033	0.961145	0.948349	0.933661	0.921108	0.908101	0.89304	0.879797	0.864094	0.850011	0.836363	0.822106	0.805933	0.792297	0.773866
0.342527	0.0248952	2.48323	2.46878	2.44838	2.42169	2.3848	2.34623	2.29957	2.24677	2.18758	2.11937	2.04858	1.97268	1.89085	1.80582	1.71527	1.61849	1.51823	1.41412	1.30786	1.19593	1.17256	1.15313	1.13645	1.11844	1.1027	1.08619	1.07152	1.057	1.04266	1.02922	1.01551	1.00117	0.987601	0.975203	0.960821	0.948443	0.934618	0.921668	0.905979	0.892856	0.878893	0.865221	0.850622	0.836322	0.82013	0.806785	0.789704	0.77516
0.343436	2.49303	2.486	2.4707	2.45105	2.42248	2.38756	2.34834	2.30336	2.24889	2.18759	2.12333	2.04749	1.97515	1.89354	1.80945	1.71443	1.61886	1.51761	1.41478	0.0261639	1.19624	1.17367	1.15323	1.13613	1.11909	1.10404	1.08616	1.07103	1.05644	1.04345	1.03021	1.01474	1.00164	0.98727	0.974149	0.961921	0.94805	0.933605	0.921893	0.90616	0.891715	0.878307	0.866315	0.851171	0.835459	0.819593	0.805102	0.790732	0.774877
0.344322	2.49597	2.48859	2.47322	2.45397	2.42244	2.39178	2.3497	2.30478	2.2511	2.19158	2.12382	2.05212	1.97623	1.89814	1.80663	1.71626	1.6169	1.51692	1.41613	1.31127	1.19624	1.17301	1.15453	1.13577	1.11899	1.10337	1.08728	1.07144	1.05649	1.04333	1.03035	1.01503	1.00194	0.987776	0.974272	0.961288	0.947339	0.933187	0.921902	0.906465	0.891691	0.879031	0.864487	0.849972	0.835703	0.0164167	0.804892	0.788491	0.773889
0.345225	2.49812	2.48976	2.4757	2.45515	2.428	2.3928	2.35242	2.30666	2.25262	2.19155	2.12969	2.05356	1.97714	1.89766	0.0361536	1.71662	0.032416	1.51843	1.41618	1.30906	1.19667	1.17333	1.15398	1.13706	1.11748	1.10275	1.08705	1.0728	1.05704	1.04237	1.0301	1.01555	1.00174	0.988075	0.974307	0.960179	0.947653	0.934232	0.920982	0.905971	0.891174	0.878398	0.864703	0.849105	0.835183	0.82112	0.804962	0.788617	0.773621
0.346128	2.50042	2.49146	2.47747	2.45762	2.42954	2.3975	2.35646	0.0461732	2.25417	2.19375	2.12806	2.05482	1.9765	1.90247	0.0361732	1.71472	1.61989	1.52069	1.41829	1.31023	1.19641	1.17434	1.15308	1.1367	1.11953	0.0220582	1.08677	1.07337	1.05677	1.0425	1.03008	1.01576	1.00129	0.987998	0.974255	0.960926	0.947364	0.934408	0.921072	0.905637	0.891369	0.877037	0.863272	0.850174	0.834979	0.820661	0.804258	0.787726	0.772707
0.347053	2.50219	2.49556	2.47963	2.46112	2.43461	2.40018	2.35783	2.31033	2.25717	2.197	2.13065	2.0583	1.97935	1.90112	1.80749	1.71977	1.61961	1.52178	1.41675	1.31193	1.19613	1.17324	1.15322	1.13741	1.11946	1.10398	1.08676	1.0732	1.05689	1.0432	1.02867	1.01577	1.00203	0.987063	0.97498	0.960773	0.946758	0.935235	0.920062	0.90509	0.890937	0.876711	0.863314	0.848412	0.835232	0.820062	0.805206	0.788174	0.772409
0.347977	2.50507	2.49828	2.48401	2.46006	2.43642	2.4024	2.36176	2.31408	2.25911	2.19585	2.13623	2.06143	1.98261	1.89774	1.80963	1.71703	1.62199	1.52112	1.41884	1.31247	1.19682	1.17228	1.15463	1.1374	1.12005	1.10341	1.08828	1.07214	1.05775	1.04194	1.02854	1.01498	1.00195	0.989106	0.973177	0.960427	0.947779	0.93438	0.920007	0.904928	0.891534	0.876738	0.86337	0.848917	0.834393	0.819543	0.803582	0.0157416	0.772149
0.348921	2.50786	2.49942	2.48543	2.46621	2.43949	2.40356	2.36273	2.31605	2.26338	2.19799	2.13714	2.06025	1.9835	1.89963	1.81061	1.71802	1.6252	1.52332	1.41573	1.31252	1.1972	1.17441	1.15485	1.13595	1.12097	1.10376	1.08841	1.0725	1.05606	1.04333	1.02851	1.01662	1.00076	0.988486	0.974831	0.961031	0.946989	0.933476	0.919656	0.905397	0.891029	0.877293	0.863575	0.848355	0.833319	0.817619	0.803326	0.787524	0.771986
0.349846	2.50976	2.50305	2.48848	2.46731	2.43981	2.40484	2.36583	2.31844	2.26388	2.20264	2.1368	2.06187	1.98318	1.90097	1.81432	1.71843	1.62557	1.52637	1.4192	1.30941	1.1973	1.17415	1.15465	1.13798	1.12117	0.0220726	1.0875	1.07178	1.0574	1.04288	1.02889	1.01583	1.00166	0.987975	0.974528	0.960498	0.946987	0.932905	0.919161	0.0181038	0.891146	0.876578	0.862812	0.848126	0.834279	0.0163452	0.802665	0.787234	0.771346
0.350752	2.51194	2.50451	2.4917	2.47161	2.44115	2.40672	2.36729	2.31988	2.26607	2.20449	2.13872	2.06181	1.98575	1.90197	1.81291	1.72221	1.62746	1.52542	1.4213	1.30964	1.19928	1.17407	1.15519	1.13853	1.12094	1.10349	1.08687	1.07273	1.05756	1.04236	1.0301	1.01683	1.00034	0.988594	0.974301	0.960574	0.945637	0.933349	0.918223	0.905997	0.890828	0.877144	0.86167	0.848633	0.832994	0.817778	0.802906	0.786218	0.770826
0.351654	2.51422	2.50685	2.49218	2.47409	2.44412	2.40875	2.36727	2.32319	2.26966	2.20441	2.13736	2.06386	1.98668	1.90554	1.81473	1.72256	1.62815	1.52717	1.42005	1.31137	1.19875	1.17413	1.15624	1.13838	1.12037	1.10384	1.08786	1.07192	1.05888	1.04236	1.02934	1.01565	1.00069	0.987232	0.975035	0.960322	0.946326	0.932246	0.919611	0.904929	0.890946	0.876814	0.862441	0.847741	0.832742	0.817991	0.801674	0.786787	0.770224
0.352568	2.51596	2.50947	2.49492	2.4761	2.44727	2.41252	2.36865	2.32447	2.26996	2.20803	2.14014	2.07011	0.0397531	1.90546	1.81928	1.72666	1.62418	1.52563	1.42373	1.31283	1.19927	1.17595	1.15588	1.13891	1.1216	1.104	1.08676	1.07294	1.05801	1.04298	1.02881	1.01567	1.00112	0.986704	0.974925	0.960483	0.946837	0.933511	0.917889	0.906384	0.888351	0.876549	0.862248	0.846533	0.832832	0.818166	0.802199	0.785727	0.768731
0.353463	2.51929	2.51238	2.49782	2.47702	2.44956	2.41461	2.37289	0.0465282	2.27035	2.2118	2.14209	2.07031	1.9908	1.9071	0.0364265	1.72602	1.62889	1.52816	1.42182	1.31159	1.20002	1.17642	1.15522	1.13942	1.12067	1.10495	1.08892	1.07322	1.05655	1.04389	1.02993	1.01462	1.00151	0.986852	0.973422	0.961017	0.945703	0.933374	0.919295	0.905395	0.889347	0.875179	0.86162	0.847717	0.832499	0.817544	0.80155	0.784124	0.768983
0.354373	2.52141	2.51434	2.49971	2.48116	2.45028	2.41621	2.37703	2.32768	2.27123	2.21339	2.14532	2.07138	1.99364	1.90945	1.81978	1.72716	1.63066	1.52574	1.42294	1.31157	1.20087	1.17642	1.15648	1.13864	1.12193	1.10413	1.08911	1.07292	1.05893	1.04273	1.02993	1.01549	1.00114	0.986864	0.972831	0.960673	0.947208	0.932605	0.918222	0.904102	0.890304	0.875672	0.861474	0.846647	0.83166	0.816533	0.801208	0.0157026	0.768396
0.355281	2.52392	2.51681	2.50293	2.48283	2.45421	2.42103	2.37864	2.33082	2.27567	2.21507	2.14409	0.041461	1.99122	1.91158	1.82087	1.72837	1.63111	1.52857	1.42251	1.31603	1.19982	1.17684	1.15632	1.14029	1.12244	1.10492	1.08818	1.07271	1.06014	1.04263	1.02914	1.01528	1.00121	0.987875	0.972892	0.960692	0.945154	0.932232	0.919205	0.903876	0.889642	0.874799	0.8601	0.847585	0.832808	0.815688	0.801052	0.783684	0.768642
0.356175	2.52741	2.51875	2.50382	2.48472	2.45849	2.42101	2.38153	2.33476	2.27705	2.21434	2.14877	2.07258	1.994	1.91	1.8218	0.0345562	1.63291	1.5282	1.42529	1.31371	1.20075	1.17769	1.15659	1.13855	1.12245	1.10564	1.08869	1.07349	1.05897	1.04304	1.02863	1.01538	1.00176	0.986999	0.973906	0.95976	0.945756	0.931305	0.917897	0.905288	0.890317	0.874242	0.859823	0.846869	0.833223	0.813538	0.800544	0.784621	0.767638
0.357095	2.52846	2.52049	2.50786	2.48705	2.45785	2.42478	2.38262	2.33484	2.27987	2.21493	2.15038	2.07335	1.99683	1.91432	1.82157	1.73072	1.63619	1.53004	1.42557	1.31309	1.20177	0.02355	1.15726	1.13778	1.12381	1.10522	1.09005	1.07328	1.05816	1.04412	1.02857	1.01532	1.00079	0.988449	0.97263	0.960227	0.945335	0.932056	0.917131	0.904129	0.889468	0.875996	0.860036	0.845994	0.831164	0.815585	0.797755	0.784719	0.768857
0.357994	2.53093	2.52283	2.51086	2.48896	2.46266	2.42799	2.38577	2.33468	2.28256	2.21684	2.15032	2.07824	1.99806	1.91536	1.82368	1.73022	1.63325	1.53294	1.42346	1.31478	1.20215	1.1774	1.15842	1.13892	1.12242	1.10557	1.089	1.07391	1.05898	1.04429	1.02933	1.01527	1.002	0.987323	0.972572	0.958299	0.945737	0.931331	0.919105	0.902565	0.889613	0.874713	0.860327	0.84646	0.830115	0.81483	0.799702	0.783794	0.767043
0.35889	2.53401	2.52591	2.5133	2.49164	2.46321	2.42829	2.38774	2.33932	2.28205	2.22196	2.15097	2.07829	0.0400263	1.91482	1.82562	1.73122	1.63492	1.53489	1.42532	1.31339	1.20193	1.1791	1.15856	1.13884	1.12292	1.10537	1.09063	1.07355	1.05943	1.04423	1.02862	1.01579	1.00125	0.986809	0.973784	0.958323	0.945201	0.932152	0.917411	0.902519	0.888101	0.876189	0.860383	0.844949	0.8304	0.815104	0.79927	0.783219	0.766933
0.359771	2.53693	2.52889	2.51507	0.0498441	2.4664	2.4316	2.39026	2.34132	2.28563	2.21986	2.15314	2.08021	2.00298	1.91958	1.8242	1.73499	1.63395	1.53233	1.42781	1.31769	1.20197	1.17891	1.15971	1.14002	1.12268	1.1065	1.08934	1.07436	1.06003	1.0446	1.02877	1.01476	1.00085	0.986632	0.974001	0.959236	0.945395	0.931842	0.917501	0.901981	0.888215	0.875162	0.860605	0.845545	0.82979	0.813725	0.797763	0.783451	0.76726
0.360661	2.53848	2.53136	2.51469	2.49582	2.46976	2.43324	2.3904	2.34402	2.2855	2.22379	2.156	2.08218	2.00345	1.91845	1.82482	1.73661	0.032741	1.53276	1.42639	1.31556	1.20394	1.17828	1.15951	1.1408	1.12295	1.1068	1.09059	1.07538	1.05875	1.04344	1.02974	1.01507	1.00062	0.985848	0.972863	0.960321	0.945105	0.930767	0.917635	0.903409	0.887643	0.874131	0.859511	0.845037	0.828717	0.0162952	0.799184	0.781677	0.766152
0.361591	2.54135	2.53466	2.51975	2.49841	2.47106	2.43654	2.39306	2.34453	2.29156	2.22391	2.15867	2.08412	2.00434	1.92083	1.82971	0.0346573	1.6381	1.53651	1.42363	1.31813	1.2033	1.17871	1.1598	1.14154	1.12346	1.10643	1.09053	1.07407	1.06084	1.04471	0.0205826	1.01433	1.00024	0.987715	0.973687	0.957681	0.944532	0.931483	0.917275	0.901801	0.888974	0.874332	0.858788	0.84521	0.828407	0.813899	0.797903	0.781341	0.767498
0.362498	2.54306	2.53539	2.52342	2.50077	2.47514	0.0487629	2.3967	2.34826	2.29029	2.22766	2.15905	2.0862	2.00444	1.92035	1.8354	1.73313	1.63565	1.53784	1.42776	1.31668	1.20425	1.17878	1.15992	1.141	1.12381	1.1077	1.09054	1.07483	1.06013	1.04347	1.03003	1.01543	1.00019	0.987652	0.971399	0.958828	0.945435	0.931023	0.916427	0.90272	0.888366	0.873917	0.860041	0.843521	0.82913	0.813751	0.796844	0.781667	0.766658
0.363395	0.0509497	2.53886	0.0504957	2.50392	2.47539	2.44069	2.39657	2.34988	0.0458423	2.22802	2.16488	2.08587	2.0082	1.92251	1.83144	1.73729	1.64015	1.5366	1.42667	1.31734	1.20393	1.18119	1.15988	1.14156	1.12368	1.10776	1.0918	1.07478	1.06016	1.04399	1.02796	1.01509	1.00229	0.987494	0.972769	0.959089	0.945049	0.930261	0.916013	0.90219	0.889169	0.873254	0.858886	0.844794	0.827855	0.813809	0.796867	0.780523	0.766213
0.364293	2.5499	2.5413	2.52738	2.50578	2.4773	2.44243	2.39909	2.34891	2.29414	2.23198	2.16367	2.08795	2.00869	1.92254	1.83337	1.73683	1.64173	1.53471	1.4259	1.31625	1.20491	1.18101	1.15976	1.14124	1.12565	1.1074	1.09078	1.07491	1.05998	1.04511	1.03002	1.01522	1.00062	0.986752	0.973971	0.958718	0.945086	0.929681	0.91577	0.902082	0.887791	0.872959	0.858575	0.844468	0.829815	0.81137	0.797006	0.78063	0.765299
0.365228	2.55184	2.54432	2.53169	2.50935	2.47991	2.44312	2.40025	2.35068	2.2978	2.23433	2.16463	2.09057	2.00686	1.92613	1.83305	1.74027	1.64053	1.5331	1.42662	1.31823	1.20622	1.18041	1.16135	1.14167	1.12385	1.10839	1.0911	1.07636	1.05994	1.04568	1.02972	1.01595	1.00009	0.986179	0.972882	0.958951	0.945205	0.929223	0.915914	0.901982	0.8873	0.872972	0.860019	0.843268	0.828269	0.811386	0.797578	0.780811	0.764935
0.366121	0.0510642	2.54718	2.53223	2.51162	2.48433	2.44357	2.40269	2.35186	2.298	2.23543	2.16732	2.08954	2.00925	1.92727	1.83274	1.7404	1.64146	1.53483	1.42726	1.3174	1.20583	1.18146	1.16082	1.14247	1.12444	1.10867	1.09097	1.07775	1.05978	1.04497	1.02964	1.01502	1.0009	0.98633	0.973015	0.958156	0.943648	0.930099	0.915328	0.901325	0.887587	0.872989	0.858354	0.843317	0.827229	0.81322	0.795636	0.781253	0.765322
0.367045	2.55653	2.54972	2.53457	2.51506	2.48452	2.44819	2.40405	2.3556	2.2976	2.23431	2.16971	2.08907	2.01118	1.92754	1.83606	1.73803	1.63968	1.5379	1.42816	1.31879	1.20623	1.18255	0.0232431	1.1405	1.12432	1.10859	1.09225	1.07568	1.06017	1.04523	1.03057	1.01571	1.0003	0.987585	0.971409	0.95779	0.943709	0.929884	0.915904	0.900759	0.886717	0.8726	0.857625	0.84256	0.828784	0.811826	0.795	0.780178	0.765872
0.367939	2.55843	2.55284	2.5359	2.51683	2.48765	2.44949	2.40647	2.35707	2.29881	2.23669	2.16754	2.09502	2.01163	1.92943	1.83761	1.73905	1.64189	1.53823	1.43127	1.31769	1.20592	0.0236395	1.16226	1.14186	1.12506	1.10649	1.093	1.07758	1.0589	1.04452	1.02996	1.01614	1.00165	0.986393	0.972388	0.957985	0.944404	0.9296	0.915553	0.901154	0.885711	0.871958	0.85693	0.84251	0.828808	0.811325	0.795746	0.780789	0.76452
0.368855	2.56127	2.55356	2.53879	2.51913	0.0498046	2.45237	2.40976	2.35944	2.3031	2.2387	2.17364	2.09071	2.01476	1.92696	1.84205	1.7417	1.64419	1.53759	1.4304	1.31935	1.20599	1.18272	1.16232	1.14269	1.12574	1.10755	1.09242	1.07647	1.05999	1.04519	1.03036	1.016	1.00119	0.0197148	0.971493	0.959189	0.944329	0.929685	0.914634	0.90014	0.887028	0.87242	0.856602	0.841247	0.828596	0.811055	0.796323	0.779336	0.763696
0.369754	2.56468	2.55748	2.54143	2.52021	2.49469	2.45279	2.41175	2.36007	2.30294	2.24031	2.17426	2.09592	2.01468	1.93047	1.83661	1.7486	1.64363	1.53989	1.42977	1.32035	1.20646	1.18262	1.16211	1.14338	1.12517	1.10807	1.092	1.07583	1.06055	1.04527	1.03109	1.01646	1.00058	0.986959	0.970181	0.958399	0.943635	0.930243	0.914517	0.902028	0.884852	0.87168	0.857953	0.841296	0.826439	0.813375	0.794596	0.778821	0.763199
0.370698	2.56788	2.55984	2.5445	2.52362	2.4945	2.45688	2.4122	2.3631	2.30468	2.24128	2.17176	2.09995	2.01955	1.93074	1.84007	1.74538	0.0329153	1.54135	1.43212	1.32137	1.207	1.18236	1.16262	1.14364	1.12678	1.10778	1.0925	1.07592	1.06068	1.04591	1.03029	1.0164	1.00006	0.987125	0.971515	0.957576	0.943756	0.929184	0.91486	0.899935	0.886198	0.871586	0.856734	0.841075	0.827368	0.810416	0.794759	0.778851	0.762671
0.371589	2.57091	2.563	2.54669	2.52334	2.49658	2.45859	2.41586	2.36556	2.30834	2.24191	2.17486	2.10019	2.02061	1.93229	1.84197	1.74307	1.64712	1.54385	1.43368	1.31885	0.024142	1.18194	1.16369	1.14483	1.12616	1.10819	1.09284	1.07584	1.06168	1.04543	1.03001	1.01617	0.998932	0.987628	0.972297	0.958076	0.9429	0.929871	0.915067	0.900122	0.884835	0.870467	0.857151	0.0168347	0.826474	0.809761	0.794445	0.778763	0.762753
0.372489	2.5741	2.56658	2.5514	2.52681	2.49862	2.46253	2.41722	2.36882	2.30927	2.24542	2.17764	0.0419864	2.01965	1.93543	1.84416	1.74751	1.64764	1.54247	1.43391	1.32129	1.20668	1.18342	0.023254	1.14348	1.12614	1.10885	1.09299	1.07727	1.06008	1.0452	1.03072	1.01462	1.0009	0.985991	0.973264	0.958551	0.942103	0.929858	0.91467	0.900187	0.884589	0.870273	0.857817	0.84017	0.826224	0.809235	0.794006	0.778681	0.762263
0.373431	2.57685	2.56749	2.55315	2.5308	2.50098	2.46271	2.42035	2.36758	2.31451	2.24527	2.17621	2.10588	2.01998	1.93706	1.84521	1.7479	1.64835	0.0308561	1.43559	1.32357	1.20659	1.18395	1.16269	1.1441	1.1257	1.10911	1.09285	1.07716	1.06013	1.0452	1.03054	1.01534	1.00055	0.987137	0.972572	0.958023	0.942813	0.928544	0.914418	0.899147	0.885285	0.872459	0.856688	0.840447	0.824474	0.809469	0.793919	0.777228	0.762374
0.374364	2.57735	2.57026	2.5567	2.53156	2.50079	2.46708	2.4206	2.37146	2.31348	2.24986	2.17809	2.10648	2.0233	1.93837	1.84523	1.7479	1.64833	1.54494	1.43451	1.32169	1.20728	1.18237	1.16349	1.14505	1.12623	1.10901	1.09243	1.07619	1.06192	1.04457	1.02987	1.0149	1.00057	0.987759	0.972498	0.957562	0.942925	0.928717	0.913409	0.900925	0.884777	0.87168	0.855964	0.839517	0.825423	0.809285	0.793807	0.777503	0.762687
0.375276	2.58019	2.57195	2.55896	2.53343	0.0500693	2.46948	2.42387	2.37059	2.31671	2.2533	0.0436653	2.10666	2.02146	1.93618	1.84696	1.75041	1.6496	1.54284	1.43779	1.31968	1.20762	1.18361	1.16422	1.14346	1.12533	1.10952	1.09329	1.07728	1.05998	1.04563	1.03113	1.01527	1.00109	0.986935	0.971086	0.959098	0.943691	0.927548	0.913742	0.899441	0.885137	0.870667	0.856143	0.839794	0.82505	0.809314	0.793942	0.778241	0.761217
0.376174	2.58272	0.0514855	2.55899	2.53459	2.50806	2.46846	2.42629	2.37609	2.31832	2.25469	2.18589	2.10805	0.0404626	1.93773	1.84834	1.75401	1.64888	1.54618	1.43491	1.32078	1.20732	1.18228	1.16229	1.14368	1.12545	1.10983	1.09402	1.0756	1.06166	1.04613	1.02982	1.01551	1.00169	0.986735	0.971664	0.958033	0.943781	0.927423	0.914409	0.899681	0.884278	0.869757	0.856805	0.839379	0.82405	0.810088	0.793791	0.777071	0.762354
0.377072	2.58432	0.0515565	2.56329	2.53826	2.50884	2.47149	2.42594	2.3766	2.3194	2.25677	2.18557	2.11099	2.0257	1.93867	1.84842	1.75547	1.64887	1.54735	1.43397	1.32537	1.20714	1.1838	1.16175	1.14423	1.12737	1.1088	1.09333	1.07718	1.06173	1.04563	1.03103	1.01533	1.00145	0.986314	0.972094	0.9575	0.942576	0.928027	0.914111	0.900186	0.883698	0.871009	0.855498	0.839941	0.82398	0.808546	0.793398	0.776445	0.762273
0.377972	2.58739	2.57965	2.56376	2.54308	2.51177	2.47248	2.43058	2.37928	2.32303	2.2575	2.18638	2.11011	2.02815	1.93941	1.85056	1.75619	1.65127	1.54517	1.43569	1.32283	1.20729	1.18346	1.16326	1.1439	1.12703	1.11033	1.09306	1.07644	1.06225	1.04557	1.03197	1.0159	1.00161	0.986314	0.971321	0.957124	0.942271	0.928169	0.913733	0.900023	0.884449	0.869218	0.855127	0.840438	0.824045	0.808621	0.791771	0.77649	0.761641
0.378859	2.58999	2.582	2.56697	2.54451	2.51344	2.47523	2.43262	2.38384	2.32285	2.25987	2.18585	2.11341	0.040539	1.93855	1.85247	1.75553	0.0330315	1.54953	1.43808	1.3234	1.20732	1.18358	1.16356	1.14532	1.12713	1.1101	1.09327	1.0775	1.06143	1.04671	1.03148	1.01515	1.00189	0.986299	0.972701	0.0191099	0.941676	0.928769	0.914057	0.899315	0.883643	0.869748	0.854392	0.840129	0.824452	0.808457	0.792468	0.776191	0.759338
0.379759	2.59267	2.58489	2.56876	2.54485	2.51413	2.47799	2.43493	2.38692	2.32632	2.26317	2.19027	2.11541	2.02897	1.93904	1.85261	1.75476	1.65393	1.54871	1.43759	1.32455	1.20784	1.18385	1.16373	1.14598	1.1272	1.11003	1.09375	1.07804	1.06188	1.04584	1.03121	1.01684	1.00215	0.986704	0.970537	0.956896	0.941302	0.927854	0.91349	0.89892	0.885418	0.869094	0.853584	0.839729	0.8239	0.807659	0.791469	0.776005	0.759571
0.380666	2.59507	2.58783	2.5716	2.54825	2.51568	2.47967	2.43556	2.38849	2.33013	2.26302	2.19247	2.11601	2.03241	1.94272	1.85193	1.75683	1.65339	1.54994	1.43969	1.32036	1.20783	1.18473	1.16155	1.1456	1.12826	1.11054	1.09402	1.07745	1.06196	1.04825	1.02987	1.01639	1.00028	0.987539	0.970614	0.956972	0.942784	0.926492	0.913355	0.898803	0.884893	0.868607	0.85459	0.839354	0.822954	0.807537	0.791403	0.775976	0.760447
0.381559	2.59775	2.5887	2.57338	2.55085	2.52069	2.48237	2.43519	2.38686	2.3324	2.26584	2.19199	2.11749	2.03308	1.94696	1.85501	1.75956	1.65522	1.54806	1.43996	1.32221	1.20771	1.18309	1.16396	1.14494	1.12641	1.11006	1.09583	1.07895	1.06117	1.04633	1.03116	1.01697	1.00077	0.985375	0.972452	0.957014	0.943002	0.926565	0.913715	0.898265	0.883397	0.0173877	0.854288	0.837104	0.82315	0.808171	0.791283	0.775842	0.758977
0.38248	2.59938	2.58965	2.57529	2.55177	2.52223	2.48473	2.43943	2.38722	2.33279	2.26735	2.19536	2.11866	2.03467	1.946	1.85738	1.75844	1.65613	1.54501	1.44416	1.3241	1.20804	1.18295	1.1637	1.14553	1.12816	1.11183	1.09353	1.07874	1.06238	1.0461	1.03133	1.01523	1.00112	0.985641	0.971402	0.957585	0.943382	0.92774	0.913661	0.897527	0.884302	0.868576	0.853271	0.837161	0.822129	0.807121	0.791288	0.775566	0.758693
0.383374	2.6014	2.59145	2.57575	2.55557	2.52387	2.48454	2.43934	2.39299	2.33287	2.27092	2.19831	2.11871	2.03613	1.94647	1.85478	1.75893	1.65955	1.5503	1.44221	1.32244	1.20824	1.18386	1.16415	1.14625	1.12765	1.11211	1.09545	1.0771	1.06294	1.04641	1.03069	1.01601	1.00131	0.98582	0.970611	0.958004	0.942252	0.928767	0.912363	0.897749	0.883307	0.869154	0.853188	0.837487	0.82164	0.806455	0.790946	0.774241	0.757936
0.384271	2.60187	0.051915	2.57932	2.55648	2.52438	2.48857	0.0488419	2.39473	2.33599	2.26739	2.20101	2.12246	2.03721	1.95001	1.85846	1.75912	1.66068	1.5482	1.44266	1.3261	1.20852	1.18322	1.16499	1.14627	1.12807	1.11156	1.09602	1.07738	1.06241	1.04498	1.03031	1.01656	1.00122	0.98647	0.971906	0.956662	0.943771	0.928062	0.912219	0.897276	0.882849	0.868676	0.852495	0.836949	0.821514	0.806743	0.790737	0.774524	0.756934
0.385193	2.6034	2.59784	2.58189	2.55828	2.52867	2.48947	2.44516	2.39652	2.33422	2.27218	2.20172	2.12396	2.04091	1.95486	1.85614	1.75985	1.65934	1.55204	1.44316	1.32662	1.20942	1.18393	1.16367	1.14739	1.12859	1.1116	1.09418	0.0215597	1.06197	1.04689	1.02943	1.01496	1.00225	0.985387	0.973124	0.957129	0.943351	0.927477	0.912246	0.896614	0.883643	0.866324	0.853507	0.837405	0.821538	0.805077	0.789564	0.774204	0.756925
0.386064	2.60637	2.5996	0.0516842	2.56238	2.53056	2.49204	2.44757	2.39643	2.33636	2.27245	2.20394	2.12494	2.04166	1.95574	1.86044	1.76004	1.65992	1.5559	1.44126	1.32658	1.2086	1.18358	1.16632	1.14859	1.12758	1.11129	1.09532	1.07843	1.06267	1.04507	1.03076	1.0158	1.00048	0.986832	0.97158	0.957752	0.942831	0.927639	0.912706	0.896316	0.882136	0.867124	0.853785	0.837862	0.82125	0.805322	0.788402	0.774092	0.754803
0.386977	0.0521686	2.60215	2.5868	2.56241	2.53292	2.49543	2.44818	2.39534	2.3394	2.2746	2.20459	2.12594	2.04261	1.95746	1.86175	1.76261	1.66398	1.55293	1.44286	1.32801	1.20863	1.18506	1.16604	1.14667	1.12929	1.11154	1.09551	1.07868	1.06119	1.0459	1.03167	1.01646	1.00023	0.98583	0.971124	0.957856	0.9428	0.92688	0.912336	0.896454	0.882362	0.867701	0.853113	0.83765	0.821516	0.804314	0.789627	0.771881	0.755679
0.387861	2.61052	2.60235	2.59002	2.56446	2.53302	2.49825	2.45231	2.39921	0.0468292	2.27553	2.20371	2.12865	2.04681	1.95579	1.86496	1.76473	1.65986	1.55486	1.4455	1.32829	1.21084	1.18532	1.16437	1.14578	1.1294	1.11317	1.09523	1.07793	1.06197	1.04656	1.03199	1.01573	1.00048	0.986907	0.970818	0.957519	0.940222	0.928327	0.910931	0.898434	0.882029	0.867253	0.851845	0.837609	0.821251	0.805641	0.788577	0.772529	0.755963
0.388768	2.61289	2.60418	2.58986	2.56687	2.53621	2.49875	0.0490613	2.39974	2.34404	2.27985	2.20625	0.0425441	2.0469	1.95838	1.86474	1.76084	1.66274	1.55881	1.44399	1.32816	1.21115	1.18578	1.16547	1.14727	1.13022	1.11018	1.09501	1.07874	1.06228	1.04603	1.03141	1.01489	1.00188	0.986013	0.971228	0.9569	0.942152	0.927478	0.910534	0.898605	0.882395	0.86617	0.851652	0.83699	0.822155	0.804898	0.789657	0.771307	0.755073
0.389683	2.61482	2.60711	2.59125	2.56882	2.53738	2.4996	0.0491383	0.0480844	2.3472	2.28138	2.20411	2.13066	2.04719	1.95891	0.0372885	1.76483	1.6609	1.55889	1.44507	1.32571	1.21182	1.18487	1.16677	1.14753	1.12876	1.11321	1.09369	1.07815	1.06292	1.04607	1.03178	1.01496	1.00101	0.986584	0.971467	0.0191606	0.941589	0.925887	0.91158	0.897179	0.881987	0.86644	0.851872	0.837528	0.822275	0.803629	0.788278	0.769931	0.75529
0.390602	2.61734	2.60861	2.59375	2.56837	2.53871	2.50505	0.0491997	2.40545	2.34837	2.28086	2.20699	2.13143	2.04642	1.96021	1.86586	1.76743	1.66461	1.5561	1.445	1.33063	1.21129	1.18625	1.1659	1.14911	1.12901	1.11113	1.0949	1.07828	1.06305	1.04668	1.032	0.0203	1.00013	0.987257	0.971444	0.956658	0.942433	0.92668	0.910805	0.017935	0.882188	0.86694	0.851938	0.836036	0.820576	0.803298	0.787755	0.770541	0.756111
0.391538	2.61797	2.60929	2.59543	2.57141	2.54079	2.50593	2.46331	2.40805	2.34662	2.28288	2.20983	2.13313	2.05102	1.9616	1.86471	1.76772	1.6637	1.5561	1.44518	1.33023	1.21246	0.0237281	1.16727	1.14894	1.12943	1.11219	1.09442	1.07885	1.06216	1.04633	1.03191	1.0152	1.00042	0.986801	0.971289	0.95661	0.941614	0.926868	0.911273	0.896326	0.881287	0.867221	0.851129	0.836493	0.820487	0.804649	0.78606	0.772208	0.754103
0.392446	2.61878	2.61152	2.59453	2.57452	2.54354	2.50822	2.46408	2.41006	2.34929	2.28418	2.21064	2.13565	2.0514	1.96318	1.86506	1.76949	1.66157	1.55633	1.44448	1.33204	1.2124	1.18771	1.16735	1.14705	1.13019	1.11214	1.09583	1.07883	1.06223	1.0471	1.03104	1.01618	1.00063	0.987326	0.97041	0.956553	0.940627	0.92609	0.912796	0.895975	0.880579	0.867584	0.851444	0.835148	0.820447	0.804629	0.787806	0.770169	0.753586
0.393343	2.62128	2.61266	2.59971	2.57552	2.54669	2.51208	2.46347	2.41157	2.3549	2.2861	2.2129	2.13612	2.05103	1.96304	1.86573	1.77079	1.66354	1.55668	1.44338	1.33322	1.21264	1.18668	1.16715	1.15031	1.12989	1.11223	1.09533	1.07905	0.0212568	1.04582	0.0206467	1.01616	1.00155	0.984733	0.970611	0.956258	0.942121	0.924935	0.913075	0.895453	0.881574	0.866491	0.850791	0.836118	0.818928	0.804703	0.786328	0.0153995	0.754219
0.394258	2.6239	2.61463	2.60131	2.57817	2.54912	2.51152	2.46397	2.4122	2.35763	2.2901	2.21568	2.13656	2.05178	0.0392828	1.86597	1.77033	1.6626	1.5609	1.44402	1.3328	1.21267	1.18921	1.16644	1.14869	1.13053	1.11251	1.09608	1.07963	1.06186	1.04684	1.03122	1.01494	1.00171	0.985859	0.971325	0.956486	0.940972	0.926553	0.910283	0.896679	0.88082	0.867103	0.849827	0.83615	0.819272	0.803197	0.787209	0.770757	0.752655
0.395187	2.62672	2.61784	2.60263	2.5807	2.55099	2.51117	2.4669	2.41509	0.0471295	2.29232	2.21604	2.1394	2.05411	1.96404	1.87056	1.76841	1.66712	1.55915	1.44696	1.32972	1.21413	1.18787	1.16849	1.14866	1.13042	1.11329	1.09493	1.07876	1.06444	1.04672	1.03154	1.01532	1.00123	0.985511	0.970921	0.95574	0.941355	0.925386	0.912003	0.895518	0.880446	0.865358	0.851903	0.835922	0.818857	0.802691	0.786619	0.769507	0.753666
0.39607	2.62713	2.62073	0.0520969	2.58105	2.5526	2.51346	2.46864	2.41712	2.3583	2.2906	2.21897	2.1407	2.05461	1.96439	1.87182	1.76801	1.66879	1.56154	1.44732	1.33063	1.21423	1.18942	1.1685	1.14805	1.13102	1.11195	1.09659	1.07872	1.06392	1.04729	1.03063	1.0157	1.00088	0.98584	0.972356	0.955554	0.939665	0.926625	0.910337	0.89498	0.880724	0.866089	0.850825	0.83439	0.819107	0.803283	0.786657	0.769202	0.753012
0.397002	2.62923	2.62173	2.60804	2.58423	2.55365	2.51864	2.46985	0.0484097	2.3591	2.29022	2.21867	2.14315	2.05961	1.96672	1.87102	1.77071	1.66619	1.56196	1.4477	1.33113	1.21528	1.18814	1.16754	1.14976	1.12923	1.11321	1.09653	1.08062	1.06313	1.04645	0.0206237	1.01664	1.00054	0.98568	0.970472	0.956301	0.0188013	0.927528	0.909688	0.895733	0.879972	0.863773	0.85144	0.833958	0.819065	0.803275	0.785747	0.769589	0.752076
0.397913	2.63133	2.6252	2.60982	2.5869	2.55505	2.51962	2.47033	2.4202	2.36283	2.29335	2.22088	2.145	2.05935	1.96663	1.87386	1.77322	1.66691	1.56095	1.45036	1.33244	1.21479	1.18873	1.16813	1.14925	1.13174	1.11151	1.09657	1.08049	1.06279	1.04646	1.03295	1.01669	1.00122	0.984798	0.971024	0.95554	0.940658	0.926518	0.910427	0.894865	0.879619	0.865658	0.849656	0.834488	0.818433	0.801244	0.786528	0.769291	0.751121
0.398832	2.63468	2.62732	2.61047	2.58902	2.55683	2.51977	2.47458	2.42394	2.35979	2.29654	2.22323	2.14373	2.06162	1.97129	1.87417	1.77333	1.66946	1.55933	1.45158	1.33367	1.21563	1.19002	1.16993	1.14928	1.13013	1.11457	1.0961	1.07881	1.06329	1.04746	1.03143	1.01616	1.00105	0.98611	0.971509	0.954969	0.941175	0.926038	0.910328	0.895599	0.878947	0.865048	0.848837	0.833713	0.818058	0.801847	0.785571	0.7681	0.750566
0.399735	2.6362	2.62943	2.61272	2.58945	2.55941	2.52147	2.47711	2.4246	2.36528	2.29863	2.22385	2.14533	2.06237	1.96847	1.87474	1.77336	1.67091	1.56555	1.44936	0.0266332	1.21668	1.18944	1.17071	1.14855	1.13262	1.11394	1.09549	1.07899	1.06374	1.04717	1.0312	1.01619	1.00184	0.986196	0.970268	0.955645	0.941056	0.92611	0.910373	0.895728	0.878685	0.864419	0.848993	0.83338	0.816808	0.802139	0.78411	0.768011	0.750648
0.400633	2.63916	2.63128	2.61512	2.59166	2.56191	2.52295	2.47608	2.42765	2.36635	2.30328	2.22565	2.14475	2.06161	1.97031	1.87271	1.77429	1.6752	1.56525	1.44887	1.3366	0.0243251	1.18902	1.16995	1.15013	1.13208	1.11413	1.09533	1.07981	1.06353	0.0209317	1.03272	1.01736	0.999536	0.985822	0.971199	0.954922	0.941841	0.924312	0.911337	0.89411	0.879486	0.865048	0.848553	0.833893	0.816437	0.801046	0.783401	0.768747	0.750808
0.401533	2.64248	2.63462	2.61698	2.59253	2.56276	2.52436	2.47882	2.42983	2.36842	2.30392	2.22615	2.14637	2.06219	1.97228	1.87172	1.77931	1.67133	1.5643	1.45356	1.3349	1.21682	1.18961	1.1687	1.15146	1.13106	1.11368	1.09649	1.07973	1.06437	1.04745	1.0327	1.01606	1.00022	0.986273	0.971238	0.954593	0.940527	0.924447	0.910418	0.894468	0.880081	0.864411	0.848601	0.833437	0.816892	0.799988	0.783381	0.767929	0.750405
0.402442	2.64693	2.63782	2.62122	2.59423	2.56439	2.52647	2.48493	2.431	2.36987	2.30292	2.23009	2.14822	2.06381	1.97188	1.87545	1.77499	1.67457	1.5626	1.45318	1.33579	1.21634	1.19167	0.0233895	1.15054	1.13317	1.11287	1.09683	1.07989	1.06354	1.04838	1.03124	1.0169	1.00018	0.986286	0.971871	0.956486	0.938613	0.923933	0.90913	0.894848	0.879481	0.864967	0.848837	0.833143	0.816444	0.799731	0.783058	0.76781	0.749346
0.40336	2.64761	2.64034	2.62147	2.59766	2.56647	2.53002	2.48415	2.43252	2.36999	2.30639	2.22971	2.14864	2.06442	1.97546	1.87432	1.7803	1.67304	0.0312992	1.45031	1.33667	1.21734	1.19225	1.1703	1.15031	1.13276	1.11363	1.09679	1.08094	1.0629	1.04799	1.03227	1.01574	1.00082	0.985481	0.971221	0.956287	0.0187799	0.92508	0.909075	0.894209	0.879678	0.863843	0.848307	0.832712	0.816276	0.800171	0.783213	0.767081	0.749984
0.404278	2.65035	2.64144	2.62453	2.59923	0.0513864	2.53169	2.48561	2.43149	2.37337	2.30729	2.22855	2.15326	2.06621	1.97492	1.87799	1.7766	0.0334984	1.56482	0.0290747	1.33809	1.21771	1.19151	1.17131	1.1511	1.13197	1.11382	1.09774	1.07967	1.06309	1.04788	1.03112	1.01607	1.00077	0.986745	0.970572	0.956253	0.941072	0.923786	0.908283	0.893884	0.879645	0.862723	0.848568	0.832435	0.816877	0.798778	0.783631	0.766672	0.749784
0.405178	2.65128	2.64272	2.62657	2.60218	2.57282	2.53316	2.48624	2.43544	2.37783	2.30695	2.23266	2.15059	2.06804	1.97769	1.88112	1.77647	1.6731	1.56881	1.45328	1.337	1.21804	1.19366	1.17087	1.15173	1.13263	1.1145	1.0969	1.07936	1.06372	1.04734	1.03191	1.01622	1.00061	0.986804	0.971041	0.954789	0.938753	0.92506	0.908922	0.89382	0.878928	0.864838	0.847293	0.832761	0.816323	0.799478	0.78148	0.765534	0.748854
0.406093	2.65224	2.64479	2.62885	2.60577	2.5746	2.53572	2.49055	2.43448	2.37757	2.3092	2.23478	2.15093	2.07059	1.97753	1.87682	1.78158	1.67535	1.5638	1.45246	1.33821	1.21841	1.1942	1.17072	1.15183	1.13118	1.11398	1.09686	1.08111	1.06342	1.04731	1.03203	1.01566	1.00164	0.985522	0.971212	0.954551	0.939105	0.924076	0.909859	0.89514	0.878731	0.863107	0.847088	0.830821	0.816634	0.799973	0.781608	0.764672	0.749315
0.407018	2.65328	2.64588	0.0526392	2.60782	2.57576	0.0507346	2.49226	2.43692	0.0475449	2.31211	2.23633	2.15586	2.06855	1.97686	1.87901	1.78428	0.0335282	1.56639	1.45362	1.33712	1.21872	1.19362	1.17179	1.15197	1.13211	1.11543	1.09651	1.08012	1.06335	1.0483	1.03176	1.01565	1.00081	0.985763	0.969148	0.955578	0.940182	0.924256	0.909094	0.894514	0.878795	0.862338	0.847005	0.831262	0.815904	0.799836	0.78152	0.765141	0.749168
0.407925	2.65569	2.64893	2.63272	0.0522168	2.5794	2.5385	2.49595	2.43783	2.38109	2.31441	2.23758	2.15741	2.06876	1.97822	1.88479	1.78261	1.68109	1.56745	1.45302	1.33522	1.21742	1.19456	1.17209	1.15189	1.13098	1.11573	1.09824	1.07918	1.06332	1.04728	1.03354	1.01594	1.0007	0.984341	0.969971	0.955521	0.938968	0.924889	0.909517	0.893743	0.878893	0.862958	0.847824	0.829894	0.814829	0.799215	0.782751	0.763859	0.748493
0.408828	2.65723	2.65046	2.63438	2.61321	2.58095	2.54179	2.49623	2.44187	2.3825	2.31753	2.23985	2.15779	2.07185	1.98037	1.88462	1.78245	1.67955	1.5673	1.45603	1.33773	1.21812	1.19398	1.17193	1.15191	1.13227	1.11427	1.09877	1.0812	1.06255	1.04897	1.03206	1.01496	1.00019	0.986092	0.969619	0.955245	0.939192	0.925071	0.909193	0.893339	0.878121	0.863031	0.846312	0.831335	0.815456	0.797646	0.781803	0.765088	0.74836
0.409732	2.66025	2.65367	2.63754	2.61492	2.58289	2.54323	2.49898	2.44608	0.047668	0.0463366	2.24545	2.15743	2.07494	1.9824	1.88642	1.78336	1.67977	1.56803	1.45439	1.33755	1.21846	1.19334	1.17437	0.0230552	0.0226394	1.11592	1.09667	1.08119	1.0647	1.04675	1.032	1.01628	1.00138	0.985438	0.969054	0.955464	0.939404	0.923686	0.908247	0.893958	0.878852	0.862615	0.846139	0.83052	0.81413	0.797868	0.781407	0.765177	0.748629
0.410648	2.66305	2.65571	2.6391	2.61524	2.58351	2.54887	2.49879	2.44844	2.38393	2.31886	0.0449061	2.15934	2.07625	1.98497	1.88699	1.78618	1.6813	1.56744	1.45664	1.33764	1.2189	1.19427	1.17143	1.15277	1.13252	1.1149	1.0989	1.0812	1.06446	1.04865	1.03125	1.01549	1.00007	0.985789	0.969978	0.954774	0.939136	0.923251	0.908058	0.894945	0.878225	0.862891	0.846531	0.828493	0.813413	0.79828	0.781758	0.015297	0.74837
0.411562	2.66479	2.65724	2.64174	2.61674	2.58792	2.54859	2.50176	2.44834	2.389	2.31809	2.24451	2.16275	2.07799	0.0397189	1.88986	1.78827	1.68111	1.56811	1.45345	1.3412	1.21852	1.19245	1.17252	1.15117	1.1344	1.11546	1.09847	1.08244	1.06551	1.04781	1.03185	1.01629	0.999919	0.984479	0.970378	0.95466	0.93768	0.924409	0.90895	0.893544	0.877984	0.0172384	0.845994	0.82912	0.813877	0.797903	0.780713	0.764337	0.74786
0.41245	2.6668	2.65991	2.64206	2.62053	0.0258792	0.0510188	2.5021	2.44937	2.3883	2.32083	2.24611	2.165	2.07962	1.98892	1.8861	1.7927	1.67834	1.56841	1.46136	1.3369	1.21881	1.19428	1.17147	1.15286	1.13368	1.11588	1.09823	1.08163	1.06598	1.0472	0.0206452	1.01663	0.999747	0.984137	0.9698	0.954998	0.93932	0.0184654	0.908978	0.892544	0.877963	0.860947	0.846409	0.0165896	0.813327	0.797533	0.780997	0.762709	0.747666
0.413369	2.66832	2.66136	2.64427	2.62205	2.59012	2.55199	0.0500995	2.45269	2.38909	2.32294	2.24711	2.16548	2.07993	1.98996	1.89193	1.78832	1.68165	1.56906	1.45604	1.33778	1.21946	1.19352	1.17116	1.15359	1.13426	1.11586	1.0994	1.0812	1.06415	1.04849	1.03175	1.01638	0.999787	0.984942	0.96938	0.955359	0.939805	0.923089	0.908545	0.892498	0.876588	0.861776	0.845861	0.829307	0.813413	0.797383	0.779996	0.76328	0.746306
0.414285	2.67103	2.66327	2.64834	2.62379	2.59166	2.55438	2.50826	0.0490237	2.39107	2.3219	2.25096	2.16803	2.08109	1.98754	1.89118	1.78987	1.6818	1.56935	1.45871	1.34061	1.21918	1.19221	1.17269	1.15447	1.13321	1.11608	1.09922	1.08152	1.06434	1.04918	0.0206219	1.01766	1.00085	0.982371	0.97085	0.95407	0.938323	0.922685	0.908706	0.89155	0.877282	0.8615	0.845193	0.830644	0.812781	0.796321	0.781004	0.763815	0.745248
0.415183	2.67236	2.66515	2.64898	2.62618	2.59617	0.0510961	2.50719	2.45406	2.39209	2.32576	2.2497	2.1678	2.08218	1.98928	1.88947	1.79047	1.68286	1.5729	1.45716	1.34361	1.21869	1.19456	1.17149	1.15221	1.13588	1.11712	1.09729	1.08236	1.06491	1.04951	1.03202	1.01734	1.00035	0.984016	0.9696	0.954308	0.938585	0.923651	0.907311	0.892503	0.876262	0.860349	0.845575	0.829169	0.813163	0.796692	0.778981	0.764159	0.745891
0.416068	2.67489	2.6654	2.65072	2.62915	2.59666	2.55674	2.51113	2.45416	2.39585	2.32493	2.25118	2.16952	2.08358	1.99036	1.88947	1.7905	1.68405	1.57269	1.4607	1.34508	1.21851	1.19469	1.17189	1.15277	0.0227342	0.0223252	1.09906	1.08205	1.06616	1.04726	1.03316	1.01715	1.00038	0.984828	0.968679	0.953472	0.938902	0.924654	0.90731	0.891642	0.876262	0.861742	0.844766	0.828671	0.811883	0.795512	0.780369	0.763169	0.745637
0.41697	2.67755	2.66939	2.65422	2.63043	0.0519839	2.55794	2.51026	2.45847	2.39634	2.32687	0.0450648	2.17137	2.08245	1.99018	1.8958	1.79024	1.68433	1.57597	1.46087	1.34041	1.21919	1.19275	1.17232	1.15367	1.13524	1.11722	1.09879	1.08348	1.06425	1.04794	1.03287	1.01802	1.00004	0.98554	0.969474	0.952796	0.938177	0.923001	0.90832	0.0178463	0.875907	0.86008	0.845298	0.82759	0.813922	0.795653	0.779503	0.761621	0.744919
0.417857	2.67887	2.66991	2.65626	2.63208	2.59905	2.55952	2.51323	2.45825	2.39903	2.33075	2.25155	2.17139	2.08647	1.99318	1.89617	1.79375	1.68591	1.57241	1.46232	1.34037	1.21855	1.19337	1.17344	1.15311	1.13482	1.11841	1.10006	1.08105	1.06427	1.04879	1.03261	1.01756	1.0014	0.983654	0.971667	0.952401	0.937584	0.923271	0.907887	0.891633	0.876147	0.860591	0.844744	0.829448	0.811627	0.793954	0.779392	0.761645	0.745827
0.418767	2.68022	2.67278	2.65716	2.63113	2.60209	2.56035	2.51489	2.45912	2.3975	2.33219	2.25562	2.17237	2.08663	1.99524	1.89756	1.79716	1.68444	1.57561	1.45764	1.34397	1.21898	1.19498	1.17319	0.0230722	1.13472	1.11768	1.10038	0.0216036	1.06598	1.04933	1.03295	1.01602	1.00084	0.985694	0.970126	0.953115	0.938031	0.922449	0.907797	0.891075	0.876781	0.858735	0.845291	0.829057	0.811906	0.795451	0.77878	0.761267	0.743569
0.419682	2.68313	2.67538	2.65768	2.63408	0.0520289	2.56198	2.51652	2.46104	2.40173	2.33424	2.25559	2.17583	2.08809	1.99514	1.89969	1.79636	1.68346	1.57433	1.46108	1.34366	1.21887	1.19397	1.17334	1.15357	1.13416	1.11862	1.09983	1.08315	1.06647	1.04903	1.03249	1.01753	0.999566	0.985534	0.968331	0.954437	0.938501	0.922585	0.906446	0.891067	0.876948	0.859223	0.844276	0.829039	0.81148	0.793422	0.780204	0.761127	0.744044
0.420594	2.68671	2.6773	2.66007	2.63833	2.60382	2.5661	2.51939	2.46138	2.3989	2.33549	2.25897	2.17644	2.08913	1.99684	1.89912	1.7954	1.68822	0.0315033	1.46269	1.34005	1.21908	1.19395	1.17629	1.15351	1.13371	1.11783	1.10122	1.08311	1.06525	1.04828	1.03266	1.01779	1.00193	0.984385	0.969238	0.953629	0.938511	0.922413	0.906968	0.891102	0.876065	0.860038	0.842315	0.827564	0.811954	0.795581	0.778152	0.760665	0.743273
0.421508	2.68787	2.67992	2.66193	2.63947	2.60836	2.56638	2.51915	2.46574	2.40194	2.33608	2.25738	2.17888	2.08887	1.9991	1.898	1.79653	1.68695	1.57696	1.46035	1.34244	1.2191	1.19423	1.17467	1.15319	1.13659	1.11683	1.10145	1.08357	1.06515	1.04941	1.03245	1.01667	1.00005	0.98619	0.969567	0.953334	0.938006	0.921673	0.906752	0.892118	0.875817	0.859383	0.843303	0.826864	0.812286	0.794366	0.0155441	0.760422	0.743166
0.422438	2.68889	2.68176	2.66599	2.63969	2.61017	2.56606	2.52143	2.46744	2.40521	2.33543	2.26248	2.17726	2.09375	1.99698	1.89982	1.79625	1.68768	1.57829	1.46064	1.34327	1.22032	1.1951	1.17225	0.0231172	1.13528	1.11844	1.10053	1.08225	1.06687	1.05024	1.0317	1.01591	1.00039	0.985231	0.969835	0.954179	0.938383	0.920931	0.906995	0.891539	0.875332	0.858895	0.84354	0.827803	0.809497	0.79453	0.776414	0.761982	0.742741
0.423352	2.69038	2.68324	2.66672	2.64162	2.61021	2.57004	2.52604	2.46882	2.40531	2.33836	2.2629	2.17872	2.09173	1.99873	1.89858	1.80124	1.68837	1.57538	1.46181	1.34496	1.21995	1.1955	1.17351	1.15435	1.13769	1.11785	1.10014	1.08257	1.06657	1.0482	1.03294	1.0174	1.00025	0.985081	0.968772	0.953995	0.93716	0.923697	0.906429	0.890691	0.875251	0.858699	0.842733	0.826718	0.812192	0.792478	0.776749	0.76051	0.744394
0.424244	2.69116	2.68439	2.66883	2.6442	2.61067	2.57209	2.52497	2.46962	2.40953	2.33937	2.26203	2.18243	2.09123	1.99992	1.90141	1.79715	1.68986	1.57668	1.4638	1.34353	1.22149	1.19498	1.17464	1.1541	1.13712	1.11745	1.10029	1.08292	1.06657	1.04866	1.03238	1.01645	1.00096	0.98555	0.969296	0.953818	0.937248	0.921925	0.906492	0.891774	0.874467	0.859103	0.842338	0.827199	0.809423	0.792836	0.777606	0.760063	0.743109
0.42516	2.69641	2.68573	2.6698	2.64624	0.0522778	2.57449	2.52776	2.47117	2.40603	2.3408	0.0452999	2.18228	2.09569	2.00246	1.89959	1.79987	1.68952	1.57633	1.46445	1.34264	1.22201	1.19587	1.17457	1.15476	1.13579	1.11921	1.10155	1.08187	1.06656	1.04845	1.03367	1.01807	1.00027	0.0196988	0.969267	0.952082	0.937677	0.922475	0.90551	0.890491	0.874861	0.857666	0.843026	0.826656	0.810289	0.793181	0.776204	0.75926	0.743719
0.426072	2.69711	2.68775	0.0534548	2.64783	2.61554	2.57695	2.52882	0.0494233	2.40969	2.34234	2.26128	2.18534	2.09771	1.99994	1.90203	1.80027	1.69252	1.5779	1.4625	1.34589	1.22157	1.19667	0.0234816	1.15594	1.13584	0.0223616	1.10166	1.08258	1.06557	1.04983	1.03315	1.01744	1.00242	0.98301	0.969833	0.952892	0.936667	0.921629	0.018116	0.89043	0.87364	0.858182	0.842828	0.826108	0.810305	0.792596	0.777302	0.75974	0.74163
0.426994	2.69873	2.69087	0.0535208	2.65067	2.61656	2.57684	2.53086	2.47464	2.41145	2.34111	2.26704	2.18268	2.09597	2.00244	1.90503	1.7988	0.0338337	1.57938	1.46503	1.34105	1.2223	1.19736	1.17432	1.15612	1.13606	1.11915	1.1	1.08229	1.06673	1.04823	1.03474	1.01707	1.0012	0.985052	0.969184	0.952287	0.936966	0.921058	0.904952	0.890261	0.874437	0.859372	0.842356	0.826355	0.80931	0.791979	0.77719	0.758563	0.743594
0.427925	2.70021	2.69291	2.67504	2.65471	2.61862	2.57925	2.53497	2.4748	2.4119	2.34185	2.26615	2.18525	2.09934	2.00402	1.90432	1.80089	1.69249	1.57998	1.46374	0.0269169	1.22201	1.19624	1.17515	1.1553	1.1381	1.11812	1.10078	1.08191	0.0106641	1.04897	1.03246	1.01773	1.00182	0.98542	0.969429	0.95233	0.936375	0.920906	0.905772	0.890068	0.873867	0.859524	0.841939	0.825745	0.810118	0.790826	0.776428	0.759959	0.740626
0.428846	2.70157	0.0538667	0.0535932	2.65336	2.6235	2.58128	2.53211	2.47781	2.41522	2.34472	2.2688	2.18648	2.09995	2.00337	1.90724	1.80085	1.69262	1.58084	1.46158	1.34424	1.22253	1.1965	1.17621	1.15607	1.13726	1.1179	1.10187	1.08192	1.0667	1.04927	1.03249	1.0164	1.00137	0.984627	0.970033	0.952739	0.937179	0.920083	0.906637	0.889668	0.874021	0.0171525	0.841514	0.826883	0.809799	0.792061	0.775601	0.758644	0.740656
0.429784	2.70449	2.69478	2.68042	0.0530887	2.62595	2.58304	2.5357	2.47876	2.41669	2.34622	2.26901	2.19191	2.09966	2.00652	1.90784	1.80099	1.69048	1.58224	1.46544	1.34401	1.22261	1.19624	1.17626	0.0231347	1.13787	1.1185	1.10034	1.08331	1.06615	1.0498	1.03238	1.01695	1.00045	0.986536	0.969032	0.952854	0.936574	0.920452	0.905619	0.889761	0.873756	0.858151	0.841572	0.824726	0.0162085	0.792299	0.77484	0.758578	0.740474
0.430668	2.70693	2.69816	2.68104	2.65839	2.62568	2.58616	2.53666	2.48112	2.41843	2.34871	2.27267	2.19176	2.09875	2.01109	1.90637	1.80393	1.69239	1.5816	1.46432	1.3456	1.22262	0.0239135	1.17646	1.15653	1.13839	1.11866	1.10067	1.08304	1.066	1.04995	1.03405	1.01576	1.00042	0.98477	0.969184	0.953857	0.936715	0.920037	0.903999	0.889514	0.874737	0.858306	0.839399	0.825524	0.809689	0.792984	0.774699	0.758199	0.741541
0.431583	2.7094	2.7006	2.68439	2.65849	2.62711	2.5883	2.53854	2.4809	2.41907	2.35125	2.27331	2.19327	2.10417	2.00799	1.90823	1.8056	1.69234	1.58172	1.46379	1.34495	1.22296	1.19784	1.17504	1.15809	1.13735	1.1188	1.1011	1.08363	1.06572	1.04993	1.03355	1.01695	1.00013	0.0196969	0.969878	0.951949	0.936324	0.921915	0.904738	0.888279	0.87454	0.855732	0.842086	0.824401	0.808593	0.793488	0.775839	0.755873	0.740366
0.432479	2.71114	2.70224	2.68632	2.65916	2.62966	2.58778	2.54088	2.48426	2.42211	2.34721	2.27787	2.19224	2.10563	2.01046	1.90854	1.80564	1.69292	1.57984	1.46563	1.34634	1.22386	1.1974	1.17696	1.15673	1.13634	1.11971	1.10146	1.08318	1.06682	1.04929	1.0328	1.01802	1.00035	0.98558	0.968402	0.951969	0.937058	0.920985	0.905257	0.888378	0.873045	0.856907	0.841906	0.824326	0.809371	0.791798	0.773893	0.757097	0.740681
0.433407	2.71095	2.70207	2.6886	2.66275	2.62945	2.58963	2.54219	2.48609	2.42114	2.35408	2.27594	2.19745	2.10364	2.01095	1.90949	1.80564	1.69529	1.58336	1.46413	1.34502	1.22313	1.19893	1.17684	1.1568	1.13785	0.0223826	1.10027	1.08447	1.06617	1.05052	1.03284	1.01809	1.00131	0.984987	0.967639	0.951432	0.0187619	0.919613	0.904655	0.889162	0.873233	0.857494	0.840281	0.824343	0.80798	0.7919	0.774489	0.758131	0.741034
0.434332	2.71226	2.70301	2.68826	2.66477	2.63272	2.59102	2.54197	2.48783	2.42455	2.356	2.27884	2.19631	2.10725	0.0402101	1.91014	1.80727	1.6943	1.58533	1.46378	1.34538	1.22416	1.19846	1.17761	1.15634	1.1381	1.11958	1.1	1.08421	1.06718	1.04919	1.03292	1.01826	1.00095	0.985296	0.968556	0.952373	0.935909	0.9202	0.904621	0.888843	0.87274	0.856944	0.840894	0.824052	0.808292	0.790501	0.774273	0.757159	0.73991
0.435225	2.7142	2.70511	2.69024	2.66725	2.63542	2.59406	2.54213	2.49031	2.42679	2.35522	2.27804	2.19494	2.10797	2.01309	1.91469	1.80428	1.69788	1.58191	1.46571	1.34729	1.2243	1.1998	1.17674	1.15742	1.13858	1.11846	1.1028	1.08383	1.06616	1.04886	1.03426	1.01856	0.999928	0.98504	0.969154	0.953781	0.934404	0.9202	0.905989	0.888268	0.872929	0.855667	0.840387	0.823244	0.809602	0.790082	0.773483	0.756134	0.740948
0.436133	2.71577	2.70814	2.69361	2.66791	2.6364	2.5958	2.54602	2.48991	2.42714	2.35978	2.27942	2.19376	2.10931	2.01064	1.91392	1.8077	1.69745	1.58346	1.46563	1.34627	1.22482	1.20107	1.17792	1.15667	1.13972	1.11979	1.10149	1.08354	1.06687	1.04996	1.03369	1.01814	1.00063	0.984688	0.96845	0.952488	0.936614	0.919883	0.904276	0.890158	0.0174415	0.856094	0.840175	0.823091	0.806869	0.792018	0.773558	0.755877	0.739517
0.43706	2.71826	2.71062	2.69501	2.67127	0.0527563	2.59494	2.54798	2.49265	2.42609	2.35863	2.28108	2.19624	2.10945	2.01246	1.91259	1.80913	1.69748	1.58575	1.4676	1.34838	1.22421	1.19868	1.1789	1.15751	1.13819	1.12048	1.10191	1.08436	1.06698	1.05078	1.03235	1.01756	1.00151	0.984467	0.968876	0.952254	0.935953	0.921021	0.90418	0.888727	0.87188	0.85642	0.838958	0.824391	0.807119	0.790327	0.774727	0.755353	0.739507
0.437982	2.72048	2.71339	2.69759	2.67302	2.63695	2.59603	2.55185	2.49072	2.43145	2.35991	2.28099	2.19616	2.1089	2.01585	1.91174	1.80766	1.70072	1.5876	1.46618	1.34818	1.22542	1.19943	1.17704	1.15652	1.14008	1.1217	1.10113	1.08541	1.06672	1.0503	0.0206438	1.01693	1.00126	0.985493	0.968217	0.952996	0.935682	0.919838	0.904772	0.889171	0.871263	0.856775	0.838664	0.823489	0.805477	0.791657	0.77519	0.755407	0.737896
0.438904	2.72185	2.71487	2.69936	2.67453	2.63948	2.59812	2.55018	2.49446	2.43003	2.3626	2.28311	2.19704	2.10999	2.0172	1.91453	1.80714	1.70227	1.58617	1.46665	1.34933	1.2264	1.19806	1.17802	1.15813	1.1387	1.12136	1.10112	1.0847	1.06872	1.04911	1.03374	1.01714	0.999133	0.98529	0.968722	0.951656	0.936326	0.920823	0.904531	0.889078	0.87029	0.856181	0.839799	0.823449	0.807254	0.790729	0.772141	0.755735	0.738146
0.439827	2.72388	2.71633	2.70102	2.67639	2.64328	0.0519915	2.55187	2.49383	2.43108	2.36223	2.28261	2.20103	2.11308	2.01412	1.91617	1.80984	1.69885	1.58765	1.47028	1.34725	1.22596	1.2003	1.17672	1.15646	1.14041	1.12073	1.10296	1.0851	1.06705	1.04989	1.03442	1.01611	1.00051	0.983965	0.968683	0.952445	0.936	0.920263	0.904124	0.886295	0.872582	0.855828	0.839636	0.822578	0.807126	0.789982	0.772611	0.755491	0.73703
0.44075	2.72632	2.71751	2.70337	2.67592	2.64396	2.60194	2.5533	2.49561	2.43113	2.36172	2.28371	2.20152	2.11192	2.0189	0.0383651	1.81118	1.70102	1.58729	1.46966	1.34831	1.22661	1.19931	1.17834	1.15951	1.13862	1.12113	1.102	1.08402	1.06802	1.05147	1.03298	1.01532	0.999304	0.986847	0.966642	0.951931	0.935925	0.92087	0.904107	0.886989	0.872526	0.855426	0.83935	0.822113	0.807594	0.7891	0.772946	0.753655	0.737622
0.441663	2.72756	2.72051	2.7037	2.68005	2.64422	2.60311	2.5561	2.49533	0.0243377	2.3619	2.2864	2.1984	2.11739	0.0403272	1.92009	1.81134	1.70233	1.586	1.46892	1.35041	1.2264	1.19991	1.17887	1.15782	1.13929	1.12103	1.1018	1.08431	1.06655	1.05138	1.0348	1.01575	0.999123	0.984739	0.968011	0.95154	0.935529	0.92132	0.903685	0.888014	0.870959	0.855357	0.839627	0.822652	0.805769	0.78911	0.771463	0.754652	0.736712
0.442574	2.72946	2.72229	2.70548	2.67916	2.64579	2.60557	2.55687	2.49946	2.434	2.3648	2.28669	2.20395	2.11452	2.01834	1.9187	1.81289	1.70212	1.59045	1.46915	1.35119	1.2266	1.20079	1.17767	1.15989	1.13931	1.12078	1.10204	1.08467	1.06686	1.05157	1.03496	1.01609	0.999838	0.983302	0.96795	0.950599	0.936006	0.91964	0.903819	0.888034	0.872548	0.855903	0.839496	0.821684	0.806003	0.786111	0.771716	0.754107	0.737509
0.443493	2.73217	2.725	2.70806	2.68015	2.64705	2.60621	2.55855	2.50111	2.43774	2.3663	2.28682	2.20219	2.11679	2.02157	1.91962	1.81042	1.70479	1.5876	1.4724	1.35151	1.22814	1.19904	1.17898	1.15848	1.14051	1.12104	0.0220487	1.08421	1.06722	1.05052	1.0342	1.01751	1.00014	0.983335	0.967649	0.951061	0.935909	0.918863	0.903836	0.888339	0.871238	0.856302	0.840558	0.820135	0.804838	0.788409	0.771075	0.753817	0.735854
0.444401	2.73459	2.72591	2.70851	2.68357	2.65109	2.60721	0.0512025	2.50204	2.43635	2.36802	2.29104	2.2075	0.0423493	2.02066	1.91736	1.81492	1.70479	1.58857	1.46911	0.0270944	1.2275	1.20175	1.18019	1.1581	1.14013	1.12155	1.10306	1.08374	1.06849	1.05084	1.0333	1.01643	1.00097	0.983219	0.967164	0.952545	0.934659	0.91916	0.903577	0.887361	0.872364	0.855631	0.838999	0.821178	0.803786	0.78822	0.771105	0.753155	0.737488
0.44529	2.73565	2.72683	2.70959	2.683	2.65139	2.61137	2.56078	2.50372	2.44054	2.36909	2.29227	2.20786	2.11576	2.01949	1.92115	1.81432	1.70359	1.5922	1.46912	1.35252	1.22859	1.2019	1.18045	1.15846	1.14027	1.12098	1.10381	1.08594	1.06729	1.0502	1.0322	1.01669	1.00007	0.983355	0.967988	0.950752	0.935821	0.918402	0.903542	0.887018	0.872201	0.85575	0.839578	0.82121	0.805193	0.786545	0.770188	0.752041	0.736174
0.446189	0.0547337	2.72818	2.71037	2.68655	2.65266	2.61275	2.56323	2.50767	2.44269	2.37102	2.29278	2.2099	2.11409	2.02355	1.92022	1.81487	1.70611	1.59179	1.47369	1.34819	1.22897	1.20261	1.17901	1.16065	1.13918	1.12156	1.10306	1.08606	1.06733	1.05132	1.0328	1.01612	0.999949	0.984318	0.966715	0.95071	0.935237	0.918899	0.903028	0.887613	0.871653	0.854616	0.838835	0.822837	0.804164	0.787614	0.769622	0.753551	0.73588
0.447085	2.73849	2.73021	2.71317	2.68762	2.65589	2.61567	2.56367	0.050146	2.44322	2.3746	2.29294	2.20882	2.11895	2.01914	1.92106	1.81787	1.70627	1.59184	1.47337	1.35133	1.22888	1.20137	1.17926	1.16215	1.14023	1.12135	1.10339	1.08574	1.0682	1.05113	1.03186	1.01664	0.999999	0.984597	0.966267	0.950828	0.936321	0.918502	0.903163	0.887029	0.871015	0.855017	0.838141	0.821543	0.80409	0.787888	0.770084	0.753094	0.735689
0.448013	2.73991	2.73269	2.71653	2.68975	2.65788	2.61794	2.56568	2.50898	2.4456	2.37066	2.29484	2.21121	2.12209	2.01963	1.92265	1.8161	1.70561	1.58762	1.4774	1.35238	1.22929	1.2027	1.18015	1.15976	1.14152	1.12111	1.10375	1.0842	1.06805	1.05105	1.03354	1.01641	1.00022	0.984922	0.967306	0.951267	0.934561	0.919721	0.903205	0.884735	0.871344	0.0170875	0.83726	0.821651	0.805457	0.787142	0.770874	0.752524	0.735241
0.44892	2.74231	2.73413	0.0543622	2.69442	2.65762	2.61709	2.56912	2.50693	2.44482	2.37548	2.29546	2.21135	2.12239	2.02309	1.92126	1.81557	0.0340576	1.59538	1.47176	1.3543	1.22952	1.20238	1.18079	1.16029	1.14147	1.12052	1.10495	1.0861	1.06682	1.04956	1.03409	1.01816	1.00024	0.983172	0.967999	0.950814	0.935252	0.918916	0.902937	0.88574	0.870111	0.853968	0.837366	0.820668	0.80398	0.788938	0.769227	0.752587	0.73489
0.449815	2.74297	2.73648	2.71885	2.69529	2.6595	0.0523184	2.568	2.51085	2.44738	2.37574	2.298	0.0442033	2.11929	2.02651	1.92075	1.81355	1.70649	1.59118	1.47801	1.35278	1.2295	1.20282	1.17997	1.16041	1.14183	1.12016	1.10416	1.08669	1.06829	1.04888	1.03504	1.0154	1.00107	0.984207	0.967029	0.951413	0.935907	0.917075	0.902477	0.886957	0.870981	0.853272	0.836696	0.820676	0.80273	0.788399	0.769294	0.752845	0.734832
0.450721	2.74609	2.73946	2.72194	2.69473	2.66087	2.61805	2.56938	2.51399	2.44623	2.37638	2.29825	2.21287	2.11891	2.02577	1.9205	1.81717	1.70689	1.59178	1.47957	1.35013	1.22931	1.20318	1.17954	1.16043	0.0228151	1.12177	1.10422	1.08612	1.06744	1.05036	1.03394	1.01586	0.999808	0.984597	0.96772	0.950657	0.935231	0.917427	0.903388	0.88576	0.869915	0.854877	0.836215	0.821302	0.80333	0.786025	0.770136	0.751246	0.734124
0.451654	2.74947	2.74101	2.72305	2.6973	2.66145	2.62156	2.57037	2.51477	2.44957	2.37808	2.29634	2.21315	2.12294	2.02531	1.92451	1.81681	1.70855	1.59629	1.4763	1.35275	1.22876	1.20188	1.18073	1.16115	1.1416	1.12171	1.1038	1.08589	1.06748	1.05117	1.034	1.01614	1.00036	0.983607	0.0193606	0.95166	0.934892	0.918204	0.901507	0.884979	0.869533	0.854361	0.836811	0.820682	0.802979	0.785824	0.769488	0.752123	0.733174
0.452566	2.75101	2.74301	2.725	2.69949	2.66315	2.62175	2.5751	2.51867	2.44889	2.37727	0.0459653	2.21386	2.12404	2.02783	0.03849	0.0363929	1.7104	1.59696	1.47404	1.35467	1.22942	1.20359	1.18106	1.16157	1.1407	1.12415	1.10329	1.08533	1.06849	1.05084	1.03461	1.01662	0.999497	0.982786	0.968864	0.950571	0.935536	0.918032	0.900624	0.884351	0.870587	0.853589	0.837366	0.819437	0.803392	0.786909	0.768399	0.750766	0.734232
0.453458	2.75296	2.74414	2.72608	0.0540022	2.66516	2.62298	2.57242	2.51627	2.45421	2.37862	2.30053	0.0442262	2.12384	2.02836	1.92679	1.82164	1.71144	1.59589	1.47529	1.36004	1.22857	1.20364	1.18131	1.16083	1.14195	1.12204	1.10376	1.08638	1.0679	1.05162	1.03333	1.0167	1.00041	0.983281	0.968737	0.949702	0.934441	0.917698	0.901596	0.884224	0.869443	0.852566	0.837529	0.819623	0.016045	0.786515	0.768631	0.751084	0.733736
0.454389	2.75539	2.74459	2.72778	2.70366	2.66831	2.62423	2.57576	2.5182	2.45159	2.38003	2.30065	2.2156	2.12408	2.02838	1.92796	1.82269	1.70946	1.59656	1.47904	1.35394	1.22944	1.2039	1.1802	1.16196	1.14192	1.12235	1.10465	1.08753	1.06718	1.04947	1.03353	1.01716	1.0024	0.982723	0.967168	0.0190035	0.935291	0.918267	0.900841	0.884462	0.869341	0.852394	0.835986	0.819723	0.803326	0.785608	0.766723	0.752109	0.734347
0.455297	2.75709	2.74712	2.72878	2.70538	0.053386	2.62662	2.57732	2.52072	2.4531	2.37961	2.3007	2.21896	2.1259	2.02593	1.92979	1.82501	1.71066	1.59705	1.47816	1.35258	1.22972	1.20331	1.18199	1.16001	1.14254	1.12307	1.10406	1.08647	1.06843	1.05079	1.03363	0.0203203	1.00162	0.983627	0.967572	0.949731	0.935395	0.916343	0.902146	0.885353	0.869975	0.852453	0.835643	0.819178	0.801062	0.785675	0.767029	0.75113	0.733551
0.456211	2.75956	2.74906	2.73002	0.0541089	2.67405	2.62791	2.57947	2.52496	2.45457	2.38163	2.30238	2.21858	2.12681	2.03053	1.9293	1.82763	1.71013	1.5931	1.47706	1.35472	1.23034	1.20529	1.1807	1.15903	1.14238	1.12476	1.10322	1.08586	1.06885	1.05143	1.03237	1.01844	1.0003	0.983607	0.967381	0.950235	0.933644	0.917933	0.902011	0.88603	0.868999	0.852459	0.835643	0.818672	0.801525	0.784725	0.767953	0.749051	0.733377
0.457114	2.75976	2.75159	2.73093	2.70677	2.67456	2.632	2.57956	2.52459	2.45793	2.38632	2.30029	0.0443744	2.12826	2.0319	1.92968	1.824	1.71257	1.59566	1.47838	1.35458	1.22974	1.20427	1.18088	1.16123	1.14345	1.12243	1.10457	1.0856	1.06978	1.05129	1.03367	1.0162	1.00023	0.982713	0.967943	0.949977	0.934399	0.917156	0.902236	0.885385	0.869354	0.851694	0.835774	0.818028	0.802733	0.784688	0.767781	0.749522	0.73266
0.458031	2.7616	2.75184	0.0273393	2.70867	2.67456	2.63264	2.58246	2.52581	2.45901	2.38761	2.3046	2.21944	2.12909	2.03294	1.93019	1.8247	1.71343	1.5937	1.4785	1.35629	1.22943	1.20443	1.18148	1.16191	1.14213	1.12267	1.10652	1.08624	1.06812	1.04964	1.03378	1.01634	1.00061	0.982631	0.968124	0.950453	0.934198	0.917318	0.901416	0.885441	0.868116	0.852133	0.835105	0.819326	0.802699	0.783029	0.767103	0.750242	0.732721
0.458937	2.76338	2.75444	2.73479	2.71174	2.6756	2.63395	2.5871	2.52637	2.46013	2.38744	0.0461063	2.22371	2.13084	2.03381	1.93003	1.82345	1.71285	1.59445	1.47988	1.35624	1.22998	1.20487	1.18114	0.0232528	1.14257	1.12333	1.10504	1.08565	1.06787	1.05037	1.03401	1.01644	1.00129	0.9848	0.966577	0.949592	0.934422	0.918665	0.900204	0.885987	0.867363	0.852666	0.834255	0.819439	0.800185	0.784843	0.766352	0.751073	0.731008
0.459832	2.76455	2.75549	2.73699	2.71167	2.67621	2.63519	2.58749	2.52568	2.4603	2.38955	2.30947	2.2215	2.1299	2.0371	1.93011	1.82751	1.71133	1.59613	1.47875	1.35543	1.22999	1.20456	1.18104	1.16277	1.14328	1.12234	1.10492	1.08625	1.0687	1.05	1.0342	1.01691	1.00064	0.984719	0.967553	0.948255	0.934892	0.917805	0.900402	0.885342	0.868574	0.851127	0.835064	0.818048	0.801194	0.783058	0.769496	0.748885	0.731986
0.460732	2.76633	2.75766	2.7397	2.71293	2.67949	2.63646	2.5872	2.52645	2.46192	2.38813	2.30978	2.22059	2.13384	2.0353	1.93142	1.82858	1.71205	1.59811	1.47708	0.0271517	1.22966	1.20474	1.18261	1.16103	1.14312	1.12219	1.10493	1.08688	1.0676	1.05093	1.03473	1.01729	1.00082	0.983739	0.966748	0.950244	0.933459	0.916976	0.901093	0.884418	0.868287	0.852403	0.834411	0.816372	0.801802	0.784761	0.766724	0.749338	0.731145
0.461654	2.76795	2.75965	2.74139	2.71514	2.68155	2.63856	2.59015	2.52764	2.46356	2.38766	2.30926	2.22251	2.13499	2.03579	1.93281	1.82489	1.71412	1.59702	1.47815	1.35575	1.2301	1.20521	1.18168	1.16047	1.14288	1.12502	1.10532	1.08517	1.06859	1.05112	1.0339	1.01594	1.00126	0.984711	0.966904	0.949498	0.934105	0.917427	0.900777	0.884162	0.869062	0.851419	0.83344	0.816633	0.80121	0.783745	0.767297	0.749308	0.732242
0.46258	2.76966	2.76111	2.7415	2.71711	2.68104	2.63915	2.5896	2.53219	2.46409	2.38882	2.31053	2.22532	2.13321	2.03652	1.93738	1.82474	1.71376	1.59769	1.47921	1.35869	1.23022	1.20465	1.18215	1.16273	1.14188	1.12366	1.10553	1.08588	1.06792	1.0527	1.03338	1.01632	0.999929	0.984772	0.966907	0.950581	0.933961	0.91777	0.901264	0.883765	0.867686	0.850819	0.833056	0.816815	0.800505	0.783928	0.0153369	0.748678	0.733349
0.463499	2.771	2.76221	0.0548574	2.71743	2.68472	2.64286	2.59191	2.53229	2.46344	2.39226	2.31058	2.22766	2.13609	2.03676	1.93638	1.82712	1.71344	1.59872	1.48063	0.0271274	1.22977	1.20513	1.18424	1.16064	1.14382	1.12451	1.10532	1.08636	1.06835	1.05023	1.03366	1.0179	1.00179	0.983278	0.967585	0.949734	0.0186953	0.916903	0.9006	0.884929	0.867418	0.849661	0.832648	0.817739	0.80001	0.78419	0.764935	0.749259	0.730771
0.464414	2.77235	2.76357	2.74556	2.71971	2.68553	2.64001	2.59162	2.5341	2.4661	2.39359	2.31535	2.22823	2.136	2.03969	1.93276	1.82687	1.71597	1.5998	1.47764	1.35921	1.23093	1.20442	1.1843	1.16207	1.14314	1.12435	1.10395	0.0217304	1.06897	1.05226	1.03429	1.01597	1.00229	0.983485	0.967776	0.950016	0.934114	0.916579	0.900829	0.885095	0.866336	0.850257	0.832681	0.816081	0.799882	0.783639	0.766299	0.747626	0.729787
0.465313	2.77429	2.76524	2.74775	2.72124	2.68474	2.64323	2.59248	2.53485	2.4674	2.39379	2.3168	2.22789	2.14148	2.03782	1.93335	1.82921	1.71414	1.59893	1.48399	1.35643	1.23104	1.20444	1.18437	1.16265	1.14363	1.12426	1.10508	1.08508	1.06958	1.05167	1.03512	1.01732	0.999466	0.983849	0.967062	0.951167	0.93363	0.917129	0.901632	0.883114	0.866035	0.850332	0.832999	0.815828	0.800946	0.782842	0.765354	0.748192	0.729968
0.466214	2.776	2.76526	2.75018	2.72228	2.68688	2.64667	2.59222	2.53591	2.47093	2.39464	2.31451	2.232	2.14231	2.03781	1.93547	1.82542	1.71758	1.59989	0.0296231	1.35736	1.23051	1.20592	1.18468	1.16128	1.14163	1.12499	1.10544	1.08626	1.06886	1.05185	1.03403	1.01764	0.999688	0.983766	0.966551	0.951125	0.935068	0.91601	0.900662	0.884331	0.866292	0.850199	0.831922	0.816303	0.800591	0.782408	0.766284	0.746492	0.730922
0.467117	2.77834	0.0553247	2.75163	2.72346	2.68853	2.64986	2.59582	2.53609	2.47282	2.39597	2.31769	2.23002	2.13817	2.04277	1.93526	1.82825	1.71892	1.60062	1.48098	1.35767	1.23059	1.20632	1.18325	1.16296	1.14278	1.1233	1.10527	1.08782	1.06795	1.05109	1.03404	1.01687	1.00162	0.984011	0.967437	0.951267	0.9331	0.916569	0.901355	0.882211	0.866789	0.851107	0.83322	0.815667	0.799142	0.781846	0.76454	0.747991	0.730146
0.468032	2.78011	2.77129	2.75111	2.72492	2.6929	2.64987	2.59847	2.53772	2.47311	2.39815	2.3186	2.23233	2.13698	2.04449	0.0387028	1.83099	1.71693	1.60284	1.48099	1.35725	1.23062	1.20703	1.18498	1.16326	1.14212	1.12315	1.10657	1.08786	1.06896	1.05059	1.03314	1.01762	1.00068	0.98443	0.966393	0.949722	0.93354	0.918275	0.900212	0.883279	0.867137	0.850683	0.832411	0.81494	0.798783	0.781943	0.764383	0.747952	0.728728
0.468954	2.78307	2.77262	2.75293	2.7288	0.0538681	2.65113	2.6015	2.5397	2.47526	2.40139	2.32097	2.23249	2.13992	2.04178	1.93705	1.83292	1.71763	1.60417	1.4807	1.35669	1.23083	1.20603	1.18226	1.16505	0.0228847	1.12349	1.10651	1.0863	1.06886	1.0508	1.03356	1.01852	0.999909	0.983938	0.966875	0.951951	0.933089	0.916308	0.901426	0.883039	0.866815	0.84916	0.832869	0.816619	0.797922	0.781868	0.764549	0.746113	0.730304
0.46987	2.78346	2.77314	2.757	2.72969	2.69742	2.65363	2.59993	2.54109	2.47742	2.40161	2.32284	2.23336	2.14136	2.04248	1.93812	1.83206	1.72077	1.602	1.48307	1.35866	1.23146	1.20509	1.18421	1.16392	1.14345	1.12419	1.10462	1.08793	1.06889	1.0509	1.03487	1.01765	1.00052	0.984192	0.967243	0.950496	0.934561	0.915405	0.901319	0.882826	0.866258	0.0169565	0.833685	0.814112	0.800645	0.78133	0.763588	0.746774	0.728101
0.470771	2.78464	2.77497	2.75661	2.73195	2.697	2.65242	2.60231	2.54544	0.0495566	2.40522	2.32536	2.23454	2.14153	2.04167	1.94202	1.83303	1.71813	0.032061	1.48408	1.35966	1.2325	1.20581	1.18261	1.16283	1.14458	1.12503	1.10519	1.08774	1.06924	1.0518	1.03439	1.0177	0.999406	0.984591	0.967986	0.950001	0.933739	0.917075	0.899448	0.883184	0.863684	0.849052	0.833212	0.815836	0.798226	0.782676	0.764325	0.74505	0.728381
0.471726	2.78547	2.77783	2.75755	2.7334	2.69492	2.65575	2.60628	2.5456	2.47986	2.40675	2.32387	2.23518	2.14528	2.04656	1.94281	1.83231	1.72008	0.0320677	1.4836	1.36094	1.23155	1.20526	1.1843	1.16325	1.143	1.12682	1.10592	1.0883	1.06908	1.05079	1.03475	1.01839	0.999959	0.985101	0.96694	0.950131	0.932936	0.917418	0.899663	0.882214	0.863995	0.849373	0.832379	0.815775	0.797463	0.78187	0.764238	0.745794	0.7266
0.472637	2.78551	2.7773	2.76143	2.73512	2.69734	2.65628	2.60686	2.54775	2.47977	2.40578	2.32672	2.23832	2.14642	2.04567	1.94102	1.83345	1.72217	1.60544	1.48493	1.35676	1.23278	1.20408	1.18608	1.16345	1.14309	1.12489	1.10596	1.0888	1.06913	1.05152	1.03436	1.01761	1.00249	0.981719	0.967656	0.950658	0.933017	0.917653	0.899413	0.880115	0.86493	0.84956	0.83229	0.816669	0.797942	0.781697	0.762375	0.745515	0.727143
0.473558	2.78879	2.77884	2.76204	2.73395	2.70004	2.65719	2.6077	2.549	2.48326	2.40366	2.3274	2.24134	2.14532	2.04714	1.94359	1.8358	1.72198	1.60431	1.48488	1.35877	1.23296	1.20654	1.1836	1.16452	1.1441	1.12576	1.10575	1.08744	1.06802	1.05134	1.03599	1.01814	1.0002	0.982897	0.96736	0.951414	0.932375	0.915513	0.899044	0.881892	0.866716	0.848217	0.83322	0.815928	0.798214	0.780545	0.762329	0.744918	0.726779
0.474451	2.78906	2.77989	2.76244	2.73514	2.70205	2.65916	2.60783	2.55012	2.48356	2.4081	2.33244	2.238	2.14602	2.05007	1.94268	1.83943	1.72192	1.60398	1.48242	1.35979	1.23276	1.20672	1.18493	1.16422	1.14516	1.12439	1.10477	1.08811	1.06847	1.05297	0.0207177	1.01804	0.999012	0.983607	0.966884	0.950487	0.931991	0.917029	0.898179	0.882502	0.86622	0.848944	0.832184	0.81592	0.797389	0.780327	0.762777	0.744939	0.727509
0.475374	2.79014	2.78324	2.76515	2.73695	2.70263	2.66133	2.60969	2.55116	2.48539	2.41237	2.33015	2.24305	2.14738	2.04611	1.94779	1.8379	1.72235	1.60215	1.48485	1.35866	1.23352	1.2059	1.18483	1.16574	1.14413	1.12606	1.10469	0.021761	1.06812	1.05356	1.0339	1.01795	0.999999	0.983727	0.967198	0.949973	0.93335	0.914908	0.899414	0.88145	0.865309	0.849568	0.830936	0.814368	0.798347	0.780492	0.763015	0.746259	0.726784
0.47629	2.79266	2.78403	2.76744	2.73993	2.704	2.6627	2.61233	2.55172	2.48743	2.4127	2.33268	2.24439	2.15035	0.040956	1.94651	1.83262	1.72227	1.60557	1.48303	1.36131	1.23301	1.20609	1.18569	1.16454	1.14588	1.12535	1.10522	1.08874	1.06887	1.05147	1.03529	1.0178	0.999859	0.983875	0.966155	0.949611	0.9343	0.91573	0.898946	0.881814	0.866147	0.847668	0.831229	0.814297	0.797093	0.780785	0.763589	0.744435	0.72711
0.477176	2.79443	2.78628	2.76824	2.74114	2.7062	2.6632	2.61201	2.55103	2.48919	2.41578	2.33473	2.24702	2.15096	2.04716	1.94698	1.83443	0.0344738	1.60446	1.48401	1.36292	1.23317	1.20763	1.18468	1.16525	1.14515	1.12692	1.10432	1.08751	1.06966	1.05191	1.03603	1.01713	1.0006	0.983603	0.967162	0.949027	0.932797	0.91609	0.899289	0.881447	0.864431	0.848167	0.830748	0.814988	0.798239	0.779402	0.762152	0.744073	0.725939
0.47808	2.79643	2.78695	2.77021	2.74315	0.0541317	2.66447	2.61378	2.55322	2.48727	2.41574	2.33286	2.2517	2.15096	0.0409755	1.94615	0.0367019	1.7241	1.6066	1.48547	1.36269	1.23352	1.20583	1.18607	0.0232748	1.14591	1.12552	1.10606	1.0865	1.07089	1.05241	1.03502	1.0173	1.00159	0.982723	0.966135	0.949769	0.931376	0.915847	0.898186	0.882481	0.864993	0.848478	0.830112	0.814759	0.797269	0.778505	0.762153	0.744989	0.726352
0.479021	2.79622	2.78876	2.77124	2.74476	2.70799	2.66708	2.616	2.5544	2.48987	0.0483492	2.3383	2.24869	2.14948	2.04947	1.9475	1.83721	1.72653	1.60709	1.48583	1.36084	1.23377	1.20796	1.18385	1.16532	1.14607	1.1252	1.10685	1.08714	1.06823	1.05296	1.03622	1.01695	1.00122	0.983517	0.965777	0.948671	0.00932723	0.916533	0.897898	0.881346	0.864363	0.848258	0.831074	0.814054	0.796211	0.780052	0.761915	0.744224	0.725266
0.479941	2.79864	2.79003	2.7719	2.74682	2.71106	2.667	2.61705	2.55581	2.49268	2.42162	2.33341	2.24667	2.15327	2.05215	1.9477	1.83803	1.72696	1.6063	1.48592	1.36299	1.23486	1.20928	1.18547	1.16623	1.14578	1.12568	1.10539	1.08838	1.06896	1.0533	1.03523	1.0178	1.0002	0.983135	0.965383	0.950421	0.932959	0.916686	0.897472	0.882374	0.862692	0.847939	0.82942	0.814394	0.797344	0.77935	0.76096	0.744199	0.725004
0.480846	2.79855	2.79013	2.774	2.74636	2.7121	2.6695	2.62026	2.56169	2.49197	2.41944	2.33617	2.2494	2.1509	2.05414	1.95019	1.84231	1.72649	1.6055	1.4836	1.36233	1.23532	1.20874	1.184	1.16751	1.14531	1.12505	1.10668	1.08645	1.07098	1.05182	1.03452	1.01804	1.00069	0.984707	0.966959	0.948388	0.932167	0.916324	0.89794	0.881885	0.864107	0.847406	0.829663	0.813516	0.796447	0.778258	0.76139	0.743927	0.725429
0.481784	2.79971	2.79178	2.77451	2.74782	2.71507	2.67057	2.62163	2.56261	2.49457	2.41809	2.33691	2.25067	2.15374	2.05405	1.95276	0.0367824	1.7267	1.60604	1.48499	1.36495	1.23645	1.20882	0.0237113	1.16549	1.14518	1.12597	1.10629	1.08763	1.07014	1.05196	1.03531	1.01706	1.00134	0.984928	0.966058	0.948857	0.931901	0.91443	0.89899	0.881414	0.865227	0.846964	0.829099	0.814083	0.795844	0.777048	0.760827	0.742521	0.725622
0.482695	2.80164	2.79279	2.77525	2.75153	2.71364	2.67193	2.6228	2.5616	2.49617	2.4202	2.33768	2.25148	2.15444	2.05603	1.95073	1.84212	1.72647	1.60935	1.48623	1.36176	1.23644	1.20713	1.1872	1.16556	1.14445	1.1241	1.10771	1.08879	1.07067	1.05017	1.037	1.01795	1.00058	0.98465	0.966748	0.947797	0.931267	0.915196	0.899024	0.881244	0.863024	0.84631	0.831802	0.813328	0.794858	0.777616	0.760564	0.742482	0.725451
0.483603	2.80397	2.79522	2.77775	2.75029	2.71729	2.67237	2.62242	2.56355	2.49636	2.42331	2.33738	2.25159	2.15606	2.05634	1.95409	1.84174	1.72752	1.60625	1.48851	1.36419	1.23487	1.20808	1.18778	1.16415	1.14509	1.12631	1.10785	1.08984	1.06941	1.05162	1.03684	1.01669	0.999173	0.984306	0.967056	0.947697	0.932417	0.915495	0.898135	0.879744	0.863426	0.848641	0.83048	0.812885	0.0158997	0.778446	0.761297	0.742163	0.723897
0.484499	2.80569	2.79853	2.77859	2.75279	2.71673	2.67422	2.62362	2.56494	2.49577	2.41883	0.0467983	2.25175	2.16116	2.05426	1.95043	1.8445	1.72752	1.61057	1.48763	1.36482	1.23605	1.20876	0.0237228	1.16598	1.14412	1.12716	1.10762	1.08896	1.07023	1.05213	1.03507	1.01807	0.999918	0.982552	0.965874	0.949132	0.932431	0.915964	0.897534	0.880252	0.863873	0.846761	0.830717	0.812895	0.0158879	0.015548	0.759918	0.743011	0.724914
0.485392	2.80602	2.79868	2.78114	2.75451	2.71824	2.67539	2.625	2.56518	2.49506	2.42465	2.34103	2.25224	2.15878	2.05791	1.95257	1.84266	1.72721	1.61246	1.48813	1.36589	1.2374	1.20814	1.18531	1.16634	1.14516	1.1255	1.10831	1.09005	1.07094	1.05338	1.03429	1.01726	0.998601	0.983946	0.96494	0.949298	0.931899	0.916514	0.897109	0.0176145	0.862846	0.84721	0.830276	0.812336	0.793841	0.776772	0.758957	0.743873	0.724693
0.486299	2.80837	2.79959	2.78254	2.75223	2.72036	2.67733	2.62889	2.56645	2.49785	2.42582	2.34424	2.25063	0.0432264	2.05789	1.95231	1.8423	1.72861	1.61175	1.49054	1.36219	1.23771	1.20951	1.18563	1.16552	1.14573	1.12687	1.10808	1.08868	1.07199	1.05254	1.03493	1.01772	0.999837	0.983458	0.964609	0.949236	0.932172	0.914637	0.897145	0.0176458	0.862973	0.84559	0.82875	0.812571	0.79399	0.776778	0.759814	0.741205	0.724658
0.487196	2.8102	2.80141	2.78174	2.75701	2.72253	2.67907	2.62694	2.56789	2.49933	2.42438	2.34298	2.25621	2.15991	2.05915	1.95398	0.0368969	1.72962	1.61369	1.48783	1.36374	1.23671	1.20936	1.18635	1.16658	1.14588	1.12759	1.10551	1.08958	1.07137	1.0527	1.03543	1.01711	1.00038	0.983203	0.966451	0.94878	0.931883	0.914051	0.897263	0.880563	0.864166	0.845435	0.829761	0.811867	0.794013	0.775673	0.760049	0.741083	0.724039
0.488113	2.81214	2.8015	2.78333	2.75788	2.7224	2.68049	2.6283	2.5661	2.50178	2.42369	2.34506	2.25803	2.16172	2.05811	1.95596	1.84608	1.73073	1.61139	1.49068	1.36509	1.237	1.20881	1.18768	1.16674	1.14671	1.12619	1.10751	1.08967	1.07125	1.05352	1.03355	1.01868	0.999477	0.982977	0.966836	0.948547	0.931031	0.91461	0.89755	0.880286	0.017247	0.8459	0.829369	0.812714	0.793718	0.775629	0.759509	0.741173	0.724273
0.489025	2.81272	2.80361	2.78587	2.75754	2.72553	2.68144	2.63019	2.56947	2.50088	2.42436	2.3462	2.26043	2.15821	2.06125	1.95803	1.84556	1.73081	1.61319	1.49323	1.36657	1.23654	1.20821	1.18788	1.16614	1.14847	1.12549	1.10796	1.08977	1.07134	1.05261	1.03548	1.01668	1.0004	0.984534	0.965234	0.946968	0.93232	0.914475	0.897732	0.879904	0.8625	0.846417	0.827812	0.812212	0.793838	0.776047	0.758988	0.741931	0.722801
0.489958	2.81284	2.80507	2.78755	2.75938	2.72473	2.68202	2.6308	2.57162	2.50276	2.42759	2.34675	2.26048	0.0432124	0.0411989	1.95699	1.84749	1.73264	1.61441	1.4917	1.36725	1.2377	1.20858	1.18816	1.16684	1.14651	1.12747	1.10787	1.0888	1.07117	1.05281	1.03542	0.0203672	0.999829	0.98265	0.96591	0.948875	0.93066	0.914673	0.896858	0.879753	0.862622	0.844878	0.828513	0.811281	0.793812	0.777234	0.758616	0.739343	0.724529
0.490851	2.81434	2.80685	2.79033	2.76163	2.72667	2.68112	2.632	2.57144	2.504	2.42973	2.34937	2.25795	2.15883	2.06266	1.957	1.84794	1.73155	1.61365	1.49147	1.3686	1.23834	1.20965	1.18781	1.16737	1.14532	1.12859	1.10809	1.08992	1.06924	1.05285	1.03585	1.01705	1.0002	0.982684	0.966072	0.94849	0.932225	0.914014	0.897081	0.879027	0.862276	0.844983	0.82787	0.811695	0.793062	0.777278	0.757867	0.739932	0.72417
0.491783	0.0563246	2.80767	2.7889	2.76533	2.72979	2.68197	2.63353	2.57431	2.50827	2.42965	2.34937	2.25687	2.16437	2.06126	1.95839	1.84661	1.732	1.61365	1.49351	1.36699	1.23745	1.20983	1.18711	1.16719	1.1478	1.12768	1.10875	1.08876	1.07035	1.05317	1.03557	1.01659	0.999476	0.982652	0.965612	0.948905	0.0186561	0.914032	0.895276	0.879615	0.861859	0.845669	0.828807	0.811104	0.792437	0.776644	0.757626	0.740133	0.72307
0.49272	2.81755	2.80963	2.79356	2.76452	2.73079	2.68561	2.63416	2.57489	2.50954	2.43093	2.35152	2.25621	2.16188	2.06384	1.96027	1.84879	1.73408	1.61389	1.49274	1.36466	1.23879	1.21179	1.18662	1.1654	1.14892	1.12612	1.10944	1.09001	0.0214134	1.05381	1.03411	1.01666	1.00001	0.981692	0.966975	0.948238	0.930302	0.914719	0.895861	0.878911	0.862619	0.845874	0.827976	0.810394	0.793556	0.775083	0.758979	0.740215	0.0144233
0.493613	2.81891	2.81227	2.79355	2.76764	0.0545959	2.68838	2.63532	2.57694	2.50784	2.43269	0.0470021	2.26217	2.16491	2.064	1.96005	1.85395	1.73216	1.6143	1.49294	1.36502	1.23899	1.21118	1.18779	1.16751	1.14789	1.12743	1.10799	1.09068	1.07062	1.05374	1.03514	1.01626	1.00021	0.982468	0.965061	0.948153	0.930743	0.91451	0.894931	0.879921	0.862194	0.845481	0.828921	0.810553	0.792683	0.775927	0.757463	0.740683	0.722058
0.494531	2.82125	2.812	2.79469	2.76887	2.73232	2.69015	2.63632	2.57629	2.50998	2.43111	2.35115	2.2619	2.16771	2.06564	1.96113	1.84954	1.73695	1.61667	1.49099	1.36781	1.23845	1.21214	1.1881	1.16636	1.14812	1.12849	1.10791	1.08814	1.07206	1.05251	1.03583	1.01671	0.999798	0.98154	0.964888	0.948743	0.930869	0.912579	0.895446	0.879161	0.862703	0.846176	0.827755	0.811935	0.793264	0.774926	0.757246	0.740326	0.722107
0.495426	2.82196	2.81419	2.79646	2.76952	2.73336	2.68961	0.0527628	2.57615	2.51112	2.43419	2.35297	2.26248	2.1681	2.06586	1.96271	1.84987	1.73443	1.61937	1.49304	1.36788	1.23842	1.21084	1.18898	1.16638	1.14868	1.12733	1.10908	1.08771	1.07155	1.05288	1.03521	1.01695	1.00007	0.982407	0.965281	0.948373	0.930137	0.911469	0.896652	0.879112	0.862754	0.844539	0.828465	0.811416	0.79227	0.77651	0.757626	0.739218	0.722258
0.496328	0.0564659	2.81421	2.7981	2.77102	2.73473	2.68949	2.64051	2.57773	2.51379	2.43512	2.35188	2.26226	2.17152	2.06687	1.96146	1.85178	1.73748	1.61588	1.49924	1.36211	1.23967	1.21148	1.18826	1.16754	1.14753	1.128	1.10694	1.09076	1.07122	1.05219	1.03551	1.01709	0.999034	0.982314	0.965209	0.948449	0.929438	0.912841	0.896712	0.880117	0.863074	0.84477	0.827292	0.810585	0.792865	0.775166	0.757173	0.739532	0.721673
0.497252	2.82498	2.81687	2.79979	2.77282	2.7363	2.69276	2.6391	2.578	2.5137	2.43845	0.0470999	2.26447	2.17055	2.06576	1.96391	1.85422	1.73933	1.61523	1.49459	1.36632	1.24067	1.21111	1.18954	1.16731	1.14717	1.12615	1.10888	1.0905	1.07078	1.05253	1.03555	1.01697	0.998671	0.98273	0.965217	0.947759	0.930017	0.912706	0.896993	0.879992	0.864034	0.843674	0.826982	0.809424	0.792416	0.775196	0.757311	0.740108	0.719348
0.49815	2.82649	2.81715	2.80102	2.77395	2.73833	2.694	2.64058	2.58299	2.51317	2.43906	2.35481	2.26714	2.17016	2.06701	1.96455	1.85451	1.74049	1.61682	1.49308	1.36955	1.23887	1.21267	1.18936	1.16676	1.14647	1.12784	1.1088	1.08996	1.07098	1.05296	1.03557	1.0172	0.999043	0.981352	0.965	0.947635	0.929864	0.914186	0.895105	0.880487	0.86261	0.84454	0.827747	0.809155	0.792427	0.774792	0.757777	0.738273	0.720641
0.499055	2.82807	2.81988	2.80042	2.77198	2.74036	2.69694	2.64029	2.58666	2.51379	2.44089	2.35645	2.26656	2.16992	2.07051	1.96536	1.85114	1.73841	1.61784	1.49438	1.36867	1.23958	1.21176	1.18948	1.16928	1.14521	1.12718	1.10891	1.08929	1.07183	1.05298	1.03605	1.01679	0.999576	0.981651	0.964028	0.94688	0.932216	0.91221	0.894661	0.880169	0.861409	0.844999	0.828728	0.80998	0.791253	0.776531	0.756301	0.738381	0.71941
0.49998	2.82976	2.82176	2.80206	2.77551	2.74074	2.69735	2.64376	2.58156	2.51834	2.44237	2.358	2.26753	2.17115	2.071	1.9635	1.85357	0.0347449	1.61636	0.0298741	1.36993	1.23984	1.21234	1.18915	1.16905	1.14641	1.12762	1.10743	1.09081	1.07051	1.05299	1.03496	0.0203383	1.00115	0.981491	0.96441	0.946501	0.929794	0.913211	0.896519	0.878972	0.862374	0.845497	0.827967	0.809136	0.790365	0.776255	0.756071	0.736753	0.719877
0.500848	2.83161	2.823	2.80334	2.77738	2.74285	2.69797	2.64839	2.58568	2.51704	2.44206	2.35723	2.26551	2.17334	2.07074	0.0393	1.85502	1.74035	1.61621	1.49308	1.37063	1.24058	1.2118	1.18849	1.16881	1.14794	1.12726	1.10742	1.08988	1.07138	0.0210638	1.03472	1.01848	0.998862	0.982233	0.965181	0.947307	0.929591	0.91294	0.896086	0.878276	0.862719	0.845163	0.828343	0.807122	0.791748	0.775501	0.756413	0.737848	0.718805
0.501759	2.83315	2.82241	2.80487	2.77826	0.0548613	2.69998	2.65012	2.58782	2.51902	2.44199	2.35657	2.27152	2.17257	2.07354	0.0393233	1.85456	1.74036	1.61853	1.49324	1.36869	1.24139	1.21162	1.18845	1.16845	1.148	1.1266	1.10926	1.08928	1.07092	1.05433	1.03439	1.01672	0.998852	0.983038	0.965021	0.947257	0.930985	0.913924	0.894346	0.879001	0.861907	0.844998	0.826825	0.808296	0.791407	0.774292	0.756778	0.737617	0.718378
0.502656	2.83393	2.8245	0.0561248	2.77934	2.7442	2.70184	2.6511	2.58859	2.51992	2.44547	2.36056	2.27122	2.1752	2.07351	1.96558	1.85492	1.73897	1.6203	1.49586	1.36913	1.24075	1.21377	1.18753	1.16941	1.14756	1.12873	1.10875	1.08835	1.07265	1.05328	1.03456	1.01644	0.0199817	0.982718	0.96447	0.948846	0.930037	0.913094	0.896326	0.87789	0.861421	0.844851	0.825774	0.808812	0.791955	0.772335	0.755606	0.738302	0.719891
0.503555	2.83497	2.82557	2.8085	2.78201	2.74548	2.70266	2.65095	2.58949	2.52166	2.44427	2.36116	2.27029	2.17764	2.07604	1.96554	0.0371613	1.74106	1.62004	1.49395	1.3711	1.24056	1.2117	1.19031	1.16804	1.14836	1.1298	1.10889	1.08979	1.07084	1.0531	1.03641	1.01683	0.99842	0.981905	0.965057	0.946315	0.93066	0.91294	0.896005	0.0175561	0.861218	0.844582	0.827285	0.807973	0.791151	0.772955	0.754875	0.737394	0.719548
0.504464	2.83627	2.82896	2.81075	2.7811	2.74668	2.70492	2.65173	2.59121	2.52305	2.44641	2.36301	2.26985	2.17532	2.07412	1.9702	1.85449	1.74318	1.62046	1.49405	1.37015	1.24058	0.024295	1.19068	1.16771	1.14941	1.12792	1.10904	0.021837	1.07	1.05318	1.03501	1.01626	0.999617	0.983009	0.964368	0.946782	0.93102	0.911641	0.894859	0.877027	0.863325	0.844132	0.825645	0.809901	0.791458	0.772566	0.755142	0.737116	0.717918
0.505361	2.83855	2.83082	2.81145	2.78354	2.74919	2.70373	2.65324	2.59562	2.52404	2.44677	2.36217	2.27003	2.17693	2.07695	1.96658	1.85731	1.74223	1.62018	1.49606	1.37119	1.24075	1.21399	1.19018	1.16871	1.14625	1.12999	1.11075	1.08997	1.06949	1.0535	1.03609	1.01678	1.00023	0.982625	0.96305	0.947264	0.930349	0.911848	0.895713	0.877718	0.860377	0.844009	0.827821	0.808143	0.790649	0.773963	0.755001	0.736379	0.718371
0.50628	2.8401	2.83244	0.0562662	2.7842	2.74907	2.70523	2.65534	2.59356	2.52588	2.44866	2.36347	2.27424	2.17956	2.07752	1.97009	1.85312	1.74337	1.62348	1.4975	1.36984	1.24028	1.2141	1.19284	1.16688	1.14938	1.12883	1.10983	1.09006	1.06963	1.05225	1.03649	1.01827	0.999447	0.98157	0.96357	0.948349	0.929503	0.911406	0.895879	0.87826	0.861536	0.84234	0.826648	0.80844	0.791023	0.773052	0.755011	0.735934	0.719877
0.507182	2.84328	2.8326	2.81412	2.78605	2.75363	2.70632	2.65379	2.59492	2.52777	0.0489688	2.36438	2.27506	2.1805	2.07675	1.96929	1.85579	1.74107	1.62498	1.49983	1.36852	1.24109	1.2137	1.19126	1.1683	1.1483	1.12938	1.10959	1.09058	0.0214152	1.0528	1.03608	1.01629	0.99842	0.983168	0.963546	0.947797	0.931003	0.912597	0.895015	0.877367	0.859522	0.842955	0.827486	0.809799	0.790649	0.772432	0.753661	0.736311	0.719059
0.508064	2.84435	2.83303	2.81474	2.78832	2.75319	2.70416	2.65656	2.59824	2.52826	2.4522	2.36514	2.27598	2.17901	2.07878	1.97264	1.85725	1.73907	1.62487	1.49988	1.3708	1.24089	1.21312	1.19031	1.16876	1.15025	1.12906	1.10971	1.09029	1.07234	1.05278	1.03531	1.01647	0.999245	0.981989	0.964451	0.94775	0.929486	0.912904	0.894339	0.877924	0.859638	0.842937	0.827342	0.808265	0.791533	0.771648	0.754229	0.735858	0.71833
0.508993	2.84523	2.83663	2.81745	2.78847	2.75505	2.70896	2.65757	2.59788	2.53068	0.0490087	2.36553	2.27835	2.17924	2.08101	1.97266	1.85672	1.74037	1.62227	1.50098	0.0274621	1.24082	0.0242715	1.19102	1.16776	1.14915	1.12866	1.11044	1.08971	1.07186	1.05407	1.03473	1.01691	0.998753	0.981792	0.965487	0.947498	0.929783	0.910585	0.896411	0.878061	0.859426	0.842094	0.825758	0.809358	0.791469	0.772036	0.753256	0.735814	0.718392
0.509898	2.84758	2.83617	2.819	2.79043	0.0550895	2.71038	2.65869	2.60034	2.53149	2.45192	2.36689	2.27765	2.18206	2.0818	1.97191	1.8567	1.7421	1.62391	1.50084	1.3735	1.24074	1.21291	1.19056	1.1702	1.14869	1.12868	1.10996	1.09	1.07187	1.05434	1.03343	1.01766	0.0199722	0.982001	0.964395	0.948163	0.929689	0.913265	0.893657	0.8771	0.01723	0.841784	0.824666	0.809664	0.791507	0.77085	0.753818	0.735934	0.717815
0.5108	2.84871	2.83936	2.82031	2.79217	2.75563	2.71067	2.65953	2.59929	2.53114	2.45384	2.3714	2.2764	2.18346	2.08061	1.97539	1.85632	1.74601	1.62179	1.4985	1.37332	1.24088	1.21338	1.19089	1.1691	1.14906	1.12721	1.11023	1.09136	1.07182	1.05256	1.03527	1.01735	1.00039	0.981594	0.9653	0.947257	0.929762	0.910477	0.895358	0.877426	0.861288	0.842766	0.825262	0.806551	0.791989	0.771924	0.752356	0.735943	0.71723
0.51171	0.0569944	2.84182	2.82119	2.79347	2.75815	2.71491	2.66019	2.60256	2.53093	2.45335	2.37212	2.28175	2.18771	2.07748	1.97238	1.85836	1.74302	1.62427	1.49898	1.37198	1.24115	1.21307	1.19072	1.16969	1.14856	1.12907	1.1094	1.09054	1.07226	1.05403	1.03527	1.01736	0.999939	0.982997	0.96407	0.948121	0.92996	0.910495	0.894605	0.877379	0.860563	0.841613	0.825048	0.807488	0.79007	0.770924	0.754904	0.734893	0.718894
0.512624	2.85064	2.84126	2.82375	2.79565	2.76102	2.71378	2.66365	2.60029	2.53549	2.45774	2.37392	2.2814	2.18621	2.07868	1.97452	1.86034	1.74389	1.62108	1.50052	1.37249	1.24124	1.21234	1.19186	1.16847	1.14986	1.12849	1.11024	1.0909	1.07284	1.05427	1.03539	1.01729	0.999617	0.982456	0.964328	0.945822	0.929945	0.910955	0.894926	0.878447	0.860487	0.842103	0.82398	0.806605	0.78812	0.771185	0.754864	0.735046	0.717292
0.513493	2.85101	2.843	2.82462	2.7979	2.76242	2.71652	2.66417	2.60167	2.53552	2.46093	2.37515	2.28408	2.18579	2.07896	1.97185	1.86068	1.74705	0.0324025	1.50216	1.37366	1.24083	1.21375	1.19311	1.1686	1.15115	1.12937	1.10803	1.09047	1.07215	1.05501	1.03584	1.0157	1.00022	0.983278	0.963993	0.947573	0.928846	0.910865	0.0178928	0.876661	0.859663	0.843952	0.824437	0.805079	0.789502	0.771842	0.754053	0.734526	0.716556
0.514421	2.85465	2.84513	2.82572	2.79729	2.76424	2.71727	2.66531	2.60573	2.53462	2.45617	2.37764	2.28468	2.18447	2.08084	1.97393	1.86246	1.74478	1.62354	1.49935	0.0274976	0.0248348	0.0243151	1.191	1.17047	1.15034	1.13116	1.10896	1.08953	1.07154	1.05401	1.03595	1.01761	1.00041	0.981491	0.964253	0.947283	0.929936	0.910748	0.894262	0.876529	0.860149	0.0168283	0.824601	0.805684	0.789263	0.77341	0.752165	0.735065	0.715937
0.51535	2.8561	2.84609	2.82874	2.79956	2.7642	2.72011	2.66874	2.60542	2.53589	2.46046	2.37533	2.28206	2.18916	2.07972	1.97365	1.8625	1.7469	1.62133	1.50574	1.37163	1.24084	1.21535	1.1922	1.1699	1.14865	1.13043	1.10996	1.09013	1.07161	1.05343	1.03503	1.01776	1.00034	0.983151	0.963935	0.948411	0.929862	0.910946	0.893928	0.876233	0.858923	0.841219	0.823221	0.807804	0.788971	0.771051	0.75201	0.734987	0.717581
0.516262	2.85802	2.84813	2.82993	2.80151	2.76565	2.72182	2.66811	2.6067	2.53763	2.46352	2.375	2.28133	2.18626	2.08083	1.97432	1.86618	1.74742	1.62591	1.50003	1.37183	1.24147	1.21482	1.19296	1.16924	1.14859	1.12955	1.10957	1.09013	1.07189	1.05386	1.03633	1.01719	1.00104	0.982737	0.965356	0.946596	0.929932	0.910396	0.892349	0.878889	0.0171713	0.840925	0.824089	0.806649	0.788298	0.771954	0.752134	0.0146652	0.71635
0.517179	2.85784	2.84962	2.82958	2.80378	2.76608	2.72277	2.66867	2.60784	2.53927	2.45887	2.37658	2.28391	2.18804	2.07955	0.0396066	1.86344	1.74877	0.0325386	1.49998	1.3746	1.2407	1.2152	0.0238271	1.16952	1.14953	1.12953	1.11036	1.09109	1.07163	1.05265	1.03598	1.01768	1.00081	0.982737	0.965017	0.946697	0.930337	0.910793	0.894146	0.87631	0.85846	0.841498	0.824167	0.805763	0.787788	0.771021	0.752581	0.733337	0.717862
0.518089	2.85999	2.85019	2.83096	2.80512	2.76776	2.7239	2.66983	2.60952	2.5384	2.4646	2.37698	2.28657	2.18882	2.08574	0.0395065	1.86577	1.75164	1.62552	1.49877	1.37417	1.24145	1.2146	1.19052	1.16932	1.15007	1.12979	1.1101	1.08995	0.021424	1.05311	1.03634	1.01888	1.00029	0.982426	0.965633	0.946434	0.930363	0.912047	0.893092	0.874907	0.858361	0.841531	0.824323	0.806379	0.789017	0.769871	0.750892	0.735039	0.715793
0.518977	0.0572087	2.8514	2.83359	2.80573	2.77103	2.72444	0.026695	2.60978	2.54143	0.049191	2.37993	2.289	2.18922	2.08957	1.97576	1.86667	1.74681	1.62879	1.50139	1.37227	1.24152	1.21488	1.19191	1.17035	1.15042	1.12868	1.11034	1.08931	1.07161	1.05414	1.03517	1.01998	0.999034	0.984229	0.965414	0.946422	0.929622	0.911407	0.893462	0.876232	0.857489	0.841514	0.823181	0.807195	0.788672	0.769849	0.749861	0.732807	0.71723
0.519896	2.86082	2.8519	0.056711	2.80798	2.77002	2.72397	2.67097	2.61019	2.53833	2.4663	2.37747	2.29037	2.19065	2.08901	1.97873	1.86375	1.74978	1.62708	1.49892	1.3756	1.24195	1.21596	0.0238449	1.16963	1.14962	1.1288	1.10899	1.08939	1.07213	1.05512	1.03538	1.01804	1.00084	0.984617	0.964952	0.946142	0.929226	0.910522	0.89314	0.875589	0.859539	0.840966	0.823466	0.804982	0.78859	0.769401	0.751379	0.73329	0.715442
0.520798	2.86106	0.0570752	2.83603	2.80937	2.77011	2.72536	2.67255	2.61114	2.54054	2.46779	2.37977	2.29028	2.19297	2.08798	1.97771	1.86578	1.74915	1.62862	1.49749	1.37589	0.0248283	0.0243104	1.19327	1.1697	0.0229845	1.12922	1.10941	1.09122	1.07211	1.05381	1.03571	1.01838	1.00098	0.983891	0.96488	0.948141	0.928482	0.910577	0.892958	0.874868	0.858774	0.840009	0.823474	0.805579	0.78686	0.770051	0.751541	0.733228	0.715924
0.521708	2.86298	2.85534	2.83791	2.80929	2.77332	2.72666	2.67133	2.61094	2.5425	2.46549	2.38275	2.29036	2.19194	2.0893	1.97793	1.8669	1.75042	1.62727	1.50002	1.37344	1.24182	1.21595	1.19224	1.16891	1.15118	1.12873	1.10835	1.09248	0.0214714	1.05367	1.03543	1.0193	1.00037	0.982607	0.964903	0.947985	0.927805	0.91285	0.892041	0.87413	0.858138	0.841285	0.822661	0.805923	0.786507	0.768244	0.749859	0.733577	0.716137
0.522628	2.86511	2.8563	2.83824	2.81042	2.77434	2.72648	2.67355	0.0522269	2.54699	2.46244	2.38458	2.29079	2.1925	2.08646	1.97936	0.0373164	1.7499	1.62942	1.49855	1.37416	1.24226	1.21597	1.19179	1.17021	1.15053	1.12988	1.11028	1.0914	1.0728	1.05425	1.03549	1.01538	1.00268	0.984101	0.963927	0.947605	0.929687	0.910667	0.892351	0.874675	0.857705	0.840001	0.823566	0.805868	0.786813	0.768312	0.749695	0.732654	0.716597
0.523551	2.86653	2.85722	2.83921	2.81084	2.774	2.7298	2.67617	2.61359	2.54299	2.46679	2.38395	2.29406	2.19337	2.08619	1.98051	1.86915	1.74955	1.62383	1.50263	1.3724	1.24185	1.21542	1.19239	0.0234386	1.15036	1.13149	1.1096	1.09214	1.07244	1.05356	1.03509	1.01794	1.00005	0.983403	0.96514	0.94639	0.930175	0.910694	0.892184	0.874598	0.856322	0.84095	0.822675	0.804997	0.786799	0.768304	0.750624	0.733702	0.71415
0.524455	2.86816	2.85805	2.84149	2.81169	2.77489	2.7334	2.67665	2.61752	2.54504	2.46992	2.38231	2.29393	2.19441	2.08761	1.98471	1.86776	1.75047	1.62455	1.50184	1.37573	1.24174	1.21419	1.19359	0.0234348	1.15041	1.1312	1.11122	1.0911	1.07375	0.0210678	1.03467	1.01696	1.00051	0.983085	0.965246	0.947117	0.018557	0.910604	0.893527	0.874173	0.85591	0.840132	0.823644	0.803658	0.787683	0.768347	0.751062	0.732231	0.714851
0.525345	2.86814	2.85947	0.0568103	2.81451	2.77678	0.0546346	0.053563	2.6194	2.54943	2.46569	2.38557	2.29479	2.19347	2.09128	1.98113	1.86973	1.74974	1.62663	1.50405	1.37548	1.24143	1.21661	1.19315	1.1715	1.14975	0.0226415	1.11081	1.09038	1.0727	1.0546	1.03564	1.01653	1.00097	0.981895	0.965419	0.946686	0.928519	0.911046	0.892426	0.873727	0.857177	0.839608	0.82196	0.804447	0.785729	0.768945	0.752373	0.730846	0.715229
0.526244	2.86952	2.86017	2.8424	2.81418	2.77832	2.73343	2.67822	2.61991	2.54967	2.46799	2.38566	2.29366	2.19632	2.09351	1.98218	1.87022	1.74895	1.62896	1.50235	1.37198	1.24321	1.2155	1.19222	1.17038	1.15202	1.13287	1.11036	1.09172	1.07251	1.05367	1.03639	1.01779	0.999415	0.982186	0.967102	0.946283	0.928347	0.908421	0.892685	0.874242	0.856984	0.839411	0.822131	0.802049	0.788072	0.768714	0.749897	0.732322	0.714927
0.527159	2.87144	2.86114	2.84312	2.81467	2.77846	2.73459	2.68138	0.0523924	2.55274	2.47003	2.38516	2.2945	2.19774	2.09107	1.98524	1.86789	1.75239	1.62759	1.49885	1.37336	1.24341	1.21586	1.19249	1.17012	1.15301	1.13084	1.11161	1.09084	1.07339	1.05518	1.03513	1.01808	0.999054	0.982259	0.964255	0.945684	0.929182	0.910495	0.892373	0.873594	0.858659	0.839232	0.820631	0.803049	0.786923	0.768811	0.749409	0.734076	0.714267
0.528078	2.87158	2.86322	2.84325	2.81578	2.78189	2.73677	2.68392	2.62293	2.55238	2.47199	2.38483	2.29661	2.196	2.09321	1.98495	1.86882	1.75267	1.62644	1.50238	1.37463	1.24337	1.21465	1.19397	1.17267	1.1523	1.12927	1.10962	1.09285	1.07477	1.05548	1.03484	1.0173	0.999386	0.982407	0.962662	0.945976	0.928366	0.910423	0.892844	0.873963	0.857793	0.840254	0.819759	0.802783	0.785647	0.769101	0.750709	0.732828	0.714604
0.528963	2.87439	2.86387	2.84606	2.81736	2.78086	2.73743	2.68773	0.0524271	2.54967	2.47499	2.38701	2.29492	2.19771	2.09392	1.98662	1.8697	1.75068	1.62985	1.50429	1.37392	1.2432	1.21647	1.19325	1.17341	1.15001	1.13191	1.11086	1.09167	1.07423	1.05492	1.03555	1.01837	0.998691	0.982035	0.963331	0.944555	0.927452	0.911939	0.892305	0.875113	0.856697	0.839362	0.82067	0.803416	0.786561	0.767176	0.751122	0.731806	0.713476
0.52987	2.87629	2.86716	2.8482	2.81861	2.78122	2.74041	2.68427	2.62136	2.55362	2.47369	2.39064	2.29546	2.1989	2.0939	1.98458	1.87049	1.75171	1.62996	1.50249	1.37355	1.24333	1.21631	1.19323	1.17363	1.14909	0.0226285	1.11084	1.09332	1.07231	1.05467	1.03557	1.01829	1.00014	0.980671	0.963306	0.944308	0.928067	0.911217	0.892472	0.874525	0.858238	0.838152	0.819707	0.804013	0.78587	0.767952	0.7511	0.730494	0.713524
0.5308	2.87717	2.86764	2.8489	0.0564152	2.78299	2.73857	2.68518	2.62406	2.55512	2.47325	2.38602	2.29812	2.20054	2.09362	1.98437	1.87151	1.75377	1.62916	1.50597	1.37734	1.24405	1.21602	1.19082	1.17339	1.15225	1.13049	1.11073	1.09193	1.07251	1.05543	1.03675	1.01868	0.998209	0.0196381	0.961715	0.944773	0.92843	0.910442	0.893635	0.873929	0.857453	0.83897	0.821427	0.802416	0.0156933	0.767282	0.749767	0.733678	0.713442
0.531702	2.87913	2.86849	2.85042	2.82184	2.78649	2.73904	2.68725	2.62611	2.55687	2.47172	2.38789	2.29941	2.198	2.09711	1.98359	1.87166	0.0350762	1.6313	1.5055	1.37566	1.24477	1.21696	1.19213	1.17225	1.15308	1.13106	1.1116	1.09128	1.07268	1.0551	1.0369	1.01756	0.998832	0.981325	0.964237	0.944415	0.927687	0.911452	0.891462	0.87537	0.855179	0.840098	0.820408	0.804403	0.784845	0.76743	0.749365	0.730781	0.713916
0.532627	2.87878	2.87013	2.8509	2.82223	2.78839	2.74286	2.68574	2.62594	2.55674	2.47539	2.38895	2.29947	2.19909	2.09426	1.98372	1.87306	1.75484	1.63318	1.50425	1.37537	1.24487	1.21786	1.19434	1.17054	1.15302	1.13165	1.11116	1.09134	1.07206	1.05511	1.03605	1.01758	0.999798	0.980297	0.964313	0.944536	0.92709	0.9111	0.893281	0.875104	0.855399	0.839739	0.82157	0.80242	0.784927	0.766743	0.749784	0.731494	0.712618
0.533518	2.88009	2.87046	2.85336	2.82432	2.7884	2.74285	2.68859	2.62799	2.55694	0.0495522	2.39007	2.29596	2.20044	2.09683	1.98267	1.87356	1.75424	1.6341	1.50498	1.3784	1.2441	1.21647	1.1935	1.17257	1.15205	1.13099	1.11191	1.09079	1.0732	1.05428	1.03532	1.01786	0.999617	0.980392	0.962517	0.945837	0.929132	0.908655	0.893741	0.874199	0.856492	0.840106	0.820278	0.801686	0.785122	0.767385	0.750397	0.730722	0.0142494
0.534422	2.88199	2.8721	2.85562	2.82655	2.78936	2.74355	2.68945	0.0525562	2.55765	2.4803	2.39153	2.30035	2.19981	2.09378	1.989	1.87261	1.75421	1.62478	1.51124	1.378	1.24423	1.21602	1.19406	1.17274	1.1512	1.13244	1.11144	1.09233	1.0726	1.05562	1.03505	1.01702	0.0199658	0.980348	0.963493	0.945394	0.92824	0.910739	0.891909	0.874255	0.857028	0.838193	0.821331	0.802822	0.784582	0.767849	0.749056	0.730444	0.71228
0.535326	2.88492	2.87372	2.85566	2.82802	2.78917	2.7455	2.69074	0.0525716	2.55859	2.4808	2.39476	2.29841	2.20232	2.09655	1.9869	1.87411	1.75294	1.63157	1.50793	1.3774	1.24414	1.21737	1.19276	1.17331	1.15294	1.13135	1.11297	1.09189	1.07235	1.0551	1.03579	1.01693	1.00048	0.980985	0.961697	0.944901	0.0185486	0.91055	0.892056	0.874542	0.855102	0.839101	0.821363	0.802147	0.785025	0.767594	0.748235	0.731023	0.712527
0.536243	2.88627	2.87628	2.8577	2.82724	2.7932	2.74741	2.69221	2.62851	2.56391	2.47849	2.39425	2.30244	2.20262	2.09247	1.98902	1.8744	1.75783	1.63127	1.50586	1.37828	1.24499	1.21762	1.19431	1.17179	1.15151	1.13259	1.11258	1.09145	1.0735	1.05476	1.03653	1.01618	1.00028	0.980943	0.961662	0.944761	0.928664	0.909296	0.8906	0.875135	0.856506	0.838536	0.820875	0.803537	0.783401	0.767976	0.748746	0.731155	0.712033
0.537129	2.88677	2.87879	2.85858	2.83111	2.79264	2.74796	2.69157	2.63032	2.55933	2.4811	2.39673	2.3017	2.20662	2.09386	1.9874	1.876	1.75719	1.63062	1.50452	1.37816	1.24461	1.21929	1.19459	0.0234297	1.15281	1.1317	1.11229	1.09226	1.0739	1.05415	1.03694	1.01646	0.999708	0.980492	0.96316	0.946193	0.927119	0.908177	0.892283	0.874044	0.855868	0.837988	0.821924	0.802065	0.785248	0.766459	0.748701	0.731899	0.711098
0.538038	2.88736	2.87888	2.86014	2.83192	2.79152	2.74943	2.69444	2.6321	2.56068	2.48086	2.39895	2.30279	2.20336	2.098	1.98944	1.87579	1.75584	1.6312	1.50264	1.38052	1.2453	1.2189	1.19381	1.17478	1.15027	1.13246	1.11125	1.09309	1.07223	1.05665	1.03721	1.01692	0.998389	0.0196026	0.963031	0.945965	0.92773	0.907328	0.891828	0.876091	0.855003	0.83973	0.820527	0.801967	0.784778	0.765602	0.749207	0.73048	0.712417
0.538937	2.88976	2.87894	2.8615	2.83322	2.79393	2.75073	2.69435	2.6333	2.56068	2.48266	2.39521	2.30481	2.20574	2.10114	1.9893	1.87317	1.75705	1.63153	1.50852	1.37725	1.24496	1.21614	1.1958	1.1741	1.15104	1.13028	1.11289	1.09287	1.07465	1.05363	1.03612	1.01969	0.997512	0.979927	0.962687	0.945772	0.928121	0.90879	0.890556	0.874774	0.855704	0.839035	0.821456	0.80189	0.78488	0.765624	0.747989	0.730301	0.712149
0.539846	2.88946	2.88166	2.86191	2.8348	2.79666	2.75051	2.69568	2.63462	2.56111	2.48408	2.3981	0.0460783	2.20414	2.10173	0.0397838	1.87472	1.75353	1.6342	1.50665	1.37755	1.24663	1.21798	1.19545	1.17233	1.152	1.13184	1.11151	1.09465	1.07448	1.05428	1.03548	1.01722	0.998913	0.980811	0.963875	0.945447	0.925916	0.909729	0.89179	0.873649	0.854819	0.838038	0.821214	0.80294	0.785269	0.766571	0.747938	0.729983	0.710747
0.540729	2.88996	2.88242	2.86395	2.83482	2.7975	2.75038	2.69635	2.63296	2.56452	2.48591	2.39854	2.30372	2.20617	2.10271	1.98871	1.87499	1.75219	1.63564	1.50574	1.378	1.24637	1.21958	1.1934	1.17288	1.15266	1.13318	1.1112	0.0218724	1.0729	1.05687	1.03552	1.01777	0.999436	0.979491	0.962488	0.945816	0.928006	0.908249	0.891438	0.873521	0.855573	0.837989	0.820599	0.802955	0.78375	0.766856	0.747529	0.729244	0.712733
0.541635	2.89136	2.88329	2.86444	2.83636	2.8008	2.75102	2.69533	2.63456	2.56581	2.48718	2.40013	2.30211	2.20933	2.10326	1.98851	1.87542	1.75548	1.63076	1.50802	1.37862	1.24693	1.21795	1.19397	1.17369	1.15253	1.13228	1.11271	1.09291	1.07494	1.05524	1.03537	1.01815	0.999638	0.981592	0.961091	0.945367	0.927658	0.910351	0.890614	0.872594	0.856475	0.837302	0.819914	0.801726	0.784222	0.765706	0.748422	0.728804	0.712046
0.542547	2.8918	2.8838	2.86461	2.8378	2.80005	2.75432	2.69543	2.63711	2.56593	2.48764	2.39852	2.30811	2.20912	2.10424	1.99032	1.87612	1.75507	1.6307	1.50567	1.38159	1.24747	1.21758	1.19654	1.1725	1.15197	1.13218	1.11285	1.09361	1.07387	1.05443	1.03674	1.01681	0.999446	0.982033	0.963254	0.94401	0.926873	0.909846	0.891252	0.872371	0.0170888	0.839035	0.820719	0.802261	0.783197	0.765803	0.74793	0.728693	0.711255
0.543421	2.89517	2.88428	0.0573216	2.83626	2.80159	2.75473	2.69911	2.63957	2.56654	2.48862	2.39968	0.0461782	2.21081	2.10343	1.98875	1.87866	1.75583	1.63165	1.51009	1.37824	1.24675	1.21964	1.19515	1.17428	1.15171	1.13304	1.11116	1.09286	1.07348	1.05583	1.03731	1.01723	0.998118	0.982436	0.962211	0.946149	0.926548	0.90853	0.889936	0.873293	0.856284	0.83677	0.820038	0.803369	0.784193	0.766422	0.747622	0.728721	0.710529
0.54431	2.89529	2.88594	2.867	2.83764	2.80276	2.7574	2.70021	2.64015	2.56823	2.48715	2.40239	2.30805	2.20938	2.10557	1.99129	1.87827	1.75777	1.631	1.50902	1.37891	1.24676	1.21929	1.19363	1.17404	1.15378	1.13204	1.11183	1.0942	1.07271	1.05632	1.03575	1.01735	1.00009	0.981445	0.962559	0.945317	0.926617	0.90796	0.890856	0.872229	0.857543	0.836795	0.819235	0.802323	0.783816	0.765914	0.749139	0.729804	0.709642
0.545207	2.89681	2.88729	2.86838	2.83904	2.80068	2.76128	2.7037	2.63898	2.56914	2.49013	2.40263	2.30862	0.0442048	2.10843	1.99263	1.87779	1.7572	1.63368	1.50949	1.37847	1.24732	1.21701	1.19666	1.17339	1.15332	1.13189	1.11274	1.09427	1.07348	1.05513	1.03639	1.01842	0.998611	0.9807	0.963337	0.943249	0.927605	0.906932	0.891476	0.873757	0.855654	0.838749	0.0163738	0.801804	0.783805	0.0153338	0.745648	0.730395	0.710198
0.546108	2.89792	2.88828	2.87005	2.83894	2.80393	2.7609	2.70189	2.64259	2.57094	2.49181	2.40189	2.30836	2.2122	2.10647	1.99556	1.87545	1.76181	1.63614	1.50588	1.382	1.24636	1.21943	1.19592	1.17423	1.15211	1.13418	1.11221	1.09259	1.07486	1.05558	1.03561	1.01798	1.00007	0.980473	0.961339	0.944094	0.927165	0.908069	0.89106	0.872989	0.855168	0.838569	0.819689	0.801991	0.782905	0.0153187	0.74697	0.729279	0.710419
0.547013	2.89908	2.88693	2.87046	2.84158	2.80578	2.76051	2.70651	2.64489	2.5729	2.49171	2.40191	2.31174	2.21004	2.10536	1.99791	0.0375738	1.76025	1.63586	1.50726	1.37806	1.24938	1.21863	1.19636	1.1725	1.15194	1.13275	1.11371	1.09335	1.07411	1.05613	1.03587	1.01867	0.998702	0.98061	0.0192517	0.944097	0.925671	0.90778	0.891126	0.872882	0.856579	0.837449	0.0163996	0.801293	0.782881	0.76457	0.747272	0.729306	0.711387
0.547916	2.89826	2.88996	2.86921	0.0568819	2.80772	2.75889	2.7063	2.64431	2.57342	2.49181	2.40465	2.31313	2.21043	2.10831	1.99447	1.8789	1.7599	1.63682	1.50915	1.38059	1.24852	1.21839	1.19567	1.17417	1.15374	1.1326	1.11175	1.09422	1.07433	1.05433	1.03728	1.01733	1.00012	0.980769	0.961805	0.944748	0.926665	0.907545	0.889442	0.873298	0.0171132	0.83928	0.819256	0.801476	0.78405	0.764944	0.74397	0.728563	0.710232
0.548811	2.89957	2.88911	2.87231	2.84455	2.808	2.7612	2.70724	2.64524	2.57119	2.49442	2.40373	2.31433	2.21085	2.10824	1.99826	1.8788	1.7598	1.63618	1.5128	1.38042	1.24738	1.21907	1.19622	1.17423	1.15216	1.13277	1.11358	1.09485	1.07366	1.05367	1.03711	0.0203599	0.999547	0.981635	0.963264	0.94453	0.925308	0.90797	0.888865	0.87307	0.856439	0.838128	0.819974	0.799962	0.783817	0.764497	0.745519	0.727797	0.710247
0.54973	2.9009	2.89051	2.8723	2.8462	2.8109	2.76228	2.70948	2.64523	0.0514479	2.49196	2.4066	2.31228	2.21069	2.10473	2.0008	1.88055	1.76257	1.63825	1.51023	1.38118	1.24756	0.0243814	1.19658	1.17476	1.15306	1.13195	1.11368	1.09466	1.07487	1.05398	1.03517	1.0195	0.998701	0.980252	0.962954	0.944867	0.926328	0.908673	0.889371	0.872886	0.856438	0.83771	0.819761	0.800368	0.783621	0.762071	0.746371	0.727477	0.708832
0.550624	2.90207	2.89191	2.87299	2.84592	2.81	2.76585	2.70674	2.64605	2.57224	2.4927	2.40629	2.31299	2.21432	2.10795	1.99674	1.8836	1.76407	1.63797	1.50813	1.38224	1.24732	1.2204	1.19699	1.17457	1.1534	1.13233	1.1147	1.09303	1.07386	1.05549	1.03702	1.01713	0.997947	0.981565	0.96273	0.944399	0.926666	0.90843	0.889648	0.873302	0.855725	0.837637	0.818944	0.800477	0.782846	0.762804	0.7454	0.728688	0.708371
0.551513	2.90223	2.89241	2.87408	2.84695	2.81095	2.7652	2.71023	2.64612	2.57416	2.49544	2.40851	2.31158	2.21478	2.109	1.99669	1.8847	1.76185	1.63859	1.51263	0.0275591	1.24816	1.21884	1.19585	1.17466	1.15293	1.13407	1.11207	1.09447	1.07564	1.05534	1.03458	1.01612	0.999065	0.981271	0.962868	0.945095	0.925833	0.0181585	0.889756	0.8728	0.855066	0.837874	0.819603	0.801394	0.781624	0.764088	0.74526	0.727948	0.708782
0.552426	2.9053	2.89569	2.8748	2.84922	2.81093	2.76649	0.0542257	2.64788	2.57278	2.49744	2.40809	2.31611	2.21385	2.10989	1.99972	1.88166	1.76364	1.63995	1.51322	1.3811	1.24833	1.21913	0.0239133	1.17487	1.15402	1.13365	1.11301	1.09339	1.07575	1.05492	1.03532	1.01644	0.999255	0.979817	0.962796	0.94328	0.925371	0.908565	0.890431	0.874151	0.855411	0.838078	0.819026	0.800274	0.781167	0.764018	0.745561	0.726004	0.710431
0.553336	2.90658	2.89581	2.87564	2.85126	0.05623	2.76548	2.71346	2.64816	2.5767	2.49305	2.40959	2.31764	2.2149	2.11679	1.99967	1.88604	1.75851	1.6395	1.5139	1.38249	1.24822	1.22006	1.19619	1.17527	1.15381	1.13426	1.11273	1.09277	1.07584	1.05514	1.03614	1.01726	0.998249	0.981337	0.96019	0.944845	0.924928	0.908321	0.890407	0.873195	0.854007	0.837572	0.819457	0.800153	0.782081	0.764587	0.744898	0.727657	0.708046
0.554247	2.90643	2.89529	2.87844	2.85122	2.81573	2.76637	2.7134	2.64771	2.57853	2.49612	2.40836	2.31497	2.21798	2.11618	2.00124	1.88353	1.7626	1.63927	1.51316	1.38331	1.24843	1.2203	1.19625	1.17448	1.15289	1.13458	1.113	1.09392	1.07379	1.05583	1.03708	1.01642	0.999156	0.97977	0.962917	0.942905	0.924927	0.909278	0.889721	0.872362	0.855296	0.837293	0.818029	0.800855	0.78208	0.76485	0.744698	0.72579	0.709622
0.555141	2.90828	2.90008	2.87813	2.85309	2.81389	2.77057	2.71386	2.64644	2.5808	2.49517	2.40853	2.32013	2.21708	2.11476	2.00165	1.88139	1.76673	1.63803	1.5132	1.38318	1.24905	1.22135	1.19752	1.17522	1.1538	1.13382	1.11184	1.09444	1.07412	1.05444	1.03625	1.01866	0.998381	0.980321	0.963312	0.943021	0.925561	0.907564	0.889965	0.872779	0.854976	0.836508	0.820442	0.799294	0.781938	0.76399	0.745084	0.727257	0.706982
0.556042	2.91062	2.90002	2.88256	2.85131	2.81591	2.77134	2.71898	2.64818	2.57737	2.50073	2.41013	2.31893	2.22019	2.1191	1.99967	1.88002	1.76542	1.64038	1.51464	1.38355	1.24957	1.22008	1.19654	1.17451	0.0230739	1.13456	1.11317	1.09447	1.0735	1.05421	1.03611	1.01871	0.997614	0.982051	0.960858	0.943651	0.926473	0.907554	0.888481	0.87277	0.854251	0.837604	0.819685	0.799496	0.780941	0.76408	0.747016	0.725955	0.708275
0.556944	2.91182	2.90141	2.88369	2.85285	2.81819	0.0554319	2.71716	2.64963	2.57775	2.49934	2.41345	2.31875	2.21951	2.11851	2.00122	1.88597	1.76579	1.64167	1.51535	1.38138	1.24948	1.2199	1.19545	1.17577	1.15339	1.13329	1.1137	1.09509	1.07409	1.05461	1.03524	1.01794	0.999588	0.979756	0.96223	0.943972	0.925659	0.907023	0.889587	0.872294	0.854572	0.837048	0.819024	0.800593	0.781055	0.761902	0.746135	0.726576	0.70761
0.557865	2.91235	2.90425	2.88394	2.85512	2.81942	0.0554341	2.71416	2.65039	2.57809	2.49931	2.41651	2.32067	2.21654	2.11793	2.00641	1.88604	1.76432	1.64317	1.51398	1.38331	1.24885	1.22046	1.19731	1.17578	1.15416	1.13194	1.11445	1.09431	1.07364	1.05634	1.036	1.01513	1.00048	0.98145	0.962645	0.943909	0.924883	0.907375	0.017782	0.871582	0.855849	0.836288	0.819196	0.800602	0.781122	0.761811	0.744235	0.727331	0.708219
0.558779	2.91411	0.0290509	0.0577032	2.85607	2.82005	2.77071	2.71444	2.65407	2.57883	2.50189	2.41638	2.32259	2.22147	2.11623	2.00334	1.88857	1.76491	1.64132	1.51588	0.0276979	1.24968	1.21855	1.19773	1.17622	1.15318	1.1318	1.11467	1.0948	1.07388	1.05421	1.03746	1.01663	0.999315	0.980301	0.962149	0.944468	0.926254	0.908394	0.888702	0.870681	0.854291	0.837343	0.818351	0.799598	0.781654	0.761938	0.745471	0.725866	0.7071
0.559672	2.91446	2.90548	2.88686	2.85679	2.82006	2.77334	2.72122	2.6524	2.58077	2.50198	2.41729	2.32406	2.22027	2.11598	0.0401297	1.88711	1.76695	0.0328318	1.51548	1.38319	1.24925	1.22062	1.1977	1.1745	1.15249	1.13438	1.1142	1.09487	1.07378	1.05431	1.03539	1.0182	0.998429	0.981383	0.962968	0.944193	0.925262	0.907465	0.88966	0.8718	0.854695	0.836508	0.81759	0.79899	0.78175	0.764111	0.744124	0.725706	0.707247
0.560573	2.91506	2.90728	2.88742	2.85849	2.8238	2.77366	2.7168	2.65649	2.58169	2.50423	2.41648	2.32508	2.22229	2.11635	2.00849	1.8852	1.76589	1.63948	1.51548	1.38319	1.24967	1.22047	1.19843	1.17411	1.15336	1.13348	1.11324	1.09389	1.07494	1.05446	1.03562	1.01874	0.998953	0.980208	0.961996	0.944795	0.925696	0.906905	0.889599	0.871908	0.854991	0.836402	0.818459	0.7978	0.780792	0.763566	0.744658	0.725513	0.706694
0.561461	2.9163	2.90759	2.89002	2.86102	2.82181	2.77482	2.71833	2.65566	2.57972	2.50653	2.41752	0.0232435	2.22135	2.11919	2.00441	1.88812	1.76812	1.64299	1.51384	1.38141	1.24957	1.22227	1.19814	1.17551	1.15408	1.1332	1.11274	1.09578	1.07346	1.05481	1.03782	1.01762	0.998863	0.980451	0.962152	0.943504	0.923627	0.907744	0.890556	0.872873	0.854844	0.835732	0.81765	0.799193	0.779107	0.764207	0.744941	0.724769	0.706555
0.562385	2.91779	2.90808	2.8912	2.86179	2.82489	2.77487	2.7214	2.65454	2.58237	2.50666	2.4185	2.32349	2.2241	2.11709	2.00309	1.88894	1.76719	1.64377	1.51389	1.38385	1.25031	1.22137	1.19729	1.1765	1.15378	1.13208	1.11406	1.09499	1.07529	1.05452	1.03551	1.01729	1.00078	0.980174	0.962621	0.942815	0.926573	0.907707	0.889613	0.871106	0.853942	0.836279	0.818113	0.799177	0.779683	0.763411	0.745636	0.724789	0.704817
0.563284	2.91885	2.90985	2.89035	2.8628	2.82646	2.77762	2.71979	2.65695	2.58973	2.50555	2.41758	2.32467	2.22727	2.11733	2.00163	1.88824	1.77007	1.64675	1.51391	1.38828	1.24928	1.22126	1.19794	1.17551	1.15455	1.1326	1.11389	1.09305	1.0765	1.05572	1.03546	1.01838	0.999225	0.981675	0.960891	0.944165	0.92645	0.907194	0.889071	0.871612	0.852562	0.837024	0.817547	0.799092	0.780672	0.762419	0.74502	0.72364	0.705732
0.564197	2.92019	2.90959	2.89229	2.8644	2.82721	2.77699	2.72084	2.65983	2.58805	2.50635	2.41904	2.32412	2.22699	2.12003	2.00371	1.88922	1.76875	0.0329075	0.0303359	0.0276548	1.25062	1.22119	1.19685	1.17672	1.15266	1.13407	1.11361	1.09449	1.07361	1.05721	1.03651	1.01865	0.998208	0.980189	0.962325	0.945151	0.925143	0.906292	0.889968	0.87177	0.854251	0.835838	0.816455	0.799861	0.780942	0.761863	0.743633	0.72499	0.705783
0.565083	2.92173	2.91086	2.89385	2.8648	2.82546	2.77853	2.72099	2.65836	2.58976	2.50832	2.42237	2.32421	2.2238	2.12017	2.00769	1.89062	1.76675	1.64571	1.51718	1.38389	1.25061	1.22072	1.19632	1.17695	1.15385	1.13382	1.11379	1.09372	1.0736	1.05648	1.03847	1.01758	0.997977	0.979954	0.963579	0.943785	0.925933	0.0181437	0.888914	0.872744	0.853039	0.835086	0.817894	0.799775	0.780163	0.761061	0.743759	0.724528	0.706676
0.566018	2.92246	2.91352	2.89436	2.86407	2.82646	2.78124	2.72235	2.65894	2.59077	2.50881	2.42194	2.32515	2.22512	2.12006	2.00718	1.89264	1.77082	1.64401	1.51712	1.38386	1.25022	1.22194	1.19842	1.17495	1.15584	1.13354	1.11474	1.09315	1.07375	1.05727	1.03748	1.01697	0.999246	0.980399	0.963083	0.943383	0.925821	0.906435	0.890396	0.871359	0.852882	0.836361	0.816844	0.799618	0.779168	0.762013	0.743497	0.724093	0.706716
0.566924	2.92364	2.91421	2.8945	2.86689	2.82867	2.78147	2.72699	2.66287	2.59033	2.51096	2.42412	2.32467	2.22503	2.11975	2.01057	1.89382	1.76813	1.64454	1.51886	1.38415	1.25061	1.22293	1.19824	1.17585	1.155	1.13432	1.1148	1.09448	1.07389	1.05733	1.03652	1.01813	0.997968	0.980098	0.963283	0.944858	0.925287	0.907059	0.889497	0.871466	0.853456	0.834522	0.817726	0.799025	0.778353	0.762766	0.742433	0.724004	0.705231
0.567822	2.92588	2.91514	2.89694	2.8679	2.82959	2.78403	2.72833	2.66283	2.59131	2.5153	2.4213	2.32919	2.22397	2.11924	2.01196	1.89155	1.772	1.64691	1.51419	1.3856	1.25053	1.22109	1.19986	1.1763	1.15529	1.133	1.1144	1.09455	1.07557	1.05541	1.03638	1.018	0.999246	0.981543	0.962425	0.943878	0.924953	0.906202	0.889398	0.871183	0.853464	0.835339	0.817139	0.798741	0.780163	0.761528	0.742752	0.723852	0.704132
0.568727	2.9279	2.91742	2.89694	2.87152	2.83089	2.78372	2.72611	2.66272	2.59473	2.51302	2.42334	2.33172	2.22789	2.12289	2.00734	1.89044	1.77428	1.64639	1.5163	1.38617	1.25133	1.22211	1.19986	1.1769	1.15446	1.13375	1.11352	1.09523	1.07591	1.05539	1.03674	1.01762	0.99861	0.980994	0.962914	0.944082	0.925215	0.90751	0.888626	0.870947	0.853169	0.8352	0.817229	0.79839	0.781112	0.760605	0.74035	0.723302	0.704831
0.569613	2.92849	2.91836	2.89881	2.86919	2.83211	0.0557284	2.72851	2.66237	2.5958	2.51382	2.42203	2.33119	2.23163	2.1236	2.00819	1.89336	1.77118	1.64633	1.51778	1.38658	1.25167	1.223	1.19878	1.17532	1.15393	1.13451	1.11545	1.09549	1.0744	1.05528	1.03633	1.01791	0.999255	0.98035	0.961919	0.943925	0.925587	0.90843	0.888187	0.870972	0.852895	0.834497	0.817443	0.798113	0.778373	0.762737	0.742297	0.722047	0.704753
0.570502	2.92941	2.91871	2.90069	2.87144	2.83387	2.7868	2.72704	2.66566	2.59552	2.51456	0.0242535	2.33065	0.044624	2.12345	2.01242	1.89294	1.77257	1.64531	1.51998	1.38381	1.25176	1.22406	1.19627	1.17615	1.15656	1.13449	1.11428	1.09617	1.07552	1.05517	1.03552	1.01781	0.998963	0.97977	0.0192722	0.942986	0.923661	0.908827	0.889231	0.871161	0.853332	0.834865	0.816658	0.797275	0.77948	0.760774	0.741623	0.723054	0.706652
0.571405	2.92972	2.92204	2.90141	2.87365	2.83412	2.78676	2.73158	0.0533289	2.59949	2.51447	2.42801	2.33036	2.22897	2.12643	2.01369	1.89201	1.77265	1.64854	1.51813	1.38422	1.25155	1.22324	1.19732	1.17837	0.0230735	1.13511	1.11529	1.09499	1.07582	1.05534	1.03682	1.01507	0.999305	0.980453	0.964318	0.942721	0.925261	0.907059	0.888921	0.870068	0.852669	0.835552	0.816648	0.0159632	0.777924	0.761239	0.741208	0.722723	0.70501
0.572314	2.931	2.92303	2.90351	2.87141	2.83606	0.0557681	2.73282	2.66765	2.59539	2.51595	2.42736	2.33374	2.2326	2.12353	2.01386	1.89404	1.77	1.64892	1.52175	1.38447	1.25154	1.22251	1.19811	1.1772	1.1552	1.13452	1.11404	1.0961	1.07652	1.05471	1.0365	1.01624	0.999708	0.979878	0.962454	0.943894	0.925051	0.906842	0.887843	0.870287	0.854281	0.834211	0.817153	0.798979	0.777985	0.759851	0.7413	0.722302	0.704797
0.573237	2.93179	2.92272	2.90274	2.8751	2.83637	2.78752	2.7331	2.66709	2.59826	2.51259	2.42814	2.33548	2.23173	2.12804	2.0145	1.89288	1.77446	1.64717	1.51917	1.38644	1.25124	1.22487	1.19869	1.17753	1.15508	1.13479	1.11532	1.09389	1.07613	1.057	1.03455	1.01812	0.999306	0.979978	0.962063	0.944168	0.92499	0.905759	0.88975	0.871209	0.853297	0.834178	0.815674	0.798128	0.778944	0.760139	0.740699	0.72206	0.705693
0.574172	2.9349	2.9237	2.9065	2.8778	2.83867	2.78765	2.73489	2.66901	2.59814	2.5121	2.43095	2.33215	2.23153	2.12955	2.01409	1.8937	1.77376	1.64811	1.52179	1.38742	1.25124	1.22463	1.19872	1.17721	1.15479	1.13463	1.11449	1.09394	1.07527	1.05819	1.03577	1.01762	0.998461	0.979508	0.963727	0.943392	0.018484	0.907465	0.889181	0.87047	0.852644	0.834277	0.816463	0.0159275	0.778263	0.760157	0.741656	0.7234	0.704885
0.575082	2.93594	2.92494	0.0581422	2.87748	2.84132	2.78937	2.73267	2.67287	0.051921	2.51527	2.4322	2.33517	2.23483	2.12625	2.01552	1.89433	1.77314	1.65481	1.51746	1.3887	1.25146	1.22482	1.19889	1.17698	1.15635	1.13449	1.11299	1.09582	1.07559	1.05544	1.03645	1.01892	0.998119	0.979435	0.962958	0.944609	0.923533	0.908142	0.889019	0.870046	0.852307	0.833402	0.815384	0.797293	0.779123	0.76085	0.74081	0.722625	0.705383
0.57599	2.93608	2.92652	2.90928	2.8784	2.8425	2.79302	2.73593	2.67072	2.59642	2.52112	2.43079	2.33383	2.235	2.12715	2.01416	1.89581	1.77783	1.65103	1.51641	1.3844	1.25229	1.22156	1.20049	1.17776	1.15483	1.13457	1.1149	1.09536	1.07531	1.05505	1.03799	1.01861	0.998149	0.980541	0.960671	0.941992	0.925486	0.908583	0.888338	0.870132	0.853242	0.834121	0.814556	0.79526	0.777769	0.760955	0.74133	0.723335	0.704902
0.576877	2.93725	2.92873	2.9084	2.87918	2.84166	2.79538	2.73688	2.67144	0.0520414	2.51783	2.42958	2.33668	2.23338	2.12915	2.01346	1.89804	1.77747	1.65052	1.51751	1.38341	1.25205	1.22499	0.0240069	1.17659	1.15535	1.13508	1.11487	1.09524	1.0748	1.05717	1.03596	1.01807	1.00052	0.0196018	0.960175	0.942347	0.925137	0.906698	0.0177929	0.87102	0.851913	0.833671	0.815177	0.795019	0.777125	0.760029	0.742236	0.723226	0.704552
0.577766	2.93885	2.93043	2.91054	2.88151	2.84213	2.79445	2.74174	2.67152	2.60023	2.5174	2.43296	2.3342	2.23747	2.13069	2.01282	1.89907	1.77664	1.64935	1.518	1.38758	1.2516	1.22519	1.19815	1.17686	1.15603	1.13667	0.022271	1.09617	1.07531	1.05751	1.0372	1.0164	0.999496	0.97945	0.961915	0.942319	0.924347	0.907709	0.889107	0.870325	0.851782	0.83305	0.814924	0.796164	0.776204	0.759954	0.74186	0.723293	0.705018
0.578677	2.94011	2.93164	2.9126	2.88303	2.84282	2.79723	2.73959	2.67482	2.59958	2.52044	2.42967	2.33916	2.23396	2.12835	2.01824	1.8997	1.77688	1.65126	1.51545	1.38885	1.25165	1.22378	1.19888	1.17719	1.15575	1.13582	1.11516	1.09558	1.07712	1.05666	1.03693	1.01745	0.998026	0.980867	0.960275	0.943592	0.925858	0.906851	0.888097	0.870951	0.851086	0.832559	0.81472	0.795458	0.777154	0.759359	0.742605	0.723782	0.70357
0.579583	2.9422	2.93143	2.91237	2.88402	2.84814	2.79611	2.73954	2.67794	2.59999	2.5213	2.42999	2.33806	2.23767	2.12802	2.01647	1.90139	1.77814	1.64934	1.51917	1.38565	1.25182	1.22427	0.0239764	1.17608	1.15819	1.13524	1.1157	1.09476	1.07644	1.05644	1.03682	1.01802	0.998611	0.981454	0.962275	0.941658	0.925192	0.907311	0.887814	0.869776	0.851078	0.833352	0.813065	0.79514	0.77788	0.760849	0.740906	0.724099	0.702105
0.580518	2.94318	0.0586384	2.91279	2.88507	2.84366	2.79759	2.74236	2.67647	2.60408	2.52017	2.43212	2.33735	2.23759	2.1313	2.01628	1.89966	1.77659	1.65126	1.51592	1.38949	1.25191	1.22465	1.20042	1.17674	1.15627	1.13654	1.11676	1.09461	1.07527	1.05717	1.03663	1.01772	1.00005	0.979332	0.961634	0.941611	0.0185199	0.906996	0.888644	0.870406	0.851074	0.830802	0.815574	0.795794	0.777752	0.759231	0.741745	0.722467	0.703373
0.581427	2.94389	2.93336	2.91343	2.88538	2.84684	2.79771	2.74403	2.67776	2.60562	0.0503959	2.43414	2.33771	2.23927	2.13144	2.01635	1.89722	1.78005	1.65127	1.51942	1.38755	1.25189	1.2252	1.20083	1.17548	1.1564	1.13645	1.11491	1.0975	1.07555	1.05542	1.03631	1.0193	0.999969	0.979388	0.962913	0.942201	0.924752	0.906465	0.890277	0.868048	0.851988	0.831872	0.813647	0.796343	0.776877	0.760784	0.740391	0.722618	0.701866
0.582328	2.94541	2.93342	2.91598	2.88703	2.84542	2.79869	2.74563	2.67835	2.60445	2.5249	2.43439	2.33927	2.24079	2.12862	2.01903	1.90053	1.77643	1.65101	1.52179	1.38988	1.25124	1.22631	1.2007	1.17723	1.15635	1.13494	1.11635	1.09595	1.07656	1.0564	1.03655	1.0179	0.999768	0.98063	0.961133	0.943835	0.924655	0.907655	0.887599	0.869751	0.851223	0.831521	0.814569	0.794957	0.777506	0.758165	0.740785	0.722797	0.703234
0.583221	2.94362	2.93496	2.91729	0.0577355	2.8448	2.79884	2.7466	2.67949	2.60858	2.52331	2.43783	2.34238	2.23776	2.13304	2.0157	1.90017	1.77921	1.65175	1.52354	1.38534	1.25222	1.22417	1.20119	1.17683	0.0231466	1.13589	1.11544	1.09626	1.07459	1.0573	1.03721	1.01899	0.998309	0.981088	0.962068	0.943108	0.925392	0.907411	0.887584	0.869703	0.851049	0.831815	0.813168	0.795519	0.777057	0.0151307	0.741519	0.722591	0.701776
0.584099	2.94634	2.93693	2.91685	2.88693	2.84891	2.80044	2.74501	2.68246	2.60917	2.52709	2.4373	2.34129	2.24042	2.13588	2.01927	1.89922	1.78002	1.65357	1.52068	1.38651	1.25158	1.2247	1.20201	1.17797	1.15706	1.13502	1.11467	1.09611	1.07463	1.05756	1.03647	1.02	0.998298	0.980651	0.961511	0.944215	0.924792	0.906851	0.888352	0.869488	0.850509	0.832069	0.813152	0.794972	0.776818	0.758001	0.0148145	0.720337	0.703337
0.585012	2.94691	0.0587208	2.91883	2.88733	2.84788	2.80591	2.74693	2.68186	2.60956	2.52756	2.4397	2.34259	2.24201	2.12982	2.02152	1.90077	1.77904	1.6516	1.52364	1.38889	1.25206	1.22638	1.20096	1.17839	1.15725	1.13505	1.11779	1.09464	1.07526	1.05604	1.03627	1.01876	1.00082	0.979464	0.962307	0.94347	0.924712	0.905589	0.889066	0.869205	0.851086	0.83184	0.813713	0.794942	0.776129	0.756943	0.74057	0.72144	0.702114
0.585916	2.94682	2.93711	2.91894	0.0577995	2.85085	2.80614	2.74738	2.68486	2.60741	2.5275	2.44116	2.34506	2.24117	2.13133	2.01982	1.90203	1.77909	1.65207	1.522	1.38719	1.25189	1.22548	1.20178	1.17768	1.15793	1.1356	1.11619	1.09611	1.07569	1.05553	1.03729	1.01874	0.998994	0.980299	0.963083	0.943688	0.92463	0.905254	0.889677	0.868686	0.849894	0.832281	0.812589	0.795186	0.776233	0.758601	0.739688	0.720228	0.703094
0.586809	2.94817	2.93976	2.91935	2.89012	2.85178	2.80651	2.74915	0.0537014	2.60729	2.52907	2.44019	2.34605	2.24229	2.13274	2.02181	1.90058	1.78052	1.65369	1.52201	1.38716	1.25191	1.22447	1.20063	1.17899	1.15788	1.13578	1.11602	1.09571	1.07568	1.05452	1.03738	1.01723	0.999808	0.980598	0.963044	0.943096	0.925182	0.906156	0.887928	0.868717	0.849969	0.832003	0.813477	0.795686	0.77568	0.757882	0.739202	0.72104	0.701897
0.587718	2.9487	2.94003	2.9198	2.88918	2.85245	2.80649	2.74834	2.6869	2.61047	2.53079	0.0488005	2.34538	2.24436	2.1334	2.01894	1.90092	1.78126	1.65409	1.52229	1.38835	1.25197	1.22584	1.19967	1.17918	1.15808	1.1358	1.11543	1.09506	1.07492	1.05654	1.036	1.01841	0.999818	0.980759	0.962492	0.942781	0.924132	0.907059	0.887742	0.868837	0.850824	0.83045	0.81477	0.795234	0.775201	0.757964	0.738879	0.719456	0.701364
0.588624	2.95044	2.9398	2.91994	2.89192	2.85474	2.80463	2.75158	2.6861	2.61135	2.52934	2.44238	2.34757	2.24323	2.13089	2.0234	1.90291	0.0355825	1.65392	1.52204	0.0277607	1.25229	1.22519	1.20186	1.17946	1.15783	1.13594	1.11533	1.09673	1.07392	1.05584	1.03699	1.01957	0.998993	0.980189	0.961745	0.944667	0.924169	0.904489	0.888708	0.867853	0.850174	0.830386	0.814887	0.796022	0.776826	0.756952	0.737963	0.720117	0.700758
0.589554	2.95131	2.9427	2.92075	2.89393	2.85292	2.80746	2.75258	2.68486	2.61325	2.52833	2.44539	2.34679	2.24345	2.13327	2.02354	1.90366	1.78132	1.65256	1.52139	1.38744	1.25237	1.22472	1.20035	1.17997	1.15865	1.13578	1.1154	1.09551	1.07471	1.05771	1.03718	1.01787	0.998379	0.980267	0.963154	0.943617	0.923832	0.906806	0.88461	0.869226	0.849644	0.831546	0.813771	0.795391	0.776054	0.758412	0.738664	0.718773	0.702736
0.590499	2.95338	0.058866	2.92183	0.0578848	2.85642	2.80748	2.75432	2.68757	2.61268	2.53079	2.44458	2.34852	2.2463	2.13483	2.02305	1.90202	1.78311	1.6542	1.52043	1.38871	1.25201	1.22515	1.20082	1.17757	1.15911	1.13697	1.115	1.09592	1.07591	1.05604	1.03736	1.01724	0.999285	0.980539	0.962015	0.943698	0.924839	0.904759	0.886528	0.868001	0.849887	0.831562	0.813951	0.795386	0.77618	0.758455	0.736278	0.720414	0.701452
0.591399	2.95486	2.94523	2.92319	2.89593	2.85688	2.81089	2.75332	2.68537	2.61506	2.53103	2.44623	2.34782	2.24392	2.13903	2.02324	1.90344	1.78245	1.65122	1.52583	1.38936	1.25189	1.22465	1.2018	1.17821	1.15792	1.13689	1.11589	1.09464	1.0756	1.05671	1.03829	1.01801	0.998661	0.980514	0.962902	0.941583	0.923958	0.906472	0.886403	0.86803	0.850034	0.832323	0.813078	0.794133	0.776188	0.757232	0.739212	0.719607	0.701033
0.592297	2.95689	2.94635	2.92528	0.0579389	2.85704	0.0562334	2.75569	2.68776	2.61649	2.53227	2.44427	2.35152	2.24524	2.13481	2.02361	1.90561	1.78127	1.65125	1.52351	1.39275	1.25198	1.22661	1.2007	1.17745	1.15733	1.13735	1.11528	1.09661	1.07577	1.05666	1.03726	1.01878	0.998863	0.978417	0.962606	0.943339	0.923607	0.905941	0.88743	0.867545	0.849354	0.83319	0.812174	0.793566	0.776794	0.757581	0.738729	0.719911	0.700177
0.593178	2.95719	2.9466	2.92783	2.89879	2.86097	2.81113	2.75686	2.68919	2.6171	2.53184	2.44372	0.0469799	2.24399	2.137	2.02338	1.9047	1.78352	1.65272	1.52195	1.39179	0.0250365	1.22593	1.20079	1.17819	1.15792	1.13618	1.1162	1.09704	1.07544	1.05614	1.03749	1.01814	0.999296	0.978923	0.961042	0.944458	0.92367	0.906599	0.887014	0.866329	0.849867	0.831456	0.813128	0.794534	0.774317	0.757613	0.73971	0.720055	0.699812
0.594106	2.95741	2.94802	2.92843	2.9004	2.86052	2.81337	2.75652	2.69359	2.61681	2.5325	2.44432	2.34748	2.2471	2.13654	2.02282	1.90416	1.7826	1.65478	1.52304	1.38963	1.25348	1.22564	1.20025	1.17949	1.1577	1.13661	1.11593	1.09525	1.07635	1.05763	1.03762	1.01882	0.999094	0.97979	0.960027	0.94341	0.924575	0.905399	0.888097	0.867606	0.848093	0.8314	0.813782	0.793643	0.775792	0.756264	0.738793	0.721033	0.699564
0.595003	2.95958	2.94974	2.92843	2.9011	2.86313	2.81336	2.75808	2.69214	2.61778	2.53667	2.44645	2.34677	0.0449134	0.0428025	2.0259	1.90532	1.78201	1.65306	1.52215	1.38785	1.25304	1.22677	1.20103	1.17907	1.15774	1.13743	1.11558	1.09602	1.07576	1.05772	1.03727	1.0186	0.999154	0.979638	0.959575	0.942512	0.926068	0.0181286	0.886639	0.867829	0.849395	0.831203	0.813551	0.0158329	0.776084	0.756203	0.738844	0.719979	0.69996
0.595888	2.95886	2.94886	0.0585748	2.90319	2.86498	2.81122	2.7582	2.69278	0.0523595	2.53514	2.44852	2.34888	2.24869	2.13939	2.02423	1.90954	1.78105	1.65621	1.52151	1.38786	1.25312	1.22673	0.0240249	1.17831	1.15879	1.1364	1.11656	1.09548	1.07731	1.05724	1.03688	1.0169	0.998904	0.979699	0.96192	0.942123	0.924358	0.906951	0.886464	0.868038	0.850591	0.830851	0.812108	0.793353	0.773974	0.757236	0.738192	0.719517	0.699483
0.596782	2.95984	2.95089	2.93267	2.90331	2.86459	2.81293	2.75833	2.69371	2.62305	2.53489	2.44637	2.35016	2.24748	2.1413	2.02599	1.90973	1.78494	1.65364	1.52441	1.38781	1.25332	0.0245029	1.20182	1.18006	1.15832	1.13755	1.11612	1.09553	1.07648	1.05677	1.03743	1.01788	0.998531	0.97944	0.96149	0.942279	0.92377	0.906626	0.886898	0.869231	0.849414	0.830566	0.810995	0.793689	0.774804	0.756315	0.737802	0.720165	0.699691
0.597685	2.9618	2.95361	2.93418	2.90462	2.8643	2.81567	2.76241	2.69335	2.62094	2.53821	2.44921	2.34844	2.24753	2.14154	2.02808	1.91	1.78268	1.65606	1.5199	1.38987	1.25398	1.22634	1.20079	1.17947	1.15602	1.13758	1.11717	1.097	1.0774	1.05678	1.03725	1.01658	0.998611	0.981256	0.960728	0.941901	0.924728	0.907212	0.886033	0.866562	0.849165	0.831628	0.812685	0.792647	0.0154892	0.755925	0.738163	0.717967	0.700709
0.598588	2.96477	2.95489	2.93371	2.90443	2.86542	2.8189	2.76207	2.69441	2.62064	2.53951	2.44785	2.35287	2.25112	2.14144	2.02486	1.91209	1.78276	1.65412	1.5239	1.3903	1.25327	1.22624	1.20185	1.1786	1.15588	1.1364	1.11834	1.09758	1.07644	1.05771	1.03691	1.01665	0.999235	0.980933	0.96181	0.941886	0.923614	0.906111	0.886153	0.868064	0.849691	0.829797	0.812029	0.794434	0.774572	0.754996	0.738149	0.71734	0.70038
0.599494	2.96644	2.95628	2.93554	2.90636	2.86712	2.81968	2.76229	2.69469	2.6223	2.53777	2.45067	2.35293	2.25325	2.14102	2.02757	1.90714	1.78523	1.65433	1.52468	1.38952	1.2536	1.22597	1.20169	1.17994	1.15624	1.13795	1.11772	1.09597	1.07818	1.05712	1.03555	1.01853	0.999104	0.980213	0.962691	0.94207	0.923046	0.90584	0.886933	0.867327	0.848773	0.830174	0.812018	0.79372	0.774609	0.756189	0.736472	0.717747	0.700351
0.600388	2.96719	2.95532	2.9374	2.90689	2.87008	2.82104	2.76234	2.69564	0.0524183	2.5414	2.45007	2.35573	2.25068	2.14024	2.02383	1.90948	1.78542	1.65301	1.52467	1.39136	1.25386	1.22686	1.20195	1.18026	1.15722	1.13864	1.11573	1.09736	1.07571	1.05912	1.03622	1.0193	0.997988	0.98061	0.961543	0.941471	0.923437	0.905553	0.886918	0.867992	0.848732	0.829348	0.812055	0.794041	0.774774	0.754651	0.736347	0.718628	0.70053
0.601297	2.96749	2.95605	2.93627	2.91014	2.87081	2.82128	2.76348	2.69589	2.62406	2.54269	2.45048	0.0470643	2.25033	2.13896	2.02584	1.90934	1.7838	1.65559	1.52489	1.39225	1.25493	1.2254	1.20274	1.17955	1.1581	1.13662	1.11848	1.09658	1.07627	1.05768	1.0376	1.01853	0.997916	0.980394	0.960352	0.941066	0.923481	0.90613	0.888248	0.866554	0.849156	0.830034	0.811868	0.793507	0.77333	0.754966	0.736963	0.719104	0.698546
0.6022	2.9683	2.95775	2.93658	2.90861	2.87105	2.82608	2.76412	2.69828	2.62424	2.53927	2.4529	2.35335	2.24937	2.14446	2.02472	0.0381943	1.78297	1.65415	1.52844	1.38756	1.25503	0.0245184	1.20216	1.18052	1.15809	1.13742	1.11642	1.09831	1.07585	1.05811	1.0384	1.01857	0.998249	0.978546	0.959795	0.943186	0.923479	0.904958	0.885195	0.868219	0.849354	0.831195	0.811836	0.79267	0.77357	0.755733	0.736604	0.716837	0.699897
0.603098	2.96873	2.95966	2.9394	2.90905	2.87089	2.82568	2.76376	2.69832	2.62445	2.54358	2.45327	2.35552	2.24984	2.14237	2.02871	1.90749	1.78357	1.65783	1.52728	1.39249	1.25469	1.22578	1.20272	1.17982	1.15891	1.13733	1.11868	1.09512	1.07839	1.05853	1.03639	1.0172	0.999589	0.978563	0.95989	0.941589	0.924292	0.905336	0.884788	0.868468	0.0169903	0.830819	0.811278	0.792318	0.773442	0.755616	0.737335	0.716707	0.699282
0.604011	2.96925	2.9603	2.93997	2.91281	2.87336	2.82332	2.76679	2.6986	2.62388	2.54433	0.04908	2.35503	2.25235	2.14241	2.02844	1.90638	1.78741	1.65736	1.52479	1.39354	1.2552	1.2269	1.2016	1.18194	1.15803	1.13709	1.11842	1.09687	1.07626	1.05806	1.03877	1.01701	0.997926	0.979425	0.959627	0.941742	0.925524	0.904941	0.886362	0.866533	0.848017	0.831595	0.811984	0.791607	0.773472	0.755093	0.735872	0.718257	0.698564
0.604921	2.96999	2.9608	2.94078	2.91232	0.057526	2.82511	2.76857	2.6979	2.62489	2.54335	2.45197	2.3559	2.25365	2.14706	2.02801	1.90916	1.78558	1.65637	1.52407	1.39416	1.25499	1.22844	1.20117	1.17959	1.15936	1.13829	1.11801	1.09637	1.07862	1.056	1.03763	1.01851	0.997483	0.979711	0.959966	0.942372	0.923587	0.905156	0.886534	0.867766	0.849092	0.829093	0.811399	0.792136	0.0154669	0.754972	0.736047	0.718105	0.698919
0.605826	2.97003	2.96223	2.94228	2.9153	2.8725	2.82684	2.76817	2.70039	2.62597	2.54204	2.45275	2.35652	2.25631	2.14545	2.03039	1.90888	1.78894	1.65729	1.52611	1.39144	1.25475	1.22772	1.20315	1.18103	1.15861	1.1362	1.11852	1.09733	1.07735	1.05663	1.03776	1.01812	0.999184	0.978799	0.959989	0.942453	0.922801	0.905166	0.885716	0.868211	0.847576	0.829519	0.811186	0.792051	0.77476	0.755881	0.734806	0.717981	0.697183
0.606731	2.9719	2.96343	2.94177	2.91444	2.87537	2.82639	2.76637	2.69983	2.62784	2.54206	2.45337	2.35789	2.25763	2.14292	2.0315	1.91215	1.78618	0.0331884	1.52536	1.39128	0.0250897	1.22656	1.2035	1.18008	1.15813	1.13758	1.11799	1.09733	1.07748	1.05709	1.03812	1.01715	0.999085	0.979457	0.959689	0.942958	0.924204	0.904418	0.886371	0.865354	0.848485	0.830124	0.811873	0.792118	0.77363	0.753558	0.73524	0.717953	0.698922
0.607656	2.9738	2.96503	2.94045	2.91603	2.87402	2.82734	2.76673	2.70447	2.62604	2.54274	2.45557	2.35919	2.25192	2.14684	2.03058	1.91311	1.78708	1.657	1.52621	1.39474	1.25428	1.22812	1.20094	1.18027	1.15897	1.13672	1.11769	1.09847	1.07819	1.05788	1.03538	1.018	0.999909	0.979929	0.96028	0.94299	0.923055	0.906401	0.884174	0.864582	0.849224	0.829642	0.8121	0.792344	0.771714	0.755049	0.736365	0.716231	0.69896
0.608565	2.97507	2.96494	2.94334	2.91454	2.87517	2.82678	0.055433	2.7031	2.63043	2.54456	2.45266	2.35835	2.25852	0.042855	2.03085	1.91064	1.7874	1.66008	1.53033	1.39181	1.25489	1.22759	1.20222	1.18031	1.15815	1.13845	1.11901	1.09692	1.07692	1.05668	1.03733	1.01846	0.0199976	0.979557	0.0192342	0.942516	0.922403	0.905147	0.883519	0.866336	0.848622	0.0166053	0.0162349	0.790724	0.77217	0.754486	0.735714	0.717154	0.697328
0.609498	2.97433	2.96465	2.94557	2.91564	2.87608	2.82668	2.77236	2.70252	2.6316	2.54641	2.4571	2.35922	2.25504	2.14595	2.03113	0.0382336	1.78655	1.65974	1.52818	1.39364	1.2558	1.22614	1.20346	1.17951	1.15992	1.13909	1.11749	1.09694	1.07672	1.05716	1.03795	1.01758	1.00039	0.980537	0.959984	0.942581	0.922195	0.905272	0.885457	0.865586	0.847091	0.830034	0.810506	0.791579	0.772896	0.754632	0.735325	0.717209	0.696417
0.610396	2.97482	2.96515	2.94763	2.91782	2.87701	0.0565604	2.77191	2.70541	2.62968	2.54746	2.45927	2.36048	2.25624	2.14898	2.02718	1.91114	1.78914	1.65849	1.52876	0.027856	1.25556	1.22682	1.20225	1.18106	1.16083	1.13696	1.11829	1.09728	1.07592	1.05697	1.03763	1.01935	0.998622	0.979508	0.961781	0.941814	0.923063	0.904841	0.884436	0.0173482	0.847354	0.82884	0.810528	0.789726	0.773719	0.754627	0.734712	0.0143394	0.698021
0.611306	2.97545	2.96636	2.94637	2.91776	2.87995	2.82875	2.77441	2.70207	2.62987	2.54628	2.46144	2.35977	2.25632	2.14699	2.02775	1.91598	1.78608	1.65984	1.52703	1.39488	1.2563	1.22587	1.20323	1.18184	1.15886	1.13929	1.11602	1.09684	1.07696	1.05761	1.03767	1.01973	0.998964	0.978664	0.962421	0.941552	0.921371	0.904615	0.886022	0.866791	0.847098	0.828515	0.812444	0.789005	0.773076	0.0150862	0.734457	0.715976	0.698517
0.612226	2.9756	2.96654	2.94764	2.91798	2.87835	2.83314	2.7728	2.70235	2.63126	2.55052	2.45667	2.36178	2.25666	2.14632	2.02794	1.91323	1.79045	1.65973	1.52772	1.39693	1.25532	1.22761	1.20297	1.18245	1.15836	1.13782	1.1167	1.09768	1.0781	1.05799	1.03752	1.01832	0.999255	0.978551	0.961051	0.941477	0.923704	0.903992	0.885606	0.866448	0.84714	0.828711	0.811374	0.791926	0.771078	0.75307	0.734301	0.717389	0.697813
0.61315	2.97777	2.96781	2.94836	2.91913	2.8798	2.8319	2.77385	2.70533	2.63074	2.54903	2.46226	2.35953	2.25629	2.14678	2.03109	1.91655	1.78323	1.66135	1.53369	1.3909	1.25571	1.2271	1.20384	1.18125	1.16022	0.0227418	1.11652	1.09705	1.07865	1.05826	1.03833	1.01999	0.997363	0.979298	0.95947	0.943049	0.923209	0.903903	0.885684	0.0173338	0.84604	0.829438	0.810074	0.792131	0.770696	0.752983	0.734167	0.715921	0.698092
0.614062	2.98086	0.05941	2.94945	2.92218	2.87775	2.83465	2.77139	2.70806	2.63247	2.55114	2.46143	2.36628	2.2536	2.14763	2.03095	1.915	1.78435	1.66186	1.52785	1.39387	1.25696	1.22716	1.20417	1.18264	1.15809	1.13827	1.11721	1.09858	1.0774	1.05699	1.03869	1.01938	0.998229	0.978955	0.96068	0.943389	0.922636	0.904443	0.884733	0.865669	0.847287	0.829936	0.80919	0.789359	0.772567	0.753914	0.73383	0.715625	0.697672
0.61498	2.98108	0.0594221	2.95098	2.92158	2.88134	2.83504	2.77394	2.70945	2.63382	2.55132	2.46061	2.36294	2.25695	2.14949	2.03311	1.91182	1.7863	1.65874	1.52671	1.39666	1.25725	1.22753	1.20475	1.18211	1.159	1.13901	1.11816	1.09841	1.07774	1.05635	1.03744	0.0203436	0.999326	0.980421	0.961896	0.942303	0.923442	0.903606	0.884148	0.866089	0.847598	0.829282	0.809938	0.789634	0.771482	0.753012	0.735273	0.716307	0.69644
0.615912	2.98173	2.97286	2.95348	0.0584244	2.88185	2.83305	2.77539	2.71067	2.63426	2.55177	2.46229	2.36364	2.25704	0.0429949	2.03348	1.91534	0.0358031	1.6574	0.03055	1.39625	1.25779	1.22809	1.20475	1.18127	1.16086	1.13802	1.11683	1.09846	1.07729	1.05829	1.03666	1.01762	0.999487	0.97976	0.961166	0.942425	0.923189	0.904904	0.884436	0.864638	0.846574	0.828187	0.810321	0.791759	0.77339	0.752498	0.736021	0.714055	0.695784
0.616816	0.059677	2.97363	2.95442	2.92429	2.88106	2.83475	2.77705	2.71051	2.63602	2.54876	2.46009	2.36608	2.26086	2.14596	2.03354	1.91751	1.79142	1.66065	1.52785	1.39405	1.25749	1.22829	1.2047	1.18186	1.16065	1.13755	1.11843	1.09757	1.07837	1.05682	1.03701	1.01912	0.997546	0.981552	0.960985	0.94192	0.923432	0.905625	0.883796	0.865972	0.846025	0.82866	0.808537	0.791389	0.77324	0.75349	0.73421	0.714523	0.695041
0.617717	2.98466	2.97567	2.95528	2.92381	2.88368	2.83868	2.77556	2.71107	2.6338	2.55218	2.46074	2.36662	2.2621	2.15005	2.03493	1.91433	1.79068	0.0332225	1.52636	1.39725	1.25677	1.22872	1.20491	1.18154	0.0231964	1.13906	1.11712	1.09764	1.07843	1.05786	1.03751	1.01596	0.998641	0.982259	0.960361	0.944293	0.923607	0.903904	0.884805	0.863271	0.847122	0.0165534	0.810692	0.790127	0.771108	0.754251	0.735026	0.713283	0.696308
0.618634	2.98608	2.97692	2.95615	0.0585011	2.88578	2.83924	2.77456	0.0541888	2.63496	2.55068	2.46087	2.36826	2.2596	2.15081	2.03687	1.91638	1.7901	1.66139	1.52921	1.39457	1.25747	1.22728	1.20421	1.18289	1.16059	1.13828	1.11734	1.09738	1.07643	1.05979	1.03826	1.01593	0.999668	0.981063	0.961151	0.941876	0.922438	0.904102	0.884843	0.866288	0.846196	0.829104	0.808992	0.790137	0.771527	0.752867	0.734372	0.713138	0.0139193
0.619575	2.98807	2.9786	2.95737	2.92548	2.88578	2.83758	2.77462	2.71256	2.63451	2.55022	2.46397	2.36437	0.0452687	2.15219	2.03407	1.91737	0.0357706	1.66405	1.5299	1.3956	1.25789	1.2273	1.20404	1.18097	1.1602	1.13898	1.11799	1.10021	1.07713	1.05693	1.03815	1.01816	0.998872	0.980211	0.961099	0.940635	0.923694	0.90493	0.883607	0.86671	0.84732	0.826341	0.808944	0.792036	0.771033	0.752003	0.734106	0.71245	0.696881
0.620493	2.98803	2.97766	2.9572	2.92944	0.0577365	2.83541	2.78125	2.71118	2.63706	0.0510967	2.45998	2.36546	2.26194	2.15325	2.03487	1.91884	1.7891	1.66276	1.5323	1.39411	1.25771	1.22917	1.20474	1.18101	1.15991	1.13913	1.11963	1.09693	1.07758	1.0573	1.03863	1.01897	0.998289	0.978691	0.960937	0.943785	0.9225	0.904084	0.885469	0.865625	0.845443	0.826472	0.80972	0.790779	0.771961	0.753832	0.732467	0.713269	0.695383
0.621415	2.99045	2.97907	2.95929	2.93051	2.8882	2.83768	2.78311	2.71395	2.63447	2.55106	2.46398	2.36513	2.26216	2.15332	2.03747	1.91797	1.79451	1.66331	1.52581	0.027911	1.25854	1.22873	1.20451	1.18096	1.16121	1.1381	1.11973	1.09759	1.07811	1.0556	1.03796	1.01944	1.00051	0.979122	0.959789	0.942721	0.922991	0.902919	0.885332	0.864337	0.846935	0.826742	0.809233	0.790793	0.771737	0.0150536	0.733698	0.715205	0.695115
0.622333	2.98941	2.98064	2.96004	2.93137	2.8897	2.84055	2.78093	2.71427	2.63578	2.55347	2.46426	2.366	2.26278	2.15171	2.04109	1.9151	1.79136	1.66322	1.5303	1.39408	1.2583	1.22964	1.20565	1.18258	1.15937	1.13853	1.11895	1.09803	1.07658	1.0583	1.03759	1.01973	0.999487	0.979809	0.959965	0.941664	0.923334	0.903001	0.884383	0.86523	0.845268	0.827778	0.809539	0.790357	0.771362	0.752234	0.733603	0.713979	0.696398
0.623267	2.99083	0.0596266	2.96117	2.92905	2.89091	2.84117	2.77941	2.71476	2.63599	2.55781	2.46117	2.36821	2.26799	2.14895	2.03815	0.0383765	1.79249	1.66029	1.52884	1.39646	1.25809	1.22947	1.20469	1.18252	1.15911	1.13961	1.11743	1.09802	1.07802	1.05746	1.03788	1.01953	0.998983	0.981232	0.959712	0.941262	0.922401	0.904075	0.883427	0.864116	0.846804	0.828342	0.808337	0.790034	0.770951	0.752983	0.733908	0.713414	0.696011
0.62421	2.99139	2.98103	0.0591991	2.93104	2.88911	2.84236	2.78152	2.71186	2.63898	2.5564	2.46545	2.36863	2.26433	2.15517	2.03666	1.91993	1.7879	1.66107	1.53405	1.39721	1.25903	1.22826	1.20443	1.18138	1.15958	1.13989	1.11852	1.09792	1.07818	1.05805	1.03834	1.01788	0.999346	0.979618	0.96059	0.0188496	0.920503	0.903623	0.886004	0.864961	0.846843	0.827338	0.807786	0.787783	0.772051	0.754711	0.732346	0.713641	0.695824
0.625133	2.99319	2.98262	2.96098	2.93039	2.88884	2.84187	2.78479	2.71538	2.64004	2.55721	2.46807	2.36939	2.26627	2.15363	2.0389	1.9153	1.79468	1.66322	1.5273	1.39769	1.25922	1.22777	1.20701	1.18093	1.16068	1.13856	1.11819	1.09952	0.0215572	1.05709	1.03873	1.01981	1.00029	0.97776	0.961872	0.942054	0.920601	0.903011	0.883668	0.866349	0.846492	0.827623	0.807422	0.789093	0.77137	0.75267	0.732351	0.716204	0.694623
0.626035	2.99205	2.98223	2.96102	2.92916	2.89035	2.83921	2.78288	2.71958	2.64084	2.5599	2.46482	2.36875	2.26596	2.15635	2.04115	1.91611	1.79271	1.66605	1.52807	1.39884	1.2588	1.22927	1.20436	1.18241	1.1591	1.14022	1.11874	1.09793	1.07765	1.0593	1.03764	1.01904	0.998763	0.980595	0.959576	0.94028	0.923902	0.902261	0.884811	0.866184	0.845098	0.827575	0.807313	0.789734	0.769799	0.751594	0.734186	0.714502	0.696312
0.626958	2.9934	0.0596306	2.96003	2.93121	2.89142	2.84202	2.78396	2.71923	2.64356	2.55799	2.46797	2.36782	2.26709	2.15764	2.04333	1.91944	1.79058	1.66276	1.53387	1.39557	1.25957	1.22814	1.20523	1.18311	1.15931	1.13994	1.11914	1.09797	1.07773	1.05746	1.03817	1.02104	0.997514	0.981293	0.958531	0.940754	0.923351	0.902299	0.884881	0.865409	0.845729	0.827125	0.808627	0.786964	0.771557	0.752753	0.732488	0.714543	0.695648
0.627869	2.9942	2.98274	2.96302	2.93241	2.89038	2.8442	2.78418	2.72183	2.64177	2.55943	2.46905	2.37181	2.2643	2.1586	2.04169	1.92047	1.79128	1.6677	1.53046	1.39679	0.0251638	1.22916	1.20577	1.1843	1.16145	1.13953	1.11868	1.09806	1.0781	1.05739	1.03841	1.01837	1.00014	0.98015	0.958726	0.940804	0.922951	0.903146	0.883604	0.864575	0.847015	0.82522	0.808103	0.788645	0.771041	0.752823	0.733693	0.715618	0.693725
0.628802	2.99287	2.98429	2.96328	2.93213	2.89452	2.84461	2.78678	2.71956	2.64613	2.56116	2.47024	2.37268	2.265	2.15718	2.0406	1.91716	1.79772	1.66595	1.53029	1.3954	1.25957	1.22839	1.20673	1.18337	1.16188	1.13986	0.0223374	0.0219658	1.07758	1.05786	1.03816	1.0191	1.00008	0.979672	0.960732	0.940738	0.922321	0.902299	0.882717	0.864767	0.846042	0.826546	0.01617	0.789274	0.770113	0.751729	0.733127	0.714165	0.695695
0.629703	2.99466	2.98542	2.96304	2.93329	2.89418	2.84381	2.78809	0.0544139	2.64749	2.56386	2.46755	0.0474317	2.26744	2.15631	2.0415	0.0383636	1.79696	1.66447	1.53029	1.3957	1.25942	1.23004	1.20749	1.18316	1.16323	1.13846	1.11729	1.09826	1.07818	1.05705	1.03871	1.01805	0.998621	0.981102	0.96097	0.940838	0.922393	0.902308	0.883316	0.864427	0.846583	0.82537	0.809918	0.788684	0.771086	0.7505	0.731702	0.714613	0.694066
0.6306	2.99462	2.985	2.96223	2.93524	2.89777	0.0568954	0.0557133	2.72055	2.64798	2.5637	2.46968	2.3737	2.26831	2.15847	2.03866	1.92096	1.79751	1.66401	1.53041	1.39581	1.25934	1.22964	1.20757	1.18465	1.16102	1.1394	1.11871	1.09851	1.07854	1.05704	1.03791	1.01762	0.998833	0.980651	0.961523	0.940741	0.922501	0.904201	0.88226	0.864339	0.845821	0.825236	0.80858	0.789559	0.769919	0.75171	0.731714	0.711836	0.69468
0.631507	2.99463	2.9847	2.96677	2.93595	2.898	2.84939	2.7901	2.72208	2.64806	2.56393	0.0493876	2.37782	2.26565	2.15746	2.04254	1.91871	1.79552	1.66552	1.53185	1.39805	1.25976	1.22884	1.2053	1.18517	1.16107	1.1391	1.11888	1.09913	1.07722	1.05821	1.03727	1.01905	0.999225	0.980074	0.960914	0.0188327	0.922311	0.903173	0.883002	0.863572	0.845361	0.826069	0.807164	0.78941	0.769896	0.752115	0.733311	0.712456	0.693814
0.632423	2.99606	2.98527	2.9671	2.93785	2.90098	2.85132	0.0557704	2.72109	2.64749	2.56463	2.47645	2.37452	2.2695	2.15529	2.04722	1.91868	1.79367	1.66401	1.53442	1.39906	0.025186	1.22941	1.2066	1.18438	1.16038	1.14078	1.11918	1.09924	1.07832	1.05674	1.03716	1.01807	1.00112	0.979604	0.959193	0.943638	0.92128	0.902956	0.88274	0.864922	0.843837	0.827976	0.806186	0.789508	0.769889	0.751194	0.731705	0.713772	0.694063
0.633321	2.99792	2.98646	2.96852	2.93809	2.89892	2.85079	2.79267	2.72303	2.64726	2.56283	2.47247	2.37739	2.27119	0.0431305	2.04663	1.91697	1.79655	0.0333225	1.53538	1.39793	1.26008	1.22926	1.20562	1.18497	1.1606	1.14159	1.11991	1.09802	1.07759	1.05787	1.03852	1.01801	0.999577	0.979964	0.960189	0.941755	0.923911	0.901358	0.883552	0.863429	0.844868	0.824821	0.808976	0.789364	0.769306	0.750597	0.731804	0.713862	0.693874
0.634218	2.99914	2.98814	2.96878	2.94035	2.8988	2.85041	2.79347	2.72717	2.64513	2.56499	2.47614	2.37532	0.0227297	2.15952	2.04269	1.91872	1.79778	1.667	1.53626	1.39941	1.25946	1.22967	1.2057	1.18471	1.16176	1.14029	1.11886	1.09777	1.078	1.06017	1.03751	1.01875	0.999034	0.979472	0.960041	0.942777	0.921054	0.902958	0.883336	0.864339	0.843475	0.825344	0.0161448	0.789447	0.769799	0.751664	0.731459	0.713125	0.693562
0.635131	2.99915	2.98995	2.96975	2.94075	2.90198	2.85467	2.79227	2.72834	0.0530298	2.56306	2.47464	2.37647	2.27486	2.16082	2.04393	1.92059	1.79838	1.66785	1.53366	1.40098	1.26016	1.23077	1.20559	1.18335	1.16229	1.139	1.11883	1.09791	1.07767	1.05989	1.03845	1.01817	0.998723	0.979381	0.961429	0.94172	0.922058	0.901514	0.882743	0.864289	0.844187	0.824634	0.808396	0.787047	0.772155	0.750573	0.732412	0.713277	0.694063
0.636021	2.99949	2.99161	2.97048	2.9436	2.90338	2.85308	2.79648	2.72867	2.65065	2.56702	2.4745	2.37662	2.27565	2.16193	2.04592	1.92182	1.79647	1.6682	1.5356	1.39891	1.26032	1.23147	1.20756	1.18239	1.16134	1.14013	1.11898	1.09805	1.07816	1.05917	1.03938	1.01886	0.998269	0.979998	0.959707	0.941493	0.91996	0.901984	0.0176654	0.864024	0.845033	0.82573	0.80732	0.788248	0.770525	0.750098	0.731806	0.714178	0.694521
0.636927	3.00115	2.99134	2.97252	2.9449	2.90297	2.85427	2.79784	2.72707	2.6509	0.0513701	2.47583	2.37741	2.27469	2.1621	2.04637	1.92455	1.79451	1.66702	1.53301	1.40084	1.26157	1.22992	1.2063	1.1823	1.16072	1.1403	1.11981	1.09896	1.07834	1.05868	1.03774	1.02002	0.999668	0.978505	0.959322	0.941686	0.91958	0.903128	0.882335	0.864368	0.844556	0.826799	0.806804	0.7879	0.770151	0.749962	0.732133	0.712676	0.695326
0.637829	3.00301	2.99428	0.0594322	2.94313	2.9045	0.0571279	2.79672	2.72784	2.65201	2.5707	2.47913	2.38092	2.27372	2.16295	2.04316	1.92321	1.79992	1.66829	1.53566	1.39695	1.26125	1.23021	1.20676	1.18326	1.16017	1.14083	1.11972	1.09898	1.07812	1.05787	1.03814	1.01889	0.999911	0.978816	0.961477	0.94018	0.920574	0.901431	0.883487	0.865072	0.844491	0.824406	0.806123	0.788802	0.769208	0.750861	0.73182	0.712987	0.69476
0.638724	3.00309	2.99408	2.97483	2.94509	2.90408	0.0571855	2.7955	2.72876	2.65165	2.57038	2.47863	2.3779	2.27532	0.0432437	2.04621	1.92531	1.79718	1.6684	1.53305	1.40048	1.26135	1.23114	1.20652	1.18377	1.16029	1.14067	1.11969	1.09747	1.07799	1.05838	1.03842	1.01938	0.999537	0.97893	0.961028	0.940579	0.920194	0.902605	0.88395	0.863565	0.844983	0.825338	0.806979	0.788076	0.767571	0.750745	0.731713	0.71351	0.694487
0.639644	3.00773	2.99508	2.97551	2.94564	2.90646	2.85827	2.7989	2.72985	2.65529	2.57219	2.47892	2.37964	2.27233	2.16188	2.04341	1.92306	1.80127	1.66954	1.53312	1.40126	1.26029	1.23062	1.20798	1.18401	1.16206	1.14021	1.11804	1.09846	1.0777	1.05899	1.03816	1.01939	0.99837	0.981104	0.959194	0.93984	0.920765	0.901063	0.884041	0.864186	0.845532	0.824631	0.807922	0.786569	0.769246	0.750527	0.732518	0.712752	0.695231
0.640555	3.00742	2.9967	2.97525	2.94542	2.90911	2.8578	2.80072	2.72841	2.65501	2.57065	2.48091	2.37903	2.27308	2.16034	2.04855	1.92394	1.79978	1.66912	1.53207	1.40192	1.26198	1.23038	1.20698	1.18427	1.16091	1.14017	1.11775	1.09874	1.07751	1.05916	1.03965	1.01971	0.997926	0.97964	0.959871	0.939151	0.920547	0.902649	0.883563	0.863834	0.843794	0.826873	0.806608	0.789251	0.768729	0.750915	0.730674	0.711705	0.693632
0.641469	3.00661	2.99628	0.0595544	2.94804	2.90846	2.85811	2.80106	2.72989	2.65509	2.57294	2.47618	2.3794	2.27425	2.16282	2.04914	1.92414	1.80088	1.66869	1.53312	1.40416	1.26144	1.23017	1.20825	1.18357	1.16064	1.13986	1.11874	1.09884	1.07897	1.05738	1.03819	1.01999	0.999417	0.979151	0.959871	0.940124	0.921143	0.902209	0.882347	0.864635	0.843899	0.826464	0.807067	0.788538	0.769379	0.749014	0.731811	0.710521	0.69281
0.64239	3.00753	2.99797	2.97822	2.94881	2.90971	2.859	2.79975	2.7354	2.65434	2.57058	2.47864	2.38107	2.27793	2.16273	2.04692	1.92738	1.80019	1.66917	1.53748	1.40075	1.26145	1.2317	1.20774	1.184	1.16069	1.13944	1.12023	1.09897	1.07808	1.05787	1.03856	1.01829	0.998721	0.97992	0.959227	0.941558	0.920845	0.901542	0.883348	0.863739	0.84295	0.826814	0.807427	0.7898	0.768265	0.74994	0.73079	0.709907	0.693745
0.643286	3.0079	2.99874	2.97982	2.94924	2.91067	2.85807	2.80153	2.73442	2.65657	2.57041	2.48013	2.38106	2.27263	2.1659	2.04974	1.92443	1.80275	1.6709	1.53661	1.40095	1.2617	1.23108	1.20822	1.18408	0.0232302	1.13983	1.11924	1.10047	1.07848	1.05811	1.03762	1.01905	0.997715	0.979087	0.960662	0.939307	0.92241	0.901469	0.881771	0.864001	0.845188	0.825139	0.807567	0.788322	0.768184	0.749567	0.731301	0.711429	0.69266
0.644211	3.00681	0.0599987	2.979	2.95037	2.91039	2.86135	2.80126	2.73467	2.65723	2.57205	2.48091	2.3797	2.27732	2.16307	2.04909	1.92775	1.80359	1.67136	1.5374	1.40131	1.26233	1.23064	1.20813	1.18367	1.16185	1.14064	1.1191	1.09953	1.07922	1.0583	1.03817	0.0204072	0.997584	0.978808	0.958121	0.0188118	0.922881	0.901045	0.882554	0.863208	0.843556	0.0165309	0.806433	0.787714	0.768692	0.750076	0.0145908	0.712002	0.694511
0.645151	3.00945	2.99961	2.98013	2.95172	2.91186	2.85845	2.80226	2.73379	2.66134	2.57396	2.48187	2.38192	2.27802	2.1645	2.0474	1.93154	1.79962	1.6691	1.53516	1.40372	1.26123	1.23245	1.20753	1.18606	1.16162	1.14189	1.11926	1.09726	1.07883	1.05761	1.03986	1.01929	0.998702	0.978307	0.958932	0.940277	0.921652	0.901659	0.882694	0.863866	0.843442	0.825305	0.807137	0.787714	0.769201	0.749586	0.730561	0.711886	0.694229
0.646071	3.01057	3.00161	2.9822	0.0590173	2.9104	2.86188	2.80297	2.73855	2.65849	2.57326	2.48311	2.38427	2.27694	2.1716	2.04655	1.92928	1.80274	1.66847	1.53393	1.40265	1.26098	1.23284	1.20871	1.1852	1.16042	1.14064	1.12046	1.09792	1.07872	1.05942	1.03775	1.01982	0.998622	0.980544	0.958303	0.938091	0.920891	0.903361	0.880931	0.863316	0.845064	0.824519	0.806162	0.789883	0.768347	0.749606	0.730867	0.711465	0.694043
0.646977	3.01218	3.00207	2.98365	2.9518	2.9125	2.86299	2.804	2.74043	2.65757	2.57513	2.48261	2.38297	2.28058	2.16995	2.04866	1.92886	1.80257	1.66895	1.53475	1.40062	1.26195	1.23222	1.20742	1.18537	1.16304	1.13971	1.11959	1.09875	1.07929	1.05862	1.03918	1.01823	0.998963	0.98011	0.958083	0.940688	0.919895	0.900767	0.882847	0.863085	0.845285	0.824631	0.807261	0.786414	0.770053	0.749096	0.730914	0.712257	0.69141
0.64788	3.01397	3.00456	2.98403	2.95181	2.91194	2.86334	2.80565	0.0547958	2.65854	2.57418	2.4864	2.383	2.27998	2.17105	2.05227	1.92717	1.79922	1.67081	1.53842	1.39806	1.26117	1.23265	1.20803	1.18464	1.16133	1.14113	1.11934	0.0219758	1.07973	1.05945	1.03753	1.01866	0.998239	0.979322	0.960485	0.939734	0.920187	0.901577	0.881905	0.86337	0.844482	0.826085	0.806038	0.786831	0.770839	0.749257	0.728827	0.710623	0.69276
0.648794	3.01464	3.00509	2.98329	2.9535	2.91267	2.86623	2.8039	2.73714	2.65968	2.57645	2.4843	2.3847	2.28073	2.16882	2.05047	1.92888	1.80198	1.66842	1.53754	1.39845	1.26208	1.23286	1.20941	1.18279	1.16369	1.14056	1.11977	1.09933	1.07884	1.05776	1.03828	1.01929	0.998933	0.978705	0.959079	0.940938	0.920845	0.901892	0.881844	0.863395	0.84277	0.825835	0.805791	0.788995	0.768175	0.749329	0.73128	0.710638	0.691092
0.649713	3.01471	3.00376	2.9848	2.95441	2.91506	2.86381	2.8062	2.73704	2.66332	2.57526	2.48523	2.38577	2.2775	2.16987	2.05415	1.92752	1.80122	1.67384	1.53258	1.3987	1.26239	1.23163	1.20815	1.1845	1.16198	1.14167	1.11981	1.09778	1.07888	1.05771	1.03969	1.01889	0.998541	0.978987	0.958922	0.939918	0.92233	0.902136	0.882304	0.861885	0.84368	0.82594	0.805466	0.787594	0.76902	0.749124	0.729649	0.711402	0.693473
0.650629	3.01589	3.00715	2.98417	2.95297	2.91642	2.86554	2.8052	2.73952	2.66505	2.57718	2.48352	0.047721	2.27849	2.17125	2.05131	1.93024	1.8015	1.67292	1.53649	1.40051	1.26127	1.2319	1.20596	1.1853	1.16232	1.14144	1.11963	1.09954	1.0797	1.05775	1.03902	1.01839	0.999688	0.978598	0.959737	0.93922	0.92241	0.902154	0.881873	0.861853	0.844796	0.823856	0.80619	0.788093	0.768065	0.749761	0.730111	0.710685	0.691828
0.651558	0.0603437	3.00763	2.98513	2.95516	0.0583091	2.86383	2.80644	2.73869	2.66044	2.58024	2.48583	2.38379	2.28219	2.1719	2.05171	1.92926	1.80047	1.66994	1.53925	1.40275	1.26228	1.23105	1.20644	1.184	1.16254	1.14221	1.12135	1.09842	1.07999	0.0211382	1.03983	1.01779	0.99838	0.979178	0.959455	0.939986	0.921368	0.901116	0.881125	0.863978	0.844458	0.826071	0.804836	0.786328	0.767877	0.749858	0.729256	0.712402	0.691218
0.652468	3.01844	3.00716	2.98687	2.95619	2.91548	2.86636	2.808	2.73689	2.66226	2.57985	2.48794	2.38592	2.28283	2.17086	2.04892	1.92914	1.79922	1.6725	1.54038	1.4013	1.26126	1.23156	1.20598	1.1854	1.16278	1.14232	1.12041	1.10071	1.07832	1.057	0.0207482	1.01866	0.998271	0.98026	0.958136	0.0188085	0.920765	0.902452	0.881105	0.86508	0.84441	0.823914	0.805536	0.786385	0.767824	0.749567	0.730246	0.710775	0.692007
0.653365	3.01764	3.00864	2.98736	2.95671	2.91839	2.86587	0.0561148	2.74187	2.66135	2.57681	2.48961	2.39124	2.27863	2.17099	2.05303	1.92786	1.80488	1.67049	1.5378	1.40051	1.26211	1.23554	1.20551	1.1867	1.16197	1.14197	1.11937	1.09895	1.07924	1.05922	1.03808	1.0181	0.998541	0.979268	0.959041	0.940963	0.921262	0.900845	0.881387	0.86373	0.84355	0.825345	0.805775	0.786844	0.768535	0.74729	0.73032	0.711216	0.69072
0.654279	3.01727	3.00702	2.99003	2.95594	2.92015	2.86507	2.80676	2.74091	2.66387	2.58042	2.48738	2.39152	2.27965	2.17006	2.05198	1.93008	1.80461	1.67174	1.53745	1.39596	1.2622	1.23259	1.20745	1.18407	1.16328	1.14156	1.12024	1.09881	1.07981	1.05922	1.03758	1.01854	0.998953	0.978106	0.960795	0.940604	0.920773	0.901442	0.882439	0.864317	0.843843	0.824086	0.804821	0.786316	0.767922	0.748497	0.729603	0.710072	0.692989
0.655214	3.01831	3.01005	2.98933	2.95795	2.91781	2.8672	2.80926	2.74067	2.66684	2.57977	2.48797	2.39037	2.28289	0.043341	2.04973	1.93069	1.8045	1.67487	1.53579	1.40109	1.26245	1.23277	1.20813	1.18523	1.162	1.14066	1.12011	1.0992	1.07872	1.05801	1.03895	1.01847	0.999718	0.981104	0.958851	0.940598	0.920104	0.901224	0.88196	0.863135	0.844803	0.822541	0.806202	0.786244	0.767779	0.748927	0.728504	0.710507	0.692362
0.65613	3.02039	3.0122	2.99237	2.96055	2.91705	2.86783	2.80702	2.74371	0.0533247	2.57904	2.4898	2.38931	2.28144	2.16938	2.05132	1.93188	1.8052	1.67125	1.53698	1.40033	1.26251	1.23426	1.20972	1.18412	1.16105	1.14087	1.12052	1.09976	1.0785	1.05847	1.03704	1.02109	0.999588	0.978882	0.959031	0.940913	0.920202	0.901143	0.883665	0.862211	0.84232	0.825164	0.805783	0.786009	0.76754	0.748575	0.729223	0.709997	0.691951
0.657034	3.02334	3.01395	2.99109	2.95939	2.91816	2.86938	2.8095	2.7417	0.0533031	0.0516676	0.049733	2.39302	2.28044	2.16886	2.05082	1.92878	1.80581	1.67114	1.54251	1.39944	1.26239	1.23263	1.20866	1.18511	1.16074	1.14022	1.12084	1.0992	1.07898	1.05888	1.03925	1.01919	0.997616	0.981138	0.959594	0.940451	0.920068	0.902362	0.881675	0.862713	0.843024	0.824361	0.804997	0.786559	0.768295	0.747211	0.729967	0.710988	0.690923
0.657936	3.02489	3.01364	2.9917	2.96136	2.91948	2.87093	2.80647	2.74158	2.66757	0.0516687	2.48906	2.38941	2.28513	2.16957	2.05148	1.93112	1.80544	1.67305	1.53678	1.40131	1.26262	1.2328	1.20961	1.18549	1.16146	0.022827	1.12029	1.10056	1.07738	1.05715	1.03876	1.01888	0.999185	0.980034	0.960436	0.939188	0.920285	0.901991	0.883017	0.861935	0.845885	0.822219	0.805587	0.785477	0.768242	0.749075	0.72854	0.709605	0.691645
0.658868	3.02769	3.01283	2.99389	2.96375	2.92163	2.87188	2.80804	2.74527	2.66628	2.5827	2.48952	2.39371	2.28381	2.17026	2.05369	1.92801	1.80553	1.67402	1.53887	1.40023	1.26279	1.23306	1.20798	1.18588	1.16347	1.14029	1.1206	1.10057	1.07786	1.05896	1.03807	1.01832	0.999126	0.978845	0.959679	0.939865	0.920592	0.901893	0.883028	0.861667	0.84327	0.825499	0.804641	0.785936	0.766298	0.747423	0.731037	0.710934	0.68941
0.659812	3.02606	3.01779	2.99557	2.96323	2.923	2.86955	2.80992	2.74494	2.66846	2.58258	2.49052	2.391	2.28734	2.17295	2.0525	1.92924	1.8046	1.67671	1.53644	1.40285	1.26249	1.232	1.20934	1.1867	1.16207	1.1406	1.12137	1.10095	1.07829	1.05741	1.03925	1.01706	1.00044	0.979004	0.958088	0.939588	0.922383	0.901125	0.882606	0.862696	0.842867	0.823646	0.805685	0.786832	0.765998	0.747145	0.728636	0.710845	0.691602
0.660709	3.02792	3.01801	2.99476	2.96576	2.92385	2.8737	2.81444	2.74392	2.66773	2.58528	2.4882	2.39104	2.28645	2.1736	2.05576	0.0386273	1.80338	1.67691	1.53793	1.40199	1.26241	1.23166	1.20765	1.18549	1.163	1.14107	1.12056	1.10004	1.07892	1.05868	1.03895	1.0173	0.998693	0.979369	0.959684	0.939229	0.921305	0.901855	0.881405	0.862958	0.844287	0.825123	0.804594	0.785276	0.765685	0.748184	0.727654	0.711051	0.691612
0.661622	3.02811	3.01774	2.99678	2.9679	2.92545	2.87479	2.81472	2.74732	2.66846	2.58579	2.48867	2.39153	2.28775	2.17572	2.05349	1.93155	1.80871	1.67134	1.53731	0.0280158	1.26259	1.23273	1.20822	1.18473	1.16243	1.14032	1.12085	1.09986	1.08082	1.05836	1.03859	1.0183	0.998441	0.979501	0.959622	0.938812	0.920637	0.901557	0.881254	0.863387	0.843918	0.825066	0.803851	0.784903	0.767615	0.74721	0.729114	0.710818	0.69091
0.662532	3.02919	3.01887	2.99832	2.96814	2.92875	2.87596	2.81655	2.74705	2.66892	2.58373	2.49061	2.39264	2.28633	2.17139	2.05767	0.038627	1.80704	1.67384	1.54276	1.39898	1.2625	1.23402	1.20977	1.18396	1.16165	1.14116	1.11931	0.0220006	1.0789	1.05981	1.04018	1.01741	0.998673	0.98026	0.958893	0.938172	0.921314	0.899596	0.881792	0.864306	0.843409	0.824672	0.8036	0.786687	0.766231	0.746934	0.728987	0.711293	0.690362
0.663442	3.03114	3.01894	2.99924	2.96811	2.92793	2.87508	2.81678	2.74808	2.67064	2.58549	2.4893	2.39266	2.28679	2.17351	2.05454	1.93506	1.80892	1.6729	1.54051	1.40294	1.26249	1.23541	1.20941	1.18696	1.16232	1.13972	1.12009	1.10014	1.07853	1.06015	1.04037	1.01739	0.997888	0.979878	0.958735	0.939263	0.922031	0.900228	0.88201	0.862169	0.842779	0.825471	0.0160561	0.786597	0.767517	0.746575	0.727631	0.710755	0.689772
0.664347	3.03038	3.02046	2.99878	2.96923	2.92681	2.87897	2.81736	2.74894	2.67129	2.58895	2.49122	2.38874	2.2872	2.1702	2.05903	1.93552	1.80797	1.67404	1.53897	1.40476	1.26245	1.23628	1.20981	1.18729	1.16116	1.14053	1.12064	1.09981	1.07792	1.06038	1.03943	1.01901	0.998411	0.979051	0.958717	0.939809	0.920791	0.900587	0.880803	0.861749	0.843213	0.825669	0.803377	0.786209	0.766358	0.747583	0.727943	0.709564	0.690664
0.665285	3.03046	3.0188	2.99967	2.96935	2.93026	2.87802	2.81723	2.75192	2.67243	2.58356	2.49604	2.39126	2.28705	2.17324	2.05629	1.93306	1.80804	1.67878	1.53985	1.40365	1.26288	1.23377	1.20982	1.18592	1.16246	1.1405	1.12022	1.09947	1.07972	1.05868	1.03854	1.01754	0.998601	0.980223	0.960337	0.939413	0.920365	0.900521	0.88196	0.861343	0.844172	0.823064	0.804011	0.785144	0.767062	0.747692	0.730264	0.707415	0.691258
0.66619	3.02986	3.0199	3.00009	2.97089	2.92876	2.88125	2.82244	2.75319	2.67286	2.58876	2.49372	2.39448	2.28632	2.17388	0.041103	1.93453	1.80848	1.67755	1.54131	1.40133	1.26271	1.23459	1.20941	1.18706	1.16209	1.13984	1.12071	1.09935	1.07849	1.06008	1.03782	1.01717	0.998813	0.979888	0.959197	0.941312	0.920121	0.900524	0.880997	0.862558	0.842704	0.823858	0.803995	0.786966	0.765588	0.746711	0.729147	0.710198	0.689351
0.667096	3.03119	3.02275	0.0600064	2.96982	2.93116	2.88174	2.82296	2.75321	2.67608	0.0517645	2.49281	2.39339	2.28862	2.17208	0.0411848	1.93283	1.80898	1.67641	1.54175	1.40248	1.26275	1.23583	1.20932	1.18551	1.16285	1.14145	1.1197	1.09849	1.07824	1.06004	1.03735	1.01966	0.998611	0.978608	0.0192025	0.940885	0.920357	0.90008	0.8802	0.863366	0.842827	0.822694	0.804437	0.785802	0.767688	0.747523	0.727203	0.709385	0.689898
0.667995	3.03272	3.02213	3.00223	2.9716	2.93019	2.88286	2.82589	2.75545	2.67597	2.58693	2.49406	2.39417	0.045761	2.17532	2.05994	1.93345	1.80487	1.674	1.54366	1.4039	1.26316	1.23626	1.20925	1.18645	1.16462	1.14089	1.11976	1.09875	1.07792	1.05732	1.03833	1.02033	0.999296	0.979856	0.960308	0.940052	0.919552	0.900216	0.881276	0.861926	0.841565	0.824247	0.805068	0.78531	0.765946	0.747706	0.730346	0.709282	0.690253
0.668881	3.03512	3.02401	3.00156	2.97213	2.93046	0.0576271	2.82552	2.75624	2.67558	2.59304	2.49478	0.0479025	0.0457358	2.17557	2.06055	1.93216	1.80791	1.67588	1.54217	1.40586	1.26288	1.23489	1.20932	1.18744	1.16272	1.14105	1.11975	1.09863	1.07841	1.05795	1.03837	1.01985	0.0199845	0.979851	0.95885	0.940526	0.919507	0.899567	0.881764	0.861436	0.842655	0.825719	0.804187	0.783851	0.766605	0.746546	0.728898	0.710494	0.69075
0.669791	3.03484	3.02392	3.0016	2.9731	2.93457	2.88025	2.82608	2.75524	2.67571	2.59133	2.49534	0.0479256	2.29044	2.1747	2.0551	1.93571	1.80724	1.67601	1.54414	1.40338	1.2633	1.23528	1.21054	1.18636	1.16345	1.14109	1.1197	1.0996	1.07939	1.05745	1.03917	1.01859	0.99841	0.978199	0.959679	0.939977	0.920095	0.901747	0.880575	0.862118	0.841606	0.82371	0.804973	0.784537	0.763756	0.747831	0.729668	0.7109	0.690661
0.670712	3.03363	3.02473	3.00442	2.97345	2.93249	2.8849	2.82452	2.75332	2.67683	2.59472	2.49765	2.3972	2.29063	2.17528	2.05466	1.93658	1.80507	1.67794	1.54004	1.40269	1.26267	1.23498	1.2112	1.18593	1.16406	1.14199	1.11974	1.09985	1.07774	1.05912	1.03832	1.01929	0.998541	0.978449	0.957745	0.940189	0.919616	0.902091	0.882056	0.860523	0.843728	0.822908	0.802869	0.785884	0.765048	0.746736	0.729513	0.710734	0.690034
0.671615	3.03623	3.02553	3.0054	2.9755	2.93342	2.88468	2.82307	2.75547	2.6779	2.5933	2.49546	2.39954	2.2907	2.17604	2.05803	1.93552	1.80561	1.67702	1.54034	1.40298	1.26245	1.23597	1.20925	1.18507	1.16318	1.14234	1.12191	1.0985	1.07897	1.05919	1.0392	1.01881	0.997827	0.978086	0.958174	0.939818	0.920068	0.900865	0.880751	0.861391	0.843647	0.823409	0.80416	0.783866	0.76641	0.746951	0.729196	0.710713	0.689749
0.672512	3.03624	3.02661	3.00682	2.97448	2.93783	2.8836	2.8254	2.75526	0.0535608	2.59153	0.0500122	2.39856	2.29262	2.17828	2.05875	1.93303	1.80512	1.67764	1.54242	1.40399	1.26277	1.23568	1.20979	0.0237294	1.16184	1.14354	1.12	1.0987	1.08	1.05919	1.03905	1.01981	0.998149	0.977141	0.958913	0.938871	0.922411	0.899422	0.879043	0.861969	0.842902	0.825033	0.804089	0.783301	0.765294	0.747371	0.730128	0.709508	0.689901
0.673437	3.03727	3.0282	3.00663	2.97778	2.93712	2.88589	0.0564392	2.7552	2.68015	2.59345	2.50019	2.3956	2.2969	2.1762	2.05934	1.93602	1.80543	1.67812	1.54157	1.40437	0.0252521	1.23437	1.20851	1.18633	1.16303	1.14419	1.11949	1.09906	1.08106	1.05872	1.04009	1.01785	0.998311	0.0195691	0.959117	0.938743	0.921297	0.899211	0.87947	0.860402	0.843516	0.822654	0.805353	0.783662	0.767615	0.746524	0.727806	0.711216	0.689782
0.674344	3.03887	3.02958	3.00739	2.97894	2.93547	2.88688	2.82418	2.75442	2.67627	2.59675	2.49988	2.39742	2.2927	2.17884	2.06041	1.93422	1.80791	1.67807	1.54073	1.40485	1.26247	1.23398	1.21139	1.18546	1.16251	1.14222	1.12055	1.09931	1.08086	1.05951	1.03808	1.0193	0.997816	0.978089	0.95914	0.940841	0.920312	0.898833	0.88079	0.859754	0.84332	0.823823	0.803416	0.785777	0.766223	0.74776	0.72887	0.708118	0.689516
0.675264	3.03846	3.03084	3.00724	2.98064	2.93694	2.88525	2.82284	2.75796	2.67575	2.59391	2.50025	2.39526	2.29696	2.18232	2.05909	1.93748	1.80706	1.67505	1.54352	1.4023	1.26344	1.2366	1.20898	1.18564	1.16368	1.1423	1.1208	1.10123	1.08071	1.05821	1.03784	1.01944	0.998693	0.97863	0.958893	0.940666	0.0183932	0.898743	0.880702	0.861371	0.8409	0.82349	0.804402	0.785278	0.766194	0.747775	0.726839	0.708426	0.69018
0.676179	3.04151	3.03112	3.00894	2.97767	2.93622	0.0577428	2.82535	0.0550884	2.67824	2.59102	2.49991	2.40107	2.29571	2.18234	2.06032	1.93751	1.80782	1.67906	1.54132	1.40615	1.26269	1.23514	1.21037	1.18585	1.1633	1.14244	1.12084	1.1003	1.08039	0.021169	1.03948	1.01843	0.998188	0.978862	0.959146	0.940249	0.92042	0.90072	0.877401	0.861146	0.841164	0.823408	0.805141	0.786194	0.765236	0.745669	0.729775	0.707449	0.68868
0.677116	3.04261	3.0302	3.00964	2.97725	2.9352	2.88509	2.82743	2.75846	2.6767	2.5941	2.50336	2.40243	2.29374	2.18401	2.05979	1.93728	1.80855	1.67637	1.54226	1.40379	1.2633	1.23611	1.21121	1.18694	1.16285	0.0228325	1.12183	1.09945	1.0799	1.05986	1.03884	1.01937	0.998974	0.978145	0.959136	0.940373	0.918811	0.899649	0.881542	0.860574	0.841016	0.823464	0.804293	0.78313	0.0153363	0.745817	0.727744	0.709087	0.689496
0.678033	3.04192	3.03131	0.0601747	2.97867	2.93569	2.88748	2.82749	2.76088	2.68131	2.59745	0.0499561	2.40122	2.29631	2.18088	2.06023	1.93845	1.81046	1.67654	1.54341	1.40261	0.0252479	1.23598	1.21118	1.18775	1.16338	1.14248	1.12056	1.09927	1.07901	1.05938	1.03796	1.01917	0.998129	0.981004	0.959098	0.940535	0.0183928	0.899532	0.881018	0.860019	0.842081	0.822229	0.802141	0.785913	0.766957	0.744926	0.726673	0.707282	0.691583
0.678924	3.04372	3.03116	3.01149	2.98009	2.93898	2.88702	2.82933	2.75938	2.68347	2.59594	2.50284	2.39913	2.29434	2.18259	0.0412199	1.93903	1.80813	1.67863	1.54261	1.40338	1.26288	1.23651	1.21096	1.18789	1.16375	1.14128	1.12113	1.10098	1.07878	1.05957	1.03738	1.01841	0.998914	0.979809	0.95957	0.938998	0.920943	0.901099	0.879354	0.86056	0.841147	0.821586	0.805525	0.785201	0.764419	0.744984	0.726833	0.70844	0.69008
0.679835	3.04326	3.03252	3.0129	2.98188	2.93832	2.88865	2.83027	2.75776	2.68388	2.59537	2.50153	2.40325	2.29694	2.18431	2.06351	1.93633	1.80836	1.67904	1.5425	1.40301	1.2638	1.23607	1.21163	1.18676	1.16362	1.1423	1.12089	1.09924	1.07967	1.05991	1.03892	1.01853	0.997857	0.979119	0.960046	0.939507	0.920548	0.899513	0.879642	0.862113	0.842123	0.821832	0.805083	0.784938	0.763551	0.745167	0.726122	0.70853	0.688913
0.680765	3.04263	3.03437	3.01365	2.98014	2.93936	2.88779	2.82966	2.75818	2.68166	2.59744	2.50302	2.40309	2.30061	2.18258	2.06265	1.93644	1.81103	1.67681	1.54362	1.40292	1.264	1.23654	1.2111	1.18605	1.16452	1.14224	1.12056	1.09936	1.07917	1.05945	1.03951	1.01989	0.998923	0.978896	0.960141	0.938681	0.918576	0.900782	0.879603	0.861763	0.84127	0.82354	0.803949	0.784494	0.764764	0.745159	0.726274	0.707854	0.689049
0.681654	0.0608984	3.03309	3.01226	2.98265	2.93983	2.88993	2.82881	2.76101	2.68501	2.59848	2.50275	2.4033	2.29822	2.18457	2.06237	1.93744	1.80871	1.68029	1.54246	1.40303	1.26395	1.23605	1.21135	1.18766	1.16386	1.14354	1.12062	1.09949	1.07937	1.05896	1.03898	1.01958	0.999287	0.978688	0.959045	0.93951	0.919598	0.899883	0.879723	0.862048	0.841311	0.82335	0.803847	0.783946	0.764511	0.745968	0.726157	0.707682	0.687967
0.68256	3.04546	3.03491	3.01226	2.98413	2.94046	2.89159	2.82907	2.76403	2.68119	2.5968	2.50287	2.40203	2.29869	2.18232	2.06164	1.93927	1.81178	1.68021	1.54122	1.40265	1.26378	1.23606	1.21129	1.18764	1.16528	1.14286	1.12094	1.10112	1.07898	1.06016	1.03776	1.01766	0.999145	0.979134	0.95915	0.939553	0.918856	0.900548	0.880858	0.86098	0.842878	0.822249	0.804144	0.784136	0.764442	0.745343	0.726362	0.705994	0.689161
0.683476	3.04583	3.03461	3.01418	2.98297	2.94223	2.88946	2.83323	2.76607	2.68141	2.5981	2.50031	2.40418	2.29665	2.18404	2.0641	1.93978	1.80666	1.67948	1.5454	1.40682	1.2629	1.23624	1.21073	1.1874	1.16552	1.14388	1.12194	1.10087	1.07782	1.05915	1.03792	1.01671	0.999136	0.979337	0.960093	0.940258	0.919533	0.898962	0.0176162	0.861769	0.841721	0.823635	0.0160692	0.783094	0.762243	0.746342	0.727696	0.707476	0.687254
0.684387	3.04607	3.03643	3.01377	2.98351	2.94212	2.89134	2.82972	2.76533	2.68332	2.59937	2.50205	2.40074	2.29689	2.18504	2.06396	1.93918	1.8099	1.67796	1.54716	1.40209	1.2638	1.23525	1.21151	1.1887	1.16578	1.1423	1.12087	1.1009	1.08006	1.05768	1.03823	1.01838	0.998682	0.9792	0.960685	0.940517	0.918386	0.899314	0.880764	0.861837	0.84177	0.82302	0.803182	0.783597	0.76344	0.745425	0.725657	0.706454	0.687291
0.685281	3.04468	3.0351	3.01601	2.98587	2.94459	2.89012	2.83059	2.76282	2.68331	2.59857	2.50388	2.40197	2.29867	2.1869	2.0635	1.93385	1.81184	1.67981	1.54427	1.40319	1.26404	1.23594	1.21058	1.18724	1.16666	1.14294	1.12046	1.10116	1.07963	1.05818	1.03867	1.01873	0.998581	0.97883	0.960784	0.939428	0.91881	0.899493	0.881139	0.860036	0.841836	0.823105	0.802916	0.783822	0.764121	0.745767	0.725077	0.706882	0.686054
0.686173	3.04559	3.03685	3.01609	0.0597541	2.94557	2.89084	2.83133	2.76406	2.68447	2.60057	0.0500708	2.40271	2.29689	2.18851	2.06215	1.93949	1.81131	1.67566	1.54259	1.40667	1.26502	1.23627	0.0242274	1.1865	1.16563	1.14227	1.12097	1.10152	1.07918	1.05897	0.0207461	1.01929	0.999125	0.979971	0.958912	0.938787	0.919886	0.899871	0.880022	0.860196	0.841647	0.8229	0.803534	0.784153	0.763872	0.745845	0.014507	0.706069	0.688992
0.687078	3.04684	3.03766	3.01606	2.98606	2.94756	2.89275	2.83135	2.76567	2.68559	2.60147	2.50315	2.40406	2.29917	2.1853	2.06461	1.94107	1.81193	1.67803	1.54087	1.40556	1.264	1.23755	1.21098	1.18606	1.16523	1.14476	1.12132	1.09997	1.07961	1.05849	1.03752	1.02041	0.999245	0.978639	0.95804	0.939364	0.920546	0.899873	0.880223	0.86023	0.842468	0.822451	0.802516	0.783482	0.764249	0.745059	0.725651	0.707032	0.687645
0.687985	3.04762	3.03738	0.0603186	2.98595	2.94519	2.89527	2.83304	2.76469	2.68625	2.59998	2.50635	2.4045	2.2961	2.18362	2.06455	1.94197	1.81106	1.67945	1.54454	0.0280842	1.26437	1.23675	1.20989	1.18781	1.16582	1.145	1.12125	1.10042	1.07834	1.05841	1.03933	1.01876	0.999255	0.979048	0.958831	0.938337	0.918937	0.900135	0.880138	0.860878	0.841352	0.822533	0.803545	0.783274	0.0153033	0.745257	0.725589	0.705994	0.68746
0.688893	3.04881	3.03823	3.01739	2.98573	2.94302	2.89479	2.83442	2.76532	2.68943	2.59894	2.50568	2.40314	2.29798	2.18612	2.06734	1.93705	1.81324	1.67985	1.54473	1.40453	1.26382	1.23589	1.21182	1.18864	1.16542	0.0228825	1.1214	1.10015	1.07836	1.05852	1.04014	1.01942	0.997304	0.978686	0.959222	0.939067	0.918685	0.900108	0.880156	0.860884	0.841164	0.823464	0.802638	0.784624	0.763769	0.744222	0.726445	0.706969	0.687232
0.689803	0.0610039	3.04032	3.01648	2.98579	2.94416	2.89437	2.83485	0.0552995	2.69226	0.0519432	2.50632	2.40798	2.29878	2.18692	2.06513	1.93821	1.81561	1.68121	1.54076	1.40714	1.2634	1.23557	1.21289	1.18775	1.16437	1.1446	1.12186	1.10006	0.0215876	1.0595	1.03837	1.01824	0.997526	0.979263	0.960647	0.938593	0.919507	0.898142	0.87952	0.860678	0.842327	0.823462	0.803835	0.783432	0.763544	0.744754	0.725727	0.706586	0.687672
0.69069	3.04875	3.03871	3.01704	2.98532	2.94697	2.89498	2.83441	2.76492	2.68903	2.60231	2.50754	2.40624	2.30113	2.18436	2.06635	1.94195	1.81298	1.67836	0.030903	1.40993	1.26392	1.23623	1.21029	1.18751	1.16531	1.14311	1.1223	0.0220266	1.07926	1.05907	1.03832	1.01889	0.999254	0.977264	0.95976	0.939709	0.919362	0.899486	0.879985	0.860275	0.841909	0.822758	0.80344	0.783693	0.763724	0.745073	0.725182	0.706757	0.0137488
0.691624	3.04835	3.03887	3.01749	2.98704	2.94534	2.89338	2.83465	2.76789	2.68792	2.60663	2.50842	2.40402	2.29883	2.18686	2.06541	1.94386	1.81322	1.67863	1.54673	1.40503	1.26456	1.23646	1.21081	1.18821	1.16571	1.1433	0.0224401	1.10102	1.07823	1.06027	1.03796	1.01877	0.999436	0.97886	0.958398	0.938683	0.919543	0.900111	0.880115	0.860732	0.842886	0.821536	0.80389	0.783714	0.764142	0.744879	0.724125	0.705346	0.687608
0.692554	3.04931	3.0397	3.01871	2.98682	2.94364	2.89436	2.83493	2.76658	2.69153	2.60588	2.50888	2.40499	2.29992	2.18628	2.06844	1.94157	1.81504	1.68048	1.54674	1.40498	1.26501	1.23642	1.21078	1.18866	1.16547	1.14264	1.12307	1.09889	1.08009	1.05925	1.0387	1.01942	0.999065	0.978074	0.958364	0.939235	0.918927	0.899825	0.880407	0.861777	0.843443	0.822131	0.80033	0.78394	0.765422	0.744359	0.725272	0.706343	0.687066
0.693486	3.04925	3.03973	3.02082	2.98584	2.94456	2.89621	2.83435	2.76507	2.69428	2.6034	2.51092	2.40611	2.30144	2.18611	2.06773	1.94219	1.81449	1.6822	1.54677	1.40551	1.26504	1.23684	1.21147	1.18838	1.16515	1.14431	1.12096	1.10065	1.07892	1.06011	1.04012	1.02019	0.996479	0.978656	0.957344	0.939996	0.919364	0.899495	0.880468	0.861092	0.842263	0.822123	0.802254	0.782297	0.765152	0.745576	0.724588	0.705898	0.687576
0.694385	3.04994	3.04209	3.02042	2.98704	2.94616	2.8967	2.83781	2.76731	2.68916	2.60607	2.51431	2.40938	2.30107	2.18425	2.06519	1.94526	0.0363226	1.68371	1.54283	1.40564	1.26531	1.23633	1.2132	1.18819	1.16594	1.14131	1.12274	1.09982	1.08088	1.0601	1.03916	1.01847	0.998099	0.977641	0.959413	0.937969	0.919806	0.899935	0.881247	0.86003	0.842605	0.821395	0.803092	0.782623	0.764599	0.744682	0.726495	0.704769	0.687728
0.69526	3.05124	3.04077	3.02101	2.99122	2.94669	2.8966	2.83589	2.76817	2.69212	2.60594	2.51358	2.41241	2.30278	2.18737	2.06523	1.94582	1.81963	1.68364	1.54339	1.40452	1.26369	1.23684	1.2113	1.18989	1.16494	1.14428	1.12159	1.10047	1.08119	1.05725	1.04052	1.01777	0.997364	0.979388	0.957792	0.938508	0.920378	0.899643	0.880758	0.860952	0.841237	0.822057	0.802164	0.783341	0.764868	0.744901	0.72552	0.7062	0.685912
0.696178	0.0610409	3.04186	3.01822	2.99019	0.0589422	2.89683	0.0567956	2.76958	2.69078	2.607	2.51364	2.40922	2.30605	0.0438132	2.06544	1.94341	1.81719	1.68586	0.0308646	1.40828	1.26503	1.23624	1.21208	1.18824	1.16624	1.14564	1.12192	1.10025	1.08013	1.06008	1.03821	1.01886	0.997897	0.979126	0.957988	0.937994	0.918748	0.900422	0.017603	0.861183	0.841515	0.821975	0.802391	0.0156623	0.765557	0.745246	0.723857	0.704486	0.687274
0.69711	3.05276	3.04109	3.01815	2.99116	2.95103	2.90059	2.83998	2.77123	2.69074	0.0521647	2.51376	2.41152	2.30322	2.18805	2.06922	1.9431	1.81703	1.68165	1.54705	1.40721	1.26545	1.23532	1.21292	1.18785	1.16616	1.14437	1.12314	1.10023	1.08055	1.05922	1.03998	1.01671	0.997353	0.979129	0.956892	0.938352	0.921633	0.900015	0.880068	0.86105	0.840737	0.821348	0.80175	0.78401	0.764165	0.745127	0.726309	0.705436	0.686445
0.698018	3.05232	3.04257	3.01998	2.98924	2.9517	2.90117	2.84096	2.77048	2.69315	2.60716	2.51663	2.4095	2.303	2.18738	2.06849	0.0388788	1.81565	1.68301	1.54734	1.4063	1.26571	1.23815	1.21093	1.18888	1.16498	1.14376	0.0224447	1.10174	1.08075	1.0583	1.03838	1.01769	0.998751	0.978248	0.0191497	0.93907	0.919391	0.902359	0.878497	0.86171	0.84186	0.820798	0.801992	0.783455	0.762909	0.745368	0.725092	0.70687	0.687228
0.698939	3.05401	3.04189	3.02192	2.99203	2.95129	2.90201	2.83679	2.77345	2.69444	2.60766	2.51187	2.41152	2.30418	2.18564	2.07498	1.94339	1.81574	1.68632	1.54553	1.40769	1.26602	1.23634	1.21149	1.18969	1.16634	1.1434	1.12269	1.10274	1.07994	1.05836	1.03973	1.01813	0.997062	0.979256	0.958164	0.938988	0.91948	0.899511	0.880584	0.86105	0.84191	0.820586	0.801863	0.782628	0.762945	0.744797	0.726267	0.705948	0.686827
0.699847	3.05409	0.0608649	3.02201	2.99205	2.95423	2.90227	2.83764	2.7745	2.69764	2.6081	2.51147	2.41197	2.30521	2.18844	2.06937	1.95115	1.81446	1.68184	1.55319	1.40854	1.26559	1.2357	1.21168	1.18857	1.1677	1.14517	1.12142	0.0220457	1.0806	1.05814	1.03943	1.01737	0.998793	0.977626	0.0191888	0.939783	0.919804	0.898429	0.880094	0.860182	0.840541	0.82263	0.802161	0.783252	0.762182	0.744222	0.724021	0.70762	0.686436
0.700765	3.0537	3.04341	3.02425	2.99343	2.95174	2.89978	2.84326	2.77572	2.69809	2.60673	2.51126	2.41172	2.30741	2.18925	2.07108	0.0389493	1.81628	1.68444	1.54844	1.40801	1.26659	1.23657	1.21077	1.19072	1.16646	1.14537	1.12269	1.10199	1.07902	1.05957	1.03799	1.01781	0.998188	0.978928	0.959217	0.939092	0.919091	0.899556	0.879975	0.860557	0.841925	0.82088	0.802094	0.782486	0.762738	0.744215	0.726453	0.704266	0.686272
0.701682	3.05431	3.04259	3.02543	2.99416	2.95331	2.90264	2.84189	2.77552	2.69545	2.61142	2.51208	2.41097	2.30243	2.1913	2.07029	1.94805	1.81923	1.68347	1.54677	1.40534	1.26681	1.23751	1.21171	1.19011	1.16722	1.14531	1.12311	0.022028	1.07989	1.05791	1.03808	1.01681	0.999487	0.979871	0.95834	0.939556	0.918756	0.900647	0.879629	0.860422	0.840631	0.821142	0.802251	0.78208	0.763103	0.744204	0.72494	0.706057	0.685426
0.702577	3.05573	3.04602	3.02478	2.993	2.95256	2.90441	2.8432	2.77144	2.69856	2.61071	2.51306	2.4089	2.30405	2.18913	2.07437	1.94412	1.8192	1.68399	1.54883	1.40673	1.26656	1.23741	1.2137	1.18876	1.16615	1.14517	0.0224499	1.10177	1.07916	1.05786	1.03863	1.01835	0.998974	0.979112	0.960609	0.93786	0.919506	0.899486	0.879515	0.859235	0.841418	0.822835	0.800921	0.781743	0.763409	0.744028	0.725458	0.704239	0.686456
0.7035	3.05815	3.0468	0.0604583	2.99321	2.95329	2.90276	2.84831	2.77167	2.697	2.60816	2.5133	2.41116	0.0460558	2.19113	2.07235	1.94855	1.81573	1.68468	1.54776	1.40696	1.26652	1.23792	1.21273	1.19033	1.16795	1.14384	1.12321	1.10087	1.0789	1.05942	1.03865	1.01828	0.999064	0.9798	0.958869	0.938309	0.919362	0.898593	0.879423	0.861293	0.840673	0.821953	0.801828	0.781166	0.76287	0.745195	0.724222	0.705183	0.686475
0.70441	3.05909	3.04715	3.02374	0.0598993	2.95508	2.90498	2.84531	2.77129	2.69893	0.0521627	2.51425	2.41298	2.30479	2.19162	2.07382	1.94536	1.81675	1.68904	1.54743	1.40793	1.2663	1.23779	1.21386	1.1904	1.16575	1.14679	1.12137	1.1002	1.08052	1.05985	1.0384	1.01822	0.0199738	0.97886	0.957407	0.939865	0.917888	0.899665	0.878709	0.862555	0.840721	0.821533	0.801398	0.781128	0.762445	0.746233	0.72382	0.706436	0.685118
0.705333	3.05865	3.0485	3.025	2.99443	2.95653	2.90528	2.84335	2.77439	2.69407	2.61052	2.51736	2.41566	2.30452	2.18988	2.06835	1.94908	1.81914	1.68372	1.55066	1.40833	1.26595	1.23755	1.21449	1.19118	0.0233291	1.14304	1.12344	1.1004	1.08038	1.05887	0.0208028	1.01916	0.998128	0.977589	0.957874	0.938365	0.919769	0.898016	0.881441	0.86083	0.839369	0.821903	0.80096	0.782747	0.763193	0.744664	0.722479	0.705879	0.686231
0.706262	3.05939	3.0485	3.0248	2.99662	2.95527	2.90561	2.84565	2.77011	2.69715	2.61257	2.5173	2.41504	2.3053	2.19201	2.07022	1.94819	0.0364	1.68522	1.54825	1.40845	1.26639	1.23741	1.21443	1.19036	1.16783	1.14401	1.12128	0.0219952	1.0799	1.06033	0.0207799	1.01841	0.998702	0.977641	0.958245	0.93873	0.920312	0.898268	0.880211	0.860594	0.839721	0.822397	0.801726	0.782981	0.762781	0.742387	0.724926	0.705451	0.683614
0.707194	3.05947	3.04744	3.02592	0.0599401	2.95892	2.90505	2.84542	2.77173	2.69754	2.61385	2.5174	2.41601	2.30606	2.19259	2.07008	1.95063	1.82084	1.68364	1.54752	1.40881	1.26653	1.23922	1.21519	1.18991	1.16586	1.14377	1.12363	1.10044	1.07979	1.05818	1.03898	1.01891	0.99843	0.979237	0.0191366	0.940049	0.919479	0.899384	0.878038	0.861899	0.841565	0.821316	0.80101	0.782239	0.762626	0.742078	0.72391	0.704184	0.686198
0.7081	3.05824	3.04836	3.02691	2.99676	2.95744	2.90745	2.8471	2.77382	2.70013	2.61135	0.0503375	2.4173	2.30511	2.18805	2.07705	1.94853	1.82009	1.68286	1.54763	1.41128	1.2673	1.23822	1.21407	1.18956	1.16526	1.14482	1.12363	1.1002	1.08077	1.05872	1.03934	1.01929	0.997534	0.977648	0.960057	0.938833	0.919959	0.899347	0.879022	0.86032	0.840828	0.820324	0.80153	0.782298	0.763217	0.741852	0.723889	0.704755	0.686889
0.709007	3.05781	3.0475	3.02826	2.99507	2.95986	2.90773	2.84823	2.77585	2.69688	2.60997	2.51898	2.41608	2.30429	2.19587	2.07344	1.95062	0.0363774	1.68402	1.54691	1.41104	1.26728	1.23842	1.21344	1.18963	1.16587	1.14687	1.12073	1.10112	1.08133	1.05901	1.03927	1.02069	0.996808	0.977957	0.958941	0.938268	0.91969	0.900287	0.878055	0.860041	0.840967	0.822475	0.799942	0.782215	0.763881	0.742063	0.723529	0.705601	0.685103
0.709955	3.05685	3.04832	3.02766	2.99835	2.95677	2.90948	0.0569545	2.77611	2.69998	2.61016	0.0503509	2.4188	2.30695	2.19273	2.07534	1.94569	1.82185	1.68678	1.54757	1.40859	1.26791	0.0247503	1.21238	1.19016	1.1661	1.14298	1.12296	1.10156	1.08231	1.05989	1.03845	1.01819	0.997736	0.98011	0.958879	0.938194	0.918937	0.899079	0.880433	0.857753	0.84123	0.822784	0.80087	0.781	0.761505	0.743662	0.724099	0.707131	0.684478
0.710866	3.05762	3.04942	3.02954	2.99944	2.95773	2.90912	2.84552	2.7791	2.69826	2.61131	0.0503503	2.41967	2.31159	2.19499	2.07198	1.9475	1.8197	1.68502	1.54884	1.40822	1.26862	1.23868	1.21242	1.18885	1.16643	1.14448	1.12419	1.10245	1.07966	1.05937	1.03925	1.0204	0.996237	0.97909	0.0191522	0.0187771	0.919752	0.89871	0.879711	0.857429	0.84191	0.820073	0.801687	0.780925	0.76421	0.742828	0.723807	0.706387	0.68502
0.711783	3.06008	3.05076	0.0606143	2.99945	2.9579	2.90766	2.8476	2.7762	2.69944	2.61189	2.51981	2.41849	2.30936	2.19295	2.07364	1.94976	1.8205	1.68456	1.55021	1.40822	1.26854	1.23815	1.21298	1.18826	1.16596	1.14481	1.12395	1.10143	1.08153	1.05773	1.03988	1.01823	0.998601	0.978825	0.95754	0.939532	0.918286	0.899781	0.878473	0.859227	0.840737	0.820856	0.800466	0.781428	0.764083	0.7429	0.724907	0.704398	0.685011
0.712689	3.06033	3.05177	3.0296	2.99916	2.95906	2.90768	2.84832	2.77587	2.69878	2.61631	2.52005	2.41639	2.31004	2.19158	2.07648	1.94642	1.81979	1.68656	1.55015	1.40978	1.26823	1.23529	1.21503	1.18969	1.16514	1.14518	1.1246	1.10127	1.08068	1.05921	1.03932	1.01834	0.997423	0.978566	0.957526	0.938434	0.920892	0.897951	0.878076	0.858891	0.841483	0.819983	0.801589	0.781053	0.763791	0.743971	0.723516	0.702695	0.685671
0.713628	3.06062	3.05111	3.02951	3.00019	2.95798	2.90882	2.85074	2.77773	2.70099	2.61434	2.52011	2.42049	2.30801	0.043892	2.07266	1.94627	1.82119	1.68495	1.54939	1.40927	1.26798	1.23802	1.21252	1.18893	1.16697	1.14426	1.1238	1.10224	1.0805	1.06001	1.03915	1.01767	0.996891	0.98012	0.957864	0.93896	0.919036	0.898601	0.879263	0.859046	0.838943	0.820578	0.801679	0.782396	0.763425	0.743838	0.722619	0.0140626	0.685133
0.714526	3.0603	3.05005	3.03295	3.0003	2.95947	2.90815	2.85096	2.78237	2.69807	2.61334	2.52128	2.42241	2.30834	2.19491	2.07346	1.94796	1.82007	1.68458	1.54914	1.41143	1.26789	0.0247804	1.21106	1.19086	1.16716	1.14466	1.12367	1.10114	1.08071	1.05973	0.0207724	1.01796	0.997596	0.978468	0.958912	0.939887	0.917246	0.899094	0.879019	0.860055	0.83782	0.822097	0.801863	0.781293	0.762975	0.743874	0.723096	0.70327	0.685372
0.715451	0.0612139	3.05172	3.03274	3.00203	2.96024	0.0581799	2.8491	2.78501	2.70159	2.61627	2.5188	2.41981	2.30804	2.19631	2.07077	1.94806	0.0364369	1.68426	1.54959	1.41281	1.2677	1.2377	1.21547	1.1905	1.16676	1.14542	1.12249	1.10218	1.07991	1.05869	1.03776	1.0196	0.998622	0.978449	0.957807	0.938122	0.918006	0.899727	0.878816	0.859477	0.840131	0.819687	0.801714	0.783522	0.763104	0.742354	0.724513	0.703867	0.683414
[truncated: 94 more rows]
[truncated: 10 more columns]

## Sheet: Fig 4 PD59 1x
time	norm Keq
[truncated: 750 more rows]
[truncated: 10 more columns]

## Sheet: Fig 4 PD17 25x
time	norm Keq
[truncated: 878 more rows]
[truncated: 10 more columns]

## Sheet: Fig 4 PD59 25x
time	norm Keq
[truncated: 809 more rows]
[truncated: 10 more columns]

## Sheet: Fig 5
PD59												PD17
[truncated: 879 more rows]

## Sheet: Fig 6
current densities
[truncated: 27 more rows]

[truncated: 3 more sheets: Fig 7, Fig 8, Fig 9]
